# Supplementary material for: Antiglioma Natural Products from the Marine-Associated Fungus Penicillium sp. ZZ1750
Source: MDPI journal article supplement (doi:10.3390/molecules27207099), 2022-10-20
Supplement: s1 [file s1]

***SUPPLEMENTARY MATERIALS FOR***

**Antiglioma natural products from the marine-associated fungus *Penicillium* sp. ZZ1750**

**Kuo Yong<sup>1,†</sup>, Sidra Kaleem<sup>1,†</sup>, Mingzhu Ma<sup>1,3</sup>, Xiao yuan Lian<sup>2,\*</sup>, Zhizhen Zhang<sup>1,\*</sup>**

1 Ocean College, Zhoushan Campus, Zhejiang University, Zhoushan 316021, China

2 College of Pharmaceutical Sciences, Zhejiang University, Hangzhou 310058, China

3 Zhejiang Marine Development Research Institute, Zhoushan, 316000, China

† These authors contributed equally to this work.

\* Correspondence: xylian@zju.edu.cn (X.L.); zzhang88@zju.edu.cn (Z.Z.); Tel: +86-13675859706 (Z.Z)

## CONTENT

|                                                                                                                                                           |    |
|-----------------------------------------------------------------------------------------------------------------------------------------------------------|----|
| Table S1. Sequences producing significant alignments of strain ZZ1750.....                                                                                | 5  |
| Table S2. <sup>13</sup> C NMR (150 MHz) and <sup>1</sup> H NMR (600 MHz) data of compounds <b>4</b> and <b>5</b> (in DMSO- <i>d</i> <sub>6</sub> )...     | 6  |
| Table S3. <sup>13</sup> C NMR (150 MHz) and <sup>1</sup> H NMR (600 MHz) data of compounds <b>6–8</b> (in DMSO- <i>d</i> <sub>6</sub> ).....              | 7  |
| Table S4. <sup>13</sup> C NMR (150 MHz) and <sup>1</sup> H NMR (600 MHz) data of compounds <b>9</b> and <b>10</b> (in DMSO- <i>d</i> <sub>6</sub> )..     | 7  |
| Table S5. <sup>13</sup> C NMR (150 MHz) and <sup>1</sup> H NMR (600 MHz) data of compounds <b>11</b> and <b>12</b> (in DMSO- <i>d</i> <sub>6</sub> )..... | 8  |
| Table S6. <sup>1</sup> H NMR data of the MTPA esters <b>1s</b> and <b>1r</b> (600 MHz, in MeOH- <i>d</i> <sub>4</sub> , <i>J</i> in Hz).....              | 9  |
| Table S7. Gibbs free energies and equilibrium populations of low-energy conformers of <b>1f</b> .....                                                     | 10 |
| Table S8. Cartesian coordinates for the low-energy reoptimized MMFF conformers of <b>1f</b> at B3LYP/6-31+g (d, p) level of theory in MeOH.....           | 10 |
| Table S9. Gibbs free energies and equilibrium populations of low-energy conformers of <b>1g</b> .....                                                     | 21 |
| Table S10. Cartesian coordinates for the low-energy reoptimized MMFF conformers of <b>1g</b> at B3LYP/6-31+g (d, p) level of theory in MeOH.....          | 21 |
| Table S11. Gibbs free energies and equilibrium populations of low-energy conformers of <b>1h</b> .....                                                    | 32 |
| Table S12. Cartesian coordinates for the low-energy reoptimized MMFF conformers of <b>1h</b> at B3LYP/6-31+g (d, p) level of theory in MeOH.....          | 32 |
| Table S13. Gibbs free energies and equilibrium populations of low-energy conformers of <b>1i</b> .....                                                    | 41 |
| Table S14. Cartesian coordinates for the low-energy reoptimized MMFF conformers of <b>1i</b> at B3LYP/6-31+g (d, p) level of theory in MeOH.....          | 41 |
| Table S15. Boltzmann population and optical rotation (OR) of low-energy conformers of <b>11R-2</b> .....                                                  | 54 |
| Table S16. Cartesian coordinates for the low-energy reoptimized MMFF conformers of <b>11R-2</b> at B3LYP/6-311+G (d, p) level of theory in MeOH.....      | 54 |
| Table S17. Boltzmann population and optical rotation (OR) of low-energy conformers of <b>11S-2</b> .....                                                  | 59 |
| Table S18. Cartesian coordinates for the low-energy reoptimized MMFF conformers of <b>11S-2</b> at B3LYP/6-311+G (d, p) level of theory in MeOH.....      | 59 |
| Table S19. Gibbs free energies and equilibrium populations of low-energy conformers of <b>11R-2</b> .....                                                 | 64 |
| Table S20. Cartesian coordinates for the low-energy reoptimized MMFF conformers of <b>11R-2</b> at B3LYP/6-311+G (d, p) level of theory in MeOH.....      | 64 |
| Table S21. Gibbs free energies and equilibrium populations of low-energy conformers of <b>11S-2</b> .....                                                 | 69 |
| Table S22. Cartesian coordinates for the low-energy reoptimized MMFF conformers of <b>11S-2</b> at B3LYP/6-311+G (d, p) level of theory in MeOH.....      | 69 |
| Table S23. Boltzmann population and optical rotation (OR) of low-energy conformers of <b>11R-3</b> .....                                                  | 74 |
| Table S24. Cartesian coordinates for the low-energy reoptimized MMFF conformers of <b>11R-3</b> at B3LYP/6-311+G (d, p) level of theory in MeOH.....      | 74 |

|                                                                                                                                                       |     |
|-------------------------------------------------------------------------------------------------------------------------------------------------------|-----|
| Table S25. Boltzmann populations and optical rotation (OR) of low-energy conformers of 11S- <b>3</b> ....                                             | 79  |
| Table S26. Cartesian coordinates for the low-energy reoptimized MMFF conformers of 11S- <b>3</b> at B3LYP/6-311+G (d, p) level of theory in MeOH..... | 79  |
| Table S27. Gibbs free energies and equilibrium populations of low-energy conformers of 11R- <b>3</b> .....                                            | 84  |
| Table S28. Cartesian coordinates for the low-energy reoptimized MMFF conformers of 11R- <b>3</b> at B3LYP/6-31+g (d, p) level of theory in MeOH.....  | 84  |
| Table S29. Gibbs free energies and equilibrium populations of low-energy conformers of 11S- <b>3</b> .....                                            | 89  |
| Table S30. Cartesian coordinates for the low-energy reoptimized MMFF conformers of 11S- <b>3</b> at B3LYP/6-31+g (d, p) level of theory in MeOH.....  | 89  |
| Figure S1. ITS rDNA sequence of <i>Penicillium</i> sp. ZZ1750.....                                                                                    | 95  |
| Figure S2. Static culture state of strain <i>Penicillium</i> sp. ZZ1750 in GA liquid medium.....                                                      | 95  |
| Figures S3–S6. <sup>1</sup> H NMR spectra of penipyridinone B ( <b>1</b> , in MeOH- <i>d</i> <sub>4</sub> ).....                                      | 96  |
| Figures S7–S10. <sup>13</sup> C NMR spectra of penipyridinone B ( <b>1</b> , in MeOH- <i>d</i> <sub>4</sub> ) .....                                   | 98  |
| Figures S11–S13. DEPT spectra of penipyridinone B ( <b>1</b> , in MeOH- <i>d</i> <sub>4</sub> ) .....                                                 | 100 |
| Figures S14–S17. HMQC spectra of penipyridinone B ( <b>1</b> , in MeOH- <i>d</i> <sub>4</sub> ).....                                                  | 101 |
| Figures S18–S20. COSY spectra of penipyridinone B ( <b>1</b> , in MeOH- <i>d</i> <sub>4</sub> ) .....                                                 | 103 |
| Figures S21–S23. HMBC spectra of penipyridinone B ( <b>1</b> , in MeOH- <i>d</i> <sub>4</sub> ) .....                                                 | 105 |
| Figure S24. NOE spectrum of penipyridinone B ( <b>1</b> , in MeOH- <i>d</i> <sub>4</sub> ) .....                                                      | 106 |
| Figures S25–S28. <sup>1</sup> H NMR spectra of penipyridinone B ( <b>1</b> , in DMSO- <i>d</i> <sub>6</sub> ) .....                                   | 107 |
| Figures S29–S32. <sup>13</sup> C NMR spectra of penipyridinone B ( <b>1</b> , in DMSO- <i>d</i> <sub>6</sub> ) .....                                  | 109 |
| Figures S33–S36. HMQC spectra of penipyridinone B ( <b>1</b> , in DMSO- <i>d</i> <sub>6</sub> ) .....                                                 | 111 |
| Figures S37–S39. HMBC spectra of penipyridinone B ( <b>1</b> , in DMSO- <i>d</i> <sub>6</sub> ) .....                                                 | 113 |
| Figure S40. HRESIMS spectrum of penipyridinone B ( <b>1</b> ) .....                                                                                   | 114 |
| Figure S41. <sup>1</sup> H NMR spectrum of <b>1s</b> .....                                                                                            | 115 |
| Figure S42. COSY NMR spectrum of <b>1s</b> .....                                                                                                      | 115 |
| Figure S43. HRESIMS spectrum of <b>1s</b> .....                                                                                                       | 116 |
| Figure S44. <sup>1</sup> H NMR spectrum of <b>1r</b> .....                                                                                            | 116 |

|                                                                                                                 |     |
|-----------------------------------------------------------------------------------------------------------------|-----|
| Figure S45. COSY spectrum of <b>1r</b> .....                                                                    | 117 |
| Figure S46. HRESIMS spectrum of <b>1r</b> .....                                                                 | 117 |
| Figures S47–S49. <sup>1</sup> H NMR spectra of penilloid B ( <b>2</b> , in DMSO- <i>d</i> <sub>6</sub> ).....   | 118 |
| Figures S50–S51. <sup>13</sup> C NMR spectra of penilloid B ( <b>2</b> , in DMSO- <i>d</i> <sub>6</sub> ) ..... | 119 |
| Figures S52–S53. HMQC spectra of penilloid B ( <b>2</b> , in DMSO- <i>d</i> <sub>6</sub> ) .....                | 120 |
| Figure S54. COSY spectrum of penilloid B ( <b>2</b> , in DMSO- <i>d</i> <sub>6</sub> ) .....                    | 121 |
| Figures S55–S58. HMBC spectra of penilloid B ( <b>2</b> , in DMSO- <i>d</i> <sub>6</sub> ) .....                | 122 |
| Figure S59. NOESY spectrum of penilloid B ( <b>2</b> , in DMSO- <i>d</i> <sub>6</sub> ) .....                   | 124 |
| Figures S60–S62. <sup>1</sup> H NMR spectra of penilloid B ( <b>2</b> , in MeOH- <i>d</i> <sub>4</sub> ).....   | 124 |
| Figures S63–S64. <sup>13</sup> C NMR spectra of penilloid B ( <b>2</b> , in MeOH- <i>d</i> <sub>4</sub> ) ..... | 126 |
| Figure S65. HRESIMS spectrum of penilloid B ( <b>2</b> ) .....                                                  | 127 |
| Figures S66–S68. <sup>1</sup> H NMR spectra of penilloid C ( <b>3</b> , in DMSO- <i>d</i> <sub>6</sub> ) .....  | 127 |
| Figures S69–S70. <sup>13</sup> C NMR spectra of penilloid C ( <b>3</b> , in DMSO- <i>d</i> <sub>6</sub> ) ..... | 129 |
| Figures S71–S72. HMQC spectra of penilloid C ( <b>3</b> , in DMSO- <i>d</i> <sub>6</sub> ) .....                | 130 |
| Figure S73. COSY spectrum of penilloid C ( <b>3</b> , in DMSO- <i>d</i> <sub>6</sub> ) .....                    | 131 |
| Figures S74–S76. HMBC spectra of penilloid C ( <b>3</b> , in DMSO- <i>d</i> <sub>6</sub> ) .....                | 131 |
| Figure S77. NOESY spectrum of penilloid C ( <b>3</b> , in DMSO- <i>d</i> <sub>6</sub> ).....                    | 133 |
| Figures S78–S80. <sup>1</sup> H NMR spectra of penilloid C ( <b>3</b> , in MeOH- <i>d</i> <sub>4</sub> ) .....  | 133 |
| Figures S81–S82. <sup>13</sup> C NMR spectra of penilloid C ( <b>3</b> , in MeOH- <i>d</i> <sub>4</sub> ) ..... | 135 |
| Figure S83. HRESIMS spectrum of penilloid C ( <b>3</b> ) .....                                                  | 136 |



Table S1. Sequences producing significant alignments of strain ZZ1750

| Accession  | Description                                                                                                                                                                                                                                                            | Max<br>score | Total<br>score | Query<br>coverage | Evalue | Ident |
|------------|------------------------------------------------------------------------------------------------------------------------------------------------------------------------------------------------------------------------------------------------------------------------|--------------|----------------|-------------------|--------|-------|
| MT364482.1 | <i>Penicillium rubens</i> strain EF5 small subunit ribosomal RNA gene, partial sequence; internal transcribed spacer 1, 5.8S ribosomal RNA gene, and internal transcribed spacer 2, complete sequence; and large subunit ribosomal RNA gene, partial sequence          | 1040         | 1040           | 100%              | 0.0    | 100%  |
| MK830090.1 | <i>Penicillium chrysogenum</i> strain CD3 small subunit ribosomal RNA gene, partial sequence; internal transcribed spacer 1, 5.8S ribosomal RNA gene                                                                                                                   | 1040         | 1040           | 100%              | 0.0    | 100%  |
| MH863913.1 | <i>Penicillium chrysogenum</i> strain CBS 126337 small subunit ribosomal RNA gene, partial sequence; internal transcribed spacer 1, 5.8S ribosomal RNA gene                                                                                                            | 1040         | 1040           | 100%              | 0.0    | 100%  |
| MN341258.1 | <i>Penicillium rubens</i> isolate KoRLI047057 small subunit ribosomal RNA gene, partial sequence; internal transcribed spacer 1, 5.8S ribosomal RNA gene, and internal transcribed spacer 2, complete sequence; and large subunit ribosomal RNA gene, partial sequence | 1040         | 1040           | 100%              | 0.0    | 100%  |
| MN413181.1 | <i>Penicillium rubens</i> strain DTO269E3 small subunit ribosomal RNA gene, partial sequence; internal transcribed spacer 1, 5.8S ribosomal RNA gene, and internal transcribed spacer 2, complete sequence; and large subunit ribosomal RNA gene, partial sequence     | 1040         | 1040           | 100%              | 0.0    | 100%  |
| MN413180.1 | <i>Penicillium rubens</i> strain DTO269C2 small subunit ribosomal RNA gene, partial sequence; internal transcribed spacer 1, 5.8S ribosomal RNA gene, and internal transcribed spacer 2, complete sequence; and large subunit ribosomal RNA gene, partial sequence     | 1040         | 1040           | 100%              | 0.0    | 100%  |

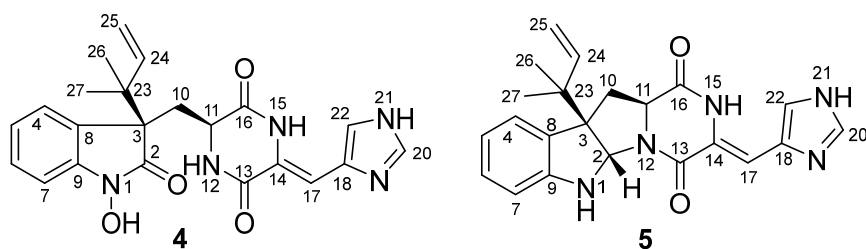

Compounds 4 and 5.

Table S2.  $^{13}\text{C}$  NMR (150 MHz) and  $^1\text{H}$  NMR (600 MHz) data of compounds 4 and 5 (in  $\text{DMSO-}d_6$ )

| No. | 4                                 |                                               | 5                                 |                                               |
|-----|-----------------------------------|-----------------------------------------------|-----------------------------------|-----------------------------------------------|
|     | $\delta_{\text{C}}$ , type        | $\delta_{\text{H}}$ , $J$ in Hz               | $\delta_{\text{C}}$ , type        | $\delta_{\text{H}}$ , $J$ in Hz               |
| 1   | —                                 | 6.86, br s                                    | —                                 | —                                             |
| 2   | 172.8, C                          | —                                             | 76.9, CH                          | 5.56, s                                       |
| 3   | 55.0, C                           | —                                             | 60.8, C                           | —                                             |
| 4   | 125.3, CH                         | 7.20, d (7.5)                                 | 125.6, CH                         | 7.18, d (7.5)                                 |
| 5   | 121.9, CH                         | 7.02, t (7.5)                                 | 118.9, CH                         | 6.99, t (7.5)                                 |
| 6   | 128.5, CH                         | 7.29, t (7.5)                                 | 128.7, CH                         | 6.61, t (7.5)                                 |
| 7   | 106.9, CH                         | 6.96, d (7.5)                                 | 108.2, CH                         | 6.52, d (7.5)                                 |
| 8   | 124.2, C                          | —                                             | 128.4, C                          | —                                             |
| 9   | 143.1, C                          | —                                             | 151.4, C                          | —                                             |
| 10  | 36.3, $\text{CH}_2$               | 2.63, dd (14.6, 2.2);<br>2.33, dd (14.6, 8.5) | 37.6, $\text{CH}_2$               | 2.38, dd (12.0, 5.9);<br>2.33 dd (12.0, 11.5) |
| 11  | 52.6, C                           | 3.29 <sup>a</sup>                             | 58.3, CH                          | 4.00, dd (11.5, 5.9)                          |
| 12  | —                                 | 10.76, br s                                   | —                                 | —                                             |
| 13  | 158.5, C                          | —                                             | 156.5, C                          | —                                             |
| 14  | 125.0, C                          | —                                             | 124.8, C                          | —                                             |
| 15  | —                                 | 12.53, br s                                   | —                                 | 12.57, br s                                   |
| 16  | 164.3, C                          | —                                             | 164.4, C                          | —                                             |
| 17  | 103.9, CH                         | 6.46, s                                       | 104.1, CH                         | 6.59, s                                       |
| 18  | 136.3, C                          | —                                             | 136.3, C                          | —                                             |
| 20  | 136.4, CH                         | 7.90, s                                       | 136.4, CH                         | 7.92, s                                       |
| 21  | —                                 | 11.36, s                                      | —                                 | 12.55, s                                      |
| 22  | 118.8, CH                         | 7.46, s                                       | 117.3, CH                         | 7.52, s                                       |
| 23  | 42.1, C                           | —                                             | 40.7, C                           | —                                             |
| 24  | 142.6, CH                         | 5.98, dd (17.5, 10.5)                         | 144.1, CH                         | 6.01, dd (17.5, 10.5)                         |
| 25  | 114.2, CH                         | 5.08, d (10.5);<br>4.96, d (17.5)             | 113.9, CH                         | 5.07, d (10.5);<br>5.04, d (17.5)             |
| 26  | 21.9 <sup>b</sup> , $\text{CH}_3$ | 1.03 <sup>b</sup> s                           | 22.6 <sup>b</sup> , $\text{CH}_3$ | 1.06 <sup>b</sup> , s                         |
| 27  | 21.5 <sup>b</sup> , $\text{CH}_3$ | 0.94 <sup>b</sup> , s                         | 22.3 <sup>b</sup> , $\text{CH}_3$ | 0.93 <sup>b</sup> , s                         |

<sup>a</sup> The signal was overlapped with that of  $\text{H}_2\text{O}$ ; <sup>b</sup> The data with the same label in each column may be interchanged.

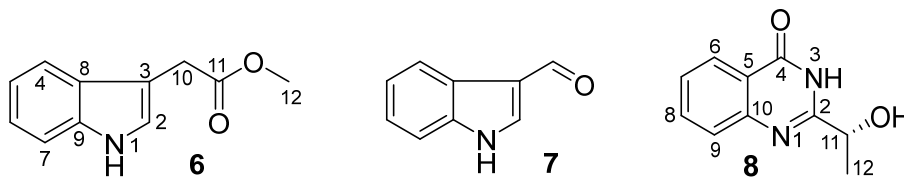

Compounds 6–8.

Table S3.  $^{13}\text{C}$  NMR (150 MHz) and  $^1\text{H}$  NMR (600 MHz) data of compounds **6–8** (in  $\text{DMSO-}d_6$ )

| No. | <b>6</b>                   |                                 | <b>7</b>                   |                                 | <b>8</b>                   |                                 |
|-----|----------------------------|---------------------------------|----------------------------|---------------------------------|----------------------------|---------------------------------|
|     | $\delta_{\text{C}}$ , type | $\delta_{\text{H}}$ , $J$ in Hz | $\delta_{\text{C}}$ , type | $\delta_{\text{H}}$ , $J$ in Hz | $\delta_{\text{C}}$ , type | $\delta_{\text{H}}$ , $J$ in Hz |
| 1   | —                          | 10.95, br s                     | —                          | 12.14, br s                     | —                          | —                               |
| 2   | 124.1, CH                  | 7.24, d (1.9)                   | 137.0, CH                  | 8.28, s                         | 160.7, C                   | —                               |
| 3   | 106.9, C                   | —                               | 118.1, C                   | —                               | —                          | —                               |
| 4   | 118.5, CH                  | 7.47, d (8.2)                   | 122.1, CH                  | 8.08, d (8.0)                   | 162.9, C                   | —                               |
| 5   | 118.4, CH                  | 6.97, t (8.2)                   | 120.8, CH                  | 7.20, t (8.0)                   | 121.4, C                   | —                               |
| 6   | 121.0 CH                   | 7.06, t (8.2)                   | 123.4, CH                  | 7.24, t (8.0)                   | 126.5 CH                   | 8.01, d (8.0)                   |
| 7   | 111.4, CH                  | 7.34, d (8.2)                   | 112.4, CH                  | 7.50, d (8.0)                   | 127.2, CH                  | 7.38, t (8.0)                   |
| 8   | 127.0, C                   | —                               | 124.1, C                   | —                               | 135.3, CH                  | 7.68, t (8.0)                   |
| 9   | 136.1, C                   | —                               | 138.5, C                   | —                               | 127.1, CH                  | 7.55, d (8.0)                   |
| 10  | 30.6, $\text{CH}_2$        | 3.74, s                         | 184.9, CH                  | 9.93, s                         | 148.5, C                   | —                               |
| 11  | 172.0, C                   | —                               | —                          | —                               | 67.7, CH                   | 4.61, q (6.9)                   |
| 12  | 51.5, $\text{CH}_3$        | 3.60, s                         | —                          | —                               | 22.3, $\text{CH}_3$        | 1.40, d (6.9)                   |

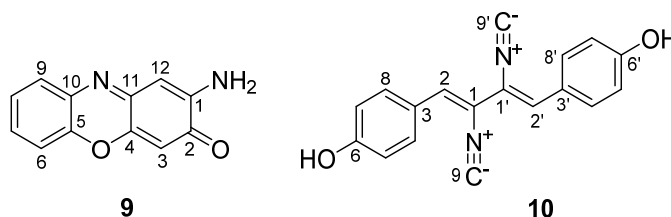

Compounds 9 and 10.

Table S4.  $^{13}\text{C}$  NMR (150 MHz) and  $^1\text{H}$  NMR (600 MHz) data of compounds **9** and **10** (in  $\text{DMSO-}d_6$ )

| No.  | <b>9</b>                   |                                 | <b>10</b>                  |                                 |
|------|----------------------------|---------------------------------|----------------------------|---------------------------------|
|      | $\delta_{\text{C}}$ , type | $\delta_{\text{H}}$ , $J$ in Hz | $\delta_{\text{C}}$ , type | $\delta_{\text{H}}$ , $J$ in Hz |
| 1/1' | 148.9, C                   | —                               | 114.7, C                   | —                               |
| 2/2' | 180.2, C                   | —                               | 127.6, CH                  | 7.05, s                         |
| 3/3' | 103.4, CH                  | 6.37, s                         | 122.9, C                   | —                               |
| 4/4' | 147.4, C                   | —                               | 131.9, CH                  | 7.73, d (8.5)                   |
| 5/5' | 141.9, C                   | —                               | 116.0, CH                  | 6.89, d (8.5)                   |
| 6/6' | 115.9, CH                  | 7.50, d (8.0)                   | 159.7, C                   | —                               |
| OH-6 | —                          | —                               | —                          | 10.31, br s                     |
| 7/7' | 128.8 CH                   | 7.45, td (8.0,1.5)              | 116.0, CH                  | 6.89, d (8.5)                   |
| 8/8' | 125.3, CH                  | 7.38, td (8.0,1.5)              | 131.9, CH                  | 7.73, d (8.5)                   |
| 9    | 128.0, CH                  | 7.70, d (8.0)                   | 172.6, C                   | —                               |
| 10   | 133.7, C                   | —                               | —                          | —                               |
| 11   | 148.2, C                   | —                               | —                          | —                               |
| 12   | 98.3, CH                   | 6.36, s                         | —                          | —                               |

|      |   |            |
|------|---|------------|
| NH-1 | — | 6.83, br s |
|------|---|------------|

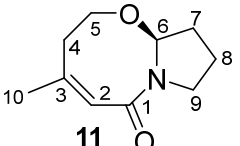

**11**



**12**

**Compounds 11 and 12.**

Table S5.  $^{13}\text{C}$  NMR (150 MHz) and  $^1\text{H}$  NMR (600 MHz) data of compounds **11** and **12** (in  $\text{DMSO-}d_6$ )

| No.  | <b>11</b>                  |                                             | <b>12</b>                  |                                 |
|------|----------------------------|---------------------------------------------|----------------------------|---------------------------------|
|      | $\delta_{\text{C}}$ , type | $\delta_{\text{H}}$ , $J$ in Hz             | $\delta_{\text{C}}$ , type | $\delta_{\text{H}}$ , $J$ in Hz |
| 1    | 166.2, C                   | —                                           | 123.0, C                   | —                               |
| 2    | 121.4, CH                  | 5.73, s                                     | 111.9, CH                  | 7.43, d (1.5)                   |
| 3    | 144.6, C                   | —                                           | 148.3, C                   | —                               |
| 4    | 35.7, $\text{CH}_2$        | 2.35, dd (15.0, 9.5); 2.15, dd (15.0, 7.5); | 152.6, C                   | —                               |
| 5    | 62.5, $\text{CH}_2$        | 3.84, dd (12.0, 7.5); 3.41, dd (12.0, 9.5); | 111.0, CH                  | 7.04, d (8.5)                   |
| 6    | 87.7, CH                   | 5.14, d (4.5)                               | 123.1, CH                  | 7.55, dd (8.5, 1.5)             |
| 7    | 33.6, $\text{CH}_2$        | 1.97, m                                     | 167.1, C                   | —                               |
| 8    | 21.3, $\text{CH}_2$        | 2.15, m; 1.86, m                            | 55.6, $\text{CH}_3$        | 3.82, s                         |
| 9    | 44.5, $\text{CH}_2$        | 3.41, m                                     | 55.4, $\text{CH}_3$        | 3.79, s                         |
| OH-9 | —                          | —                                           | —                          | 12.67, br s                     |
| 10   | 25.0, $\text{CH}_3$        | 1.83, s                                     |                            |                                 |

Table S6. <sup>1</sup>H NMR data of the MTPA esters **1s** and **1r** (600 MHz, in MeOH-*d*<sub>4</sub>, *J* in Hz)

| No. | <i>S</i> -MTPA- <b>1</b> ( <b>1s</b> )                | <i>R</i> -MTPA- <b>1</b> ( <b>1r</b> )                | $\Delta\delta_{S-R}$ |
|-----|-------------------------------------------------------|-------------------------------------------------------|----------------------|
| 1   | 3.77, 1H, dd (11.8, 1.6);<br>3.61, 1H, dd (11.8, 2.0) | 3.76, 1H, dd (12.0, 1.8);<br>3.61, 1H, dd (12.0, 2.3) | +0.01;<br>0          |
| 2   | 2.31, 1H, m                                           | 2.31, 1H, m                                           | 0                    |
| 3   | 3.45, 1H, dd (9.7, 5.5)                               | 3.45, 1H, dd (9.8, 5.4)                               | 0                    |
| 4   | 5.0, 1H, t (9.7)                                      | 5.0, 1H, t (9.8)                                      | 0                    |
| 5   | 3.57, 1H, d (9.7)                                     | 3.57, 1H, d (9.8)                                     | 0                    |
| 7   | 6.05, 1H, d (10.1)                                    | 6.05, 1H, d (10.1)                                    | 0                    |
| 8   | 6.31, 1H, dd (14.9, 10.1)                             | 6.31, 1H, dd (14.9, 10.1)                             | 0                    |
| 9   | 6.26, 1H, dd (14.9, 10.1)                             | 6.26, 1H, dd (14.9, 9.9)                              | 0                    |
| 10  | 6.12, 1H, dd (14.9, 10.1)                             | 6.13, 1H, dd (14.9, 9.9)                              | −0.01                |
| 11  | 5.72, 1H, m                                           | 5.72, 1H, m                                           | 0                    |
| 12  | 2.08, 2H, m                                           | 2.08, 2H, m                                           | 0                    |
| 13  | 1.42, 2H, m                                           | 1.42, 2H, m                                           | 0                    |
| 14  | 0.91, 3H, t (7.5)                                     | 0.90, 3H, t (7.3)                                     | +0.01                |
| 15  | 1.06, 3H, d (7.3)                                     | 1.05, 3H, d (7.2)                                     | +0.01                |
| 16  | 1.72, 3H, s                                           | 1.72, 3H, s                                           | 0                    |
| 17  | 3.34, 3H, s                                           | 3.34, 3H, s                                           | 0                    |
| 19  | 3.75, 1H, d (17.8);<br>3.64, 1H, d (17.8)             | 3.75, 1H, d (18.0);<br>3.64, 1H, d (18.0)             | 0;<br>0              |
| 21  | 5.52, 1H, s                                           | 5.51, 1H, s                                           | +0.01                |
| 26  | 6.15, 1H, s                                           | 6.13, 1H, s                                           | +0.02                |
| 27  | 1.57, 3H, s                                           | 1.49, 3H, s                                           | +0.08                |
| 28  | 1.84, 1H, m; 1.07, 1H, m                              | 2.01, 1H, m; 1.17, 1H, m                              | −0.17; −0.10         |
| 29  | 1.68, 1H, s                                           | 1.74, 1H, s                                           | −0.06                |
| 31  | 2.56, 1H, dd (13.7, 8.7);<br>2.36, 1H, dd (13.7, 5.3) | 2.55, 1H, dd (12.7, 9.2);<br>2.35, 1H, dd (12.7, 5.0) | +0.01;<br>+0.01;     |
| 32  | 5.40, 1H, m                                           | 5.37, 1H, m                                           | +0.03                |
| 33  | 5.31, 1H, d (15.8)                                    | 5.30, 1H, d (15.9)                                    | +0.01                |
| 35  | 2.30, 1H, m; 1.84, 1H, m                              | 2.26, 1H, m; 1.82, 1H, m                              | +0.04; +0.02         |
| 36  | 5.62, 1H, dd (11.7, 5.6)                              | 5.52, 1H, m                                           | +0.10                |
| 38  | 5.95, 1H, dd (8.7, 4.5)                               | 5.92, 1H, dd (7.0, 4.9)                               | +0.03                |
| 39  | 1.93, 1H, m; 1.49, 1H, m                              | 2.10, 1H, m; 1.57, 1H, m                              | −0.17; −0.08         |
| 40  | 1.14, 3H, s                                           | 1.14, 3H, s                                           | 0                    |
| 41  | 1.08, 3H, s                                           | 1.07, 3H, s                                           | +0.01                |
| 42  | 1.17, 3H, s                                           | 1.16, 3H, s                                           | +0.01                |
| 43  | 1.72, 3H, s                                           | 1.47, 3H, s                                           | +0.25                |

Table S7. Gibbs free energies <sup>a</sup> and equilibrium populations <sup>b</sup> of low-energy conformers of **1f**

| Conformers            | In MeOH       |        |
|-----------------------|---------------|--------|
|                       | G             | P (%)  |
| <b>1f<sub>1</sub></b> | −2331.8990733 | 4.68%  |
| <b>1f<sub>2</sub></b> | −2331.9018169 | 85.83% |
| <b>1f<sub>3</sub></b> | −2331.8987215 | 3.23%  |
| <b>1f<sub>4</sub></b> | −2331.8993469 | 6.26%  |

<sup>a</sup> B3LYP/6-31+g (d, p), in kcal/mol; <sup>b</sup> from G values at 298.15K.Table S8. Cartesian coordinates for the low-energy reoptimized MMFF conformers of **1f** at B3LYP/6-31+g (d, p) level of theory in MeOH

| <b>1f<sub>1</sub></b> |      |      | Standard Orientation (Ångstroms) |          |          |
|-----------------------|------|------|----------------------------------|----------|----------|
| No.                   | Atom | Type | X                                | Y        | Z        |
| 1                     | 6    | 0    | −2.30701                         | −0.26853 | −0.06643 |
| 2                     | 6    | 0    | −1.59497                         | −1.67937 | 0.011689 |
| 3                     | 6    | 0    | 7.307088                         | −1.25419 | −1.61492 |
| 4                     | 6    | 0    | 6.577708                         | −1.09903 | −0.26478 |
| 5                     | 6    | 0    | 5.07293                          | −0.79104 | −0.47072 |
| 6                     | 6    | 0    | 4.887612                         | 0.372162 | −1.47615 |
| 7                     | 8    | 0    | 5.598273                         | 0.100404 | −2.69658 |
| 8                     | 6    | 0    | 7.00131                          | −0.0386  | −2.49042 |
| 9                     | 6    | 0    | 3.431728                         | 0.637073 | −1.8533  |
| 10                    | 6    | 0    | 2.833765                         | 1.773732 | −1.43637 |
| 11                    | 6    | 0    | 1.499428                         | 2.226148 | −1.76437 |
| 12                    | 6    | 0    | 0.925906                         | 3.286658 | −1.17475 |
| 13                    | 6    | 0    | −0.4111                          | 3.73047  | −1.49997 |
| 14                    | 6    | 0    | −1.03526                         | 4.707811 | −0.82611 |
| 15                    | 6    | 0    | −2.43409                         | 5.164415 | −1.12649 |
| 16                    | 6    | 0    | −3.36255                         | 4.910654 | 0.061624 |
| 17                    | 6    | 0    | 6.943883                         | −2.55534 | −2.3415  |
| 18                    | 8    | 0    | 6.688968                         | −2.27866 | 0.550435 |
| 19                    | 8    | 0    | 4.387595                         | −0.60201 | 0.796305 |
| 20                    | 6    | 0    | −4.78219                         | 5.368092 | −0.23375 |
| 21                    | 8    | 0    | −0.3523                          | −1.61973 | 0.757401 |
| 22                    | 6    | 0    | −1.38709                         | 0.829915 | 0.509381 |
| 23                    | 6    | 0    | 7.965575                         | −2.43358 | 1.156315 |
| 24                    | 6    | 0    | 1.112518                         | −0.76112 | 2.363238 |
| 25                    | 6    | 0    | 1.523993                         | 0.493949 | 2.537243 |
| 26                    | 6    | 0    | −0.33183                         | −0.91416 | 1.990936 |
| 27                    | 6    | 0    | −0.89027                         | 0.511283 | 1.907461 |
| 28                    | 6    | 0    | 0.323834                         | 1.342743 | 2.271844 |
| 29                    | 8    | 0    | −0.9868                          | −1.61095 | 3.073625 |
| 30                    | 6    | 0    | −1.88223                         | −0.69308 | 3.589118 |

|    |   |   |          |          |          |
|----|---|---|----------|----------|----------|
| 31 | 6 | 0 | -1.91065 | 0.500129 | 3.002162 |
| 32 | 8 | 0 | 0.355875 | 2.566304 | 2.354818 |
| 33 | 6 | 0 | -2.77117 | 1.662146 | 3.33811  |
| 34 | 6 | 0 | -1.10635 | -2.18999 | -1.35862 |
| 35 | 1 | 0 | -3.19929 | -0.29772 | 0.571272 |
| 36 | 6 | 0 | -2.4831  | -2.77691 | 0.67795  |
| 37 | 6 | 0 | -3.71617 | -3.20225 | -0.06762 |
| 38 | 6 | 0 | -5.3475  | 0.069279 | -1.32085 |
| 39 | 6 | 0 | -4.06831 | -0.32042 | -2.04365 |
| 40 | 6 | 0 | -2.75479 | 0.234481 | -1.46854 |
| 41 | 6 | 0 | -4.95787 | -2.936   | 0.370752 |
| 42 | 6 | 0 | -6.25922 | -3.25098 | -0.35626 |
| 43 | 6 | 0 | -6.48898 | -2.22348 | -1.50237 |
| 44 | 6 | 0 | -6.37902 | -0.7729  | -1.09118 |
| 45 | 6 | 0 | -7.41889 | -3.18692 | 0.660861 |
| 46 | 6 | 0 | -6.25104 | -4.67123 | -0.95906 |
| 47 | 8 | 0 | -4.18031 | 0.19382  | -3.37557 |
| 48 | 6 | 0 | -5.46188 | 1.510216 | -0.88644 |
| 49 | 6 | 0 | 4.00702  | 0.358688 | 2.930247 |
| 50 | 6 | 0 | 4.735675 | 0.437682 | 1.597393 |
| 51 | 7 | 0 | 2.722677 | 1.042006 | 2.902699 |
| 52 | 8 | 0 | 5.525767 | 1.32544  | 1.299705 |
| 53 | 6 | 0 | 2.776955 | -0.41884 | -2.70942 |
| 54 | 1 | 0 | 8.388681 | -1.28313 | -1.43522 |
| 55 | 1 | 0 | 7.040052 | -0.26963 | 0.28295  |
| 56 | 1 | 0 | 4.618279 | -1.69955 | -0.88195 |
| 57 | 1 | 0 | 5.312171 | 1.296067 | -1.06718 |
| 58 | 1 | 0 | 7.471786 | -0.1481  | -3.47335 |
| 59 | 1 | 0 | 7.39842  | 0.88132  | -2.04415 |
| 60 | 1 | 0 | 3.402752 | 2.455307 | -0.80217 |
| 61 | 1 | 0 | 0.947295 | 1.68349  | -2.52567 |
| 62 | 1 | 0 | 1.454346 | 3.834807 | -0.39683 |
| 63 | 1 | 0 | -0.92462 | 3.223137 | -2.31456 |
| 64 | 1 | 0 | -0.52985 | 5.208964 | -0.00225 |
| 65 | 1 | 0 | -2.82628 | 4.655819 | -2.01575 |
| 66 | 1 | 0 | -2.40866 | 6.235854 | -1.35778 |
| 67 | 1 | 0 | -2.99321 | 5.439079 | 0.94894  |
| 68 | 1 | 0 | -3.37496 | 3.842357 | 0.307343 |
| 69 | 1 | 0 | 5.879127 | -2.60974 | -2.58749 |
| 70 | 1 | 0 | 7.503453 | -2.63545 | -3.28008 |
| 71 | 1 | 0 | 7.197218 | -3.4309  | -1.73555 |
| 72 | 1 | 0 | -4.81244 | 6.442187 | -0.44247 |
| 73 | 1 | 0 | -5.43049 | 5.17018  | 0.625702 |
| 74 | 1 | 0 | -5.19388 | 4.838197 | -1.09854 |

| 75                    | 1    | 0    | -1.90703                         | 1.795666 | 0.518146 |
|-----------------------|------|------|----------------------------------|----------|----------|
| 76                    | 1    | 0    | -0.53105                         | 0.949611 | -0.16438 |
| 77                    | 1    | 0    | 8.207101                         | -1.56382 | 1.774712 |
| 78                    | 1    | 0    | 7.931265                         | -3.31644 | 1.800495 |
| 79                    | 1    | 0    | 8.741481                         | -2.59044 | 0.402782 |
| 80                    | 1    | 0    | 1.740906                         | -1.63025 | 2.489374 |
| 81                    | 1    | 0    | -2.47051                         | -1.05601 | 4.416633 |
| 82                    | 1    | 0    | -3.40812                         | 1.928907 | 2.489284 |
| 83                    | 1    | 0    | -3.42522                         | 1.440316 | 4.187813 |
| 84                    | 1    | 0    | -2.16323                         | 2.531867 | 3.603791 |
| 85                    | 1    | 0    | -0.36687                         | -1.50304 | -1.78678 |
| 86                    | 1    | 0    | -0.58687                         | -3.15034 | -1.24896 |
| 87                    | 1    | 0    | -1.91117                         | -2.33205 | -2.08281 |
| 88                    | 1    | 0    | -1.87098                         | -3.6724  | 0.853423 |
| 89                    | 1    | 0    | -2.77931                         | -2.44995 | 1.678359 |
| 90                    | 1    | 0    | -3.56372                         | -3.74023 | -0.99926 |
| 91                    | 1    | 0    | -3.97237                         | -1.40075 | -2.14522 |
| 92                    | 1    | 0    | -2.84897                         | 1.32963  | -1.44692 |
| 93                    | 1    | 0    | -1.95019                         | 0.084535 | -2.19948 |
| 94                    | 1    | 0    | -5.06079                         | -2.37076 | 1.298019 |
| 95                    | 1    | 0    | -5.80654                         | -2.43551 | -2.33387 |
| 96                    | 1    | 0    | -7.49234                         | -2.36988 | -1.92582 |
| 97                    | 1    | 0    | -7.25592                         | -0.39159 | -0.56811 |
| 98                    | 1    | 0    | -8.38217                         | -3.37715 | 0.173715 |
| 99                    | 1    | 0    | -7.2939                          | -3.93706 | 1.451082 |
| 100                   | 1    | 0    | -7.48469                         | -2.20775 | 1.148926 |
| 101                   | 1    | 0    | -7.22373                         | -4.9138  | -1.40288 |
| 102                   | 1    | 0    | -6.03781                         | -5.42711 | -0.1942  |
| 103                   | 1    | 0    | -5.50171                         | -4.77743 | -1.75125 |
| 104                   | 1    | 0    | -5.06694                         | -0.0508  | -3.692   |
| 105                   | 1    | 0    | -6.46654                         | 1.756019 | -0.52546 |
| 106                   | 1    | 0    | -4.7629                          | 1.72312  | -0.07213 |
| 107                   | 1    | 0    | -5.24656                         | 2.18251  | -1.72323 |
| 108                   | 1    | 0    | 4.647993                         | 0.833442 | 3.681943 |
| 109                   | 1    | 0    | 3.911177                         | -0.68905 | 3.237154 |
| 110                   | 1    | 0    | 2.757952                         | 2.053134 | 2.754502 |
| 111                   | 1    | 0    | 2.848579                         | -1.40131 | -2.23339 |
| 112                   | 1    | 0    | 3.262483                         | -0.47327 | -3.68902 |
| 113                   | 1    | 0    | 1.713504                         | -0.24268 | -2.88396 |
| <b>1f<sub>2</sub></b> |      |      | Standard Orientation (Ångstroms) |          |          |
| No.                   | Atom | Type | X                                | Y        | Z        |
| 1                     | 6    | 0    | 3.002836                         | -1.60985 | -0.78375 |
| 2                     | 6    | 0    | 2.834866                         | -0.08376 | -1.16806 |



|    |   |   |          |          |          |
|----|---|---|----------|----------|----------|
| 3  | 6 | 0 | -7.85167 | -0.34681 | 1.334772 |
| 4  | 6 | 0 | -6.94911 | -0.69333 | 0.129844 |
| 5  | 6 | 0 | -5.46998 | -0.36168 | 0.434768 |
| 6  | 6 | 0 | -5.34666 | 1.088019 | 0.96649  |
| 7  | 8 | 0 | -6.19415 | 1.271176 | 2.111042 |
| 8  | 6 | 0 | -7.57224 | 1.088776 | 1.787797 |
| 9  | 6 | 0 | -3.92065 | 1.457523 | 1.362822 |
| 10 | 6 | 0 | -3.26916 | 2.417424 | 0.671346 |
| 11 | 6 | 0 | -1.89401 | 2.829088 | 0.845619 |
| 12 | 6 | 0 | -1.28985 | 3.724222 | 0.048704 |
| 13 | 6 | 0 | 0.112946 | 4.048031 | 0.179087 |
| 14 | 6 | 0 | 0.74804  | 4.90911  | -0.62974 |
| 15 | 6 | 0 | 2.215853 | 5.212447 | -0.52122 |
| 16 | 6 | 0 | 2.958832 | 4.79786  | -1.7916  |
| 17 | 6 | 0 | -7.68229 | -1.32475 | 2.505087 |
| 18 | 8 | 0 | -7.0379  | -2.08306 | -0.22585 |
| 19 | 8 | 0 | -4.595   | -0.65569 | -0.68557 |
| 20 | 6 | 0 | 4.456238 | 5.027558 | -1.66091 |
| 21 | 8 | 0 | 1.469765 | 0.228098 | -1.53955 |
| 22 | 6 | 0 | 1.704323 | -2.39483 | -1.09448 |
| 23 | 6 | 0 | -8.22184 | -2.41188 | -0.94033 |
| 24 | 6 | 0 | -0.84496 | -0.0378  | -1.50609 |
| 25 | 6 | 0 | -1.55481 | -1.13672 | -1.75677 |
| 26 | 6 | 0 | 0.413843 | -0.25645 | -0.72044 |
| 27 | 6 | 0 | 0.478202 | -1.76456 | -0.45042 |
| 28 | 6 | 0 | -0.80591 | -2.24678 | -1.09241 |
| 29 | 8 | 0 | 0.285121 | 0.435271 | 0.538547 |
| 30 | 6 | 0 | 0.284491 | -0.56229 | 1.492953 |
| 31 | 6 | 0 | 0.400433 | -1.80825 | 1.044228 |
| 32 | 8 | 0 | -1.21545 | -3.40293 | -1.0816  |
| 33 | 6 | 0 | 0.435554 | -3.06139 | 1.83905  |
| 34 | 6 | 0 | 3.59897  | 0.308703 | -2.44836 |
| 35 | 1 | 0 | 3.154818 | -1.67327 | 0.301014 |
| 36 | 6 | 0 | 3.233103 | 0.890325 | -0.01464 |
| 37 | 6 | 0 | 4.688027 | 0.959995 | 0.350422 |
| 38 | 6 | 0 | 5.837315 | -2.7286  | 0.512369 |
| 39 | 6 | 0 | 5.582312 | -2.20634 | -0.89246 |
| 40 | 6 | 0 | 4.163614 | -2.3957  | -1.45684 |
| 41 | 6 | 0 | 5.161772 | 0.510956 | 1.524414 |
| 42 | 6 | 0 | 6.624134 | 0.450577 | 1.946311 |
| 43 | 6 | 0 | 7.315273 | -0.7729  | 1.277126 |
| 44 | 6 | 0 | 6.584751 | -2.08713 | 1.437951 |
| 45 | 6 | 0 | 6.687126 | 0.326716 | 3.483717 |

|    |   |   |          |          |          |
|----|---|---|----------|----------|----------|
| 46 | 6 | 0 | 7.391901 | 1.729802 | 1.553146 |
| 47 | 8 | 0 | 6.466175 | -2.9246  | -1.7606  |
| 48 | 6 | 0 | 5.2475   | -4.07737 | 0.846326 |
| 49 | 6 | 0 | -3.67627 | -0.3595  | -2.88312 |
| 50 | 6 | 0 | -4.68408 | 0.076357 | -1.82338 |
| 51 | 7 | 0 | -2.71766 | -1.37219 | -2.44204 |
| 52 | 8 | 0 | -5.49381 | 0.979391 | -2.00799 |
| 53 | 6 | 0 | -3.33787 | 0.671002 | 2.509543 |
| 54 | 1 | 0 | -8.90115 | -0.40875 | 1.022104 |
| 55 | 1 | 0 | -7.27567 | -0.10178 | -0.73354 |
| 56 | 1 | 0 | -5.14086 | -1.05869 | 1.214891 |
| 57 | 1 | 0 | -5.69035 | 1.799116 | 0.206498 |
| 58 | 1 | 0 | -8.15664 | 1.327972 | 2.68269  |
| 59 | 1 | 0 | -7.86266 | 1.809083 | 1.013237 |
| 60 | 1 | 0 | -3.79809 | 2.922414 | -0.13805 |
| 61 | 1 | 0 | -1.31499 | 2.351133 | 1.6295   |
| 62 | 1 | 0 | -1.84168 | 4.209254 | -0.7529  |
| 63 | 1 | 0 | 0.670772 | 3.533567 | 0.959992 |
| 64 | 1 | 0 | 0.203354 | 5.424082 | -1.41811 |
| 65 | 1 | 0 | 2.653468 | 4.701563 | 0.345423 |
| 66 | 1 | 0 | 2.339918 | 6.288498 | -0.35158 |
| 67 | 1 | 0 | 2.581162 | 5.367351 | -2.64954 |
| 68 | 1 | 0 | 2.777713 | 3.738221 | -2.00666 |
| 69 | 1 | 0 | -6.66539 | -1.31559 | 2.908944 |
| 70 | 1 | 0 | -8.36338 | -1.06135 | 3.321896 |
| 71 | 1 | 0 | -7.91874 | -2.34968 | 2.202432 |
| 72 | 1 | 0 | 4.67647  | 6.083456 | -1.47468 |
| 73 | 1 | 0 | 4.966847 | 4.730494 | -2.58224 |
| 74 | 1 | 0 | 4.87279  | 4.438102 | -0.83768 |
| 75 | 1 | 0 | 1.800865 | -3.43485 | -0.75599 |
| 76 | 1 | 0 | 1.570108 | -2.44859 | -2.18431 |
| 77 | 1 | 0 | -9.10973 | -2.25371 | -0.32297 |
| 78 | 1 | 0 | -8.29093 | -1.8256  | -1.86148 |
| 79 | 1 | 0 | -8.17479 | -3.47106 | -1.20778 |
| 80 | 1 | 0 | -1.11396 | 0.952943 | -1.84082 |
| 81 | 1 | 0 | 0.196023 | -0.21296 | 2.509091 |
| 82 | 1 | 0 | 1.380271 | -3.59083 | 1.682995 |
| 83 | 1 | 0 | 0.343198 | -2.85526 | 2.910503 |
| 84 | 1 | 0 | -0.38679 | -3.72462 | 1.55595  |
| 85 | 1 | 0 | 3.233106 | -0.26386 | -3.30896 |
| 86 | 1 | 0 | 3.41818  | 1.361732 | -2.69758 |
| 87 | 1 | 0 | 4.679287 | 0.170118 | -2.37152 |
| 88 | 1 | 0 | 2.9047   | 1.905089 | -0.27557 |

| 89                    | 1    | 0    | 2.66315                          | 0.644078 | 0.885218 |
|-----------------------|------|------|----------------------------------|----------|----------|
| 90                    | 1    | 0    | 5.359175                         | 1.387343 | -0.38948 |
| 91                    | 1    | 0    | 5.854636                         | -1.15601 | -0.98851 |
| 92                    | 1    | 0    | 3.94047                          | -3.4715  | -1.41926 |
| 93                    | 1    | 0    | 4.177594                         | -2.1971  | -2.53591 |
| 94                    | 1    | 0    | 4.452491                         | 0.06535  | 2.223221 |
| 95                    | 1    | 0    | 7.49156                          | -0.56478 | 0.215217 |
| 96                    | 1    | 0    | 8.320141                         | -0.90063 | 1.702865 |
| 97                    | 1    | 0    | 6.713087                         | -2.55015 | 2.416233 |
| 98                    | 1    | 0    | 7.723735                         | 0.249139 | 3.831338 |
| 99                    | 1    | 0    | 6.239731                         | 1.202113 | 3.969722 |
| 100                   | 1    | 0    | 6.151296                         | -0.55743 | 3.847536 |
| 101                   | 1    | 0    | 8.417542                         | 1.705249 | 1.939894 |
| 102                   | 1    | 0    | 6.906251                         | 2.625714 | 1.957488 |
| 103                   | 1    | 0    | 7.462004                         | 1.84993  | 0.466398 |
| 104                   | 1    | 0    | 7.339376                         | -2.91981 | -1.33207 |
| 105                   | 1    | 0    | 5.596435                         | -4.45343 | 1.814284 |
| 106                   | 1    | 0    | 4.155723                         | -4.02094 | 0.894244 |
| 107                   | 1    | 0    | 5.530935                         | -4.81775 | 0.091301 |
| 108                   | 1    | 0    | -3.14837                         | 0.53036  | -3.24189 |
| 109                   | 1    | 0    | -4.24937                         | -0.78013 | -3.71597 |
| 110                   | 1    | 0    | -3.14064                         | -2.2623  | -2.16396 |
| 111                   | 1    | 0    | -3.08758                         | -0.34407 | 2.185931 |
| 112                   | 1    | 0    | -4.05219                         | 0.602283 | 3.336379 |
| 113                   | 1    | 0    | -2.43429                         | 1.119923 | 2.927994 |
| <b>1f<sub>3</sub></b> |      |      | Standard Orientation (Ångstroms) |          |          |
| No.                   | Atom | Type | X                                | Y        | Z        |
| 1                     | 6    | 0    | -3.17301                         | -0.67833 | -0.85887 |
| 2                     | 6    | 0    | -3.35083                         | -2.22301 | -1.1568  |
| 3                     | 6    | 0    | 7.675261                         | -0.9892  | 1.656543 |
| 4                     | 6    | 0    | 6.832572                         | -1.27717 | 0.399147 |
| 5                     | 6    | 0    | 6.067083                         | -0.01478 | -0.07085 |
| 6                     | 6    | 0    | 5.346686                         | 0.68975  | 1.106877 |
| 7                     | 8    | 0    | 6.232094                         | 0.882105 | 2.222277 |
| 8                     | 6    | 0    | 6.778844                         | -0.33865 | 2.709193 |
| 9                     | 6    | 0    | 4.801571                         | 2.067262 | 0.726293 |
| 10                    | 6    | 0    | 3.481803                         | 2.219504 | 0.490323 |
| 11                    | 6    | 0    | 2.778438                         | 3.446457 | 0.176692 |
| 12                    | 6    | 0    | 1.478968                         | 3.458614 | -0.15963 |
| 13                    | 6    | 0    | 0.740201                         | 4.665313 | -0.45233 |
| 14                    | 6    | 0    | -0.55458                         | 4.650111 | -0.80409 |
| 15                    | 6    | 0    | -1.35213                         | 5.883972 | -1.11615 |
| 16                    | 6    | 0    | -2.5256                          | 6.041235 | -0.14878 |

|    |   |   |          |          |          |
|----|---|---|----------|----------|----------|
| 17 | 6 | 0 | 8.903564 | -0.11871 | 1.364963 |
| 18 | 8 | 0 | 7.639061 | -1.74619 | -0.69644 |
| 19 | 8 | 0 | 5.1889   | -0.29783 | -1.19673 |
| 20 | 6 | 0 | -3.34959 | 7.278133 | -0.47012 |
| 21 | 8 | 0 | -2.08887 | -2.86025 | -1.48494 |
| 22 | 6 | 0 | -1.72782 | -0.22815 | -1.16768 |
| 23 | 6 | 0 | 8.042539 | -3.10294 | -0.56451 |
| 24 | 6 | 0 | 0.237165 | -3.10883 | -1.41069 |
| 25 | 6 | 0 | 1.178836 | -2.20767 | -1.69277 |
| 26 | 6 | 0 | -0.95644 | -2.58384 | -0.67084 |
| 27 | 6 | 0 | -0.68792 | -1.08979 | -0.46812 |
| 28 | 6 | 0 | 0.671021 | -0.92536 | -1.11554 |
| 29 | 8 | 0 | -0.98845 | -3.2371  | 0.615956 |
| 30 | 6 | 0 | -0.77913 | -2.22006 | 1.52718  |
| 31 | 6 | 0 | -0.61721 | -0.99912 | 1.024864 |
| 32 | 8 | 0 | 1.289787 | 0.131682 | -1.1633  |
| 33 | 6 | 0 | -0.38745 | 0.262651 | 1.771987 |
| 34 | 6 | 0 | -4.17944 | -2.50573 | -2.42588 |
| 35 | 1 | 0 | -3.32531 | -0.5184  | 0.215819 |
| 36 | 6 | 0 | -3.97471 | -3.00873 | 0.040139 |
| 37 | 6 | 0 | -5.3965  | -2.68456 | 0.402516 |
| 38 | 6 | 0 | -5.64575 | 1.175262 | 0.303417 |
| 39 | 6 | 0 | -5.53063 | 0.508466 | -1.05774 |
| 40 | 6 | 0 | -4.10878 | 0.311303 | -1.60983 |
| 41 | 6 | 0 | -5.73016 | -2.06834 | 1.548845 |
| 42 | 6 | 0 | -7.12784 | -1.62598 | 1.963639 |
| 43 | 6 | 0 | -7.52359 | -0.3294  | 1.199368 |
| 44 | 6 | 0 | -6.50931 | 0.789583 | 1.268622 |
| 45 | 6 | 0 | -7.13206 | -1.37216 | 3.48647  |
| 46 | 6 | 0 | -8.18331 | -2.71339 | 1.673261 |
| 47 | 8 | 0 | -6.21687 | 1.355179 | -1.98628 |
| 48 | 6 | 0 | -4.75992 | 2.374502 | 0.542275 |
| 49 | 6 | 0 | 3.457877 | -1.37419 | -2.38912 |
| 50 | 6 | 0 | 4.166521 | -1.18646 | -1.04704 |
| 51 | 7 | 0 | 2.377244 | -2.37176 | -2.34468 |
| 52 | 8 | 0 | 3.893331 | -1.76887 | -0.00436 |
| 53 | 6 | 0 | 5.818459 | 3.178918 | 0.655538 |
| 54 | 1 | 0 | 8.046957 | -1.93807 | 2.062029 |
| 55 | 1 | 0 | 6.116419 | -2.06733 | 0.647136 |
| 56 | 1 | 0 | 6.815921 | 0.667301 | -0.49098 |
| 57 | 1 | 0 | 4.514178 | 0.073411 | 1.465989 |
| 58 | 1 | 0 | 7.35696  | -0.10671 | 3.610084 |

|     |   |   |          |          |          |
|-----|---|---|----------|----------|----------|
| 59  | 1 | 0 | 5.966004 | -1.01026 | 3.011185 |
| 60  | 1 | 0 | 2.846686 | 1.334517 | 0.548665 |
| 61  | 1 | 0 | 3.323913 | 4.382751 | 0.235109 |
| 62  | 1 | 0 | 0.931687 | 2.521009 | -0.22935 |
| 63  | 1 | 0 | 1.272392 | 5.611    | -0.37654 |
| 64  | 1 | 0 | -1.08326 | 3.702638 | -0.89014 |
| 65  | 1 | 0 | -1.72566 | 5.804521 | -2.14409 |
| 66  | 1 | 0 | -0.71781 | 6.777896 | -1.07594 |
| 67  | 1 | 0 | -2.15619 | 6.113925 | 0.881371 |
| 68  | 1 | 0 | -3.17392 | 5.158057 | -0.19604 |
| 69  | 1 | 0 | 8.631334 | 0.862018 | 0.963122 |
| 70  | 1 | 0 | 9.478032 | 0.048114 | 2.282756 |
| 71  | 1 | 0 | 9.570632 | -0.60555 | 0.646511 |
| 72  | 1 | 0 | -2.74101 | 8.185044 | -0.39682 |
| 73  | 1 | 0 | -4.18353 | 7.370945 | 0.232626 |
| 74  | 1 | 0 | -3.76294 | 7.221862 | -1.48227 |
| 75  | 1 | 0 | -1.58798 | 0.821491 | -0.87667 |
| 76  | 1 | 0 | -1.56921 | -0.25741 | -2.25538 |
| 77  | 1 | 0 | 8.699771 | -3.23517 | 0.298625 |
| 78  | 1 | 0 | 7.170209 | -3.75813 | -0.48148 |
| 79  | 1 | 0 | 8.598814 | -3.38112 | -1.4638  |
| 80  | 1 | 0 | 0.299111 | -4.15176 | -1.68506 |
| 81  | 1 | 0 | -0.7766  | -2.53467 | 2.558602 |
| 82  | 1 | 0 | -1.16702 | 0.995765 | 1.544328 |
| 83  | 1 | 0 | -0.39804 | 0.092179 | 2.853532 |
| 84  | 1 | 0 | 0.583574 | 0.692704 | 1.514004 |
| 85  | 1 | 0 | -3.68772 | -2.08644 | -3.31173 |
| 86  | 1 | 0 | -4.24582 | -3.58556 | -2.60967 |
| 87  | 1 | 0 | -5.1989  | -2.11739 | -2.37536 |
| 88  | 1 | 0 | -3.91829 | -4.08538 | -0.17208 |
| 89  | 1 | 0 | -3.35416 | -2.87437 | 0.929667 |
| 90  | 1 | 0 | -6.16196 | -2.96762 | -0.31483 |
| 91  | 1 | 0 | -6.04736 | -0.45018 | -1.08574 |
| 92  | 1 | 0 | -3.63471 | 1.302721 | -1.64494 |
| 93  | 1 | 0 | -4.16932 | 0.04475  | -2.67239 |
| 94  | 1 | 0 | -4.92493 | -1.7803  | 2.226031 |
| 95  | 1 | 0 | -7.75369 | -0.5696  | 0.154771 |
| 96  | 1 | 0 | -8.46783 | 0.05796  | 1.606542 |
| 97  | 1 | 0 | -6.51766 | 1.339228 | 2.209821 |
| 98  | 1 | 0 | -8.11356 | -1.02138 | 3.825428 |
| 99  | 1 | 0 | -6.8989  | -2.28929 | 4.040927 |
| 100 | 1 | 0 | -6.39342 | -0.61757 | 3.779909 |

|     |   |   |          |          |          |
|-----|---|---|----------|----------|----------|
| 101 | 1 | 0 | -9.16713 | -2.41583 | 2.054713 |
| 102 | 1 | 0 | -7.91663 | -3.66425 | 2.149316 |
| 103 | 1 | 0 | -8.29818 | -2.89855 | 0.599513 |
| 104 | 1 | 0 | -7.06786 | 1.584183 | -1.57427 |
| 105 | 1 | 0 | -3.70925 | 2.074576 | 0.602784 |
| 106 | 1 | 0 | -4.87388 | 3.102223 | -0.26767 |
| 107 | 1 | 0 | -5.00491 | 2.890857 | 1.476838 |
| 108 | 1 | 0 | 4.204476 | -1.73126 | -3.10717 |
| 109 | 1 | 0 | 3.081016 | -0.41146 | -2.74704 |
| 110 | 1 | 0 | 2.707113 | -3.33379 | -2.33225 |
| 111 | 1 | 0 | 6.696532 | 2.866472 | 0.082188 |
| 112 | 1 | 0 | 6.147019 | 3.458243 | 1.661804 |
| 113 | 1 | 0 | 5.440935 | 4.080013 | 0.166548 |

| <b>1f<sub>4</sub></b> |      |      | Standard Orientation (Ångstroms) |          |          |
|-----------------------|------|------|----------------------------------|----------|----------|
| No.                   | Atom | Type | X                                | Y        | Z        |
| 1                     | 6    | 0    | -3.45874                         | -0.75062 | 0.67773  |
| 2                     | 6    | 0    | -3.43494                         | 0.630085 | -0.09532 |
| 3                     | 6    | 0    | 8.994198                         | -1.0538  | 1.077606 |
| 4                     | 6    | 0    | 7.633688                         | -1.67753 | 0.713967 |
| 5                     | 6    | 0    | 6.679907                         | -0.6396  | 0.084817 |
| 6                     | 6    | 0    | 6.631587                         | 0.630763 | 0.972302 |
| 7                     | 8    | 0    | 7.942254                         | 1.133322 | 1.258025 |
| 8                     | 6    | 0    | 8.758183                         | 0.186053 | 1.938852 |
| 9                     | 6    | 0    | 5.824425                         | 1.762488 | 0.34072  |
| 10                    | 6    | 0    | 4.543856                         | 1.961282 | 0.720306 |
| 11                    | 6    | 0    | 3.6189                           | 2.939171 | 0.189233 |
| 12                    | 6    | 0    | 2.303508                         | 2.897733 | 0.452196 |
| 13                    | 6    | 0    | 1.359644                         | 3.842485 | -0.09957 |
| 14                    | 6    | 0    | 0.038083                         | 3.750068 | 0.110297 |
| 15                    | 6    | 0    | -0.97092                         | 4.698067 | -0.47093 |
| 16                    | 6    | 0    | -1.71139                         | 5.460287 | 0.627852 |
| 17                    | 6    | 0    | 9.836153                         | -0.70912 | -0.15727 |
| 18                    | 8    | 0    | 7.777014                         | -2.7717  | -0.20768 |
| 19                    | 8    | 0    | 5.360805                         | -1.24352 | 0.039675 |
| 20                    | 6    | 0    | -2.77448                         | 6.378809 | 0.046291 |
| 21                    | 8    | 0    | -2.14369                         | 0.882822 | -0.70537 |
| 22                    | 6    | 0    | -2.04533                         | -1.37751 | 0.715579 |
| 23                    | 6    | 0    | 8.236479                         | -3.97235 | 0.397989 |
| 24                    | 6    | 0    | -0.1073                          | 0.266504 | -1.67731 |
| 25                    | 6    | 0    | 0.830439                         | -0.55719 | -1.20934 |
| 26                    | 6    | 0    | -1.52118                         | -0.16544 | -1.43797 |
| 27                    | 6    | 0    | -1.42046                         | -1.48659 | -0.66737 |
| 28                    | 6    | 0    | 0.080116                         | -1.68783 | -0.57891 |

|    |   |   |          |          |          |
|----|---|---|----------|----------|----------|
| 29 | 8 | 0 | -2.12203 | -0.41709 | -2.72642 |
| 30 | 6 | 0 | -2.39097 | -1.77254 | -2.72714 |
| 31 | 6 | 0 | -2.05493 | -2.44323 | -1.62885 |
| 32 | 8 | 0 | 0.621813 | -2.65607 | -0.0554  |
| 33 | 6 | 0 | -2.23715 | -3.89098 | -1.35656 |
| 34 | 6 | 0 | -3.5829  | 1.850835 | 0.834507 |
| 35 | 1 | 0 | -4.09281 | -1.4462  | 0.113831 |
| 36 | 6 | 0 | -4.51214 | 0.720845 | -1.22236 |
| 37 | 6 | 0 | -5.95063 | 0.749723 | -0.78937 |
| 38 | 6 | 0 | -6.2579  | -1.97853 | 1.936864 |
| 39 | 6 | 0 | -5.4978  | -0.73414 | 2.366738 |
| 40 | 6 | 0 | -3.97541 | -0.743   | 2.144356 |
| 41 | 6 | 0 | -6.80154 | -0.26131 | -1.03113 |
| 42 | 6 | 0 | -8.24621 | -0.35924 | -0.55734 |
| 43 | 6 | 0 | -8.28449 | -0.74886 | 0.948941 |
| 44 | 6 | 0 | -7.45873 | -1.96059 | 1.31719  |
| 45 | 6 | 0 | -8.97078 | -1.42671 | -1.40527 |
| 46 | 6 | 0 | -9.00381 | 0.971849 | -0.74378 |
| 47 | 8 | 0 | -5.70422 | -0.59666 | 3.776907 |
| 48 | 6 | 0 | -5.62761 | -3.30554 | 2.283953 |
| 49 | 6 | 0 | 3.163317 | -1.44825 | -0.83407 |
| 50 | 6 | 0 | 4.581647 | -0.92126 | -1.03094 |
| 51 | 7 | 0 | 2.189709 | -0.44576 | -1.26449 |
| 52 | 8 | 0 | 4.941393 | -0.26909 | -2.00493 |
| 53 | 6 | 0 | 6.539032 | 2.54503  | -0.733   |
| 54 | 1 | 0 | 9.573781 | -1.77486 | 1.666349 |
| 55 | 1 | 0 | 7.154567 | -2.06325 | 1.625169 |
| 56 | 1 | 0 | 7.035872 | -0.41733 | -0.92818 |
| 57 | 1 | 0 | 6.16228  | 0.370016 | 1.932028 |
| 58 | 1 | 0 | 9.709496 | 0.674974 | 2.174689 |
| 59 | 1 | 0 | 8.287579 | -0.0794  | 2.893342 |
| 60 | 1 | 0 | 4.124082 | 1.306237 | 1.484598 |
| 61 | 1 | 0 | 4.010121 | 3.718046 | -0.45802 |
| 62 | 1 | 0 | 1.898496 | 2.109504 | 1.084015 |
| 63 | 1 | 0 | 1.755029 | 4.647379 | -0.71566 |
| 64 | 1 | 0 | -0.36369 | 2.93727  | 0.712599 |
| 65 | 1 | 0 | -1.68367 | 4.11863  | -1.07006 |
| 66 | 1 | 0 | -0.48932 | 5.409527 | -1.15283 |
| 67 | 1 | 0 | -1.00137 | 6.057597 | 1.212664 |
| 68 | 1 | 0 | -2.18729 | 4.75787  | 1.32275  |
| 69 | 1 | 0 | 9.342631 | 0.023045 | -0.80372 |
| 70 | 1 | 0 | 10.80024 | -0.28599 | 0.145463 |
| 71 | 1 | 0 | 10.04519 | -1.60238 | -0.75462 |
| 72 | 1 | 0 | -2.32904 | 7.117781 | -0.62727 |

|     |   |   |            |           |           |
|-----|---|---|------------|-----------|-----------|
| 73  | 1 | 0 | -3.29017   | 6.916868  | 0.84781   |
| 74  | 1 | 0 | -3.52142   | 5.807683  | -0.51448  |
| 75  | 1 | 0 | -2.08575   | -2.37275  | 1.177635  |
| 76  | 1 | 0 | -1.40254   | -0.7719   | 1.370573  |
| 77  | 1 | 0 | 9.250172   | -3.85194  | 0.788296  |
| 78  | 1 | 0 | 7.55743    | -4.28586  | 1.196507  |
| 79  | 1 | 0 | 8.254905   | -4.75376  | -0.36654  |
| 80  | 1 | 0 | 0.108961   | 1.191172  | -2.19329  |
| 81  | 1 | 0 | -2.85756   | -2.13657  | -3.62864  |
| 82  | 1 | 0 | -2.8827    | -4.04142  | -0.48599  |
| 83  | 1 | 0 | -2.70224   | -4.40026  | -2.20709  |
| 84  | 1 | 0 | -1.27506   | -4.37459  | -1.16477  |
| 85  | 1 | 0 | -2.74868   | 1.902796  | 1.544028  |
| 86  | 1 | 0 | -3.53791   | 2.781194  | 0.255239  |
| 87  | 1 | 0 | -4.51936   | 1.861142  | 1.395783  |
| 88  | 1 | 0 | -4.32357   | 1.620798  | -1.82387  |
| 89  | 1 | 0 | -4.38035   | -0.10751  | -1.92312  |
| 90  | 1 | 0 | -6.28395   | 1.635323  | -0.25527  |
| 91  | 1 | 0 | -5.90786   | 0.167376  | 1.913391  |
| 92  | 1 | 0 | -3.575609  | -1.619809 | 2.673529  |
| 93  | 1 | 0 | -3.526092  | 0.089693  | 2.699841  |
| 94  | 1 | 0 | -6.414907  | -1.140681 | -1.548058 |
| 95  | 1 | 0 | -7.991602  | 0.111179  | 1.562595  |
| 96  | 1 | 0 | -9.322341  | -0.956528 | 1.243992  |
| 97  | 1 | 0 | -7.924255  | -2.910931 | 1.056159  |
| 98  | 1 | 0 | -10.008936 | -1.55357  | -1.077297 |
| 99  | 1 | 0 | -8.990802  | -1.143527 | -2.464692 |
| 100 | 1 | 0 | -8.482858  | -2.405744 | -1.339168 |
| 101 | 1 | 0 | -10.062011 | 0.860432  | -0.479465 |
| 102 | 1 | 0 | -8.956211  | 1.314595  | -1.784054 |
| 103 | 1 | 0 | -8.597447  | 1.768478  | -0.110976 |
| 104 | 1 | 0 | -6.656354  | -0.722913 | 3.930457  |
| 105 | 1 | 0 | -4.718263  | -3.467038 | 1.696861  |
| 106 | 1 | 0 | -5.373111  | -3.343152 | 3.348094  |
| 107 | 1 | 0 | -6.298498  | -4.147811 | 2.082542  |
| 108 | 1 | 0 | 3.013238   | -1.66617  | 0.228768  |
| 109 | 1 | 0 | 3.061197   | -2.370636 | -1.414397 |
| 110 | 1 | 0 | 2.563886   | 0.301088  | -1.851121 |
| 111 | 1 | 0 | 7.043158   | 1.871101  | -1.432825 |
| 112 | 1 | 0 | 7.293104   | 3.199932  | -0.284498 |
| 113 | 1 | 0 | 5.872904   | 3.168157  | -1.333711 |



Table S9. Gibbs free energies <sup>a</sup> and equilibrium populations <sup>b</sup> of low-energy conformers of **1g**

| Conformers            | In MeOH       |        |
|-----------------------|---------------|--------|
|                       | G             | P (%)  |
| <b>1g<sub>1</sub></b> | −2331.8921728 | 73.57% |
| <b>1g<sub>2</sub></b> | −2331.8911824 | 25.75% |
| <b>1g<sub>3</sub></b> | −2331.8877616 | 0.69%  |
| <b>1g<sub>4</sub></b> | −2331.8783378 | 0.00%  |

<sup>a</sup> B3LYP/6-31+g (d, p), in kcal/mol; <sup>b</sup> from G values at 298.15K.

Table S10. Cartesian coordinates for the low-energy reoptimized MMFF conformers of **1g** at B3LYP/6-31+g (d, p) level of theory in MeOH

| <b>1g<sub>1</sub></b> |      |      | Standard Orientation (Ångstroms) |          |          |
|-----------------------|------|------|----------------------------------|----------|----------|
| No.                   | Atom | Type | X                                | Y        | Z        |
| 1                     | 6    | 0    | −2.2436                          | −1.71664 | −0.61274 |
| 2                     | 6    | 0    | −2.75805                         | −3.002   | 0.111662 |
| 3                     | 6    | 0    | 5.941541                         | 0.57901  | 0.144066 |
| 4                     | 6    | 0    | 4.88769                          | 0.630224 | 1.265164 |
| 5                     | 6    | 0    | 3.593545                         | 1.343351 | 0.797203 |
| 6                     | 6    | 0    | 3.960754                         | 2.719341 | 0.183659 |
| 7                     | 8    | 0    | 4.937108                         | 2.55188  | −0.85793 |
| 8                     | 6    | 0    | 6.158886                         | 1.991262 | −0.39273 |
| 9                     | 6    | 0    | 2.842244                         | 3.56911  | −0.43048 |
| 10                    | 6    | 0    | 1.565217                         | 3.151215 | −0.5566  |
| 11                    | 6    | 0    | 0.45979                          | 3.869703 | −1.16029 |
| 12                    | 6    | 0    | −0.78132                         | 3.360954 | −1.20903 |
| 13                    | 6    | 0    | −1.89967                         | 4.049358 | −1.81142 |
| 14                    | 6    | 0    | −3.12511                         | 3.508656 | −1.88846 |
| 15                    | 6    | 0    | −4.3105                          | 4.203822 | −2.49509 |
| 16                    | 6    | 0    | −5.48686                         | 4.328503 | −1.52303 |
| 17                    | 6    | 0    | 5.55602                          | −0.38518 | −0.98503 |
| 18                    | 8    | 0    | 4.554088                         | −0.67919 | 1.748723 |
| 19                    | 8    | 0    | 2.75232                          | 1.551511 | 1.959474 |
| 20                    | 6    | 0    | −5.18421                         | 5.212585 | −0.32123 |
| 21                    | 8    | 0    | −2.45541                         | −2.91368 | 1.510435 |
| 22                    | 6    | 0    | −2.91068                         | −0.46163 | −0.02988 |
| 23                    | 6    | 0    | 5.560939                         | −1.27718 | 2.552109 |
| 24                    | 6    | 0    | −1.7334                          | −1.60209 | 3.254233 |
| 25                    | 6    | 0    | −1.01332                         | −0.48418 | 3.161571 |
| 26                    | 6    | 0    | −2.82325                         | −1.75342 | 2.2321   |
| 27                    | 6    | 0    | −2.8713                          | −0.40372 | 1.493086 |
| 28                    | 6    | 0    | −1.63859                         | 0.290293 | 2.043179 |

|    |   |   |          |          |          |
|----|---|---|----------|----------|----------|
| 29 | 8 | 0 | -4.07651 | -1.93157 | 2.933121 |
| 30 | 6 | 0 | -4.71453 | -0.71126 | 2.831289 |
| 31 | 6 | 0 | -4.11869 | 0.205463 | 2.073647 |
| 32 | 8 | 0 | -1.21731 | 1.374046 | 1.652268 |
| 33 | 6 | 0 | -4.574   | 1.590775 | 1.788712 |
| 34 | 6 | 0 | -4.26778 | -3.23941 | -0.06156 |
| 35 | 1 | 0 | -1.17658 | -1.619   | -0.38198 |
| 36 | 6 | 0 | -2.02134 | -4.3136  | -0.3461  |
| 37 | 6 | 0 | -0.51881 | -4.16757 | -0.42021 |
| 38 | 6 | 0 | -0.02508 | -1.19572 | -2.83725 |
| 39 | 6 | 0 | -1.48733 | -0.78363 | -2.92848 |
| 40 | 6 | 0 | -2.43723 | -1.72867 | -2.15038 |
| 41 | 6 | 0 | 0.207926 | -4.50649 | -1.49955 |
| 42 | 6 | 0 | 1.644804 | -4.06973 | -1.81106 |
| 43 | 6 | 0 | 1.661602 | -3.139   | -3.0846  |
| 44 | 6 | 0 | 0.367366 | -2.39471 | -3.31242 |
| 45 | 6 | 0 | 2.482385 | -5.32978 | -2.09903 |
| 46 | 6 | 0 | 2.320236 | -3.32117 | -0.6414  |
| 47 | 8 | 0 | -1.88441 | -0.80229 | -4.30063 |
| 48 | 6 | 0 | 0.866612 | -0.23368 | -2.10741 |
| 49 | 6 | 0 | 1.03241  | 0.948898 | 3.466483 |
| 50 | 6 | 0 | 1.781386 | 0.611695 | 2.176089 |
| 51 | 7 | 0 | 0.091442 | -0.10169 | 3.888055 |
| 52 | 8 | 0 | 1.548968 | -0.34319 | 1.445467 |
| 53 | 6 | 0 | 3.326085 | 4.932478 | -0.87439 |
| 54 | 1 | 0 | 6.892148 | 0.220978 | 0.557135 |
| 55 | 1 | 0 | 5.289108 | 1.202478 | 2.113893 |
| 56 | 1 | 0 | 3.086482 | 0.723469 | 0.048198 |
| 57 | 1 | 0 | 4.402135 | 3.333439 | 0.982812 |
| 58 | 1 | 0 | 6.861153 | 1.978153 | -1.23301 |
| 59 | 1 | 0 | 6.589133 | 2.644907 | 0.375796 |
| 60 | 1 | 0 | 1.292927 | 2.160714 | -0.19913 |
| 61 | 1 | 0 | 0.649701 | 4.842708 | -1.60045 |
| 62 | 1 | 0 | -0.98218 | 2.386003 | -0.77037 |
| 63 | 1 | 0 | -1.72164 | 5.047141 | -2.20657 |
| 64 | 1 | 0 | -3.30357 | 2.508281 | -1.50167 |
| 65 | 1 | 0 | -4.03537 | 5.19855  | -2.86625 |
| 66 | 1 | 0 | -4.63543 | 3.62224  | -3.36629 |
| 67 | 1 | 0 | -5.79368 | 3.335285 | -1.17327 |
| 68 | 1 | 0 | -6.34259 | 4.751422 | -2.06276 |
| 69 | 1 | 0 | 4.623373 | -0.09533 | -1.47867 |
| 70 | 1 | 0 | 6.340269 | -0.40853 | -1.74959 |
| 71 | 1 | 0 | 5.436885 | -1.40603 | -0.60882 |
| 72 | 1 | 0 | -4.39529 | 4.784008 | 0.304333 |

|                       |      |      |                                  |          |          |
|-----------------------|------|------|----------------------------------|----------|----------|
| 73                    | 1    | 0    | -6.07913                         | 5.320959 | 0.299941 |
| 74                    | 1    | 0    | -4.86949                         | 6.2117   | -0.63897 |
| 75                    | 1    | 0    | -2.43019                         | 0.430075 | -0.4473  |
| 76                    | 1    | 0    | -3.94957                         | -0.41917 | -0.38358 |
| 77                    | 1    | 0    | 6.454661                         | -1.49648 | 1.962599 |
| 78                    | 1    | 0    | 5.813636                         | -0.63318 | 3.399572 |
| 79                    | 1    | 0    | 5.169393                         | -2.2215  | 2.940441 |
| 80                    | 1    | 0    | -1.53671                         | -2.38968 | 3.96693  |
| 81                    | 1    | 0    | -5.64003                         | -0.64084 | 3.379819 |
| 82                    | 1    | 0    | -3.83503                         | 2.320497 | 2.13242  |
| 83                    | 1    | 0    | -5.51955                         | 1.810682 | 2.295312 |
| 84                    | 1    | 0    | -4.73047                         | 1.734544 | 0.715767 |
| 85                    | 1    | 0    | -4.58769                         | -4.11231 | 0.51979  |
| 86                    | 1    | 0    | -4.53146                         | -3.41194 | -1.10974 |
| 87                    | 1    | 0    | -4.86771                         | -2.40166 | 0.302771 |
| 88                    | 1    | 0    | -2.23392                         | -5.1144  | 0.374759 |
| 89                    | 1    | 0    | -2.41432                         | -4.64422 | -1.31517 |
| 90                    | 1    | 0    | -0.06018                         | -3.64486 | 0.416446 |
| 91                    | 1    | 0    | -1.61853                         | 0.24689  | -2.58297 |
| 92                    | 1    | 0    | -3.47342                         | -1.46092 | -2.39829 |
| 93                    | 1    | 0    | -2.32461                         | -2.74343 | -2.5471  |
| 94                    | 1    | 0    | -0.29729                         | -5.02521 | -2.31501 |
| 95                    | 1    | 0    | 2.513167                         | -2.44966 | -3.05295 |
| 96                    | 1    | 0    | 1.828202                         | -3.74959 | -3.98288 |
| 97                    | 1    | 0    | -0.3786                          | -2.99112 | -3.84151 |
| 98                    | 1    | 0    | 3.512514                         | -5.06656 | -2.36545 |
| 99                    | 1    | 0    | 2.5218                           | -5.99034 | -1.22478 |
| 100                   | 1    | 0    | 2.063563                         | -5.90889 | -2.93053 |
| 101                   | 1    | 0    | 2.36885                          | -3.94465 | 0.259212 |
| 102                   | 1    | 0    | 1.786056                         | -2.40196 | -0.38394 |
| 103                   | 1    | 0    | 3.348925                         | -3.04023 | -0.89533 |
| 104                   | 1    | 0    | -1.14772                         | -0.41517 | -4.80446 |
| 105                   | 1    | 0    | 0.881745                         | 0.726805 | -2.63281 |
| 106                   | 1    | 0    | 0.496585                         | -0.06574 | -1.09229 |
| 107                   | 1    | 0    | 1.901207                         | -0.57621 | -2.03375 |
| 108                   | 1    | 0    | 1.775765                         | 1.061864 | 4.263396 |
| 109                   | 1    | 0    | 0.513398                         | 1.904912 | 3.349297 |
| 110                   | 1    | 0    | 0.555627                         | -0.89992 | 4.316566 |
| 111                   | 1    | 0    | 3.941703                         | 4.843119 | -1.77532 |
| 112                   | 1    | 0    | 2.520894                         | 5.63837  | -1.08774 |
| 113                   | 1    | 0    | 3.933238                         | 5.392829 | -0.08696 |
| <b>1g<sub>2</sub></b> |      |      | Standard Orientation (Ångstroms) |          |          |
| No.                   | Atom | Type | X                                | Y        | Z        |

|    |   |   |            |           |           |
|----|---|---|------------|-----------|-----------|
| 1  | 6 | 0 | 4.363988   | 0.658727  | -0.216087 |
| 2  | 6 | 0 | 4.621481   | 1.450688  | -1.538549 |
| 3  | 6 | 0 | -1.192356  | -3.54313  | 2.242792  |
| 4  | 6 | 0 | -1.132571  | -2.004219 | 2.270624  |
| 5  | 6 | 0 | -2.332877  | -1.373258 | 1.529777  |
| 6  | 6 | 0 | -2.518147  | -2.012226 | 0.127883  |
| 7  | 8 | 0 | -2.601525  | -3.44366  | 0.258752  |
| 8  | 6 | 0 | -1.412579  | -4.010744 | 0.804395  |
| 9  | 6 | 0 | -3.735916  | -1.582528 | -0.699477 |
| 10 | 6 | 0 | -4.725652  | -0.79791  | -0.221232 |
| 11 | 6 | 0 | -5.907308  | -0.343699 | -0.92692  |
| 12 | 6 | 0 | -6.820023  | 0.463606  | -0.36308  |
| 13 | 6 | 0 | -8.003143  | 0.917644  | -1.058858 |
| 14 | 6 | 0 | -8.914439  | 1.724963  | -0.495306 |
| 15 | 6 | 0 | -10.14814  | 2.211319  | -1.202125 |
| 16 | 6 | 0 | -11.416702 | 1.719383  | -0.504735 |
| 17 | 6 | 0 | -2.273447  | -4.112594 | 3.170338  |
| 18 | 8 | 0 | -1.119458  | -1.506454 | 3.618656  |
| 19 | 8 | 0 | -2.229652  | 0.077382  | 1.518275  |
| 20 | 6 | 0 | -12.667952 | 2.220518  | -1.208861 |
| 21 | 8 | 0 | 3.534829   | 2.356818  | -1.769421 |
| 22 | 6 | 0 | 4.225057   | 1.613814  | 0.979778  |
| 23 | 6 | 0 | 0.183386   | -1.462918 | 4.18623   |
| 24 | 6 | 0 | 1.662968   | 3.416911  | -0.960426 |
| 25 | 6 | 0 | 0.879385   | 2.973581  | 0.022845  |
| 26 | 6 | 0 | 3.137351   | 3.240004  | -0.73875  |
| 27 | 6 | 0 | 3.268542   | 2.773364  | 0.722135  |
| 28 | 6 | 0 | 1.821409   | 2.474358  | 1.076439  |
| 29 | 8 | 0 | 3.768451   | 4.536042  | -0.85916  |
| 30 | 6 | 0 | 3.99474    | 4.93685   | 0.443011  |
| 31 | 6 | 0 | 3.728014   | 4.041678  | 1.390231  |
| 32 | 8 | 0 | 1.457057   | 1.92769   | 2.112828  |
| 33 | 6 | 0 | 3.874708   | 4.197336  | 2.860062  |
| 34 | 6 | 0 | 5.943166   | 2.236518  | -1.533464 |
| 35 | 1 | 0 | 3.387329   | 0.172734  | -0.317077 |
| 36 | 6 | 0 | 4.620111   | 0.537544  | -2.819129 |
| 37 | 6 | 0 | 3.464507   | -0.436935 | -2.858179 |
| 38 | 6 | 0 | 3.861893   | -2.394428 | 0.462366  |
| 39 | 6 | 0 | 4.970527   | -1.536307 | 1.05544   |
| 40 | 6 | 0 | 5.440044   | -0.409884 | 0.102712  |
| 41 | 6 | 0 | 3.614067   | -1.759645 | -3.046771 |
| 42 | 6 | 0 | 2.582515   | -2.852567 | -2.742984 |
| 43 | 6 | 0 | 3.109172   | -3.785713 | -1.584393 |

---

|    |   |   |            |           |           |
|----|---|---|------------|-----------|-----------|
| 44 | 6 | 0 | 4.091898   | -3.111977 | -0.655676 |
| 45 | 6 | 0 | 2.38172    | -3.696444 | -4.015472 |
| 46 | 6 | 0 | 1.202658   | -2.289713 | -2.336152 |
| 47 | 8 | 0 | 6.098144   | -2.366118 | 1.337204  |
| 48 | 6 | 0 | 2.530142   | -2.275684 | 1.141505  |
| 49 | 6 | 0 | -1.286896  | 2.186643  | 1.049744  |
| 50 | 6 | 0 | -1.22495   | 0.676643  | 0.819109  |
| 51 | 7 | 0 | -0.49238   | 2.954354  | 0.084429  |
| 52 | 8 | 0 | -0.412008  | 0.085662  | 0.119567  |
| 53 | 6 | 0 | -3.68801   | -2.124016 | -2.111536 |
| 54 | 1 | 0 | -0.233158  | -3.94169  | 2.595635  |
| 55 | 1 | 0 | -0.210116  | -1.683539 | 1.776609  |
| 56 | 1 | 0 | -3.224275  | -1.580042 | 2.135293  |
| 57 | 1 | 0 | -1.640386  | -1.793144 | -0.490336 |
| 58 | 1 | 0 | -1.51822   | -5.100301 | 0.768697  |
| 59 | 1 | 0 | -0.559013  | -3.75071  | 0.167481  |
| 60 | 1 | 0 | -4.67816   | -0.456452 | 0.811086  |
| 61 | 1 | 0 | -6.060346  | -0.677777 | -1.947868 |
| 62 | 1 | 0 | -6.689048  | 0.805284  | 0.661701  |
| 63 | 1 | 0 | -8.144255  | 0.576819  | -2.082781 |
| 64 | 1 | 0 | -8.779061  | 2.072133  | 0.527082  |
| 65 | 1 | 0 | -10.131195 | 3.307739  | -1.21372  |
| 66 | 1 | 0 | -10.151587 | 1.882982  | -2.248621 |
| 67 | 1 | 0 | -11.431214 | 2.061704  | 0.537228  |
| 68 | 1 | 0 | -11.432219 | 0.622871  | -0.483236 |
| 69 | 1 | 0 | -3.276527  | -3.773974 | 2.893784  |
| 70 | 1 | 0 | -2.271342  | -5.207436 | 3.130526  |
| 71 | 1 | 0 | -2.092635  | -3.824897 | 4.210977  |
| 72 | 1 | 0 | -12.700961 | 3.314727  | -1.218657 |
| 73 | 1 | 0 | -13.563336 | 1.858233  | -0.69412  |
| 74 | 1 | 0 | -12.704331 | 1.865901  | -2.243897 |
| 75 | 1 | 0 | 3.895964   | 1.050319  | 1.861773  |
| 76 | 1 | 0 | 5.221432   | 1.99627   | 1.239172  |
| 77 | 1 | 0 | 0.630617   | -2.460164 | 4.215316  |
| 78 | 1 | 0 | 0.822584   | -0.777613 | 3.621272  |
| 79 | 1 | 0 | 0.097859   | -1.090758 | 5.210621  |
| 80 | 1 | 0 | 1.293977   | 3.843793  | -1.881735 |
| 81 | 1 | 0 | 4.374815   | 5.940719  | 0.544953  |
| 82 | 1 | 0 | 2.909277   | 4.073798  | 3.359568  |
| 83 | 1 | 0 | 4.258952   | 5.18968   | 3.118351  |
| 84 | 1 | 0 | 4.571162   | 3.455361  | 3.26173   |
| 85 | 1 | 0 | 6.036164   | 2.836524  | -2.446327 |
| 86 | 1 | 0 | 6.809076   | 1.569684  | -1.473289 |

---

| 87                    | 1    | 0    | 6.005799                         | 2.943025  | -0.701899 |
|-----------------------|------|------|----------------------------------|-----------|-----------|
| 88                    | 1    | 0    | 4.540756                         | 1.171252  | -3.712365 |
| 89                    | 1    | 0    | 5.571049                         | -0.003319 | -2.895022 |
| 90                    | 1    | 0    | 2.495794                         | -0.018306 | -2.594553 |
| 91                    | 1    | 0    | 4.654464                         | -1.110587 | 2.013263  |
| 92                    | 1    | 0    | 6.325117                         | 0.070491  | 0.541688  |
| 93                    | 1    | 0    | 5.816477                         | -0.867034 | -0.818919 |
| 94                    | 1    | 0    | 4.605647                         | -2.129684 | -3.310582 |
| 95                    | 1    | 0    | 2.273624                         | -4.221765 | -1.024869 |
| 96                    | 1    | 0    | 3.636052                         | -4.646939 | -2.018193 |
| 97                    | 1    | 0    | 5.114216                         | -3.123016 | -1.040608 |
| 98                    | 1    | 0    | 1.678342                         | -4.517986 | -3.837345 |
| 99                    | 1    | 0    | 1.984832                         | -3.089338 | -4.837646 |
| 100                   | 1    | 0    | 3.325344                         | -4.137533 | -4.357688 |
| 101                   | 1    | 0    | 0.775501                         | -1.663501 | -3.128182 |
| 102                   | 1    | 0    | 1.260996                         | -1.685119 | -1.425634 |
| 103                   | 1    | 0    | 0.488098                         | -3.09885  | -2.145522 |
| 104                   | 1    | 0    | 5.749873                         | -3.21185  | 1.667387  |
| 105                   | 1    | 0    | 2.616398                         | -2.586861 | 2.187931  |
| 106                   | 1    | 0    | 2.175339                         | -1.24112  | 1.119599  |
| 107                   | 1    | 0    | 1.762673                         | -2.902727 | 0.683194  |
| 108                   | 1    | 0    | -2.33026                         | 2.500524  | 0.932437  |
| 109                   | 1    | 0    | -0.982069                        | 2.411278  | 2.076146  |
| 110                   | 1    | 0    | -0.930733                        | 3.040945  | -0.829625 |
| 111                   | 1    | 0    | -3.787339                        | -3.214353 | -2.104018 |
| 112                   | 1    | 0    | -4.467064                        | -1.730144 | -2.766425 |
| 113                   | 1    | 0    | -2.730842                        | -1.868948 | -2.579882 |
| <b>1g<sub>3</sub></b> |      |      | Standard Orientation (Ångstroms) |           |           |
| No.                   | Atom | Type | X                                | Y         | Z         |
| 1                     | 6    | 0    | -3.176596                        | -0.507139 | 1.119609  |
| 2                     | 6    | 0    | -3.592654                        | -1.806553 | 1.882677  |
| 3                     | 6    | 0    | 7.58026                          | -0.382678 | -0.891548 |
| 4                     | 6    | 0    | 6.217439                         | -0.951601 | -1.328831 |
| 5                     | 6    | 0    | 5.057025                         | 0.018967  | -0.988227 |
| 6                     | 6    | 0    | 5.14076                          | 0.490802  | 0.489765  |
| 7                     | 8    | 0    | 6.458948                         | 1.021225  | 0.73979   |
| 8                     | 6    | 0    | 7.486697                         | 0.050907  | 0.569228  |
| 9                     | 6    | 0    | 4.161745                         | 1.568354  | 0.972009  |
| 10                    | 6    | 0    | 3.147044                         | 2.055336  | 0.226787  |
| 11                    | 6    | 0    | 2.180978                         | 3.061258  | 0.623661  |
| 12                    | 6    | 0    | 1.047748                         | 3.2766    | -0.06271  |
| 13                    | 6    | 0    | 0.059593                         | 4.254461  | 0.331958  |
| 14                    | 6    | 0    | -1.08925                         | 4.433663  | -0.337072 |

|    |   |   |           |           |           |
|----|---|---|-----------|-----------|-----------|
| 15 | 6 | 0 | -2.145373 | 5.423556  | 0.064225  |
| 16 | 6 | 0 | -2.39661  | 6.445848  | -1.044204 |
| 17 | 6 | 0 | 8.053671  | 0.776248  | -1.777867 |
| 18 | 8 | 0 | 6.175571  | -1.22877  | -2.740195 |
| 19 | 8 | 0 | 3.782478  | -0.557272 | -1.383496 |
| 20 | 6 | 0 | -3.480745 | 7.436754  | -0.650026 |
| 21 | 8 | 0 | -2.533135 | -2.771688 | 1.791733  |
| 22 | 6 | 0 | -1.897273 | 0.089515  | 1.723261  |
| 23 | 6 | 0 | 6.882456  | -2.405352 | -3.110116 |
| 24 | 6 | 0 | -0.337909 | -3.221857 | 1.24092   |
| 25 | 6 | 0 | 0.365444  | -2.53818  | 0.337557  |
| 26 | 6 | 0 | -1.214258 | -2.389202 | 2.136805  |
| 27 | 6 | 0 | -0.781262 | -0.936317 | 1.872606  |
| 28 | 6 | 0 | 0.059328  | -1.099893 | 0.619562  |
| 29 | 8 | 0 | -0.893596 | -2.716347 | 3.508483  |
| 30 | 6 | 0 | -0.073768 | -1.686707 | 3.927129  |
| 31 | 6 | 0 | 0.07165   | -0.669814 | 3.082073  |
| 32 | 8 | 0 | 0.47957   | -0.175021 | -0.066608 |
| 33 | 6 | 0 | 0.886982  | 0.556066  | 3.263398  |
| 34 | 6 | 0 | -3.930477 | -1.565654 | 3.36335   |
| 35 | 1 | 0 | -2.910749 | -0.807358 | 0.099904  |
| 36 | 6 | 0 | -4.822286 | -2.540341 | 1.233597  |
| 37 | 6 | 0 | -4.707618 | -2.68774  | -0.266746 |
| 38 | 6 | 0 | -4.229084 | 0.966052  | -1.475764 |
| 39 | 6 | 0 | -4.093174 | 1.602758  | -0.098879 |
| 40 | 6 | 0 | -4.269658 | 0.587992  | 1.059367  |
| 41 | 6 | 0 | -5.660299 | -2.290431 | -1.128183 |
| 42 | 6 | 0 | -5.499151 | -2.063967 | -2.636238 |
| 43 | 6 | 0 | -5.700477 | -0.537443 | -2.981945 |
| 44 | 6 | 0 | -5.396103 | 0.392599  | -1.83242  |
| 45 | 6 | 0 | -6.573617 | -2.890549 | -3.367193 |
| 46 | 6 | 0 | -4.121847 | -2.513367 | -3.171682 |
| 47 | 8 | 0 | -5.096381 | 2.60947   | 0.04547   |
| 48 | 6 | 0 | -2.974539 | 0.943058  | -2.302147 |
| 49 | 6 | 0 | 2.063299  | -2.16866  | -1.490511 |
| 50 | 6 | 0 | 3.307938  | -1.668542 | -0.761483 |
| 51 | 7 | 0 | 1.200137  | -3.004185 | -0.648377 |
| 52 | 8 | 0 | 3.845378  | -2.229099 | 0.18606   |
| 53 | 6 | 0 | 4.416928  | 1.989713  | 2.404082  |
| 54 | 1 | 0 | 8.33916   | -1.170743 | -0.968107 |
| 55 | 1 | 0 | 6.053213  | -1.896939 | -0.798266 |
| 56 | 1 | 0 | 5.167507  | 0.896333  | -1.638324 |

|    |   |   |           |           |           |
|----|---|---|-----------|-----------|-----------|
| 57 | 1 | 0 | 4.996838  | -0.36656  | 1.158241  |
| 58 | 1 | 0 | 8.429107  | 0.504383  | 0.894199  |
| 59 | 1 | 0 | 7.297051  | -0.805164 | 1.228081  |
| 60 | 1 | 0 | 2.989542  | 1.674816  | -0.780099 |
| 61 | 1 | 0 | 2.38761   | 3.650301  | 1.51134   |
| 62 | 1 | 0 | 0.827265  | 2.675577  | -0.943473 |
| 63 | 1 | 0 | 0.270804  | 4.852986  | 1.215592  |
| 64 | 1 | 0 | -1.303884 | 3.830963  | -1.216904 |
| 65 | 1 | 0 | -3.070125 | 4.875063  | 0.279015  |
| 66 | 1 | 0 | -1.861518 | 5.942469  | 0.987885  |
| 67 | 1 | 0 | -2.697646 | 5.935136  | -1.96702  |
| 68 | 1 | 0 | -1.472844 | 6.993847  | -1.266253 |
| 69 | 1 | 0 | 7.363268  | 1.624821  | -1.75483  |
| 70 | 1 | 0 | 9.031768  | 1.137308  | -1.4415   |
| 71 | 1 | 0 | 8.164418  | 0.457872  | -2.819234 |
| 72 | 1 | 0 | -4.427898 | 6.924145  | -0.453897 |
| 73 | 1 | 0 | -3.645749 | 8.158489  | -1.456127 |
| 74 | 1 | 0 | -3.19689  | 7.99156   | 0.249865  |
| 75 | 1 | 0 | -1.550973 | 0.926135  | 1.103945  |
| 76 | 1 | 0 | -2.139129 | 0.535768  | 2.697232  |
| 77 | 1 | 0 | 7.95286   | -2.297615 | -2.917508 |
| 78 | 1 | 0 | 6.486742  | -3.275936 | -2.578567 |
| 79 | 1 | 0 | 6.742312  | -2.562818 | -4.183051 |
| 80 | 1 | 0 | -0.347171 | -4.299932 | 1.310479  |
| 81 | 1 | 0 | 0.356123  | -1.822422 | 4.906577  |
| 82 | 1 | 0 | 1.673926  | 0.596499  | 2.50765   |
| 83 | 1 | 0 | 1.367711  | 0.574838  | 4.246838  |
| 84 | 1 | 0 | 0.269232  | 1.454593  | 3.175726  |
| 85 | 1 | 0 | -4.15376  | -2.514786 | 3.864747  |
| 86 | 1 | 0 | -4.797206 | -0.907027 | 3.476925  |
| 87 | 1 | 0 | -3.097392 | -1.124774 | 3.916519  |
| 88 | 1 | 0 | -4.899735 | -3.552045 | 1.653423  |
| 89 | 1 | 0 | -5.750474 | -2.016028 | 1.491015  |
| 90 | 1 | 0 | -3.739576 | -3.029582 | -0.625015 |
| 91 | 1 | 0 | -3.129496 | 2.112078  | -0.00714  |
| 92 | 1 | 0 | -4.297614 | 1.142284  | 2.007435  |
| 93 | 1 | 0 | -5.265793 | 0.138727  | 0.984062  |
| 94 | 1 | 0 | -6.614777 | -1.958457 | -0.717464 |
| 95 | 1 | 0 | -5.128288 | -0.260595 | -3.874792 |
| 96 | 1 | 0 | -6.749777 | -0.358189 | -3.254466 |
| 97 | 1 | 0 | -6.236064 | 0.500044  | -1.142364 |
| 98 | 1 | 0 | -6.522591 | -2.734038 | -4.450911 |



| 99                    | 1    | 0    | -6.448061                        | -3.963277 | -3.178389 |
|-----------------------|------|------|----------------------------------|-----------|-----------|
| 100                   | 1    | 0    | -7.58321                         | -2.614635 | -3.040492 |
| 101                   | 1    | 0    | -3.952671                        | -3.582123 | -2.994498 |
| 102                   | 1    | 0    | -3.300856                        | -1.961485 | -2.702423 |
| 103                   | 1    | 0    | -4.048164                        | -2.35048  | -4.253347 |
| 104                   | 1    | 0    | -5.163175                        | 3.060726  | -0.81332  |
| 105                   | 1    | 0    | -2.63763                         | 1.967236  | -2.493401 |
| 106                   | 1    | 0    | -2.174379                        | 0.411099  | -1.778909 |
| 107                   | 1    | 0    | -3.112896                        | 0.463574  | -3.274052 |
| 108                   | 1    | 0    | 1.499705                         | -1.329624 | -1.909036 |
| 109                   | 1    | 0    | 2.410272                         | -2.775609 | -2.334271 |
| 110                   | 1    | 0    | 1.590552                         | -3.921258 | -0.441675 |
| 111                   | 1    | 0    | 5.292367                         | 2.644619  | 2.458455  |
| 112                   | 1    | 0    | 3.57579                          | 2.513655  | 2.863783  |
| 113                   | 1    | 0    | 4.603663                         | 1.109752  | 3.029925  |
| <b>1g<sub>4</sub></b> |      |      | Standard Orientation (Ångstroms) |           |           |
| No.                   | Atom | Type | X                                | Y         | Z         |
| 1                     | 6    | 0    | -3.164863                        | 0.03168   | 0.820235  |
| 2                     | 6    | 0    | -3.687365                        | -0.738943 | 2.076477  |
| 3                     | 6    | 0    | 7.554611                         | -0.595    | -0.57177  |
| 4                     | 6    | 0    | 6.225179                         | -1.366592 | -0.668575 |
| 5                     | 6    | 0    | 5.024122                         | -0.411505 | -0.893167 |
| 6                     | 6    | 0    | 5.044318                         | 0.758358  | 0.129264  |
| 7                     | 8    | 0    | 6.336772                         | 1.39844   | 0.08399   |
| 8                     | 6    | 0    | 7.399282                         | 0.525756  | 0.452863  |
| 9                     | 6    | 0    | 4.017336                         | 1.887133  | -0.023707 |
| 10                    | 6    | 0    | 3.00215                          | 1.870381  | -0.913176 |
| 11                    | 6    | 0    | 1.984711                         | 2.888637  | -1.089415 |
| 12                    | 6    | 0    | 0.85055                          | 2.658914  | -1.770311 |
| 13                    | 6    | 0    | -0.213976                        | 3.61817   | -1.963421 |
| 14                    | 6    | 0    | -0.67774                         | 4.442955  | -1.011635 |
| 15                    | 6    | 0    | -1.823301                        | 5.393365  | -1.213047 |
| 16                    | 6    | 0    | -2.932248                        | 5.142284  | -0.190615 |
| 17                    | 6    | 0    | 8.02085                          | -0.040704 | -1.923862 |
| 18                    | 8    | 0    | 6.238991                         | -2.33436  | -1.733323 |
| 19                    | 8    | 0    | 3.784091                         | -1.167305 | -0.950961 |
| 20                    | 6    | 0    | -4.111744                        | 6.076758  | -0.406824 |
| 21                    | 8    | 0    | -2.657395                        | -1.611361 | 2.568274  |
| 22                    | 6    | 0    | -1.92173                         | 0.859768  | 1.171788  |
| 23                    | 6    | 0    | 6.993709                         | -3.5008   | -1.432311 |
| 24                    | 6    | 0    | -0.440074                        | -2.25352  | 2.508931  |
| 25                    | 6    | 0    | 0.342064                         | -2.106179 | 1.43893   |
| 26                    | 6    | 0    | -1.358449                        | -1.095107 | 2.794595  |

|    |   |   |           |           |           |
|----|---|---|-----------|-----------|-----------|
| 27 | 6 | 0 | -0.855969 | 0.038835  | 1.884458  |
| 28 | 6 | 0 | 0.05001   | -0.726236 | 0.937872  |
| 29 | 8 | 0 | -1.160417 | -0.693174 | 4.169453  |
| 30 | 6 | 0 | -0.324479 | 0.403809  | 4.090323  |
| 31 | 6 | 0 | -0.074133 | 0.864918  | 2.867803  |
| 32 | 8 | 0 | 0.525679  | -0.273264 | -0.096818 |
| 33 | 6 | 0 | 0.783163  | 2.012897  | 2.4849    |
| 34 | 6 | 0 | -4.146392 | 0.187111  | 3.214806  |
| 35 | 1 | 0 | -2.824527 | -0.722841 | 0.102567  |
| 36 | 6 | 0 | -4.877816 | -1.713535 | 1.75177   |
| 37 | 6 | 0 | -4.630338 | -2.570563 | 0.5308    |
| 38 | 6 | 0 | -3.921802 | 0.053447  | -2.247591 |
| 39 | 6 | 0 | -3.898161 | 1.279461  | -1.344533 |
| 40 | 6 | 0 | -4.210382 | 0.946721  | 0.137295  |
| 41 | 6 | 0 | -5.481631 | -2.652009 | -0.506634 |
| 42 | 6 | 0 | -5.170192 | -3.182734 | -1.911446 |
| 43 | 6 | 0 | -5.288942 | -2.020204 | -2.972212 |
| 44 | 6 | 0 | -5.066669 | -0.643517 | -2.394386 |
| 45 | 6 | 0 | -6.195508 | -4.28025  | -2.252307 |
| 46 | 6 | 0 | -3.762654 | -3.808984 | -2.023345 |
| 47 | 8 | 0 | -4.885047 | 2.207167  | -1.79969  |
| 48 | 6 | 0 | -2.594823 | -0.341409 | -2.831395 |
| 49 | 6 | 0 | 2.128788  | -2.690041 | -0.242656 |
| 50 | 6 | 0 | 3.32189   | -1.820723 | 0.147853  |
| 51 | 7 | 0 | 1.233383  | -2.987942 | 0.880313  |
| 52 | 8 | 0 | 3.837335  | -1.783379 | 1.258505  |
| 53 | 6 | 0 | 4.222386  | 3.002899  | 0.979828  |
| 54 | 1 | 0 | 8.339597  | -1.275553 | -0.220398 |
| 55 | 1 | 0 | 6.072448  | -1.908231 | 0.272449  |
| 56 | 1 | 0 | 5.128316  | 0.009129  | -1.901468 |
| 57 | 1 | 0 | 4.906244  | 0.362786  | 1.142835  |
| 58 | 1 | 0 | 8.31586   | 1.122733  | 0.50793   |
| 59 | 1 | 0 | 7.214679  | 0.125494  | 1.457227  |
| 60 | 1 | 0 | 2.880532  | 1.014296  | -1.573085 |
| 61 | 1 | 0 | 2.150854  | 3.864086  | -0.643955 |
| 62 | 1 | 0 | 0.681368  | 1.68725   | -2.232387 |
| 63 | 1 | 0 | -0.686647 | 3.596629  | -2.943435 |
| 64 | 1 | 0 | -0.221364 | 4.444611  | -0.024164 |
| 65 | 1 | 0 | -1.448332 | 6.418333  | -1.106848 |
| 66 | 1 | 0 | -2.228641 | 5.303208  | -2.228126 |
| 67 | 1 | 0 | -2.545238 | 5.28292   | 0.826101  |
| 68 | 1 | 0 | -3.280184 | 4.105874  | -0.2587   |
| 69 | 1 | 0 | 7.304062  | 0.666674  | -2.351557 |
| 70 | 1 | 0 | 8.975637  | 0.484543  | -1.810668 |

|     |   |   |           |           |           |
|-----|---|---|-----------|-----------|-----------|
| 71  | 1 | 0 | 8.176057  | -0.845834 | -2.648971 |
| 72  | 1 | 0 | -3.805373 | 7.123462  | -0.313111 |
| 73  | 1 | 0 | -4.890393 | 5.882252  | 0.33733   |
| 74  | 1 | 0 | -4.548565 | 5.93326   | -1.400336 |
| 75  | 1 | 0 | -1.500569 | 1.300901  | 0.260517  |
| 76  | 1 | 0 | -2.225478 | 1.715273  | 1.789985  |
| 77  | 1 | 0 | 8.053309  | -3.262439 | -1.310042 |
| 78  | 1 | 0 | 6.607831  | -3.987924 | -0.531797 |
| 79  | 1 | 0 | 6.89417   | -4.195848 | -2.270518 |
| 80  | 1 | 0 | -0.482207 | -3.150925 | 3.108851  |
| 81  | 1 | 0 | 0.029429  | 0.77057   | 5.040404  |
| 82  | 1 | 0 | 1.616015  | 1.668976  | 1.868075  |
| 83  | 1 | 0 | 1.203286  | 2.50966   | 3.365524  |
| 84  | 1 | 0 | 0.211665  | 2.756647  | 1.922645  |
| 85  | 1 | 0 | -4.447027 | -0.401248 | 4.089798  |
| 86  | 1 | 0 | -4.995655 | 0.807742  | 2.9123    |
| 87  | 1 | 0 | -3.349627 | 0.850506  | 3.560859  |
| 88  | 1 | 0 | -5.027709 | -2.393872 | 2.600536  |
| 89  | 1 | 0 | -5.806951 | -1.143798 | 1.631013  |
| 90  | 1 | 0 | -3.646945 | -3.031918 | 0.48202   |
| 91  | 1 | 0 | -2.934279 | 1.791787  | -1.421666 |
| 92  | 1 | 0 | -4.305018 | 1.888485  | 0.694542  |
| 93  | 1 | 0 | -5.210023 | 0.502507  | 0.193772  |
| 94  | 1 | 0 | -6.457097 | -2.174196 | -0.406238 |
| 95  | 1 | 0 | -4.625347 | -2.201093 | -3.825434 |
| 96  | 1 | 0 | -6.301098 | -2.015742 | -3.399989 |
| 97  | 1 | 0 | -5.964613 | -0.231022 | -1.928657 |
| 98  | 1 | 0 | -6.036456 | -4.668354 | -3.265019 |
| 99  | 1 | 0 | -6.122434 | -5.124073 | -1.555948 |
| 100 | 1 | 0 | -7.222543 | -3.899554 | -2.201628 |
| 101 | 1 | 0 | -3.644501 | -4.654309 | -1.335163 |
| 102 | 1 | 0 | -2.973697 | -3.082827 | -1.801755 |
| 103 | 1 | 0 | -3.580878 | -4.189684 | -3.035299 |
| 104 | 1 | 0 | -4.848469 | 2.196145  | -2.771407 |
| 105 | 1 | 0 | -2.201048 | 0.475726  | -3.445182 |
| 106 | 1 | 0 | -1.870292 | -0.554422 | -2.039857 |
| 107 | 1 | 0 | -2.657392 | -1.224158 | -3.472332 |
| 108 | 1 | 0 | 1.571215  | -2.229423 | -1.064074 |
| 109 | 1 | 0 | 2.53326   | -3.635694 | -0.620512 |
| 110 | 1 | 0 | 1.60472   | -3.664812 | 1.543085  |
| 111 | 1 | 0 | 5.068665  | 3.630959  | 0.683591  |
| 112 | 1 | 0 | 3.350149  | 3.649183  | 1.101718  |
| 113 | 1 | 0 | 4.431058  | 2.586458  | 1.971727  |

Table S11. Gibbs free energies <sup>a</sup> and equilibrium populations <sup>b</sup> of low-energy conformers of **1h**

| Conformers            | In MeOH       |        |
|-----------------------|---------------|--------|
|                       | G             | P (%)  |
| <b>1h<sub>1</sub></b> | −2331.8887971 | 0.02%  |
| <b>1h<sub>2</sub></b> | −2331.8881096 | 0.01%  |
| <b>1h<sub>3</sub></b> | −2331.893428  | 3.33%  |
| <b>1h<sub>4</sub></b> | −2331.8966049 | 96.63% |

<sup>a</sup> B3LYP/6-31+g (d, p), in kcal/mol; <sup>b</sup> from G values at 298.15K.

Table S12. Cartesian coordinates for the low-energy reoptimized MMFF conformers of **1h** at B3LYP/6-31+g (d, p) level of theory in MeOH

| <b>1h<sub>1</sub></b> |      |      | Standard Orientation (Ångstroms) |           |           |
|-----------------------|------|------|----------------------------------|-----------|-----------|
| No.                   | Atom | Type | X                                | Y         | Z         |
| 1                     | 6    | 0    | 3.030459                         | 0.608821  | 1.079357  |
| 2                     | 6    | 0    | 2.999188                         | 2.175176  | 1.259691  |
| 3                     | 6    | 0    | −1.289117                        | −5.093611 | 0.116503  |
| 4                     | 6    | 0    | −0.657983                        | −4.113001 | −0.88687  |
| 5                     | 6    | 0    | −1.507279                        | −2.831131 | −1.049852 |
| 6                     | 6    | 0    | −2.974242                        | −3.235244 | −1.353451 |
| 7                     | 8    | 0    | −3.476848                        | −4.144697 | −0.364344 |
| 8                     | 6    | 0    | −2.734431                        | −5.359113 | −0.297785 |
| 9                     | 6    | 0    | −4.020234                        | −2.122817 | −1.474406 |
| 10                    | 6    | 0    | −3.858566                        | −0.893773 | −0.942223 |
| 11                    | 6    | 0    | −4.757825                        | 0.238184  | −1.03099  |
| 12                    | 6    | 0    | −4.432014                        | 1.445826  | −0.543432 |
| 13                    | 6    | 0    | −5.309606                        | 2.591473  | −0.614543 |
| 14                    | 6    | 0    | −4.975086                        | 3.791514  | −0.116192 |
| 15                    | 6    | 0    | −5.873033                        | 4.9959    | −0.166813 |
| 16                    | 6    | 0    | −5.339066                        | 6.110525  | −1.070502 |
| 17                    | 6    | 0    | −1.22104                         | −4.600952 | 1.567217  |
| 18                    | 8    | 0    | 0.672867                         | −3.79384  | −0.447359 |
| 19                    | 8    | 0    | −0.981774                        | −2.088669 | −2.179975 |
| 20                    | 6    | 0    | −4.054285                        | 6.746851  | −0.558916 |
| 21                    | 8    | 0    | 3.581267                         | 2.893973  | 0.146984  |
| 22                    | 6    | 0    | 4.161359                         | 0.214265  | 0.106094  |
| 23                    | 6    | 0    | 1.633439                         | −3.890879 | −1.498628 |
| 24                    | 6    | 0    | 2.238409                         | 2.461336  | −1.81272  |
| 25                    | 6    | 0    | 1.77329                          | 1.329644  | −2.344087 |
| 26                    | 6    | 0    | 3.576066                         | 2.342959  | −1.159333 |
| 27                    | 6    | 0    | 3.982606                         | 0.867526  | −1.256107 |
| 28                    | 6    | 0    | 2.821574                         | 0.291867  | −2.055473 |

|    |   |   |           |           |           |
|----|---|---|-----------|-----------|-----------|
| 29 | 8 | 0 | 4.50391   | 3.109306  | -1.979291 |
| 30 | 6 | 0 | 5.436661  | 2.196978  | -2.422995 |
| 31 | 6 | 0 | 5.229605  | 0.929632  | -2.081812 |
| 32 | 8 | 0 | 2.737921  | -0.871856 | -2.434042 |
| 33 | 6 | 0 | 6.050724  | -0.2565   | -2.430917 |
| 34 | 6 | 0 | 3.88169   | 2.644395  | 2.437223  |
| 35 | 1 | 0 | 2.080571  | 0.322137  | 0.613987  |
| 36 | 6 | 0 | 1.552046  | 2.75182   | 1.444305  |
| 37 | 6 | 0 | 0.716712  | 2.167545  | 2.551041  |
| 38 | 6 | 0 | 1.22805   | -1.658753 | 3.079493  |
| 39 | 6 | 0 | 2.600926  | -1.646212 | 2.42177   |
| 40 | 6 | 0 | 3.190365  | -0.207928 | 2.402286  |
| 41 | 6 | 0 | -0.465509 | 1.559392  | 2.339058  |
| 42 | 6 | 0 | -1.268192 | 0.726909  | 3.34566   |
| 43 | 6 | 0 | -1.198934 | -0.790485 | 2.942559  |
| 44 | 6 | 0 | 0.156841  | -1.187336 | 2.415571  |
| 45 | 6 | 0 | -2.738051 | 1.185457  | 3.302094  |
| 46 | 6 | 0 | -0.778125 | 0.897477  | 4.799747  |
| 47 | 8 | 0 | 2.561979  | -2.199827 | 1.119641  |
| 48 | 6 | 0 | 1.220005  | -2.081423 | 4.521312  |
| 49 | 6 | 0 | -0.013503 | -0.203333 | -3.235742 |
| 50 | 6 | 0 | -0.535176 | -0.821331 | -1.940728 |
| 51 | 7 | 0 | 0.593947  | 1.118502  | -3.021963 |
| 52 | 8 | 0 | -0.595427 | -0.240815 | -0.86326  |
| 53 | 6 | 0 | -5.240927 | -2.559171 | -2.25135  |
| 54 | 1 | 0 | -0.728298 | -6.03644  | 0.07843   |
| 55 | 1 | 0 | -0.602773 | -4.619354 | -1.861824 |
| 56 | 1 | 0 | -1.43863  | -2.258796 | -0.119795 |
| 57 | 1 | 0 | -2.967122 | -3.751141 | -2.325594 |
| 58 | 1 | 0 | -3.228908 | -6.012455 | 0.429028  |
| 59 | 1 | 0 | -2.781231 | -5.865521 | -1.269447 |
| 60 | 1 | 0 | -2.965003 | -0.689751 | -0.356576 |
| 61 | 1 | 0 | -5.722676 | 0.10161   | -1.507531 |
| 62 | 1 | 0 | -3.46319  | 1.597336  | -0.070513 |
| 63 | 1 | 0 | -6.276125 | 2.455193  | -1.095258 |
| 64 | 1 | 0 | -4.013497 | 3.92559   | 0.37547   |
| 65 | 1 | 0 | -6.86975  | 4.708444  | -0.523895 |
| 66 | 1 | 0 | -6.008344 | 5.375904  | 0.852945  |
| 67 | 1 | 0 | -6.105164 | 6.891642  | -1.147074 |
| 68 | 1 | 0 | -5.175388 | 5.727257  | -2.084931 |
| 69 | 1 | 0 | -1.772255 | -3.667544 | 1.712225  |
| 70 | 1 | 0 | -1.654605 | -5.346848 | 2.24246   |
| 71 | 1 | 0 | -0.185486 | -4.440581 | 1.882797  |
| 72 | 1 | 0 | -3.771246 | 7.588039  | -1.199893 |

|                       |      |      |                                  |           |           |
|-----------------------|------|------|----------------------------------|-----------|-----------|
| 73                    | 1    | 0    | -3.223792                        | 6.034602  | -0.560904 |
| 74                    | 1    | 0    | -4.182801                        | 7.126264  | 0.459778  |
| 75                    | 1    | 0    | 5.124685                         | 0.513495  | 0.541868  |
| 76                    | 1    | 0    | 4.212466                         | -0.872546 | -0.016967 |
| 77                    | 1    | 0    | 2.611169                         | -3.594055 | -1.112532 |
| 78                    | 1    | 0    | 1.370419                         | -3.236042 | -2.332533 |
| 79                    | 1    | 0    | 1.702658                         | -4.926723 | -1.845138 |
| 80                    | 1    | 0    | 1.728678                         | 3.411947  | -1.866866 |
| 81                    | 1    | 0    | 6.229686                         | 2.617507  | -3.019683 |
| 82                    | 1    | 0    | 5.461015                         | -0.983905 | -2.996531 |
| 83                    | 1    | 0    | 6.429778                         | -0.743594 | -1.527504 |
| 84                    | 1    | 0    | 6.912922                         | 0.023277  | -3.045268 |
| 85                    | 1    | 0    | 3.511949                         | 2.329176  | 3.415448  |
| 86                    | 1    | 0    | 3.953951                         | 3.739248  | 2.453653  |
| 87                    | 1    | 0    | 4.90807                          | 2.277622  | 2.3206    |
| 88                    | 1    | 0    | 1.62242                          | 3.835999  | 1.607509  |
| 89                    | 1    | 0    | 1.007297                         | 2.654283  | 0.499114  |
| 90                    | 1    | 0    | 1.148358                         | 2.201719  | 3.546213  |
| 91                    | 1    | 0    | 3.271294                         | -2.286489 | 3.007628  |
| 92                    | 1    | 0    | 2.770712                         | 0.337152  | 3.253462  |
| 93                    | 1    | 0    | 4.264027                         | -0.291091 | 2.621431  |
| 94                    | 1    | 0    | -0.851711                        | 1.527798  | 1.318182  |
| 95                    | 1    | 0    | -1.508988                        | -1.42809  | 3.777765  |
| 96                    | 1    | 0    | -1.921968                        | -0.993116 | 2.140722  |
| 97                    | 1    | 0    | 0.297918                         | -0.913758 | 1.369397  |
| 98                    | 1    | 0    | -3.354449                        | 0.60146   | 3.995274  |
| 99                    | 1    | 0    | -2.834899                        | 2.242389  | 3.576598  |
| 100                   | 1    | 0    | -3.16657                         | 1.063947  | 2.301765  |
| 101                   | 1    | 0    | 0.262517                         | 0.585202  | 4.92757   |
| 102                   | 1    | 0    | -1.383626                        | 0.299192  | 5.49067   |
| 103                   | 1    | 0    | -0.852228                        | 1.942539  | 5.123575  |
| 104                   | 1    | 0    | 1.776117                         | -2.775803 | 1.041465  |
| 105                   | 1    | 0    | 0.227032                         | -2.041625 | 4.975293  |
| 106                   | 1    | 0    | 1.573215                         | -3.114314 | 4.608599  |
| 107                   | 1    | 0    | 1.882387                         | -1.439081 | 5.110577  |
| 108                   | 1    | 0    | 0.692654                         | -0.883192 | -3.720175 |
| 109                   | 1    | 0    | -0.870342                        | -0.074753 | -3.906023 |
| 110                   | 1    | 0    | -0.09555                         | 1.842031  | -2.826555 |
| 111                   | 1    | 0    | -4.9589                          | -2.816719 | -3.277893 |
| 112                   | 1    | 0    | -6.024629                        | -1.802222 | -2.312526 |
| 113                   | 1    | 0    | -5.689361                        | -3.443444 | -1.78585  |
| <b>1h<sub>2</sub></b> |      |      | Standard Orientation (Ångstroms) |           |           |
| No.                   | Atom | Type | X                                | Y         | Z         |

|    |   |   |           |           |           |
|----|---|---|-----------|-----------|-----------|
| 1  | 6 | 0 | 3.613208  | -1.251613 | 0.102983  |
| 2  | 6 | 0 | 3.534226  | -1.362016 | -1.47211  |
| 3  | 6 | 0 | -8.770408 | -0.058371 | -0.341015 |
| 4  | 6 | 0 | -7.459068 | -0.819285 | -0.047036 |
| 5  | 6 | 0 | -6.401274 | 0.12082   | 0.575265  |
| 6  | 6 | 0 | -6.256782 | 1.40985   | -0.271123 |
| 7  | 8 | 0 | -7.532876 | 2.044314  | -0.440627 |
| 8  | 6 | 0 | -8.456173 | 1.209673  | -1.138929 |
| 9  | 6 | 0 | -5.293316 | 2.420451  | 0.350255  |
| 10 | 6 | 0 | -4.102639 | 2.647642  | -0.245383 |
| 11 | 6 | 0 | -3.042362 | 3.521947  | 0.209189  |
| 12 | 6 | 0 | -1.879735 | 3.647938  | -0.450349 |
| 13 | 6 | 0 | -0.808212 | 4.505403  | 0.003509  |
| 14 | 6 | 0 | 0.354896  | 4.628204  | -0.65397  |
| 15 | 6 | 0 | 1.478798  | 5.515899  | -0.198525 |
| 16 | 6 | 0 | 2.779099  | 4.750303  | 0.057949  |
| 17 | 6 | 0 | -9.557422 | 0.284218  | 0.930865  |
| 18 | 8 | 0 | -7.670521 | -1.919386 | 0.853346  |
| 19 | 8 | 0 | -5.137487 | -0.54949  | 0.827344  |
| 20 | 6 | 0 | 2.680949  | 3.769974  | 1.2184    |
| 21 | 8 | 0 | 2.17294   | -1.529856 | -1.923241 |
| 22 | 6 | 0 | 2.234166  | -1.458299 | 0.773578  |
| 23 | 6 | 0 | -8.233495 | -3.063962 | 0.225813  |
| 24 | 6 | 0 | 0.000119  | -2.349486 | -1.777572 |
| 25 | 6 | 0 | -0.879182 | -2.202262 | -0.787631 |
| 26 | 6 | 0 | 1.415438  | -2.585522 | -1.347885 |
| 27 | 6 | 0 | 1.392293  | -2.584683 | 0.185924  |
| 28 | 6 | 0 | -0.083846 | -2.361862 | 0.471176  |
| 29 | 8 | 0 | 1.798849  | -3.899026 | -1.811209 |
| 30 | 6 | 0 | 1.982097  | -4.635819 | -0.656722 |
| 31 | 6 | 0 | 1.789767  | -3.994474 | 0.492649  |
| 32 | 8 | 0 | -0.579466 | -2.31591  | 1.592442  |
| 33 | 6 | 0 | 1.895013  | -4.542863 | 1.869258  |
| 34 | 6 | 0 | 4.39454   | -2.468779 | -2.112264 |
| 35 | 1 | 0 | 3.843737  | -0.206992 | 0.328832  |
| 36 | 6 | 0 | 3.939241  | 0.010837  | -2.129737 |
| 37 | 6 | 0 | 5.311985  | 0.534734  | -1.787809 |
| 38 | 6 | 0 | 6.412521  | -0.413611 | 1.751391  |
| 39 | 6 | 0 | 5.376871  | -1.489349 | 2.065287  |
| 40 | 6 | 0 | 4.745377  | -2.085056 | 0.779298  |
| 41 | 6 | 0 | 5.523077  | 1.66584   | -1.090306 |
| 42 | 6 | 0 | 6.854714  | 2.165326  | -0.523295 |
| 43 | 6 | 0 | 6.871587  | 2.028668  | 1.043954  |

|    |   |   |            |           |           |
|----|---|---|------------|-----------|-----------|
| 44 | 6 | 0 | 6.056805   | 0.875557  | 1.58038   |
| 45 | 6 | 0 | 7.001067   | 3.65652   | −0.890288 |
| 46 | 6 | 0 | 8.075835   | 1.430739  | −1.117133 |
| 47 | 8 | 0 | 4.379477   | −0.98486  | 2.940532  |
| 48 | 6 | 0 | 7.814776   | −0.931515 | 1.579398  |
| 49 | 6 | 0 | −3.06002   | −1.541298 | 0.282028  |
| 50 | 6 | 0 | −4.388498  | −0.983301 | −0.218474 |
| 51 | 7 | 0 | −2.223453  | −1.961424 | −0.84612  |
| 52 | 8 | 0 | −4.709487  | −0.906716 | −1.39979  |
| 53 | 6 | 0 | −5.770035  | 3.08098   | 1.619289  |
| 54 | 1 | 0 | −9.421305  | −0.695522 | −0.952076 |
| 55 | 1 | 0 | −7.070801  | −1.221332 | −0.989886 |
| 56 | 1 | 0 | −6.761802  | 0.387194  | 1.576038  |
| 57 | 1 | 0 | −5.895626  | 1.16253   | −1.276147 |
| 58 | 1 | 0 | −9.368537  | 1.792394  | −1.305251 |
| 59 | 1 | 0 | −8.048715  | 0.962602  | −2.126839 |
| 60 | 1 | 0 | −3.879856  | 2.10993   | −1.168519 |
| 61 | 1 | 0 | −3.195148  | 4.085129  | 1.124254  |
| 62 | 1 | 0 | −1.708013  | 3.087751  | −1.36739  |
| 63 | 1 | 0 | −0.969935  | 5.065005  | 0.92276   |
| 64 | 1 | 0 | 0.522389   | 4.075446  | −1.576275 |
| 65 | 1 | 0 | 1.659212   | 6.261787  | −0.982171 |
| 66 | 1 | 0 | 1.198553   | 6.073107  | 0.703734  |
| 67 | 1 | 0 | 3.572923   | 5.474256  | 0.277945  |
| 68 | 1 | 0 | 3.083945   | 4.212739  | −0.847685 |
| 69 | 1 | 0 | −9.825139  | −0.620164 | 1.486346  |
| 70 | 1 | 0 | −8.995593  | 0.941156  | 1.601546  |
| 71 | 1 | 0 | −10.491165 | 0.796386  | 0.673714  |
| 72 | 1 | 0 | 2.349446   | 4.274156  | 2.13169   |
| 73 | 1 | 0 | 3.660212   | 3.32391   | 1.416451  |
| 74 | 1 | 0 | 1.982602   | 2.956563  | 0.998534  |
| 75 | 1 | 0 | 2.328204   | −1.592008 | 1.855563  |
| 76 | 1 | 0 | 1.679054   | −0.514875 | 0.658467  |
| 77 | 1 | 0 | −8.321459  | −3.854732 | 0.975848  |
| 78 | 1 | 0 | −7.582768  | −3.420736 | −0.578084 |
| 79 | 1 | 0 | −9.231802  | −2.847239 | −0.162932 |
| 80 | 1 | 0 | −0.257437  | −2.2997   | −2.82543  |
| 81 | 1 | 0 | 2.262693   | −5.663984 | −0.820319 |
| 82 | 1 | 0 | 0.927359   | −4.501399 | 2.377847  |
| 83 | 1 | 0 | 2.620739   | −3.97838  | 2.461451  |
| 84 | 1 | 0 | 2.219128   | −5.588753 | 1.85594   |
| 85 | 1 | 0 | 5.464263   | −2.244071 | −2.088595 |
| 86 | 1 | 0 | 4.111306   | −2.618842 | −3.16078  |



| 87                    | 1    | 0    | 4.26258                          | -3.431577 | -1.613666 |
|-----------------------|------|------|----------------------------------|-----------|-----------|
| 88                    | 1    | 0    | 3.869646                         | -0.079855 | -3.222554 |
| 89                    | 1    | 0    | 3.176353                         | 0.757684  | -1.866301 |
| 90                    | 1    | 0    | 6.148063                         | -0.08916  | -2.087069 |
| 91                    | 1    | 0    | 5.874144                         | -2.301995 | 2.609084  |
| 92                    | 1    | 0    | 5.569263                         | -2.260414 | 0.082077  |
| 93                    | 1    | 0    | 4.35013                          | -3.074864 | 1.026927  |
| 94                    | 1    | 0    | 4.652653                         | 2.251476  | -0.794727 |
| 95                    | 1    | 0    | 7.901155                         | 1.988498  | 1.418281  |
| 96                    | 1    | 0    | 6.447182                         | 2.937578  | 1.493303  |
| 97                    | 1    | 0    | 5.008322                         | 1.136478  | 1.73485   |
| 98                    | 1    | 0    | 7.928266                         | 4.074288  | -0.481463 |
| 99                    | 1    | 0    | 7.020375                         | 3.799945  | -1.977153 |
| 100                   | 1    | 0    | 6.168957                         | 4.251421  | -0.495009 |
| 101                   | 1    | 0    | 8.059827                         | 0.358691  | -0.902004 |
| 102                   | 1    | 0    | 9.011904                         | 1.830607  | -0.709914 |
| 103                   | 1    | 0    | 8.119628                         | 1.548269  | -2.206498 |
| 104                   | 1    | 0    | 4.844387                         | -0.497802 | 3.642401  |
| 105                   | 1    | 0    | 8.547908                         | -0.138284 | 1.415872  |
| 106                   | 1    | 0    | 8.128483                         | -1.469962 | 2.480211  |
| 107                   | 1    | 0    | 7.867658                         | -1.620252 | 0.730456  |
| 108                   | 1    | 0    | -2.560749                        | -0.742947 | 0.841572  |
| 109                   | 1    | 0    | -3.263224                        | -2.398857 | 0.93065   |
| 110                   | 1    | 0    | -2.602861                        | -1.735444 | -1.765567 |
| 111                   | 1    | 0    | -5.862151                        | 2.344317  | 2.423116  |
| 112                   | 1    | 0    | -6.747601                        | 3.549617  | 1.466423  |
| 113                   | 1    | 0    | -5.104221                        | 3.868066  | 1.978885  |
| <b>1h<sub>3</sub></b> |      |      | Standard Orientation (Ångstroms) |           |           |
| No.                   | Atom | Type | X                                | Y         | Z         |
| 1                     | 6    | 0    | -4.110897                        | -0.398052 | 0.220524  |
| 2                     | 6    | 0    | -3.835255                        | -0.635584 | -1.31846  |
| 3                     | 6    | 0    | 8.532623                         | -2.440773 | 0.728539  |
| 4                     | 6    | 0    | 7.097718                         | -2.666968 | 0.203336  |
| 5                     | 6    | 0    | 6.540371                         | -1.382714 | -0.452092 |
| 6                     | 6    | 0    | 6.724491                         | -0.171015 | 0.495723  |
| 7                     | 8    | 0    | 8.103302                         | -0.040691 | 0.873449  |
| 8                     | 6    | 0    | 8.566828                         | -1.180502 | 1.597289  |
| 9                     | 6    | 0    | 6.264217                         | 1.147015  | -0.126616 |
| 10                    | 6    | 0    | 5.12113                          | 1.71753   | 0.312436  |
| 11                    | 6    | 0    | 4.512949                         | 2.946715  | -0.1501   |
| 12                    | 6    | 0    | 3.335095                         | 3.389156  | 0.319096  |
| 13                    | 6    | 0    | 2.72819                          | 4.623763  | -0.125394 |
| 14                    | 6    | 0    | 1.555583                         | 5.072238  | 0.347789  |

---

|    |   |   |           |           |           |
|----|---|---|-----------|-----------|-----------|
| 15 | 6 | 0 | 0.925743  | 6.366947  | -0.082435 |
| 16 | 6 | 0 | -0.419755 | 6.132922  | -0.768241 |
| 17 | 6 | 0 | 9.570456  | -2.348422 | -0.398048 |
| 18 | 8 | 0 | 7.042643  | -3.727744 | -0.765341 |
| 19 | 8 | 0 | 5.178642  | -1.547665 | -0.929546 |
| 20 | 6 | 0 | -1.062935 | 7.443522  | -1.193788 |
| 21 | 8 | 0 | -2.451964 | -0.97114  | -1.563016 |
| 22 | 6 | 0 | -2.816914 | -0.476765 | 1.065675  |
| 23 | 6 | 0 | 7.079803  | -5.02509  | -0.184652 |
| 24 | 6 | 0 | -0.154384 | -0.806038 | -1.20155  |
| 25 | 6 | 0 | 0.521425  | -0.995074 | -0.069998 |
| 26 | 6 | 0 | -1.462956 | -0.091311 | -1.047203 |
| 27 | 6 | 0 | -1.603681 | 0.209944  | 0.451832  |
| 28 | 6 | 0 | -0.312657 | -0.370682 | 0.999201  |
| 29 | 8 | 0 | -1.358747 | 1.156525  | -1.768109 |
| 30 | 6 | 0 | -1.413925 | 2.130444  | -0.789726 |
| 31 | 6 | 0 | -1.558212 | 1.706106  | 0.462626  |
| 32 | 8 | 0 | 0.051292  | -0.327588 | 2.169798  |
| 33 | 6 | 0 | -1.625517 | 2.525437  | 1.699778  |
| 34 | 6 | 0 | -4.223125 | 0.523765  | -2.257022 |
| 35 | 1 | 0 | -4.686938 | -1.259999 | 0.568175  |
| 36 | 6 | 0 | -4.588266 | -1.93061  | -1.806972 |
| 37 | 6 | 0 | -6.085223 | -1.940641 | -1.619611 |
| 38 | 6 | 0 | -7.192241 | -0.014928 | 1.500181  |
| 39 | 6 | 0 | -5.901962 | 0.739531  | 1.806938  |
| 40 | 6 | 0 | -4.980697 | 0.850912  | 0.563158  |
| 41 | 6 | 0 | -6.730522 | -2.793036 | -0.802206 |
| 42 | 6 | 0 | -8.20642  | -2.735245 | -0.395585 |
| 43 | 6 | 0 | -8.344088 | -2.294518 | 1.108416  |
| 44 | 6 | 0 | -7.258755 | -1.358884 | 1.58678   |
| 45 | 6 | 0 | -8.803426 | -4.148774 | -0.553224 |
| 46 | 6 | 0 | -9.041983 | -1.790415 | -1.286448 |
| 47 | 8 | 0 | -5.219611 | 0.142918  | 2.899437  |
| 48 | 6 | 0 | -8.324998 | 0.856955  | 1.029775  |
| 49 | 6 | 0 | 2.82825   | -1.704248 | -0.750859 |
| 50 | 6 | 0 | 4.172797  | -1.70725  | -0.030984 |
| 51 | 7 | 0 | 1.726994  | -1.580177 | 0.204558  |
| 52 | 8 | 0 | 4.317099  | -1.804073 | 1.181892  |
| 53 | 6 | 0 | 7.153129  | 1.700721  | -1.210995 |
| 54 | 1 | 0 | 8.821032  | -3.295276 | 1.3529    |
| 55 | 1 | 0 | 6.456199  | -2.944571 | 1.047785  |
| 56 | 1 | 0 | 7.120131  | -1.21329  | -1.367068 |

---

|    |   |   |           |           |           |
|----|---|---|-----------|-----------|-----------|
| 57 | 1 | 0 | 6.161699  | -0.326099 | 1.423553  |
| 58 | 1 | 0 | 9.590347  | -0.97008  | 1.925566  |
| 59 | 1 | 0 | 7.959938  | -1.309211 | 2.501884  |
| 60 | 1 | 0 | 4.569413  | 1.214686  | 1.109172  |
| 61 | 1 | 0 | 5.037968  | 3.53123   | -0.898794 |
| 62 | 1 | 0 | 2.79556   | 2.816245  | 1.071435  |
| 63 | 1 | 0 | 3.266419  | 5.205177  | -0.871437 |
| 64 | 1 | 0 | 1.0167    | 4.499583  | 1.10003   |
| 65 | 1 | 0 | 0.785927  | 6.995072  | 0.805661  |
| 66 | 1 | 0 | 1.592375  | 6.917427  | -0.757458 |
| 67 | 1 | 0 | -1.101349 | 5.604822  | -0.090987 |
| 68 | 1 | 0 | -0.284888 | 5.497095  | -1.651702 |
| 69 | 1 | 0 | 9.584548  | -3.26278  | -0.999558 |
| 70 | 1 | 0 | 9.380945  | -1.50399  | -1.067623 |
| 71 | 1 | 0 | 10.574764 | -2.218575 | 0.020033  |
| 72 | 1 | 0 | -1.242577 | 8.090969  | -0.329492 |
| 73 | 1 | 0 | -2.024279 | 7.253038  | -1.681187 |
| 74 | 1 | 0 | -0.424441 | 7.982565  | -1.900886 |
| 75 | 1 | 0 | -2.976667 | -0.106916 | 2.083094  |
| 76 | 1 | 0 | -2.582884 | -1.544649 | 1.19263   |
| 77 | 1 | 0 | 6.992345  | -5.76058  | -0.989027 |
| 78 | 1 | 0 | 6.239645  | -5.162954 | 0.502619  |
| 79 | 1 | 0 | 8.026211  | -5.195724 | 0.334723  |
| 80 | 1 | 0 | 0.183947  | -1.135617 | -2.17247  |
| 81 | 1 | 0 | -1.331238 | 3.139645  | -1.158765 |
| 82 | 1 | 0 | -0.773392 | 2.31279   | 2.351837  |
| 83 | 1 | 0 | -2.545258 | 2.321733  | 2.255257  |
| 84 | 1 | 0 | -1.608533 | 3.595448  | 1.468822  |
| 85 | 1 | 0 | -5.304615 | 0.63545   | -2.37258  |
| 86 | 1 | 0 | -3.798137 | 0.369352  | -3.255885 |
| 87 | 1 | 0 | -3.843073 | 1.484322  | -1.902315 |
| 88 | 1 | 0 | -4.375512 | -2.088726 | -2.873229 |
| 89 | 1 | 0 | -4.141074 | -2.800129 | -1.304418 |
| 90 | 1 | 0 | -6.633898 | -1.16578  | -2.14532  |
| 91 | 1 | 0 | -6.162131 | 1.754801  | 2.130511  |
| 92 | 1 | 0 | -5.626112 | 1.118871  | -0.277895 |
| 93 | 1 | 0 | -4.317316 | 1.708232  | 0.712915  |
| 94 | 1 | 0 | -6.14064  | -3.547137 | -0.279158 |
| 95 | 1 | 0 | -9.337749 | -1.872714 | 1.299256  |
| 96 | 1 | 0 | -8.289059 | -3.182094 | 1.754419  |
| 97 | 1 | 0 | -6.3742   | -1.888923 | 1.94485   |
| 98 | 1 | 0 | -9.855027 | -4.169706 | -0.244751 |

|     |   |   |            |           |           |
|-----|---|---|------------|-----------|-----------|
| 99  | 1 | 0 | -8.753673  | -4.48904  | -1.594379 |
| 100 | 1 | 0 | -8.265713  | -4.882911 | 0.058564  |
| 101 | 1 | 0 | -8.692541  | -0.755528 | -1.235712 |
| 102 | 1 | 0 | -10.095596 | -1.793473 | -0.983342 |
| 103 | 1 | 0 | -9.006069  | -2.099973 | -2.337788 |
| 104 | 1 | 0 | -5.888871  | -0.038084 | 3.581633  |
| 105 | 1 | 0 | -9.25423   | 0.304754  | 0.871173  |
| 106 | 1 | 0 | -8.539754  | 1.62783   | 1.777573  |
| 107 | 1 | 0 | -8.062545  | 1.352533  | 0.089918  |
| 108 | 1 | 0 | 2.821164   | -0.852427 | -1.440466 |
| 109 | 1 | 0 | 2.726892   | -2.638369 | -1.311324 |
| 110 | 1 | 0 | 2.028      | -1.423363 | 1.174288  |
| 111 | 1 | 0 | 7.261766   | 0.978627  | -2.025784 |
| 112 | 1 | 0 | 8.148135   | 1.924341  | -0.812824 |
| 113 | 1 | 0 | 6.775699   | 2.622458  | -1.658389 |

| <b>1h<sub>4</sub></b> |      |      | Standard Orientation (Ångstroms) |           |           |
|-----------------------|------|------|----------------------------------|-----------|-----------|
| No.                   | Atom | Type | X                                | Y         | Z         |
| 1                     | 6    | 0    | 3.231596                         | -0.897444 | -0.072014 |
| 2                     | 6    | 0    | 3.011864                         | 0.62745   | 0.285448  |
| 3                     | 6    | 0    | -5.75099                         | -3.171597 | -1.397704 |
| 4                     | 6    | 0    | -4.908462                        | -2.881409 | -0.142592 |
| 5                     | 6    | 0    | -4.96403                         | -1.390533 | 0.25078   |
| 6                     | 6    | 0    | -4.643094                        | -0.520642 | -0.986241 |
| 7                     | 8    | 0    | -5.481266                        | -0.85487  | -2.099807 |
| 8                     | 6    | 0    | -5.331246                        | -2.211179 | -2.509766 |
| 9                     | 6    | 0    | -4.79064                         | 0.976368  | -0.72451  |
| 10                    | 6    | 0    | -3.68453                         | 1.736759  | -0.582113 |
| 11                    | 6    | 0    | -3.617241                        | 3.1574    | -0.316239 |
| 12                    | 6    | 0    | -2.451127                        | 3.805196  | -0.166186 |
| 13                    | 6    | 0    | -2.366306                        | 5.221766  | 0.106454  |
| 14                    | 6    | 0    | -1.197363                        | 5.861399  | 0.263636  |
| 15                    | 6    | 0    | -1.083126                        | 7.331928  | 0.551297  |
| 16                    | 6    | 0    | -0.301209                        | 8.090793  | -0.523774 |
| 17                    | 6    | 0    | -7.258725                        | -3.075561 | -1.133345 |
| 18                    | 8    | 0    | -5.351093                        | -3.662244 | 0.980806  |
| 19                    | 8    | 0    | -3.942627                        | -1.192065 | 1.256194  |
| 20                    | 6    | 0    | -1.008584                        | 8.120401  | -1.871517 |
| 21                    | 8    | 0    | 1.79948                          | 0.823487  | 1.045013  |
| 22                    | 6    | 0    | 2.046798                         | -1.782772 | 0.383862  |
| 23                    | 6    | 0    | -4.831983                        | -4.985848 | 0.982581  |
| 24                    | 6    | 0    | -0.4211                          | 0.393274  | 1.607611  |
| 25                    | 6    | 0    | -0.968052                        | -0.764403 | 1.972261  |
| 26                    | 6    | 0    | 0.59526                          | 0.296077  | 0.50887   |

|    |   |   |           |           |           |
|----|---|---|-----------|-----------|-----------|
| 27 | 6 | 0 | 0.666473  | -1.190719 | 0.131436  |
| 28 | 6 | 0 | -0.364869 | -1.789503 | 1.068953  |
| 29 | 8 | 0 | 0.086047  | 1.039343  | -0.620998 |
| 30 | 6 | 0 | -0.138895 | 0.087065  | -1.59651  |
| 31 | 6 | 0 | 0.153717  | -1.169685 | -1.275166 |
| 32 | 8 | 0 | -0.718782 | -2.964297 | 1.089567  |
| 33 | 6 | 0 | -0.012131 | -2.38432  | -2.114012 |
| 34 | 6 | 0 | 2.994365  | 1.602104  | -0.908389 |
| 35 | 1 | 0 | 4.05669   | -1.246244 | 0.554947  |
| 36 | 6 | 0 | 4.123348  | 1.110372  | 1.292318  |
| 37 | 6 | 0 | 5.550935  | 0.964586  | 0.827116  |
| 38 | 6 | 0 | 6.061633  | -2.080322 | -1.439032 |
| 39 | 6 | 0 | 4.606319  | -2.405645 | -1.761741 |
| 40 | 6 | 0 | 3.672273  | -1.186485 | -1.54046  |
| 41 | 6 | 0 | 6.447431  | 0.147989  | 1.410717  |
| 42 | 6 | 0 | 7.83861   | -0.215791 | 0.882066  |
| 43 | 6 | 0 | 7.860947  | -1.705684 | 0.377172  |
| 44 | 6 | 0 | 6.547031  | -2.194111 | -0.186153 |
| 45 | 6 | 0 | 8.845562  | -0.071564 | 2.041559  |
| 46 | 6 | 0 | 8.31766   | 0.717938  | -0.250686 |
| 47 | 8 | 0 | 4.166069  | -3.531582 | -1.017469 |
| 48 | 6 | 0 | 6.855501  | -1.559856 | -2.606701 |
| 49 | 6 | 0 | -3.054212 | -0.249504 | 3.266932  |
| 50 | 6 | 0 | -4.232711 | -0.366222 | 2.29809   |
| 51 | 7 | 0 | -1.910396 | -1.106365 | 2.911614  |
| 52 | 8 | 0 | -5.297627 | 0.217326  | 2.460943  |
| 53 | 6 | 0 | -6.20894  | 1.481698  | -0.634133 |
| 54 | 1 | 0 | -5.552978 | -4.196828 | -1.733095 |
| 55 | 1 | 0 | -3.857103 | -3.134498 | -0.343785 |
| 56 | 1 | 0 | -5.958243 | -1.177183 | 0.659837  |
| 57 | 1 | 0 | -3.603363 | -0.715634 | -1.287356 |
| 58 | 1 | 0 | -5.952365 | -2.360186 | -3.39954  |
| 59 | 1 | 0 | -4.291    | -2.385994 | -2.810601 |
| 60 | 1 | 0 | -2.714675 | 1.248214  | -0.664572 |
| 61 | 1 | 0 | -4.547216 | 3.711056  | -0.23443  |
| 62 | 1 | 0 | -1.510712 | 3.263709  | -0.248668 |
| 63 | 1 | 0 | -3.300216 | 5.775213  | 0.182012  |
| 64 | 1 | 0 | -0.260781 | 5.311347  | 0.19388   |
| 65 | 1 | 0 | -2.073689 | 7.786928  | 0.674098  |
| 66 | 1 | 0 | -0.56523  | 7.448677  | 1.51106   |
| 67 | 1 | 0 | 0.695963  | 7.651345  | -0.647166 |
| 68 | 1 | 0 | -0.152467 | 9.12291   | -0.184392 |
| 69 | 1 | 0 | -7.55863  | -2.075616 | -0.805116 |
| 70 | 1 | 0 | -7.820569 | -3.306253 | -2.045135 |

---

|     |   |   |           |           |           |
|-----|---|---|-----------|-----------|-----------|
| 71  | 1 | 0 | -7.571547 | -3.792383 | -0.367374 |
| 72  | 1 | 0 | -1.103654 | 7.116899  | -2.297265 |
| 73  | 1 | 0 | -0.440258 | 8.730789  | -2.580542 |
| 74  | 1 | 0 | -2.009869 | 8.552996  | -1.77924  |
| 75  | 1 | 0 | 2.103678  | -2.7867   | -0.04784  |
| 76  | 1 | 0 | 2.163453  | -1.939936 | 1.466829  |
| 77  | 1 | 0 | -5.165377 | -5.539104 | 0.100707  |
| 78  | 1 | 0 | -5.206881 | -5.49781  | 1.872964  |
| 79  | 1 | 0 | -3.738786 | -4.968494 | 1.028263  |
| 80  | 1 | 0 | -0.654672 | 1.34478   | 2.062523  |
| 81  | 1 | 0 | -0.536294 | 0.476927  | -2.52044  |
| 82  | 1 | 0 | -0.736852 | -3.069298 | -1.664251 |
| 83  | 1 | 0 | 0.937727  | -2.913478 | -2.230375 |
| 84  | 1 | 0 | -0.37476  | -2.128275 | -3.11509  |
| 85  | 1 | 0 | 3.983128  | 1.753171  | -1.350017 |
| 86  | 1 | 0 | 2.617003  | 2.583932  | -0.598521 |
| 87  | 1 | 0 | 2.33956   | 1.256677  | -1.71133  |
| 88  | 1 | 0 | 3.949479  | 2.166735  | 1.53934   |
| 89  | 1 | 0 | 3.982285  | 0.57772   | 2.243706  |
| 90  | 1 | 0 | 5.818049  | 1.521547  | -0.065318 |
| 91  | 1 | 0 | 4.542008  | -2.697039 | -2.817308 |
| 92  | 1 | 0 | 4.184422  | -0.321281 | -1.970599 |
| 93  | 1 | 0 | 2.776519  | -1.334899 | -2.151139 |
| 94  | 1 | 0 | 6.135054  | -0.406506 | 2.29671   |
| 95  | 1 | 0 | 8.676333  | -1.859928 | -0.33918  |
| 96  | 1 | 0 | 8.099252  | -2.37173  | 1.218483  |
| 97  | 1 | 0 | 5.880268  | -2.587952 | 0.583106  |
| 98  | 1 | 0 | 9.856628  | -0.350726 | 1.723241  |
| 99  | 1 | 0 | 8.88429   | 0.960363  | 2.410322  |
| 100 | 1 | 0 | 8.577699  | -0.713566 | 2.889127  |
| 101 | 1 | 0 | 7.662181  | 0.679783  | -1.125084 |
| 102 | 1 | 0 | 9.324751  | 0.444466  | -0.58653  |
| 103 | 1 | 0 | 8.359893  | 1.761092  | 0.085062  |
| 104 | 1 | 0 | 4.876141  | -4.194576 | -1.068707 |
| 105 | 1 | 0 | 7.907489  | -1.387507 | -2.36776  |
| 106 | 1 | 0 | 6.833173  | -2.284616 | -3.427628 |
| 107 | 1 | 0 | 6.432801  | -0.617193 | -2.967944 |
| 108 | 1 | 0 | -2.748768 | 0.800258  | 3.321385  |
| 109 | 1 | 0 | -3.412291 | -0.56511  | 4.252163  |
| 110 | 1 | 0 | -2.203177 | -2.079004 | 2.763844  |
| 111 | 1 | 0 | -6.283199 | 2.514977  | -0.289169 |
| 112 | 1 | 0 | -6.692651 | 1.429347  | -1.614927 |
| 113 | 1 | 0 | -6.793032 | 0.878851  | 0.067514  |

---

Table S13. Gibbs free energies <sup>a</sup> and equilibrium populations <sup>b</sup> of low-energy conformers of **1i**

| Conformers            | In MeOH       |        |
|-----------------------|---------------|--------|
|                       | G             | P (%)  |
| <b>1i<sub>1</sub></b> | −2331.9030703 | 67.64% |
| <b>1i<sub>2</sub></b> | −2331.8963299 | 0.05%  |
| <b>1i<sub>3</sub></b> | −2331.8960539 | 0.04%  |
| <b>1i<sub>4</sub></b> | −2331.9023723 | 32.27% |

<sup>a</sup> B3LYP/6-31+g (d, p), in kcal/mol; <sup>b</sup> from G values at 298.15KTable S14. Cartesian coordinates for the low-energy reoptimized MMFF conformers of **1i** at B3LYP/6-31+g (d, p) level of theory in MeOH

| <b>1i<sub>1</sub></b> |      |      | Standard Orientation (Ångstroms) |           |           |
|-----------------------|------|------|----------------------------------|-----------|-----------|
| No.                   | Atom | Type | X                                | Y         | Z         |
| 1                     | 6    | 0    | −3.271735                        | −1.365477 | −0.453684 |
| 2                     | 6    | 0    | −2.669781                        | −0.125518 | −1.173855 |
| 3                     | 6    | 0    | 7.864742                         | −0.57983  | 1.370437  |
| 4                     | 6    | 0    | 6.956263                         | −1.036002 | 0.209788  |
| 5                     | 6    | 0    | 6.079396                         | 0.131519  | −0.303445 |
| 6                     | 6    | 0    | 5.374785                         | 0.858217  | 0.869507  |
| 7                     | 8    | 0    | 6.327423                         | 1.242765  | 1.872617  |
| 8                     | 6    | 0    | 7.01116                          | 0.121934  | 2.428488  |
| 9                     | 6    | 0    | 4.638306                         | 2.122076  | 0.423658  |
| 10                    | 6    | 0    | 3.293775                         | 2.190726  | 0.535575  |
| 11                    | 6    | 0    | 2.443883                         | 3.295886  | 0.142112  |
| 12                    | 6    | 0    | 1.112376                         | 3.288692  | 0.311962  |
| 13                    | 6    | 0    | 0.267958                         | 4.399272  | −0.066969 |
| 14                    | 6    | 0    | −1.064483                        | 4.389675  | 0.091401  |
| 15                    | 6    | 0    | −1.951808                        | 5.548732  | −0.267196 |
| 16                    | 6    | 0    | −3.011352                        | 5.200334  | −1.3146   |
| 17                    | 6    | 0    | 9.013401                         | 0.32561   | 0.908082  |
| 18                    | 8    | 0    | 7.714673                         | −1.547742 | −0.899877 |
| 19                    | 8    | 0    | 5.161836                         | −0.275678 | −1.354419 |
| 20                    | 6    | 0    | −2.421195                        | 4.837143  | −2.669992 |
| 21                    | 8    | 0    | −1.514973                        | 0.333038  | −0.458474 |
| 22                    | 6    | 0    | −2.253884                        | −2.510225 | −0.420313 |
| 23                    | 6    | 0    | 8.204872                         | −2.86582  | −0.689751 |
| 24                    | 6    | 0    | 0.616965                         | −0.589252 | −0.961586 |
| 25                    | 6    | 0    | 1.086013                         | −1.799452 | −1.262036 |
| 26                    | 6    | 0    | −0.537587                        | −0.59137  | −0.010959 |
| 27                    | 6    | 0    | −0.927274                        | −2.076205 | 0.19803   |
| 28                    | 6    | 0    | 0.227396                         | −2.766606 | −0.508485 |

|    |   |   |           |           |           |
|----|---|---|-----------|-----------|-----------|
| 29 | 8 | 0 | -0.024319 | -0.094345 | 1.257895  |
| 30 | 6 | 0 | -0.321691 | -1.076138 | 2.174641  |
| 31 | 6 | 0 | -0.822218 | -2.206656 | 1.687718  |
| 32 | 8 | 0 | 0.451434  | -3.972411 | -0.505863 |
| 33 | 6 | 0 | -1.172993 | -3.432587 | 2.449337  |
| 34 | 6 | 0 | -2.277864 | -0.395401 | -2.637921 |
| 35 | 1 | 0 | -3.426452 | -1.074104 | 0.594121  |
| 36 | 6 | 0 | -3.637053 | 1.108612  | -1.182398 |
| 37 | 6 | 0 | -4.375011 | 1.326479  | 0.119407  |
| 38 | 6 | 0 | -6.958843 | -2.092089 | -0.04436  |
| 39 | 6 | 0 | -5.500793 | -2.507223 | 0.058634  |
| 40 | 6 | 0 | -4.621108 | -1.862398 | -1.034652 |
| 41 | 6 | 0 | -5.707257 | 1.180274  | 0.219724  |
| 42 | 6 | 0 | -6.564868 | 1.155814  | 1.478698  |
| 43 | 6 | 0 | -6.907049 | -0.328637 | 1.838858  |
| 44 | 6 | 0 | -7.541939 | -1.15265  | 0.735393  |
| 45 | 6 | 0 | -7.852157 | 1.958585  | 1.204104  |
| 46 | 6 | 0 | -5.864321 | 1.79425   | 2.69622   |
| 47 | 8 | 0 | -5.402904 | -3.925455 | -0.046258 |
| 48 | 6 | 0 | -7.754771 | -2.755884 | -1.142515 |
| 49 | 6 | 0 | 3.324793  | -1.407428 | -2.310917 |
| 50 | 6 | 0 | 4.186172  | -1.179819 | -1.069471 |
| 51 | 7 | 0 | 2.139831  | -2.227755 | -2.032674 |
| 52 | 8 | 0 | 4.033064  | -1.726263 | 0.015284  |
| 53 | 6 | 0 | 5.513849  | 3.227647  | -0.114417 |
| 54 | 1 | 0 | 8.323989  | -1.46299  | 1.830982  |
| 55 | 1 | 0 | 6.311881  | -1.841626 | 0.577156  |
| 56 | 1 | 0 | 6.756951  | 0.833256  | -0.804713 |
| 57 | 1 | 0 | 4.655932  | 0.186829  | 1.353307  |
| 58 | 1 | 0 | 7.642149  | 0.490442  | 3.244368  |
| 59 | 1 | 0 | 6.282603  | -0.568023 | 2.871392  |
| 60 | 1 | 0 | 2.76394   | 1.335982  | 0.960249  |
| 61 | 1 | 0 | 2.910138  | 4.166041  | -0.309055 |
| 62 | 1 | 0 | 0.621017  | 2.429442  | 0.763698  |
| 63 | 1 | 0 | 0.753975  | 5.27688   | -0.488001 |
| 64 | 1 | 0 | -1.556556 | 3.515437  | 0.514638  |
| 65 | 1 | 0 | -2.458914 | 5.880057  | 0.647155  |
| 66 | 1 | 0 | -1.358485 | 6.401411  | -0.619658 |
| 67 | 1 | 0 | -3.673223 | 6.065361  | -1.442375 |
| 68 | 1 | 0 | -3.638782 | 4.376148  | -0.956327 |
| 69 | 1 | 0 | 8.652973  | 1.250516  | 0.447743  |
| 70 | 1 | 0 | 9.643685  | 0.604906  | 1.759581  |
| 71 | 1 | 0 | 9.653747  | -0.186943 | 0.183306  |
| 72 | 1 | 0 | -3.223479 | 4.655231  | -3.392173 |



|                       |      |      |                                  |           |           |
|-----------------------|------|------|----------------------------------|-----------|-----------|
| 73                    | 1    | 0    | -1.811459                        | 3.930172  | -2.614132 |
| 74                    | 1    | 0    | -1.79656                         | 5.649349  | -3.055114 |
| 75                    | 1    | 0    | -2.670733                        | -3.362216 | 0.129649  |
| 76                    | 1    | 0    | -2.097943                        | -2.893445 | -1.437152 |
| 77                    | 1    | 0    | 7.3788                           | -3.55851  | -0.503112 |
| 78                    | 1    | 0    | 8.72419                          | -3.184287 | -1.597752 |
| 79                    | 1    | 0    | 8.916747                         | -2.892378 | 0.139213  |
| 80                    | 1    | 0    | 1.035286                         | 0.337886  | -1.324157 |
| 81                    | 1    | 0    | -0.077366                        | -0.828762 | 3.195205  |
| 82                    | 1    | 0    | -2.248925                        | -3.624706 | 2.401598  |
| 83                    | 1    | 0    | -0.901367                        | -3.335809 | 3.505849  |
| 84                    | 1    | 0    | -0.644283                        | -4.302951 | 2.049982  |
| 85                    | 1    | 0    | -1.829757                        | 0.499961  | -3.085179 |
| 86                    | 1    | 0    | -3.146019                        | -0.680694 | -3.240878 |
| 87                    | 1    | 0    | -1.528381                        | -1.184001 | -2.736646 |
| 88                    | 1    | 0    | -3.059827                        | 2.018365  | -1.387234 |
| 89                    | 1    | 0    | -4.35795                         | 1.01277   | -2.004265 |
| 90                    | 1    | 0    | -3.755705                        | 1.518721  | 0.991875  |
| 91                    | 1    | 0    | -5.113045                        | -2.268584 | 1.051154  |
| 92                    | 1    | 0    | -4.434907                        | -2.575883 | -1.84778  |
| 93                    | 1    | 0    | -5.160217                        | -1.027873 | -1.488802 |
| 94                    | 1    | 0    | -6.258728                        | 0.966466  | -0.697798 |
| 95                    | 1    | 0    | -6.002918                        | -0.821964 | 2.211684  |
| 96                    | 1    | 0    | -7.602026                        | -0.339678 | 2.690043  |
| 97                    | 1    | 0    | -8.592859                        | -0.919204 | 0.563089  |
| 98                    | 1    | 0    | -8.528431                        | 1.926142  | 2.065971  |
| 99                    | 1    | 0    | -7.624673                        | 3.012015  | 1.000693  |
| 100                   | 1    | 0    | -8.40252                         | 1.572155  | 0.338818  |
| 101                   | 1    | 0    | -6.531737                        | 1.81489   | 3.565804  |
| 102                   | 1    | 0    | -5.562419                        | 2.82733   | 2.487608  |
| 103                   | 1    | 0    | -4.969077                        | 1.234559  | 2.990253  |
| 104                   | 1    | 0    | -6.002336                        | -4.292748 | 0.626065  |
| 105                   | 1    | 0    | -8.760929                        | -2.333406 | -1.236857 |
| 106                   | 1    | 0    | -7.25608                         | -2.627943 | -2.108578 |
| 107                   | 1    | 0    | -7.866534                        | -3.826666 | -0.94492  |
| 108                   | 1    | 0    | 3.93709                          | -1.924529 | -3.056704 |
| 109                   | 1    | 0    | 3.01778                          | -0.438086 | -2.718177 |
| 110                   | 1    | 0    | 2.375969                         | -3.194177 | -1.783381 |
| 111                   | 1    | 0    | 5.864757                         | 2.978411  | -1.120515 |
| 112                   | 1    | 0    | 5.008699                         | 4.194353  | -0.169339 |
| 113                   | 1    | 0    | 6.388174                         | 3.380832  | 0.526481  |
| <b>Ii<sub>2</sub></b> |      |      | Standard Orientation (Ångstroms) |           |           |
| No.                   | Atom | Type | X                                | Y         | Z         |

|    |   |   |           |           |           |
|----|---|---|-----------|-----------|-----------|
| 1  | 6 | 0 | 3.07273   | -0.730019 | 0.256886  |
| 2  | 6 | 0 | 2.616505  | -0.466821 | -1.206067 |
| 3  | 6 | 0 | -8.68077  | 0.174683  | -0.396242 |
| 4  | 6 | 0 | -7.457774 | -0.711845 | -0.073677 |
| 5  | 6 | 0 | -6.316706 | 0.125747  | 0.54768   |
| 6  | 6 | 0 | -6.028455 | 1.373932  | -0.322761 |
| 7  | 8 | 0 | -7.229904 | 2.136281  | -0.512519 |
| 8  | 6 | 0 | -8.229908 | 1.392061  | -1.20774  |
| 9  | 6 | 0 | -4.968569 | 2.294256  | 0.280755  |
| 10 | 6 | 0 | -3.796872 | 2.470873  | -0.367498 |
| 11 | 6 | 0 | -2.663217 | 3.260378  | 0.066912  |
| 12 | 6 | 0 | -1.556986 | 3.407635  | -0.679457 |
| 13 | 6 | 0 | -0.416035 | 4.185633  | -0.250325 |
| 14 | 6 | 0 | 0.678165  | 4.351611  | -1.008712 |
| 15 | 6 | 0 | 1.877218  | 5.152681  | -0.58515  |
| 16 | 6 | 0 | 3.116285  | 4.265683  | -0.461481 |
| 17 | 6 | 0 | -9.443769 | 0.615513  | 0.859936  |
| 18 | 8 | 0 | -7.790182 | -1.769518 | 0.840738  |
| 19 | 8 | 0 | -5.134882 | -0.667152 | 0.834034  |
| 20 | 6 | 0 | 4.345883  | 5.070217  | -0.072043 |
| 21 | 8 | 0 | 2.247816  | -1.707559 | -1.822793 |
| 22 | 6 | 0 | 1.92943   | -1.339972 | 1.073123  |
| 23 | 6 | 0 | -8.465894 | -2.858441 | 0.225457  |
| 24 | 6 | 0 | 0.001749  | -2.453829 | -1.621389 |
| 25 | 6 | 0 | -0.920223 | -2.42199  | -0.659586 |
| 26 | 6 | 0 | 1.406532  | -2.62383  | -1.138756 |
| 27 | 6 | 0 | 1.33904   | -2.582332 | 0.407716  |
| 28 | 6 | 0 | -0.166854 | -2.606571 | 0.625019  |
| 29 | 8 | 0 | 1.819313  | -3.964461 | -1.523609 |
| 30 | 6 | 0 | 2.203778  | -4.570311 | -0.34911  |
| 31 | 6 | 0 | 1.978067  | -3.889013 | 0.769475  |
| 32 | 8 | 0 | -0.713979 | -2.722549 | 1.716566  |
| 33 | 6 | 0 | 2.246289  | -4.336424 | 2.160156  |
| 34 | 6 | 0 | 1.438422  | 0.518821  | -1.310203 |
| 35 | 1 | 0 | 3.850955  | -1.503891 | 0.208902  |
| 36 | 6 | 0 | 3.762991  | 0.100827  | -2.116593 |
| 37 | 6 | 0 | 5.120885  | -0.520668 | -1.876795 |
| 38 | 6 | 0 | 5.902712  | 1.062789  | 2.02631   |
| 39 | 6 | 0 | 4.714877  | 0.115505  | 2.026506  |
| 40 | 6 | 0 | 3.645879  | 0.512584  | 0.98684   |
| 41 | 6 | 0 | 6.148883  | 0.179349  | -1.365952 |
| 42 | 6 | 0 | 7.50214   | -0.333694 | -0.889372 |
| 43 | 6 | 0 | 7.49132   | -0.451491 | 0.67103   |

|    |   |   |            |           |           |
|----|---|---|------------|-----------|-----------|
| 44 | 6 | 0 | 7.089037   | 0.796241  | 1.433203  |
| 45 | 6 | 0 | 8.5864     | 0.661399  | -1.349526 |
| 46 | 6 | 0 | 7.858386   | -1.717718 | -1.4709   |
| 47 | 8 | 0 | 4.119708   | 0.101321  | 3.321433  |
| 48 | 6 | 0 | 5.677087   | 2.399162  | 2.691425  |
| 49 | 6 | 0 | -3.156246  | -1.866439 | 0.346625  |
| 50 | 6 | 0 | -4.412566  | -1.188183 | -0.190124 |
| 51 | 7 | 0 | -2.273612  | -2.255993 | -0.758695 |
| 52 | 8 | 0 | -4.7009    | -1.099778 | -1.37891  |
| 53 | 6 | 0 | -5.337764  | 2.943211  | 1.590759  |
| 54 | 1 | 0 | -9.386125  | -0.402123 | -1.006725 |
| 55 | 1 | 0 | -7.100687  | -1.167003 | -1.00476  |
| 56 | 1 | 0 | -6.661959  | 0.450669  | 1.536593  |
| 57 | 1 | 0 | -5.692076  | 1.066923  | -1.319803 |
| 58 | 1 | 0 | -9.075306  | 2.064136  | -1.390562 |
| 59 | 1 | 0 | -7.842679  | 1.089802  | -2.188502 |
| 60 | 1 | 0 | -3.655716  | 1.960944  | -1.321869 |
| 61 | 1 | 0 | -2.715009  | 3.74131   | 1.038899  |
| 62 | 1 | 0 | -1.491482  | 2.933576  | -1.656726 |
| 63 | 1 | 0 | -0.46552   | 4.646708  | 0.734437  |
| 64 | 1 | 0 | 0.729869   | 3.899811  | -1.997379 |
| 65 | 1 | 0 | 2.051865   | 5.936297  | -1.332107 |
| 66 | 1 | 0 | 1.689619   | 5.659687  | 0.369195  |
| 67 | 1 | 0 | 3.311056   | 3.753053  | -1.411386 |
| 68 | 1 | 0 | 2.943754   | 3.490476  | 0.294025  |
| 69 | 1 | 0 | -8.826168  | 1.223453  | 1.527922  |
| 70 | 1 | 0 | -10.317945 | 1.215131  | 0.582818  |
| 71 | 1 | 0 | -9.808037  | -0.247921 | 1.425545  |
| 72 | 1 | 0 | 5.218741   | 4.414023  | 0.004212  |
| 73 | 1 | 0 | 4.203425   | 5.559987  | 0.89651   |
| 74 | 1 | 0 | 4.564026   | 5.840154  | -0.818848 |
| 75 | 1 | 0 | 2.282706   | -1.579125 | 2.08313   |
| 76 | 1 | 0 | 1.150222   | -0.582622 | 1.231463  |
| 77 | 1 | 0 | -7.851498  | -3.292846 | -0.56886  |
| 78 | 1 | 0 | -8.639983  | -3.624546 | 0.985924  |
| 79 | 1 | 0 | -9.43408   | -2.544559 | -0.173281 |
| 80 | 1 | 0 | -0.218557  | -2.373169 | -2.675732 |
| 81 | 1 | 0 | 2.618001   | -5.558643 | -0.46734  |
| 82 | 1 | 0 | 3.011752   | -3.710884 | 2.628772  |
| 83 | 1 | 0 | 2.606133   | -5.37064  | 2.182688  |
| 84 | 1 | 0 | 1.336879   | -4.289414 | 2.766279  |
| 85 | 1 | 0 | 1.131443   | 0.642613  | -2.355483 |
| 86 | 1 | 0 | 1.707018   | 1.501492  | -0.913415 |

| 87                    | 1    | 0    | 0.549185                         | 0.17875   | -0.775142 |
|-----------------------|------|------|----------------------------------|-----------|-----------|
| 88                    | 1    | 0    | 3.508755                         | -0.067952 | -3.171637 |
| 89                    | 1    | 0    | 3.831981                         | 1.188865  | -1.990532 |
| 90                    | 1    | 0    | 5.195722                         | -1.589069 | -2.063104 |
| 91                    | 1    | 0    | 5.050982                         | -0.90908  | 1.855255  |
| 92                    | 1    | 0    | 2.831647                         | 1.069251  | 1.468355  |
| 93                    | 1    | 0    | 4.085818                         | 1.198665  | 0.26005   |
| 94                    | 1    | 0    | 5.989933                         | 1.244383  | -1.186237 |
| 95                    | 1    | 0    | 6.856956                         | -1.296426 | 0.960025  |
| 96                    | 1    | 0    | 8.497147                         | -0.728758 | 1.015946  |
| 97                    | 1    | 0    | 7.869586                         | 1.556197  | 1.475382  |
| 98                    | 1    | 0    | 9.576331                         | 0.361409  | -0.986968 |
| 99                    | 1    | 0    | 8.636081                         | 0.71328   | -2.443797 |
| 100                   | 1    | 0    | 8.395837                         | 1.676852  | -0.984167 |
| 101                   | 1    | 0    | 8.862542                         | -2.02729  | -1.158283 |
| 102                   | 1    | 0    | 7.843044                         | -1.707032 | -2.566968 |
| 103                   | 1    | 0    | 7.161955                         | -2.493072 | -1.131698 |
| 104                   | 1    | 0    | 4.832779                         | -0.108166 | 3.949031  |
| 105                   | 1    | 0    | 6.518849                         | 3.083527  | 2.539994  |
| 106                   | 1    | 0    | 4.785159                         | 2.885559  | 2.284137  |
| 107                   | 1    | 0    | 5.544694                         | 2.274466  | 3.770695  |
| 108                   | 1    | 0    | -3.449666                        | -2.752673 | 0.91681   |
| 109                   | 1    | 0    | -2.64982                         | -1.142259 | 0.994207  |
| 110                   | 1    | 0    | -2.63108                         | -2.021345 | -1.685297 |
| 111                   | 1    | 0    | -5.327783                        | 2.204188  | 2.397765  |
| 112                   | 1    | 0    | -4.664982                        | 3.754689  | 1.87717   |
| 113                   | 1    | 0    | -6.339406                        | 3.382229  | 1.537692  |
| <b>Ii<sub>3</sub></b> |      |      | Standard Orientation (Ångstroms) |           |           |
| No.                   | Atom | Type | X                                | Y         | Z         |
| 1                     | 6    | 0    | 3.165378                         | -0.50796  | 0.078859  |
| 2                     | 6    | 0    | 2.234777                         | -1.163191 | -0.980725 |
| 3                     | 6    | 0    | -0.953023                        | 4.562777  | -0.301182 |
| 4                     | 6    | 0    | -0.971072                        | 3.300721  | 0.588081  |
| 5                     | 6    | 0    | -1.88324                         | 2.208603  | -0.015868 |
| 6                     | 6    | 0    | -3.26424                         | 2.793046  | -0.398308 |
| 7                     | 8    | 0    | -3.110118                        | 3.937206  | -1.250696 |
| 8                     | 6    | 0    | -2.389643                        | 4.988613  | -0.609235 |
| 9                     | 6    | 0    | -4.152071                        | 1.779899  | -1.121295 |
| 10                    | 6    | 0    | -5.275363                        | 1.334909  | -0.518344 |
| 11                    | 6    | 0    | -6.212325                        | 0.354134  | -1.023877 |
| 12                    | 6    | 0    | -7.303453                        | -0.022578 | -0.338521 |
| 13                    | 6    | 0    | -8.24131                         | -1.006588 | -0.833799 |
| 14                    | 6    | 0    | -9.328891                        | -1.383591 | -0.143445 |

---

|    |   |   |            |           |           |
|----|---|---|------------|-----------|-----------|
| 15 | 6 | 0 | -10.368464 | -2.392262 | -0.559255 |
| 16 | 6 | 0 | -10.16885  | -3.067591 | -1.919023 |
| 17 | 6 | 0 | -0.156263  | 4.363946  | -1.597923 |
| 18 | 8 | 0 | 0.35001    | 2.75594   | 0.740297  |
| 19 | 8 | 0 | -1.977     | 1.024573  | 0.819624  |
| 20 | 6 | 0 | -11.284361 | -4.059382 | -2.21449  |
| 21 | 8 | 0 | 1.734432   | -2.410737 | -0.480089 |
| 22 | 6 | 0 | 2.393253   | -0.230963 | 1.370311  |
| 23 | 6 | 0 | 1.112498   | 3.413666  | 1.746878  |
| 24 | 6 | 0 | -0.258061  | -2.443247 | 0.814599  |
| 25 | 6 | 0 | -0.809195  | -1.651932 | 1.735851  |
| 26 | 6 | 0 | 1.23521    | -2.503506 | 0.84493   |
| 27 | 6 | 0 | 1.684024   | -1.470572 | 1.905067  |
| 28 | 6 | 0 | 0.342033   | -1.070612 | 2.50298   |
| 29 | 8 | 0 | 1.58408    | -3.824777 | 1.346655  |
| 30 | 6 | 0 | 2.366605   | -3.592606 | 2.454616  |
| 31 | 6 | 0 | 2.480377   | -2.32693  | 2.842949  |
| 32 | 8 | 0 | 0.206191   | -0.329883 | 3.471237  |
| 33 | 6 | 0 | 3.215751   | -1.815538 | 4.027745  |
| 34 | 6 | 0 | 1.044687   | -0.273856 | -1.384676 |
| 35 | 1 | 0 | 3.924276   | -1.257623 | 0.340757  |
| 36 | 6 | 0 | 2.989598   | -1.545864 | -2.303237 |
| 37 | 6 | 0 | 4.366389   | -2.132864 | -2.081652 |
| 38 | 6 | 0 | 6.336721   | 1.410166  | -0.644749 |
| 39 | 6 | 0 | 5.238467   | 0.97095   | 0.309306  |
| 40 | 6 | 0 | 3.880665   | 0.782763  | -0.400248 |
| 41 | 6 | 0 | 5.487824   | -1.490135 | -2.450924 |
| 42 | 6 | 0 | 6.932741   | -1.83549  | -2.112066 |
| 43 | 6 | 0 | 7.422705   | -0.910786 | -0.947604 |
| 44 | 6 | 0 | 7.26749    | 0.581165  | -1.170648 |
| 45 | 6 | 0 | 7.791615   | -1.621079 | -3.374259 |
| 46 | 6 | 0 | 7.112398   | -3.301367 | -1.665512 |
| 47 | 8 | 0 | 5.093085   | 1.942344  | 1.343699  |
| 48 | 6 | 0 | 6.309149   | 2.863538  | -1.0533   |
| 49 | 6 | 0 | -2.659903  | -0.256469 | 2.738531  |
| 50 | 6 | 0 | -2.560597  | 1.102766  | 2.044598  |
| 51 | 7 | 0 | -2.13975   | -1.388949 | 1.958091  |
| 52 | 8 | 0 | -3.013173  | 2.135111  | 2.529065  |
| 53 | 6 | 0 | -3.674037  | 1.350767  | -2.486132 |
| 54 | 1 | 0 | -0.462841  | 5.376313  | 0.247456  |
| 55 | 1 | 0 | -1.347226  | 3.577402  | 1.579355  |
| 56 | 1 | 0 | -1.384161  | 1.850335  | -0.92403  |

---

|    |   |   |            |           |           |
|----|---|---|------------|-----------|-----------|
| 57 | 1 | 0 | -3.790177  | 3.137892  | 0.499421  |
| 58 | 1 | 0 | -2.395949  | 5.852635  | -1.282407 |
| 59 | 1 | 0 | -2.917461  | 5.288973  | 0.304173  |
| 60 | 1 | 0 | -5.521923  | 1.734172  | 0.466848  |
| 61 | 1 | 0 | -6.015663  | -0.094402 | -1.992545 |
| 62 | 1 | 0 | -7.51649   | 0.417301  | 0.633799  |
| 63 | 1 | 0 | -8.029592  | -1.439207 | -1.808413 |
| 64 | 1 | 0 | -9.516896  | -0.932028 | 0.830253  |
| 65 | 1 | 0 | -10.411079 | -3.164773 | 0.218768  |
| 66 | 1 | 0 | -11.34247  | -1.886876 | -0.552641 |
| 67 | 1 | 0 | -9.209634  | -3.598509 | -1.939963 |
| 68 | 1 | 0 | -10.146122 | -2.31426  | -2.715331 |
| 69 | 1 | 0 | -0.57799   | 3.573604  | -2.226428 |
| 70 | 1 | 0 | -0.152116  | 5.28752   | -2.187234 |
| 71 | 1 | 0 | 0.887049   | 4.108676  | -1.386428 |
| 72 | 1 | 0 | -11.123837 | -4.53076  | -3.189135 |
| 73 | 1 | 0 | -12.258274 | -3.559868 | -2.235102 |
| 74 | 1 | 0 | -11.318442 | -4.848831 | -1.456879 |
| 75 | 1 | 0 | 3.068419   | 0.183362  | 2.128029  |
| 76 | 1 | 0 | 1.665279   | 0.565703  | 1.188287  |
| 77 | 1 | 0 | 0.635536   | 3.293249  | 2.724088  |
| 78 | 1 | 0 | 2.102359   | 2.951962  | 1.786054  |
| 79 | 1 | 0 | 1.23795    | 4.474342  | 1.514336  |
| 80 | 1 | 0 | -0.821689  | -3.030438 | 0.104621  |
| 81 | 1 | 0 | 2.776758   | -4.479621 | 2.909719  |
| 82 | 1 | 0 | 4.053487   | -1.18218  | 3.721643  |
| 83 | 1 | 0 | 3.624415   | -2.636457 | 4.62658   |
| 84 | 1 | 0 | 2.553928   | -1.232048 | 4.674212  |
| 85 | 1 | 0 | 0.405626   | -0.793448 | -2.108595 |
| 86 | 1 | 0 | 1.376948   | 0.666943  | -1.83539  |
| 87 | 1 | 0 | 0.398315   | -0.029613 | -0.539509 |
| 88 | 1 | 0 | 2.402487   | -2.289865 | -2.858224 |
| 89 | 1 | 0 | 3.064937   | -0.666862 | -2.956005 |
| 90 | 1 | 0 | 4.401481   | -3.063131 | -1.520023 |
| 91 | 1 | 0 | 5.532561   | 0.052467  | 0.821808  |
| 92 | 1 | 0 | 3.233921   | 1.652449  | -0.227822 |
| 93 | 1 | 0 | 4.037793   | 0.740422  | -1.480352 |
| 94 | 1 | 0 | 5.37104    | -0.549706 | -2.992734 |
| 95 | 1 | 0 | 6.923597   | -1.212226 | -0.020369 |
| 96 | 1 | 0 | 8.489693   | -1.099837 | -0.764902 |
| 97 | 1 | 0 | 7.999645   | 0.999767  | -1.861461 |
| 98 | 1 | 0 | 8.851818   | -1.804886 | -3.165572 |

| 99                    | 1    | 0    | 7.489017                         | -2.302684 | -4.178269 |
|-----------------------|------|------|----------------------------------|-----------|-----------|
| 100                   | 1    | 0    | 7.704826                         | -0.600479 | -3.763909 |
| 101                   | 1    | 0    | 8.170005                         | -3.53015  | -1.488696 |
| 102                   | 1    | 0    | 6.74722                          | -3.999484 | -2.427643 |
| 103                   | 1    | 0    | 6.577169                         | -3.510961 | -0.732301 |
| 104                   | 1    | 0    | 5.975438                         | 2.054011  | 1.737624  |
| 105                   | 1    | 0    | 7.049084                         | 3.088989  | -1.8288   |
| 106                   | 1    | 0    | 5.326022                         | 3.130646  | -1.453888 |
| 107                   | 1    | 0    | 6.525671                         | 3.509401  | -0.196563 |
| 108                   | 1    | 0    | -3.726619                        | -0.444077 | 2.904914  |
| 109                   | 1    | 0    | -2.178324                        | -0.197833 | 3.717878  |
| 110                   | 1    | 0    | -2.732525                        | -1.641927 | 1.170486  |
| 111                   | 1    | 0    | -2.784988                        | 0.71871   | -2.397395 |
| 112                   | 1    | 0    | -4.420343                        | 0.788677  | -3.051471 |
| 113                   | 1    | 0    | -3.4187                          | 2.220727  | -3.099669 |
| <b>1i<sub>4</sub></b> |      |      | Standard Orientation (Ångstroms) |           |           |
| No.                   | Atom | Type | X                                | Y         | Z         |
| 1                     | 6    | 0    | -3.956604                        | -1.137547 | 0.028442  |
| 2                     | 6    | 0    | -3.62593                         | -1.301458 | -1.48242  |
| 3                     | 6    | 0    | 8.637733                         | -2.396765 | 0.465917  |
| 4                     | 6    | 0    | 7.111044                         | -2.530323 | 0.636332  |
| 5                     | 6    | 0    | 6.364547                         | -1.370587 | -0.055075 |
| 6                     | 6    | 0    | 6.97172                          | -0.024993 | 0.404854  |
| 7                     | 8    | 0    | 8.386324                         | 0.013803  | 0.187507  |
| 8                     | 6    | 0    | 9.074971                         | -1.001081 | 0.913536  |
| 9                     | 6    | 0    | 6.34176                          | 1.17689   | -0.295507 |
| 10                    | 6    | 0    | 5.427181                         | 1.920227  | 0.363808  |
| 11                    | 6    | 0    | 4.690229                         | 3.059601  | -0.138662 |
| 12                    | 6    | 0    | 3.738687                         | 3.672956  | 0.582865  |
| 13                    | 6    | 0    | 2.977047                         | 4.797751  | 0.089237  |
| 14                    | 6    | 0    | 2.022905                         | 5.401515  | 0.814151  |
| 15                    | 6    | 0    | 1.2179                           | 6.572308  | 0.323662  |
| 16                    | 6    | 0    | -0.267198                        | 6.248761  | 0.138382  |
| 17                    | 6    | 0    | 9.099816                         | -2.675628 | -0.970105 |
| 18                    | 8    | 0    | 6.617992                         | -3.767774 | 0.097134  |
| 19                    | 8    | 0    | 4.976065                         | -1.42325  | 0.357784  |
| 20                    | 6    | 0    | -0.991857                        | 5.946702  | 1.442744  |
| 21                    | 8    | 0    | -2.895765                        | -0.15849  | -1.946128 |
| 22                    | 6    | 0    | -2.667799                        | -1.032124 | 0.849179  |
| 23                    | 6    | 0    | 6.873717                         | -4.894002 | 0.925041  |
| 24                    | 6    | 0    | -0.528048                        | -0.090453 | -1.753046 |
| 25                    | 6    | 0    | 0.368058                         | -0.49999  | -0.855128 |
| 26                    | 6    | 0    | -1.827702                        | 0.373549  | -1.179187 |

---

|    |   |   |           |           |           |
|----|---|---|-----------|-----------|-----------|
| 27 | 6 | 0 | -1.754581 | 0.080327  | 0.339517  |
| 28 | 6 | 0 | -0.299528 | -0.343221 | 0.479369  |
| 29 | 8 | 0 | -1.858213 | 1.819282  | -1.344283 |
| 30 | 6 | 0 | -2.039569 | 2.321048  | -0.07626  |
| 31 | 6 | 0 | -1.994815 | 1.442505  | 0.919565  |
| 32 | 8 | 0 | 0.264281  | -0.559621 | 1.547357  |
| 33 | 6 | 0 | -2.106233 | 1.73046   | 2.372309  |
| 34 | 6 | 0 | -2.812941 | -2.570465 | -1.797152 |
| 35 | 1 | 0 | -4.458778 | -0.166527 | 0.136168  |
| 36 | 6 | 0 | -4.906769 | -1.3422   | -2.38931  |
| 37 | 6 | 0 | -5.982885 | -0.357854 | -1.987179 |
| 38 | 6 | 0 | -7.180035 | -2.188151 | 1.703476  |
| 39 | 6 | 0 | -5.744355 | -1.694899 | 1.768974  |
| 40 | 6 | 0 | -4.876194 | -2.24072  | 0.614583  |
| 41 | 6 | 0 | -7.172643 | -0.754216 | -1.503033 |
| 42 | 6 | 0 | -8.268554 | 0.094134  | -0.869479 |
| 43 | 6 | 0 | -8.190642 | -0.042527 | 0.68787   |
| 44 | 6 | 0 | -8.217103 | -1.45654  | 1.235148  |
| 45 | 6 | 0 | -9.630755 | -0.406066 | -1.390305 |
| 46 | 6 | 0 | -8.151446 | 1.591089  | -1.22405  |
| 47 | 8 | 0 | -5.164097 | -2.087902 | 3.010439  |
| 48 | 6 | 0 | -7.405525 | -3.61462  | 2.144045  |
| 49 | 6 | 0 | 2.658446  | -1.104084 | -0.004808 |
| 50 | 6 | 0 | 4.048685  | -1.220021 | -0.621283 |
| 51 | 7 | 0 | 1.640921  | -0.959737 | -1.050815 |
| 52 | 8 | 0 | 4.284358  | -1.097454 | -1.818439 |
| 53 | 6 | 0 | 6.79045   | 1.407282  | -1.716664 |
| 54 | 1 | 0 | 9.135545  | -3.133779 | 1.107441  |
| 55 | 1 | 0 | 6.858251  | -2.502233 | 1.705734  |
| 56 | 1 | 0 | 6.458874  | -1.505163 | -1.138625 |
| 57 | 1 | 0 | 6.801575  | 0.083164  | 1.48604   |
| 58 | 1 | 0 | 10.147829 | -0.862132 | 0.742663  |
| 59 | 1 | 0 | 8.900003  | -0.859833 | 1.987178  |
| 60 | 1 | 0 | 5.181716  | 1.64086   | 1.389278  |
| 61 | 1 | 0 | 4.91349   | 3.418714  | -1.138453 |
| 62 | 1 | 0 | 3.50108   | 3.321059  | 1.584773  |
| 63 | 1 | 0 | 3.196306  | 5.149485  | -0.916969 |
| 64 | 1 | 0 | 1.807629  | 5.054435  | 1.822399  |
| 65 | 1 | 0 | 1.332608  | 7.399617  | 1.034291  |
| 66 | 1 | 0 | 1.616415  | 6.929758  | -0.634033 |
| 67 | 1 | 0 | -0.385331 | 5.401768  | -0.548126 |
| 68 | 1 | 0 | -0.753187 | 7.110235  | -0.335429 |
| 69 | 1 | 0 | 8.671668  | -1.968715 | -1.687424 |
| 70 | 1 | 0 | 10.190309 | -2.597321 | -1.040673 |

---



---

|     |   |   |            |           |           |
|-----|---|---|------------|-----------|-----------|
| 71  | 1 | 0 | 8.824777   | -3.687261 | -1.284828 |
| 72  | 1 | 0 | -2.061677  | 5.809878  | 1.254789  |
| 73  | 1 | 0 | -0.876566  | 6.769411  | 2.155555  |
| 74  | 1 | 0 | -0.617374  | 5.030238  | 1.908159  |
| 75  | 1 | 0 | -2.912018  | -0.871243 | 1.905812  |
| 76  | 1 | 0 | -2.144101  | -1.996837 | 0.83572   |
| 77  | 1 | 0 | 6.430382   | -4.753379 | 1.915277  |
| 78  | 1 | 0 | 6.411994   | -5.769705 | 0.46071   |
| 79  | 1 | 0 | 7.94712    | -5.080112 | 1.013656  |
| 80  | 1 | 0 | -0.345553  | -0.056529 | -2.817225 |
| 81  | 1 | 0 | -2.16458   | 3.390526  | -0.030665 |
| 82  | 1 | 0 | -3.005307  | 1.270016  | 2.792063  |
| 83  | 1 | 0 | -2.168914  | 2.807629  | 2.560284  |
| 84  | 1 | 0 | -1.233912  | 1.350791  | 2.911961  |
| 85  | 1 | 0 | -2.583981  | -2.622278 | -2.868374 |
| 86  | 1 | 0 | -3.359128  | -3.47799  | -1.520411 |
| 87  | 1 | 0 | -1.847584  | -2.590765 | -1.285971 |
| 88  | 1 | 0 | -4.628215  | -1.114995 | -3.427095 |
| 89  | 1 | 0 | -5.322484  | -2.357884 | -2.399978 |
| 90  | 1 | 0 | -5.705808  | 0.692625  | -2.028119 |
| 91  | 1 | 0 | -5.723596  | -0.603191 | 1.779033  |
| 92  | 1 | 0 | -4.267737  | -3.086789 | 0.959379  |
| 93  | 1 | 0 | -5.52372   | -2.640099 | -0.169371 |
| 94  | 1 | 0 | -7.369585  | -1.82751  | -1.474613 |
| 95  | 1 | 0 | -7.303613  | 0.489736  | 1.048056  |
| 96  | 1 | 0 | -9.038508  | 0.492909  | 1.13733   |
| 97  | 1 | 0 | -9.205421  | -1.916235 | 1.215025  |
| 98  | 1 | 0 | -10.456977 | 0.140577  | -0.921537 |
| 99  | 1 | 0 | -9.714181  | -0.266654 | -2.474882 |
| 100 | 1 | 0 | -9.783905  | -1.472039 | -1.187018 |
| 101 | 1 | 0 | -8.98821   | 2.160237  | -0.802304 |
| 102 | 1 | 0 | -8.160456  | 1.747093  | -2.309189 |
| 103 | 1 | 0 | -7.229641  | 2.032122  | -0.827982 |
| 104 | 1 | 0 | -5.7634    | -1.767941 | 3.706676  |
| 105 | 1 | 0 | -8.435046  | -3.944071 | 1.9667    |
| 106 | 1 | 0 | -6.747002  | -4.294612 | 1.594179  |
| 107 | 1 | 0 | -7.206808  | -3.723914 | 3.214784  |
| 108 | 1 | 0 | 2.666144   | -0.219057 | 0.640309  |
| 109 | 1 | 0 | 2.455609   | -2.006203 | 0.580276  |
| 110 | 1 | 0 | 2.029948   | -0.803774 | -1.9829   |
| 111 | 1 | 0 | 6.710527   | 0.486829  | -2.302836 |
| 112 | 1 | 0 | 6.202505   | 2.161733  | -2.243261 |
| 113 | 1 | 0 | 7.834869   | 1.735302  | -1.734805 |

---

Table S15. Boltzmann population <sup>a</sup> and optical rotation (OR) of low-energy conformers of 11R-2

| Conformers | In MeOH                  |         |
|------------|--------------------------|---------|
|            | Boltzmann population (%) | OR      |
| 11R-2a     | 9.70                     | 737.8   |
| 11R-2b     | 62.47                    | 596.17  |
| 11R-2c     | 16.36                    | 389.8   |
| 11R-2d     | 10.18                    | 1258.46 |
| 11R-2e     | 1.29                     | 870.52  |
| Average    |                          | 697.42  |

<sup>a</sup> From  $\Delta G$  values at 298.15K.

Table S16. Cartesian coordinates for the low-energy reoptimized MMFF conformers of 11R-2 at B3LYP/6-311+G (d, p) level of theory in MeOH

| 11R-2a |      |      | Standard Orientation a(Ångstroms) |         |         |
|--------|------|------|-----------------------------------|---------|---------|
| No.    | Atom | Type | X                                 | Y       | Z       |
| 1      | 6    | 0    | -1.0253                           | 2.763   | -3.1885 |
| 2      | 6    | 0    | -1.4965                           | 4.0728  | -3.1721 |
| 3      | 6    | 0    | -1.4929                           | 4.823   | -1.9931 |
| 4      | 6    | 0    | -1.003                            | 4.2091  | -0.8339 |
| 5      | 6    | 0    | -0.5248                           | 2.8983  | -0.816  |
| 6      | 6    | 0    | -0.5356                           | 2.1659  | -2.0211 |
| 7      | 7    | 0    | -0.8831                           | 4.7022  | 0.4438  |
| 8      | 6    | 0    | -0.3567                           | 3.7483  | 1.2716  |
| 9      | 6    | 0    | -0.1206                           | 2.6081  | 0.5275  |
| 10     | 6    | 0    | 0.4485                            | 1.3207  | 1.0469  |
| 11     | 6    | 0    | -0.6355                           | 0.371   | 1.5838  |
| 12     | 6    | 0    | 0.0467                            | -0.7372 | 2.395   |
| 13     | 7    | 0    | -1.4714                           | -0.1861 | 0.5198  |
| 14     | 7    | 0    | 0.3587                            | -1.873  | 1.6924  |
| 15     | 8    | 0    | 0.4406                            | -0.567  | 3.5472  |
| 16     | 6    | 0    | -0.0584                           | -2.1483 | 0.4089  |
| 17     | 6    | 0    | -1.0288                           | -1.2187 | -0.2652 |
| 18     | 8    | 0    | -1.4435                           | -1.3798 | -1.4064 |
| 19     | 6    | 0    | 0.3324                            | -3.249  | -0.2593 |
| 20     | 6    | 0    | 1.2152                            | -4.2563 | 0.2197  |
| 21     | 7    | 0    | 1.7605                            | -4.2104 | 1.4789  |
| 22     | 6    | 0    | 2.5063                            | -5.2891 | 1.5662  |
| 23     | 7    | 0    | 2.461                             | -6.0254 | 0.4149  |
| 24     | 6    | 0    | 1.6341                            | -5.374  | -0.4605 |
| 25     | 1    | 0    | -1.0375                           | 2.1939  | -4.115  |
| 26     | 1    | 0    | -1.8725                           | 4.5193  | -4.0897 |

|    |   |   |         |         |         |
|----|---|---|---------|---------|---------|
| 27 | 1 | 0 | -1.8593 | 5.8443  | -1.9838 |
| 28 | 1 | 0 | -0.1726 | 1.1425  | -2.0546 |
| 29 | 1 | 0 | -1.1482 | 5.6362  | 0.7238  |
| 30 | 1 | 0 | -0.1921 | 3.9616  | 2.3199  |
| 31 | 1 | 0 | 1.164   | 1.5573  | 1.846   |
| 32 | 1 | 0 | 1.0346  | 0.834   | 0.2568  |
| 33 | 1 | 0 | -1.3216 | 0.8966  | 2.2587  |
| 34 | 1 | 0 | -2.0712 | 0.4634  | 0.0234  |
| 35 | 1 | 0 | 0.9324  | -2.5786 | 2.1575  |
| 36 | 1 | 0 | -0.0569 | -3.4022 | -1.2643 |
| 37 | 1 | 0 | 3.0941  | -5.5881 | 2.4243  |
| 38 | 1 | 0 | 2.9511  | -6.8937 | 0.2476  |
| 39 | 1 | 0 | 1.4279  | -5.7546 | -1.4509 |

| 11R-2b |      |      | Standard Orientation (Ångstroms) |         |         |
|--------|------|------|----------------------------------|---------|---------|
| No.    | Atom | Type | X                                | Y       | Z       |
| 1      | 6    | 0    | -1.0003                          | 5.0294  | 2.0606  |
| 2      | 6    | 0    | -1.5539                          | 5.8741  | 1.1017  |
| 3      | 6    | 0    | -1.6139                          | 5.4956  | -0.2426 |
| 4      | 6    | 0    | -1.0994                          | 4.2398  | -0.5867 |
| 5      | 6    | 0    | -0.5396                          | 3.3706  | 0.3499  |
| 6      | 6    | 0    | -0.4901                          | 3.7771  | 1.6993  |
| 7      | 7    | 0    | -1.0253                          | 3.6185  | -1.8112 |
| 8      | 6    | 0    | -0.4467                          | 2.385   | -1.6818 |
| 9      | 6    | 0    | -0.1296                          | 2.1916  | -0.3512 |
| 10     | 6    | 0    | 0.5115                           | 0.9727  | 0.2415  |
| 11     | 6    | 0    | -0.5099                          | 0.0264  | 0.8941  |
| 12     | 6    | 0    | 0.2563                           | -1.0881 | 1.6154  |
| 13     | 7    | 0    | -1.4602                          | -0.5247 | -0.0727 |
| 14     | 7    | 0    | 0.49                             | -2.2164 | 0.8703  |
| 15     | 8    | 0    | 0.7742                           | -0.9272 | 2.7188  |
| 16     | 6    | 0    | -0.061                           | -2.4757 | -0.366  |
| 17     | 6    | 0    | -1.0989                          | -1.539  | -0.9205 |
| 18     | 8    | 0    | -1.6338                          | -1.6823 | -2.013  |
| 19     | 6    | 0    | 0.2572                           | -3.5665 | -1.0868 |
| 20     | 6    | 0    | 1.1865                           | -4.5783 | -0.7179 |
| 21     | 7    | 0    | 1.8635                           | -4.5473 | 0.4761  |
| 22     | 6    | 0    | 2.6144                           | -5.626  | 0.4696  |
| 23     | 7    | 0    | 2.4463                           | -6.3479 | -0.6794 |
| 24     | 6    | 0    | 1.5304                           | -5.6868 | -1.4531 |
| 25     | 1    | 0    | -0.9615                          | 5.3441  | 3.1006  |
| 26     | 1    | 0    | -1.9444                          | 6.8438  | 1.402   |
| 27     | 1    | 0    | -2.0443                          | 6.1569  | -0.9873 |
| 28     | 1    | 0    | -0.0586                          | 3.1297  | 2.4574  |
| 29     | 1    | 0    | -1.3545                          | 4.0201  | -2.6782 |

|    |   |   |         |         |         |
|----|---|---|---------|---------|---------|
| 30 | 1 | 0 | -0.3114 | 1.7477  | -2.5465 |
| 31 | 1 | 0 | 1.2543  | 1.2897  | 0.9852  |
| 32 | 1 | 0 | 1.077   | 0.4473  | -0.5395 |
| 33 | 1 | 0 | -1.1151 | 0.5521  | 1.6417  |
| 34 | 1 | 0 | -2.1097 | 0.1303  | -0.4915 |
| 35 | 1 | 0 | 1.1115  | -2.9263 | 1.2617  |
| 36 | 1 | 0 | -0.2367 | -3.7067 | -2.0467 |
| 37 | 1 | 0 | 3.2907  | -5.9348 | 1.2561  |
| 38 | 1 | 0 | 2.9157  | -7.2134 | -0.909  |
| 39 | 1 | 0 | 1.2194  | -6.0553 | -2.4204 |

| 11R-2c |      |      | Standard Orientation (Ångstroms) |         |         |
|--------|------|------|----------------------------------|---------|---------|
| No.    | Atom | Type | X                                | Y       | Z       |
| 1      | 6    | 0    | 3.0781                           | 0.7617  | 0.6792  |
| 2      | 6    | 0    | 3.5224                           | 0.518   | -0.6174 |
| 3      | 6    | 0    | 2.7485                           | 0.8819  | -1.7226 |
| 4      | 6    | 0    | 1.5144                           | 1.496   | -1.4774 |
| 5      | 6    | 0    | 1.039                            | 1.7529  | -0.1909 |
| 6      | 6    | 0    | 1.8426                           | 1.3789  | 0.9061  |
| 7      | 7    | 0    | 0.5622                           | 1.9488  | -2.3589 |
| 8      | 6    | 0    | -0.4958                          | 2.4862  | -1.6781 |
| 9      | 6    | 0    | -0.2497                          | 2.3661  | -0.3234 |
| 10     | 6    | 0    | -1.1631                          | 2.8033  | 0.7834  |
| 11     | 6    | 0    | -2.1494                          | 1.7374  | 1.2945  |
| 12     | 6    | 0    | -1.4173                          | 0.6416  | 2.0797  |
| 13     | 7    | 0    | -3.0273                          | 1.1949  | 0.2605  |
| 14     | 7    | 0    | -1.1946                          | -0.5265 | 1.4     |
| 15     | 8    | 0    | -0.9406                          | 0.8412  | 3.1963  |
| 16     | 6    | 0    | -1.6673                          | -0.8098 | 0.1375  |
| 17     | 6    | 0    | -2.6495                          | 0.1261  | -0.5115 |
| 18     | 8    | 0    | -3.147                           | -0.062  | -1.6162 |
| 19     | 6    | 0    | -1.31                            | -1.919  | -0.5348 |
| 20     | 6    | 0    | -0.4174                          | -2.929  | -0.0803 |
| 21     | 7    | 0    | 0.1164                           | -2.9186 | 1.1851  |
| 22     | 6    | 0    | 0.882                            | -3.985  | 1.2404  |
| 23     | 7    | 0    | 0.8558                           | -4.6831 | 0.0653  |
| 24     | 6    | 0    | 0.0212                           | -4.0189 | -0.7927 |
| 25     | 1    | 0    | 3.6914                           | 0.4679  | 1.5272  |
| 26     | 1    | 0    | 4.4848                           | 0.0365  | -0.7729 |
| 27     | 1    | 0    | 3.0967                           | 0.6905  | -2.732  |
| 28     | 1    | 0    | 1.5088                           | 1.5559  | 1.925   |
| 29     | 1    | 0    | 0.6371                           | 1.8877  | -3.3646 |
| 30     | 1    | 0    | -1.3439                          | 2.8891  | -2.2161 |
| 31     | 1    | 0    | -1.741                           | 3.6665  | 0.4259  |
| 32     | 1    | 0    | -0.5558                          | 3.1729  | 1.6197  |

| 33            | 1    | 0                                | -2.8289 | 2.2175  | 2.0102  |
|---------------|------|----------------------------------|---------|---------|---------|
| 34            | 1    | 0                                | -3.6476 | 1.8319  | -0.2207 |
| 35            | 1    | 0                                | -0.5886 | -1.2233 | 1.8351  |
| 36            | 1    | 0                                | -1.7299 | -2.0715 | -1.5269 |
| 37            | 1    | 0                                | 1.4712  | -4.3008 | 2.0913  |
| 38            | 1    | 0                                | 1.3637  | -5.5353 | -0.1283 |
| 39            | 1    | 0                                | -0.1721 | -4.3688 | -1.7967 |
| <hr/>         |      |                                  |         |         |         |
| <b>11R-2d</b> |      | Standard Orientation (Ångstroms) |         |         |         |
| No.           | Atom | Type                             | X       | Y       | Z       |
| 1             | 6    | 0                                | -0.7903 | 2.1852  | -3.2642 |
| 2             | 6    | 0                                | 0.3737  | 1.6488  | -3.8076 |
| 3             | 6    | 0                                | 1.4532  | 1.3002  | -2.9917 |
| 4             | 6    | 0                                | 1.3197  | 1.5091  | -1.6137 |
| 5             | 6    | 0                                | 0.1675  | 2.0451  | -1.037  |
| 6             | 6    | 0                                | -0.9056 | 2.3896  | -1.8843 |
| 7             | 7    | 0                                | 2.2044  | 1.2572  | -0.5926 |
| 8             | 6    | 0                                | 1.6583  | 1.6225  | 0.6064  |
| 9             | 6    | 0                                | 0.3812  | 2.0995  | 0.3786  |
| 10            | 6    | 0                                | -0.5742 | 2.5825  | 1.4289  |
| 11            | 6    | 0                                | -1.4694 | 1.504   | 2.064   |
| 12            | 6    | 0                                | -0.6276 | 0.4194  | 2.7519  |
| 13            | 7    | 0                                | -2.4582 | 0.943   | 1.1485  |
| 14            | 7    | 0                                | -0.4591 | -0.7397 | 2.0384  |
| 15            | 8    | 0                                | -0.0261 | 0.6216  | 3.8058  |
| 16            | 6    | 0                                | -1.0842 | -1.0317 | 0.8455  |
| 17            | 6    | 0                                | -2.183  | -0.1341 | 0.3482  |
| 18            | 8    | 0                                | -2.8581 | -0.3649 | -0.6486 |
| 19            | 6    | 0                                | -0.7817 | -2.1214 | 0.1169  |
| 20            | 6    | 0                                | 0.2007  | -3.1011 | 0.43    |
| 21            | 7    | 0                                | 0.9603  | -3.0395 | 1.5728  |
| 22            | 6    | 0                                | 1.7344  | -4.1004 | 1.5245  |
| 23            | 7    | 0                                | 1.504   | -4.8393 | 0.3974  |
| 24            | 6    | 0                                | 0.5212  | -4.2089 | -0.3169 |
| 25            | 1    | 0                                | -1.6226 | 2.4423  | -3.9146 |
| 26            | 1    | 0                                | 0.4431  | 1.4953  | -4.8819 |
| 27            | 1    | 0                                | 2.3584  | 0.8803  | -3.4171 |
| 28            | 1    | 0                                | -1.824  | 2.7992  | -1.4761 |
| 29            | 1    | 0                                | 3.1241  | 0.8576  | -0.7156 |
| 30            | 1    | 0                                | 2.2159  | 1.4941  | 1.5258  |
| 31            | 1    | 0                                | -1.2091 | 3.3675  | 0.9982  |
| 32            | 1    | 0                                | 0.0099  | 3.0681  | 2.2225  |
| 33            | 1    | 0                                | -2.0669 | 1.9771  | 2.8533  |
| 34            | 1    | 0                                | -3.1716 | 1.5518  | 0.7711  |
| 35            | 1    | 0                                | 0.2161  | -1.42   | 2.3879  |

| 36     | 1    | 0                                | -1.3306 | -2.2821 | -0.8092 |
|--------|------|----------------------------------|---------|---------|---------|
| 37     | 1    | 0                                | 2.4701  | -4.3848 | 2.2653  |
| 38     | 1    | 0                                | 1.9749  | -5.6975 | 0.145   |
| 39     | 1    | 0                                | 0.1511  | -4.5955 | -1.2559 |
| <hr/>  |      |                                  |         |         |         |
| 11R-2e |      | Standard Orientation (Ångstroms) |         |         |         |
| No.    | Atom | Type                             | X       | Y       | Z       |
| 1      | 6    | 0                                | -1.819  | 4.4537  | -1.7868 |
| 2      | 6    | 0                                | -0.6257 | 5.1122  | -2.0715 |
| 3      | 6    | 0                                | 0.5361  | 4.8417  | -1.3434 |
| 4      | 6    | 0                                | 0.4558  | 3.8864  | -0.323  |
| 5      | 6    | 0                                | -0.7227 | 3.2056  | -0.0143 |
| 6      | 6    | 0                                | -1.8815 | 3.5012  | -0.7628 |
| 7      | 7    | 0                                | 1.4242  | 3.4312  | 0.54    |
| 8      | 6    | 0                                | 0.9015  | 2.4911  | 1.3843  |
| 9      | 6    | 0                                | -0.4304 | 2.3097  | 1.0661  |
| 10     | 6    | 0                                | -1.3791 | 1.3598  | 1.7374  |
| 11     | 6    | 0                                | -1.2949 | -0.0864 | 1.2263  |
| 12     | 6    | 0                                | -0.0224 | -0.8016 | 1.7161  |
| 13     | 7    | 0                                | -1.4685 | -0.1903 | -0.2197 |
| 14     | 7    | 0                                | 0.3406  | -1.898  | 0.9722  |
| 15     | 8    | 0                                | 0.5329  | -0.5538 | 2.7848  |
| 16     | 6    | 0                                | -0.2286 | -2.2702 | -0.2258 |
| 17     | 6    | 0                                | -1.2469 | -1.3729 | -0.8728 |
| 18     | 8    | 0                                | -1.811  | -1.6319 | -1.9291 |
| 19     | 6    | 0                                | 0.1243  | -3.3945 | -0.8757 |
| 20     | 6    | 0                                | 1.0853  | -4.3514 | -0.4463 |
| 21     | 7    | 0                                | 1.7933  | -4.2034 | 0.7207  |
| 22     | 6    | 0                                | 2.5727  | -5.2598 | 0.7824  |
| 23     | 7    | 0                                | 2.3942  | -6.0791 | -0.2976 |
| 24     | 6    | 0                                | 1.4409  | -5.508  | -1.0971 |
| 25     | 1    | 0                                | -2.7117 | 4.6804  | -2.3643 |
| 26     | 1    | 0                                | -0.596  | 5.8485  | -2.8713 |
| 27     | 1    | 0                                | 1.4644  | 5.3571  | -1.5665 |
| 28     | 1    | 0                                | -2.8205 | 3.0003  | -0.5506 |
| 29     | 1    | 0                                | 2.3828  | 3.7503  | 0.5468  |
| 30     | 1    | 0                                | 1.5219  | 2.0212  | 2.1377  |
| 31     | 1    | 0                                | -2.4035 | 1.7249  | 1.5877  |
| 32     | 1    | 0                                | -1.2063 | 1.3899  | 2.8208  |
| 33     | 1    | 0                                | -2.1285 | -0.6495 | 1.6688  |
| 34     | 1    | 0                                | -2.1864 | 0.3719  | -0.6571 |
| 35     | 1    | 0                                | 1.0959  | -2.4842 | 1.3306  |
| 36     | 1    | 0                                | -0.36   | -3.6078 | -1.827  |
| 37     | 1    | 0                                | 3.2779  | -5.4845 | 1.5719  |
| 38     | 1    | 0                                | 2.8823  | -6.9477 | -0.4692 |

|    |   |   |        |         |         |
|----|---|---|--------|---------|---------|
| 39 | 1 | 0 | 1.1167 | −5.9621 | −2.0228 |
|----|---|---|--------|---------|---------|

Table S17. Boltzmann population <sup>a</sup> and optical rotation (OR) of low-energy conformers of 11S-2

| Conformers | In MeOH                  |          |
|------------|--------------------------|----------|
|            | Boltzmann population (%) | OR       |
| 11S-2a     | 9.78                     | −737.78  |
| 11S-2b     | 62.33                    | −595.63  |
| 11S-2c     | 16.36                    | −86.51   |
| 11S-2d     | 10.24                    | −1258.35 |
| 11S-2e     | 1.30                     | −870.53  |
| Average    |                          | −697.60  |

<sup>a</sup> From  $\Delta G$  values at 298.15K.

Table S18. Cartesian coordinates for the low-energy reoptimized MMFF conformers of 11S-2 at B3LYP/6-311+G (d, p) level of theory in MeOH

| 11S-2a |      |      | Standard Orientation a(Ångstroms) |         |         |
|--------|------|------|-----------------------------------|---------|---------|
| No.    | Atom | Type | X                                 | Y       | Z       |
| 1      | 6    | 0    | 1.4524                            | 0.2577  | 4.0836  |
| 2      | 6    | 0    | 1.596                             | 1.3326  | 4.9565  |
| 3      | 6    | 0    | 1.4796                            | 2.6486  | 4.501   |
| 4      | 6    | 0    | 1.211                             | 2.8439  | 3.1407  |
| 5      | 6    | 0    | 1.0604                            | 1.7888  | 2.2399  |
| 6      | 6    | 0    | 1.1876                            | 0.4711  | 2.7259  |
| 7      | 7    | 0    | 1.0492                            | 4.0098  | 2.4306  |
| 8      | 6    | 0    | 0.7911                            | 3.7313  | 1.1161  |
| 9      | 6    | 0    | 0.7871                            | 2.359   | 0.9542  |
| 10     | 6    | 0    | 0.5391                            | 1.6252  | −0.3307 |
| 11     | 6    | 0    | −0.954                            | 1.3465  | −0.5716 |
| 12     | 6    | 0    | −1.14                             | 0.9209  | −2.0332 |
| 13     | 7    | 0    | −1.4937                           | 0.3437  | 0.3472  |
| 14     | 7    | 0    | −1.0939                           | −0.4304 | −2.2625 |
| 15     | 8    | 0    | −1.1614                           | 1.7287  | −2.9599 |
| 16     | 6    | 0    | −1.0876                           | −1.3988 | −1.2831 |
| 17     | 6    | 0    | −1.2659                           | −0.9939 | 0.1538  |
| 18     | 8    | 0    | −1.2622                           | −1.7854 | 1.0885  |
| 19     | 6    | 0    | −0.9738                           | −2.7103 | −1.5619 |
| 20     | 6    | 0    | −0.8296                           | −3.2875 | −2.854  |
| 21     | 7    | 0    | −0.8151                           | −2.5258 | −3.9962 |
| 22     | 6    | 0    | −0.6719                           | −3.3877 | −4.9781 |
| 23     | 7    | 0    | −0.5946                           | −4.671  | −4.5125 |
| 24     | 6    | 0    | −0.695                            | −4.6227 | −3.1479 |

|    |   |   |         |         |         |
|----|---|---|---------|---------|---------|
| 25 | 1 | 0 | 1.5445  | −0.7596 | 4.4565  |
| 26 | 1 | 0 | 1.8021  | 1.1461  | 6.0079  |
| 27 | 1 | 0 | 1.5937  | 3.4843  | 5.1834  |
| 28 | 1 | 0 | 1.0788  | −0.3811 | 2.061   |
| 29 | 1 | 0 | 1.1127  | 4.9362  | 2.8294  |
| 30 | 1 | 0 | 0.6343  | 4.5328  | 0.4056  |
| 31 | 1 | 0 | 1.1145  | 0.6906  | −0.3359 |
| 32 | 1 | 0 | 0.9422  | 2.2281  | −1.1556 |
| 33 | 1 | 0 | −1.5547 | 2.2503  | −0.4141 |
| 34 | 1 | 0 | −1.5438 | 0.6021  | 1.3263  |
| 35 | 1 | 0 | −1.0774 | −0.7489 | −3.2329 |
| 36 | 1 | 0 | −0.9953 | −3.4134 | −0.7311 |
| 37 | 1 | 0 | −0.6185 | −3.1478 | −6.0321 |
| 38 | 1 | 0 | −0.4844 | −5.501  | −5.0792 |
| 39 | 1 | 0 | −0.6633 | −5.5128 | −2.5355 |

| 11S-2b |      |      | Standard Orientation (Ångstroms) |         |         |
|--------|------|------|----------------------------------|---------|---------|
| No.    | Atom | Type | X                                | Y       | Z       |
| 1      | 6    | 0    | 0.5017                           | 5.2954  | 1.4994  |
| 2      | 6    | 0    | 0.7844                           | 5.4178  | 2.8576  |
| 3      | 6    | 0    | 1.104                            | 4.2975  | 3.6301  |
| 4      | 6    | 0    | 1.1277                           | 3.0529  | 2.9895  |
| 5      | 6    | 0    | 0.8484                           | 2.897   | 1.6316  |
| 6      | 6    | 0    | 0.5302                           | 4.0433  | 0.8745  |
| 7      | 7    | 0    | 1.4069                           | 1.8036  | 3.4918  |
| 8      | 6    | 0    | 1.3062                           | 0.8627  | 2.5032  |
| 9      | 6    | 0    | 0.9598                           | 1.5022  | 1.3287  |
| 10     | 6    | 0    | 0.7341                           | 0.8527  | −0.0037 |
| 11     | 6    | 0    | −0.7566                          | 0.6276  | −0.306  |
| 12     | 6    | 0    | −0.8866                          | 0.1258  | −1.7485 |
| 13     | 7    | 0    | −1.3853                          | −0.2995 | 0.6356  |
| 14     | 7    | 0    | −0.8804                          | −1.2382 | −1.8978 |
| 15     | 8    | 0    | −0.8298                          | 0.8794  | −2.7183 |
| 16     | 6    | 0    | −0.9536                          | −2.1471 | −0.8645 |
| 17     | 6    | 0    | −1.1863                          | −1.6518 | 0.5365  |
| 18     | 8    | 0    | −1.2538                          | −2.3831 | 1.5166  |
| 19     | 6    | 0    | −0.872                           | −3.4757 | −1.061  |
| 20     | 6    | 0    | −0.6868                          | −4.133  | −2.3089 |
| 21     | 7    | 0    | −0.5908                          | −3.4412 | −3.4909 |
| 22     | 6    | 0    | −0.4318                          | −4.3639 | −4.4133 |
| 23     | 7    | 0    | −0.4226                          | −5.6193 | −3.8713 |
| 24     | 6    | 0    | −0.5861                          | −5.487  | −2.5184 |
| 25     | 1    | 0    | 0.2574                           | 6.1799  | 0.9162  |
| 26     | 1    | 0    | 0.758                            | 6.3996  | 3.3248  |
| 27     | 1    | 0    | 1.3254                           | 4.3968  | 4.6876  |



|        |      |                                  |         |         |         |
|--------|------|----------------------------------|---------|---------|---------|
| 28     | 1    | 0                                | 0.3102  | 3.9632  | −0.1863 |
| 29     | 1    | 0                                | 1.6491  | 1.6143  | 4.4546  |
| 30     | 1    | 0                                | 1.487   | −0.1829 | 2.7187  |
| 31     | 1    | 0                                | 1.2806  | −0.0992 | −0.0376 |
| 32     | 1    | 0                                | 1.1821  | 1.4815  | −0.7843 |
| 33     | 1    | 0                                | −1.3222 | 1.5633  | −0.2268 |
| 34     | 1    | 0                                | −1.4735 | 0.0195  | 1.593   |
| 35     | 1    | 0                                | −0.8275 | −1.614  | −2.8461 |
| 36     | 1    | 0                                | −0.957  | −4.1269 | −0.1928 |
| 37     | 1    | 0                                | −0.3198 | −4.1888 | −5.4753 |
| 38     | 1    | 0                                | −0.3155 | −6.4845 | −4.3831 |
| 39     | 1    | 0                                | −0.6155 | −6.3397 | −1.855  |
| <hr/>  |      |                                  |         |         |         |
| 11S-2c |      | Standard Orientation (Ångstroms) |         |         |         |
| No.    | Atom | Type                             | X       | Y       | Z       |
| 1      | 6    | 0                                | 2.7317  | 0.5108  | −1.6714 |
| 2      | 6    | 0                                | 3.4036  | −0.5549 | −1.0791 |
| 3      | 6    | 0                                | 3.2428  | −0.8401 | 0.2794  |
| 4      | 6    | 0                                | 2.3827  | −0.0186 | 1.0182  |
| 5      | 6    | 0                                | 1.6932  | 1.0559  | 0.4551  |
| 6      | 6    | 0                                | 1.8774  | 1.3235  | −0.9173 |
| 7      | 7    | 0                                | 2.0397  | −0.0677 | 2.348   |
| 8      | 6    | 0                                | 1.1622  | 0.9381  | 2.6481  |
| 9      | 6    | 0                                | 0.9026  | 1.6503  | 1.4925  |
| 10     | 6    | 0                                | −0.0263 | 2.8214  | 1.3653  |
| 11     | 6    | 0                                | −1.4785 | 2.4824  | 0.9828  |
| 12     | 6    | 0                                | −1.5687 | 2.0147  | −0.4754 |
| 13     | 7    | 0                                | −2.1384 | 1.5644  | 1.9079  |
| 14     | 7    | 0                                | −1.6714 | 0.6611  | −0.6585 |
| 15     | 8    | 0                                | −1.422  | 2.7862  | −1.4226 |
| 16     | 6    | 0                                | −1.8056 | −0.266  | 0.3514  |
| 17     | 6    | 0                                | −2.0384 | 0.2044  | 1.7608  |
| 18     | 8    | 0                                | −2.2015 | −0.5476 | 2.7154  |
| 19     | 6    | 0                                | −1.771  | −1.5915 | 0.1235  |
| 20     | 6    | 0                                | −1.5863 | −2.2253 | −1.1365 |
| 21     | 7    | 0                                | −1.518  | −1.5151 | −2.31   |
| 22     | 6    | 0                                | −1.3424 | −2.4203 | −3.246  |
| 23     | 7    | 0                                | −1.3023 | −3.6826 | −2.7223 |
| 24     | 6    | 0                                | −1.462  | −3.5741 | −1.3671 |
| 25     | 1    | 0                                | 2.8654  | 0.7153  | −2.7306 |
| 26     | 1    | 0                                | 4.0622  | −1.1753 | −1.6821 |
| 27     | 1    | 0                                | 3.7671  | −1.6714 | 0.7385  |
| 28     | 1    | 0                                | 1.3561  | 2.1474  | −1.3974 |
| 29     | 1    | 0                                | 2.3867  | −0.7529 | 3.0045  |
| 30     | 1    | 0                                | 0.7805  | 1.048   | 3.6547  |

| 31            | 1    | 0    | 0.3904                           | 3.5275  | 0.6356  |
|---------------|------|------|----------------------------------|---------|---------|
| 32            | 1    | 0    | -0.0367                          | 3.3526  | 2.3268  |
| 33            | 1    | 0    | -2.0699                          | 3.4051  | 1.0399  |
| 34            | 1    | 0    | -2.2438                          | 1.8521  | 2.8713  |
| 35            | 1    | 0    | -1.5896                          | 0.3011  | -1.6102 |
| 36            | 1    | 0    | -1.8876                          | -2.2585 | 0.9752  |
| 37            | 1    | 0    | -1.2395                          | -2.227  | -4.3057 |
| 38            | 1    | 0    | -1.177                           | -4.5373 | -3.2471 |
| 39            | 1    | 0    | -1.4672                          | -4.4362 | -0.7155 |
| <b>11S-2d</b> |      |      | Standard Orientation (Ångstroms) |         |         |
| No.           | Atom | Type | X                                | Y       | Z       |
| 1             | 6    | 0    | 1.1614                           | -0.4017 | 3.8137  |
| 2             | 6    | 0    | 2.0629                           | -1.3582 | 3.355   |
| 3             | 6    | 0    | 2.6149                           | -1.2694 | 2.0744  |
| 4             | 6    | 0    | 2.2282                           | -0.1877 | 1.2741  |
| 5             | 6    | 0    | 1.3278                           | 0.7883  | 1.7033  |
| 6             | 6    | 0    | 0.7877                           | 0.6748  | 3.0009  |
| 7             | 7    | 0    | 2.6021                           | 0.1412  | -0.0068 |
| 8             | 6    | 0    | 1.9794                           | 1.2933  | -0.3996 |
| 9             | 6    | 0    | 1.1594                           | 1.7199  | 0.628   |
| 10            | 6    | 0    | 0.2782                           | 2.9332  | 0.5999  |
| 11            | 6    | 0    | -1.1356                          | 2.7185  | 0.0319  |
| 12            | 6    | 0    | -1.0803                          | 2.2259  | -1.4216 |
| 13            | 7    | 0    | -1.9883                          | 1.8815  | 0.8704  |
| 14            | 7    | 0    | -1.2623                          | 0.8779  | -1.5965 |
| 15            | 8    | 0    | -0.7553                          | 2.9596  | -2.3541 |
| 16            | 6    | 0    | -1.6106                          | -0.0086 | -0.6006 |
| 17            | 6    | 0    | -2.0195                          | 0.5177  | 0.7471  |
| 18            | 8    | 0    | -2.4354                          | -0.1863 | 1.6604  |
| 19            | 6    | 0    | -1.6432                          | -1.3395 | -0.7943 |
| 20            | 6    | 0    | -1.3214                          | -2.0262 | -1.9975 |
| 21            | 7    | 0    | -0.9473                          | -1.3654 | -3.1421 |
| 22            | 6    | 0    | -0.7441                          | -2.3121 | -4.0307 |
| 23            | 7    | 0    | -0.9708                          | -3.553  | -3.5032 |
| 24            | 6    | 0    | -1.3418                          | -3.3856 | -2.1964 |
| 25            | 1    | 0    | 0.7363                           | -0.4927 | 4.8101  |
| 26            | 1    | 0    | 2.3389                           | -2.1885 | 4.0006  |
| 27            | 1    | 0    | 3.3155                           | -2.0172 | 1.7182  |
| 28            | 1    | 0    | 0.0759                           | 1.406   | 3.3703  |
| 29            | 1    | 0    | 3.2439                           | -0.3956 | -0.5731 |
| 30            | 1    | 0    | 2.1555                           | 1.704   | -1.386  |
| 31            | 1    | 0    | 0.7834                           | 3.7066  | 0.0055  |
| 32            | 1    | 0    | 0.1984                           | 3.3383  | 1.6169  |
| 33            | 1    | 0    | -1.6458                          | 3.6897  | 0.0088  |

| 34     | 1    | 0    | -2.2277                          | 2.2065  | 1.7972  |
|--------|------|------|----------------------------------|---------|---------|
| 35     | 1    | 0    | -1.08                            | 0.489   | -2.5218 |
| 36     | 1    | 0    | -1.9386                          | -1.9681 | 0.0439  |
| 37     | 1    | 0    | -0.4377                          | -2.1646 | -5.058  |
| 38     | 1    | 0    | -0.8827                          | -4.4313 | -3.9959 |
| 39     | 1    | 0    | -1.5813                          | -4.22   | -1.5524 |
| <hr/>  |      |      |                                  |         |         |
| 11S-2e |      |      | Standard Orientation (Ångstroms) |         |         |
| No.    | Atom | Type | X                                | Y       | Z       |
| 1      | 6    | 0    | 1.198                            | 2.4214  | 4.3633  |
| 2      | 6    | 0    | 2.5823                           | 2.4947  | 4.2338  |
| 3      | 6    | 0    | 3.1842                           | 2.5593  | 2.9742  |
| 4      | 6    | 0    | 2.3465                           | 2.5454  | 1.8524  |
| 5      | 6    | 0    | 0.9563                           | 2.4688  | 1.9466  |
| 6      | 6    | 0    | 0.3752                           | 2.4086  | 3.2307  |
| 7      | 7    | 0    | 2.6593                           | 2.5993  | 0.5147  |
| 8      | 6    | 0    | 1.5193                           | 2.563   | -0.2395 |
| 9      | 6    | 0    | 0.4349                           | 2.4686  | 0.6111  |
| 10     | 6    | 0    | -1.0069                          | 2.3907  | 0.2012  |
| 11     | 6    | 0    | -1.4791                          | 0.982   | -0.1894 |
| 12     | 6    | 0    | -0.9282                          | 0.5444  | -1.5589 |
| 13     | 7    | 0    | -1.2309                          | -0.0109 | 0.8519  |
| 14     | 7    | 0    | -0.9317                          | -0.813  | -1.7704 |
| 15     | 8    | 0    | -0.6785                          | 1.3241  | -2.4763 |
| 16     | 6    | 0    | -1.2134                          | -1.7659 | -0.8164 |
| 17     | 6    | 0    | -1.4198                          | -1.3455 | 0.6124  |
| 18     | 8    | 0    | -1.6859                          | -2.1236 | 1.5206  |
| 19     | 6    | 0    | -1.2674                          | -3.0802 | -1.1007 |
| 20     | 6    | 0    | -1.0704                          | -3.6763 | -2.3772 |
| 21     | 7    | 0    | -0.7733                          | -2.9334 | -3.493  |
| 22     | 6    | 0    | -0.6613                          | -3.81   | -4.4658 |
| 23     | 7    | 0    | -0.8735                          | -5.0849 | -4.0196 |
| 24     | 6    | 0    | -1.1374                          | -5.0152 | -2.6781 |
| 25     | 1    | 0    | 0.7502                           | 2.3737  | 5.3527  |
| 26     | 1    | 0    | 3.2056                           | 2.5026  | 5.125   |
| 27     | 1    | 0    | 4.2631                           | 2.6175  | 2.876   |
| 28     | 1    | 0    | -0.7022                          | 2.3559  | 3.3492  |
| 29     | 1    | 0    | 3.5983                           | 2.6593  | 0.147   |
| 30     | 1    | 0    | 1.5726                           | 2.5988  | -1.3208 |
| 31     | 1    | 0    | -1.1808                          | 3.0917  | -0.6251 |
| 32     | 1    | 0    | -1.6266                          | 2.7494  | 1.0333  |
| 33     | 1    | 0    | -2.5702                          | 1.0154  | -0.3168 |
| 34     | 1    | 0    | -1.4161                          | 0.2463  | 1.8123  |
| 35     | 1    | 0    | -0.7033                          | -1.1465 | -2.708  |
| 36     | 1    | 0    | -1.4779                          | -3.7706 | -0.2859 |

|    |   |   |         |         |         |
|----|---|---|---------|---------|---------|
| 37 | 1 | 0 | -0.4312 | -3.5869 | -5.4994 |
| 38 | 1 | 0 | -0.8392 | -5.9232 | -4.5836 |
| 39 | 1 | 0 | -1.3403 | -5.8947 | -2.0835 |

Table S19. Gibbs free energies <sup>a</sup> and equilibrium populations <sup>b</sup> of low-energy conformers of 11R-2

| Conformers | In MeOH       |        |
|------------|---------------|--------|
|            | G             | P (%)  |
| 11R-2a     | -1081.1733003 | 4.06%  |
| 11R-2b     | -1081.1746994 | 17.88% |
| 11R-2c     | -1081.1740062 | 8.57%  |
| 11R-2d     | -1081.1757619 | 55.14% |
| 11R-2e     | -1081.1744918 | 14.35% |

<sup>a</sup> B3LYP/6-31+g (d, p), in kcal/mol; <sup>b</sup> from G values at 298.15K.

Table S20. Cartesian coordinates for the low-energy reoptimized MMFF conformers of 11R-2 at B3LYP/6-311+G (d, p) level of theory in MeOH

| 11R-2a |      |      | Standard Orientation (Ångstroms) |           |           |
|--------|------|------|----------------------------------|-----------|-----------|
| No.    | Atom | Type | X                                | Y         | Z         |
| 1      | 6    | 0    | 4.641379                         | -1.783357 | 1.441109  |
| 2      | 6    | 0    | 5.699567                         | -1.776745 | 0.536005  |
| 3      | 6    | 0    | 5.761189                         | -0.831963 | -0.492233 |
| 4      | 6    | 0    | 4.721794                         | 0.101975  | -0.578829 |
| 5      | 6    | 0    | 3.647572                         | 0.12161   | 0.31084   |
| 6      | 6    | 0    | 3.611305                         | -0.841157 | 1.340824  |
| 7      | 7    | 0    | 4.526937                         | 1.128953  | -1.471834 |
| 8      | 6    | 0    | 3.363101                         | 1.79048   | -1.186508 |
| 9      | 6    | 0    | 2.782483                         | 1.192862  | -0.084507 |
| 10     | 6    | 0    | 1.490605                         | 1.596     | 0.565106  |
| 11     | 6    | 0    | 0.261202                         | 0.966246  | -0.105801 |
| 12     | 6    | 0    | -1.026332                        | 1.572473  | 0.479715  |
| 13     | 7    | 0    | 0.251792                         | -0.492672 | 0.003854  |
| 14     | 7    | 0    | -2.153186                        | 0.807882  | 0.303744  |
| 15     | 8    | 0    | -1.100874                        | 2.71763   | 0.919763  |
| 16     | 6    | 0    | -2.163654                        | -0.490727 | -0.155166 |
| 17     | 6    | 0    | -0.858628                        | -1.206138 | -0.368597 |
| 18     | 8    | 0    | -0.771746                        | -2.355255 | -0.783525 |
| 19     | 6    | 0    | -3.302683                        | -1.172657 | -0.374864 |
| 20     | 6    | 0    | -4.62624                         | -0.683209 | -0.19515  |
| 21     | 7    | 0    | -4.879558                        | 0.583678  | 0.269457  |
| 22     | 6    | 0    | -6.190004                        | 0.675961  | 0.308942  |
| 23     | 7    | 0    | -6.78761                         | -0.480131 | -0.110332 |
| 24     | 6    | 0    | -5.794606                        | -1.364115 | -0.437319 |
| 25     | 1    | 0    | 4.612935                         | -2.526376 | 2.234308  |

|    |   |   |           |           |           |
|----|---|---|-----------|-----------|-----------|
| 26 | 1 | 0 | 6.491105  | −2.516746 | 0.630506  |
| 27 | 1 | 0 | 6.588269  | −0.828904 | −1.194553 |
| 28 | 1 | 0 | 2.792407  | −0.857725 | 2.054485  |
| 29 | 1 | 0 | 5.157714  | 1.356922  | −2.227783 |
| 30 | 1 | 0 | 3.048699  | 2.632454  | −1.78931  |
| 31 | 1 | 0 | 1.419056  | 2.691125  | 0.532072  |
| 32 | 1 | 0 | 1.513764  | 1.327552  | 1.629261  |
| 33 | 1 | 0 | 0.25574   | 1.199638  | −1.179213 |
| 34 | 1 | 0 | 1.108011  | −0.972709 | −0.252663 |
| 35 | 1 | 0 | −3.054125 | 1.224549  | 0.543821  |
| 36 | 1 | 0 | −3.223367 | −2.201848 | −0.720527 |
| 37 | 1 | 0 | −6.757302 | 1.540749  | 0.627566  |
| 38 | 1 | 0 | −7.783402 | −0.646064 | −0.165179 |
| 39 | 1 | 0 | −6.005467 | −2.360839 | −0.798304 |

| 11R-2b |      |      | Standard Orientation (Ångstroms) |           |           |
|--------|------|------|----------------------------------|-----------|-----------|
| No.    | Atom | Type | X                                | Y         | Z         |
| 1      | 6    | 0    | 4.653588                         | −1.747757 | 1.755678  |
| 2      | 6    | 0    | 5.704153                         | −0.839956 | 1.863012  |
| 3      | 6    | 0    | 5.766531                         | 0.289052  | 1.041367  |
| 4      | 6    | 0    | 4.735806                         | 0.473076  | 0.111904  |
| 5      | 6    | 0    | 3.66817                          | −0.415309 | −0.017821 |
| 6      | 6    | 0    | 3.63113                          | −1.548496 | 0.82086   |
| 7      | 7    | 0    | 4.545765                         | 1.472914  | −0.812546 |
| 8      | 6    | 0    | 3.392542                         | 1.253925  | −1.516462 |
| 9      | 6    | 0    | 2.812471                         | 0.09034   | −1.048924 |
| 10     | 6    | 0    | 1.529634                         | −0.522358 | −1.530931 |
| 11     | 6    | 0    | 0.34816                          | −0.25389  | −0.587288 |
| 12     | 6    | 0    | −0.883948                        | −1.054641 | −1.041964 |
| 13     | 7    | 0    | 0.039743                         | 1.172148  | −0.481719 |
| 14     | 7    | 0    | −2.084244                        | −0.572431 | −0.580973 |
| 15     | 8    | 0    | −0.816294                        | −2.135154 | −1.623775 |
| 16     | 6    | 0    | −2.258402                        | 0.636264  | 0.056714  |
| 17     | 6    | 0    | −1.098475                        | 1.587416  | 0.160133  |
| 18     | 8    | 0    | −1.15763                         | 2.678226  | 0.714072  |
| 19     | 6    | 0    | −3.445971                        | 1.029819  | 0.552065  |
| 20     | 6    | 0    | −4.660581                        | 0.290217  | 0.517504  |
| 21     | 7    | 0    | −4.748321                        | −0.942138 | −0.081461 |
| 22     | 6    | 0    | −6.000131                        | −1.309548 | 0.077854  |
| 23     | 7    | 0    | −6.719196                        | −0.362799 | 0.753244  |
| 24     | 6    | 0    | −5.871398                        | 0.672684  | 1.042056  |
| 25     | 1    | 0    | 4.626494                         | −2.621844 | 2.401743  |
| 26     | 1    | 0    | 6.489975                         | −1.012645 | 2.594902  |
| 27     | 1    | 0    | 6.588474                         | 0.992308  | 1.125285  |

| 28     | 1    | 0    | 2.82102                          | −2.267786 | 0.744222  |
|--------|------|------|----------------------------------|-----------|-----------|
| 29     | 1    | 0    | 5.173875                         | 2.252859  | −0.948953 |
| 30     | 1    | 0    | 3.082939                         | 1.942717  | −2.29192  |
| 31     | 1    | 0    | 1.686265                         | −1.602275 | −1.648689 |
| 32     | 1    | 0    | 1.297158                         | −0.137984 | −2.53323  |
| 33     | 1    | 0    | 0.585105                         | −0.598549 | 0.428192  |
| 34     | 1    | 0    | 0.822119                         | 1.789461  | −0.297139 |
| 35     | 1    | 0    | −2.917085                        | −1.144119 | −0.731532 |
| 36     | 1    | 0    | −3.502757                        | 2.008078  | 1.026196  |
| 37     | 1    | 0    | −6.440053                        | −2.235512 | −0.268735 |
| 38     | 1    | 0    | −7.699798                        | −0.422443 | 0.991936  |
| 39     | 1    | 0    | −6.198239                        | 1.554275  | 1.574987  |
| 11R-2c |      |      | Standard Orientation (Ångstroms) |           |           |
| No.    | Atom | Type | X                                | Y         | Z         |
| 1      | 6    | 0    | −3.722661                        | −2.555393 | −0.381782 |
| 2      | 6    | 0    | −5.076942                        | −2.259365 | −0.253954 |
| 3      | 6    | 0    | −5.523379                        | −0.935468 | −0.224484 |
| 4      | 6    | 0    | −4.561303                        | 0.076933  | −0.324635 |
| 5      | 6    | 0    | −3.196773                        | −0.185617 | −0.452634 |
| 6      | 6    | 0    | −2.774652                        | −1.530797 | −0.484446 |
| 7      | 7    | 0    | −4.713236                        | 1.443339  | −0.324234 |
| 8      | 6    | 0    | −3.494473                        | 2.054865  | −0.436395 |
| 9      | 6    | 0    | −2.521956                        | 1.076564  | −0.517158 |
| 10     | 6    | 0    | −1.04561                         | 1.311775  | −0.644808 |
| 11     | 6    | 0    | −0.351                           | 1.452757  | 0.720108  |
| 12     | 6    | 0    | 1.052763                         | 2.027462  | 0.49461   |
| 13     | 7    | 0    | −0.296732                        | 0.18931   | 1.455986  |
| 14     | 7    | 0    | 2.051524                         | 1.099074  | 0.348236  |
| 15     | 8    | 0    | 1.253336                         | 3.22333   | 0.290998  |
| 16     | 6    | 0    | 1.914428                         | −0.25239  | 0.575657  |
| 17     | 6    | 0    | 0.625012                         | −0.77599  | 1.14475   |
| 18     | 8    | 0    | 0.412467                         | −1.961412 | 1.367951  |
| 19     | 6    | 0    | 2.910206                         | −1.129364 | 0.35211   |
| 20     | 6    | 0    | 4.205212                         | −0.823252 | −0.150492 |
| 21     | 7    | 0    | 4.588077                         | 0.461278  | −0.447729 |
| 22     | 6    | 0    | 5.826694                         | 0.35704   | −0.87483  |
| 23     | 7    | 0    | 6.254296                         | −0.941738 | −0.8629   |
| 24     | 6    | 0    | 5.222403                         | −1.71269  | −0.398887 |
| 25     | 1    | 0    | −3.393641                        | −3.591626 | −0.401015 |
| 26     | 1    | 0    | −5.798154                        | −3.069614 | −0.176063 |
| 27     | 1    | 0    | −6.579759                        | −0.707967 | −0.126334 |
| 28     | 1    | 0    | −1.722464                        | −1.782607 | −0.583453 |
| 29     | 1    | 0    | −5.601108                        | 1.920236  | −0.250726 |

|    |   |   |           |           |           |
|----|---|---|-----------|-----------|-----------|
| 30 | 1 | 0 | -3.421562 | 3.134781  | -0.451799 |
| 31 | 1 | 0 | -0.891563 | 2.224535  | -1.23598  |
| 32 | 1 | 0 | -0.594268 | 0.499154  | -1.228258 |
| 33 | 1 | 0 | -0.89196  | 2.152993  | 1.367751  |
| 34 | 1 | 0 | -1.180761 | -0.191596 | 1.774503  |
| 35 | 1 | 0 | 2.97395   | 1.432414  | 0.062615  |
| 36 | 1 | 0 | 2.72665   | -2.179002 | 0.574364  |
| 37 | 1 | 0 | 6.457553  | 1.173411  | -1.201521 |
| 38 | 1 | 0 | 7.16886   | -1.266761 | -1.145691 |
| 39 | 1 | 0 | 5.306484  | -2.784961 | -0.291902 |

| 11R-2d |      |      | Standard Orientation (Ångstroms) |           |           |
|--------|------|------|----------------------------------|-----------|-----------|
| No.    | Atom | Type | X                                | Y         | Z         |
| 1      | 6    | 0    | -5.436163                        | 1.719814  | 0.164566  |
| 2      | 6    | 0    | -6.328447                        | 0.65232   | 0.104241  |
| 3      | 6    | 0    | -5.887029                        | -0.638508 | -0.200459 |
| 4      | 6    | 0    | -4.519285                        | -0.816779 | -0.4405   |
| 5      | 6    | 0    | -3.600146                        | 0.231434  | -0.386639 |
| 6      | 6    | 0    | -4.071701                        | 1.524157  | -0.078386 |
| 7      | 7    | 0    | -3.817175                        | -1.955525 | -0.758847 |
| 8      | 6    | 0    | -2.486769                        | -1.667143 | -0.89997  |
| 9      | 6    | 0    | -2.309272                        | -0.315581 | -0.676127 |
| 10     | 6    | 0    | -1.008541                        | 0.42888   | -0.71847  |
| 11     | 6    | 0    | -0.412669                        | 0.657067  | 0.680598  |
| 12     | 6    | 0    | 0.811748                         | 1.568603  | 0.541499  |
| 13     | 7    | 0    | -0.066255                        | -0.595692 | 1.352899  |
| 14     | 7    | 0    | 2.010508                         | 0.92036   | 0.381746  |
| 15     | 8    | 0    | 0.717172                         | 2.787434  | 0.410824  |
| 16     | 6    | 0    | 2.200255                         | -0.437342 | 0.523364  |
| 17     | 6    | 0    | 1.063674                         | -1.292442 | 1.012258  |
| 18     | 8    | 0    | 1.136125                         | -2.506443 | 1.157226  |
| 19     | 6    | 0    | 3.383573                         | -1.032279 | 0.285697  |
| 20     | 6    | 0    | 4.576615                         | -0.391021 | -0.148791 |
| 21     | 7    | 0    | 4.642677                         | 0.964502  | -0.356185 |
| 22     | 6    | 0    | 5.879043                         | 1.190054  | -0.741043 |
| 23     | 7    | 0    | 6.608762                         | 0.034639  | -0.788376 |
| 24     | 6    | 0    | 5.784733                         | -0.990981 | -0.409642 |
| 25     | 1    | 0    | -5.800707                        | 2.716525  | 0.401289  |
| 26     | 1    | 0    | -7.385156                        | 0.82476   | 0.29532   |
| 27     | 1    | 0    | -6.585229                        | -1.467557 | -0.248376 |
| 28     | 1    | 0    | -3.387549                        | 2.366605  | -0.030672 |
| 29     | 1    | 0    | -4.230357                        | -2.871118 | -0.869229 |
| 30     | 1    | 0    | -1.777955                        | -2.44797  | -1.145536 |
| 31     | 1    | 0    | -1.16901                         | 1.393715  | -1.217279 |

|    |   |   |           |           |           |
|----|---|---|-----------|-----------|-----------|
| 32 | 1 | 0 | -0.299665 | -0.120234 | -1.352588 |
| 33 | 1 | 0 | -1.129883 | 1.160974  | 1.33885   |
| 34 | 1 | 0 | -0.838709 | -1.196178 | 1.615558  |
| 35 | 1 | 0 | 2.830326  | 1.483795  | 0.149808  |
| 36 | 1 | 0 | 3.454653  | -2.107708 | 0.438515  |
| 37 | 1 | 0 | 6.300066  | 2.153937  | -0.995559 |
| 38 | 1 | 0 | 7.581217  | -0.041058 | -1.054409 |
| 39 | 1 | 0 | 6.12425   | -2.015934 | -0.36192  |

| 11R-2e |      |      | Standard Orientation (Ångstroms) |           |           |
|--------|------|------|----------------------------------|-----------|-----------|
| No.    | Atom | Type | X                                | Y         | Z         |
| 1      | 6    | 0    | -0.228983                        | 3.071676  | 1.456008  |
| 2      | 6    | 0    | -0.024305                        | 3.789316  | 0.280815  |
| 3      | 6    | 0    | -0.595618                        | 3.372481  | -0.924483 |
| 4      | 6    | 0    | -1.376113                        | 2.2103    | -0.905645 |
| 5      | 6    | 0    | -1.599423                        | 1.467171  | 0.253977  |
| 6      | 6    | 0    | -1.014156                        | 1.913055  | 1.457182  |
| 7      | 7    | 0    | -2.04489                         | 1.578465  | -1.926564 |
| 8      | 6    | 0    | -2.686362                        | 0.46595   | -1.455089 |
| 9      | 6    | 0    | -2.418544                        | 0.346838  | -0.104472 |
| 10     | 6    | 0    | -2.903562                        | -0.747134 | 0.800195  |
| 11     | 6    | 0    | -1.969972                        | -1.963772 | 0.935578  |
| 12     | 6    | 0    | -0.71142                         | -1.605289 | 1.735823  |
| 13     | 7    | 0    | -1.660183                        | -2.619726 | -0.332487 |
| 14     | 7    | 0    | 0.417928                         | -1.378458 | 0.994668  |
| 15     | 8    | 0    | -0.740767                        | -1.400603 | 2.948787  |
| 16     | 6    | 0    | 0.518504                         | -1.553906 | -0.367929 |
| 17     | 6    | 0    | -0.611477                        | -2.207762 | -1.114606 |
| 18     | 8    | 0    | -0.595693                        | -2.43376  | -2.319619 |
| 19     | 6    | 0    | 1.611736                         | -1.191992 | -1.063469 |
| 20     | 6    | 0    | 2.784497                         | -0.585448 | -0.534208 |
| 21     | 7    | 0    | 2.962437                         | -0.388736 | 0.813331  |
| 22     | 6    | 0    | 4.137902                         | 0.188377  | 0.920862  |
| 23     | 7    | 0    | 4.724774                         | 0.363566  | -0.30145  |
| 24     | 6    | 0    | 3.868489                         | -0.132968 | -1.247127 |
| 25     | 1    | 0    | 0.226856                         | 3.408235  | 2.383724  |
| 26     | 1    | 0    | 0.589769                         | 4.68637   | 0.300227  |
| 27     | 1    | 0    | -0.434282                        | 3.933176  | -1.839059 |
| 28     | 1    | 0    | -1.15826                         | 1.361902  | 2.382661  |
| 29     | 1    | 0    | -2.054934                        | 1.89366   | -2.886485 |
| 30     | 1    | 0    | -3.261502                        | -0.158652 | -2.126    |
| 31     | 1    | 0    | -3.873942                        | -1.095928 | 0.421275  |
| 32     | 1    | 0    | -3.102377                        | -0.324427 | 1.793433  |
| 33     | 1    | 0    | -2.491921                        | -2.729868 | 1.522832  |
| 34     | 1    | 0    | -2.424849                        | -3.008624 | -0.867485 |



|    |   |   |          |           |           |
|----|---|---|----------|-----------|-----------|
| 35 | 1 | 0 | 1.235407 | −0.999735 | 1.474648  |
| 36 | 1 | 0 | 1.614028 | −1.367039 | −2.137388 |
| 37 | 1 | 0 | 4.611774 | 0.498219  | 1.843044  |
| 38 | 1 | 0 | 5.62818  | 0.784639  | −0.469294 |
| 39 | 1 | 0 | 4.100121 | −0.114181 | −2.302434 |

Table S21. Gibbs free energies <sup>a</sup> and equilibrium populations <sup>b</sup> of low-energy conformers of 11S-2

| Conformers | In MeOH       |        |
|------------|---------------|--------|
|            | G             | P (%)  |
| 11S-2a     | −1081.1732837 | 4.01%  |
| 11S-2b     | −1081.1746967 | 17.93% |
| 11S-2c     | −1081.1740092 | 8.65%  |
| 11S-2d     | −1081.1757548 | 55.05% |
| 11S-2e     | −1081.1744874 | 14.36% |

<sup>a</sup> B3LYP/6-31+g (d, p), in kcal/mol; <sup>b</sup> from G values at 298.15K.

Table S22. Cartesian coordinates for the low-energy reoptimized MMFF conformers of 11S-2 at B3LYP/6-311+G (d, p) level of theory in MeOH

| 11S-2a |      |      | Standard Orientation (Ångstroms) |           |           |
|--------|------|------|----------------------------------|-----------|-----------|
| No.    | Atom | Type | X                                | Y         | Z         |
| 1      | 6    | 0    | −4.64141                         | −1.783354 | 1.441029  |
| 2      | 6    | 0    | −5.699599                        | −1.776654 | 0.536088  |
| 3      | 6    | 0    | −5.761167                        | −0.831994 | −0.492203 |
| 4      | 6    | 0    | −4.721711                        | 0.101962  | −0.578822 |
| 5      | 6    | 0    | −3.647586                        | 0.121589  | 0.310799  |
| 6      | 6    | 0    | −3.611219                        | −0.84117  | 1.340805  |
| 7      | 7    | 0    | −4.527013                        | 1.129031  | −1.471852 |
| 8      | 6    | 0    | −3.363099                        | 1.790491  | −1.186496 |
| 9      | 6    | 0    | −2.782422                        | 1.192837  | −0.084445 |
| 10     | 6    | 0    | −1.490562                        | 1.596021  | 0.565156  |
| 11     | 6    | 0    | −0.261226                        | 0.966177  | −0.105815 |
| 12     | 6    | 0    | 1.026284                         | 1.572486  | 0.479677  |
| 13     | 7    | 0    | −0.251818                        | −0.492735 | 0.00384   |
| 14     | 7    | 0    | 2.153236                         | 0.807826  | 0.303694  |
| 15     | 8    | 0    | 1.100906                         | 2.717588  | 0.919795  |
| 16     | 6    | 0    | 2.163675                         | −0.490751 | −0.155157 |
| 17     | 6    | 0    | 0.858585                         | −1.20617  | −0.368675 |
| 18     | 8    | 0    | 0.771669                         | −2.355221 | −0.783511 |
| 19     | 6    | 0    | 3.302769                         | −1.172634 | −0.37485  |
| 20     | 6    | 0    | 4.626171                         | −0.683164 | −0.195161 |
| 21     | 7    | 0    | 4.879522                         | 0.583745  | 0.269512  |

| 22            | 6    | 0    | 6.190002                         | 0.676021  | 0.308919  |
|---------------|------|------|----------------------------------|-----------|-----------|
| 23            | 7    | 0    | 6.787629                         | −0.480186 | −0.110425 |
| 24            | 6    | 0    | 5.79457                          | −1.364147 | −0.437221 |
| 25            | 1    | 0    | −4.612959                        | −2.526336 | 2.234355  |
| 26            | 1    | 0    | −6.491101                        | −2.516693 | 0.63051   |
| 27            | 1    | 0    | −6.588225                        | −0.828817 | −1.194617 |
| 28            | 1    | 0    | −2.792367                        | −0.857745 | 2.054387  |
| 29            | 1    | 0    | −5.157687                        | 1.356915  | −2.227771 |
| 30            | 1    | 0    | −3.048704                        | 2.632487  | −1.78931  |
| 31            | 1    | 0    | −1.51379                         | 1.327544  | 1.629271  |
| 32            | 1    | 0    | −1.419056                        | 2.691114  | 0.532125  |
| 33            | 1    | 0    | −0.255687                        | 1.199597  | −1.179239 |
| 34            | 1    | 0    | −1.107955                        | −0.972721 | −0.252659 |
| 35            | 1    | 0    | 3.054194                         | 1.224597  | 0.543841  |
| 36            | 1    | 0    | 3.223371                         | −2.201859 | −0.720532 |
| 37            | 1    | 0    | 6.757326                         | 1.540759  | 0.627597  |
| 38            | 1    | 0    | 7.783367                         | −0.645986 | −0.165171 |
| 39            | 1    | 0    | 6.005453                         | −2.360846 | −0.79822  |
| <b>11S-2b</b> |      |      | Standard Orientation (Ångstroms) |           |           |
| No.           | Atom | Type | X                                | Y         | Z         |
| 1             | 6    | 0    | −3.1904                          | 3.909     | 0.4887    |
| 2             | 6    | 0    | −3.4365                          | 4.397     | 1.7696    |
| 3             | 6    | 0    | −2.4831                          | 4.2697    | 2.7838    |
| 4             | 6    | 0    | −1.2774                          | 3.6335    | 2.4649    |
| 5             | 6    | 0    | −1.0018                          | 3.1307    | 1.1933    |
| 6             | 6    | 0    | −1.9793                          | 3.2754    | 0.1871    |
| 7             | 7    | 0    | −0.1767                          | 3.3788    | 3.2487    |
| 8             | 6    | 0    | 0.7815                           | 2.7258    | 2.5215    |
| 9             | 6    | 0    | 0.3053                           | 2.547     | 1.2369    |
| 10            | 6    | 0    | 1.0231                           | 1.8686    | 0.1065    |
| 11            | 6    | 0    | 0.5253                           | 0.4375    | −0.1436   |
| 12            | 6    | 0    | 1.1697                           | −0.1308   | −1.4195   |
| 13            | 7    | 0    | 0.7663                           | −0.4384   | 1.0029    |
| 14            | 7    | 0    | 1.169                            | −1.5016   | −1.5015   |
| 15            | 8    | 0    | 1.5073                           | 0.5613    | −2.3774   |
| 16            | 6    | 0    | 0.8322                           | −2.355    | −0.4738   |
| 17            | 6    | 0    | 0.5657                           | −1.7904   | 0.8941    |
| 18            | 8    | 0    | 0.2536                           | −2.4701   | 1.8641    |
| 19            | 6    | 0    | 0.78                             | −3.6907   | −0.6285   |
| 20            | 6    | 0    | 1.0347                           | −4.4107   | −1.8286   |
| 21            | 7    | 0    | 1.4069                           | −3.7833   | −2.9917   |
| 22            | 6    | 0    | 1.5556                           | −4.7514   | −3.8681   |

| 23     | 7    | 0    | 1.2953                           | −5.9743   | −3.3144   |
|--------|------|------|----------------------------------|-----------|-----------|
| 24     | 6    | 0    | 0.9598                           | −5.7715   | −2.0026   |
| 25     | 1    | 0    | −3.944                           | 4.0223    | −0.2868   |
| 26     | 1    | 0    | −4.3832                          | 4.8874    | 1.9844    |
| 27     | 1    | 0    | −2.6768                          | 4.6543    | 3.7797    |
| 28     | 1    | 0    | −1.7987                          | 2.9049    | −0.8177   |
| 29     | 1    | 0    | −0.0934                          | 3.6421    | 4.2209    |
| 30     | 1    | 0    | 1.7219                           | 2.4455    | 2.9783    |
| 31     | 1    | 0    | 2.1009                           | 1.8538    | 0.317     |
| 32     | 1    | 0    | 0.8985                           | 2.4793    | −0.7969   |
| 33     | 1    | 0    | −0.5592                          | 0.4355    | −0.3161   |
| 34     | 1    | 0    | 0.4743                           | −0.0865   | 1.9075    |
| 35     | 1    | 0    | 1.4517                           | −1.9264   | −2.3862   |
| 36     | 1    | 0    | 0.5225                           | −4.2957   | 0.239     |
| 37     | 1    | 0    | 1.8464                           | −4.6326   | −4.9037   |
| 38     | 1    | 0    | 1.3448                           | −6.8635   | −3.7926   |
| 39     | 1    | 0    | 0.7083                           | −6.5866   | −1.3389   |
| 11S-2c |      |      | Standard Orientation (Ångstroms) |           |           |
| No.    | Atom | Type | X                                | Y         | Z         |
| 1      | 6    | 0    | 3.722696                         | −2.555438 | −0.38186  |
| 2      | 6    | 0    | 5.076931                         | −2.259346 | −0.253948 |
| 3      | 6    | 0    | 5.523341                         | −0.935397 | −0.224444 |
| 4      | 6    | 0    | 4.56132                          | 0.076951  | −0.324634 |
| 5      | 6    | 0    | 3.196731                         | −0.185584 | −0.452692 |
| 6      | 6    | 0    | 2.77461                          | −1.530814 | −0.484464 |
| 7      | 7    | 0    | 4.713283                         | 1.44329   | −0.324179 |
| 8      | 6    | 0    | 3.494477                         | 2.054879  | −0.436446 |
| 9      | 6    | 0    | 2.521963                         | 1.07656   | −0.517148 |
| 10     | 6    | 0    | 1.045664                         | 1.311773  | −0.644746 |
| 11     | 6    | 0    | 0.35101                          | 1.452776  | 0.720082  |
| 12     | 6    | 0    | −1.052787                        | 2.027459  | 0.494651  |
| 13     | 7    | 0    | 0.296798                         | 0.189242  | 1.455997  |
| 14     | 7    | 0    | −2.051526                        | 1.099118  | 0.348215  |
| 15     | 8    | 0    | −1.253318                        | 3.223314  | 0.291015  |
| 16     | 6    | 0    | −1.914413                        | −0.252445 | 0.575699  |
| 17     | 6    | 0    | −0.625054                        | −0.776027 | 1.144705  |
| 18     | 8    | 0    | −0.412407                        | −1.961465 | 1.36794   |
| 19     | 6    | 0    | −2.910267                        | −1.129326 | 0.352101  |
| 20     | 6    | 0    | −4.205302                        | −0.823304 | −0.150548 |
| 21     | 7    | 0    | −4.588087                        | 0.461329  | −0.447741 |
| 22     | 6    | 0    | −5.826723                        | 0.357007  | −0.874834 |
| 23     | 7    | 0    | −6.254303                        | −0.941664 | −0.862869 |

| 24     | 6    | 0    | -5.222389                        | -1.712659 | -0.398844 |
|--------|------|------|----------------------------------|-----------|-----------|
| 25     | 1    | 0    | 3.393587                         | -3.591599 | -0.401064 |
| 26     | 1    | 0    | 5.79817                          | -3.069608 | -0.176022 |
| 27     | 1    | 0    | 6.579685                         | -0.707892 | -0.126329 |
| 28     | 1    | 0    | 1.722476                         | -1.782526 | -0.583398 |
| 29     | 1    | 0    | 5.601178                         | 1.920227  | -0.250694 |
| 30     | 1    | 0    | 3.421536                         | 3.134745  | -0.451808 |
| 31     | 1    | 0    | 0.594192                         | 0.499153  | -1.228278 |
| 32     | 1    | 0    | 0.891587                         | 2.22462   | -1.235948 |
| 33     | 1    | 0    | 0.892001                         | 2.15297   | 1.367719  |
| 34     | 1    | 0    | 1.180801                         | -0.191586 | 1.774502  |
| 35     | 1    | 0    | -2.973893                        | 1.43239   | 0.062657  |
| 36     | 1    | 0    | -2.726604                        | -2.179002 | 0.574389  |
| 37     | 1    | 0    | -6.457554                        | 1.173371  | -1.201512 |
| 38     | 1    | 0    | -7.168827                        | -1.266672 | -1.145678 |
| 39     | 1    | 0    | -5.306542                        | -2.784977 | -0.29192  |
| 11S-2d |      |      | Standard Orientation (Ångstroms) |           |           |
| No.    | Atom | Type | X                                | Y         | Z         |
| 1      | 6    | 0    | 5.436161                         | 1.719876  | 0.164569  |
| 2      | 6    | 0    | 6.328437                         | 0.652316  | 0.104281  |
| 3      | 6    | 0    | 5.886915                         | -0.638476 | -0.20049  |
| 4      | 6    | 0    | 4.519258                         | -0.816711 | -0.440541 |
| 5      | 6    | 0    | 3.600156                         | 0.231387  | -0.386656 |
| 6      | 6    | 0    | 4.0717                           | 1.524144  | -0.078361 |
| 7      | 7    | 0    | 3.817145                         | -1.955481 | -0.758838 |
| 8      | 6    | 0    | 2.486743                         | -1.66715  | -0.900055 |
| 9      | 6    | 0    | 2.309262                         | -0.315577 | -0.676111 |
| 10     | 6    | 0    | 1.008457                         | 0.42889   | -0.718501 |
| 11     | 6    | 0    | 0.412717                         | 0.65703   | 0.68059   |
| 12     | 6    | 0    | -0.811777                        | 1.56858   | 0.541541  |
| 13     | 7    | 0    | 0.066256                         | -0.595773 | 1.352881  |
| 14     | 7    | 0    | -2.010527                        | 0.92032   | 0.381835  |
| 15     | 8    | 0    | -0.717122                        | 2.787445  | 0.410818  |
| 16     | 6    | 0    | -2.200242                        | -0.437336 | 0.523338  |
| 17     | 6    | 0    | -1.063623                        | -1.292457 | 1.01229   |
| 18     | 8    | 0    | -1.136058                        | -2.506531 | 1.157205  |
| 19     | 6    | 0    | -3.383513                        | -1.032242 | 0.285725  |
| 20     | 6    | 0    | -4.576637                        | -0.391094 | -0.148855 |
| 21     | 7    | 0    | -4.64272                         | 0.964574  | -0.356209 |
| 22     | 6    | 0    | -5.878993                        | 1.190056  | -0.741053 |
| 23     | 7    | 0    | -6.60881                         | 0.034687  | -0.78836  |
| 24     | 6    | 0    | -5.784675                        | -0.990925 | -0.409605 |

| 25     | 1    | 0    | 5.800698                         | 2.716513  | 0.401322  |
|--------|------|------|----------------------------------|-----------|-----------|
| 26     | 1    | 0    | 7.385177                         | 0.824716  | 0.295377  |
| 27     | 1    | 0    | 6.585263                         | -1.467541 | -0.248379 |
| 28     | 1    | 0    | 3.387587                         | 2.366576  | -0.030565 |
| 29     | 1    | 0    | 4.230362                         | -2.871111 | -0.869316 |
| 30     | 1    | 0    | 1.778011                         | -2.447927 | -1.145559 |
| 31     | 1    | 0    | 0.299729                         | -0.120178 | -1.35257  |
| 32     | 1    | 0    | 1.16891                          | 1.393725  | -1.217195 |
| 33     | 1    | 0    | 1.129917                         | 1.160999  | 1.338819  |
| 34     | 1    | 0    | 0.838728                         | -1.196194 | 1.615528  |
| 35     | 1    | 0    | -2.830317                        | 1.483745  | 0.149837  |
| 36     | 1    | 0    | -3.454575                        | -2.10773  | 0.438513  |
| 37     | 1    | 0    | -6.300008                        | 2.153966  | -0.995514 |
| 38     | 1    | 0    | -7.581221                        | -0.041048 | -1.054359 |
| 39     | 1    | 0    | -6.124304                        | -2.015973 | -0.361921 |
| <hr/>  |      |      |                                  |           |           |
| 11S-2e |      |      | Standard Orientation (Ångstroms) |           |           |
| No.    | Atom | Type | X                                | Y         | Z         |
| 1      | 6    | 0    | 0.228901                         | 3.071693  | 1.455991  |
| 2      | 6    | 0    | 0.024193                         | 3.789325  | 0.280795  |
| 3      | 6    | 0    | 0.595555                         | 3.37256   | -0.924476 |
| 4      | 6    | 0    | 1.376044                         | 2.210309  | -0.905655 |
| 5      | 6    | 0    | 1.599441                         | 1.467197  | 0.254053  |
| 6      | 6    | 0    | 1.014101                         | 1.913104  | 1.457244  |
| 7      | 7    | 0    | 2.044838                         | 1.578495  | -1.926598 |
| 8      | 6    | 0    | 2.686341                         | 0.465918  | -1.455064 |
| 9      | 6    | 0    | 2.418495                         | 0.346899  | -0.104509 |
| 10     | 6    | 0    | 2.903523                         | -0.747058 | 0.800173  |
| 11     | 6    | 0    | 1.970004                         | -1.963702 | 0.935595  |
| 12     | 6    | 0    | 0.711431                         | -1.605316 | 1.735886  |
| 13     | 7    | 0    | 1.660236                         | -2.619671 | -0.332472 |
| 14     | 7    | 0    | -0.417915                        | -1.378482 | 0.99457   |
| 15     | 8    | 0    | 0.740833                         | -1.400668 | 2.948773  |
| 16     | 6    | 0    | -0.518456                        | -1.553957 | -0.367956 |
| 17     | 6    | 0    | 0.611568                         | -2.207728 | -1.114678 |
| 18     | 8    | 0    | 0.595693                         | -2.433781 | -2.319586 |
| 19     | 6    | 0    | -1.611716                        | -1.192111 | -1.06347  |
| 20     | 6    | 0    | -2.784535                        | -0.585445 | -0.534215 |
| 21     | 7    | 0    | -2.962354                        | -0.388766 | 0.813352  |
| 22     | 6    | 0    | -4.137953                        | 0.18832   | 0.92088   |
| 23     | 7    | 0    | -4.724736                        | 0.363489  | -0.301461 |
| 24     | 6    | 0    | -3.868444                        | -0.132984 | -1.247089 |
| 25     | 1    | 0    | -0.226941                        | 3.408183  | 2.383642  |

|    |   |   |           |           |           |
|----|---|---|-----------|-----------|-----------|
| 26 | 1 | 0 | -0.589791 | 4.686404  | 0.300249  |
| 27 | 1 | 0 | 0.434207  | 3.93317   | -1.839066 |
| 28 | 1 | 0 | 1.158303  | 1.36196   | 2.382645  |
| 29 | 1 | 0 | 2.055001  | 1.89369   | -2.886455 |
| 30 | 1 | 0 | 3.261575  | -0.158621 | -2.126    |
| 31 | 1 | 0 | 3.102422  | -0.324315 | 1.793398  |
| 32 | 1 | 0 | 3.873896  | -1.095836 | 0.42122   |
| 33 | 1 | 0 | 2.492022  | -2.729834 | 1.522887  |
| 34 | 1 | 0 | 2.42484   | -3.008575 | -0.867483 |
| 35 | 1 | 0 | -1.235332 | -0.999722 | 1.474699  |
| 36 | 1 | 0 | -1.613989 | -1.367011 | -2.137363 |
| 37 | 1 | 0 | -4.611691 | 0.498138  | 1.842996  |
| 38 | 1 | 0 | -5.628148 | 0.784541  | -0.469236 |
| 39 | 1 | 0 | -4.100027 | -0.114184 | -2.30242  |

Table S23. Boltzmann population <sup>a</sup> and optical rotation (OR) of low-energy conformers of 11R-3

| Conformers | In MeOH                  |        |
|------------|--------------------------|--------|
|            | Boltzmann population (%) | OR     |
| 11R-3a     | 11.18                    | 164.34 |
| 11R-3b     | 10.43                    | 62.44  |
| 11R-3c     | 44.18                    | 808.04 |
| 11R-3d     | 4.73                     | 358.45 |
| 11R-3e     | 29.49                    | 521.39 |
| Average    |                          | 552.62 |

<sup>a</sup> From  $\Delta G$  values at 298.15K.

Table S24. Cartesian coordinates for the low-energy reoptimized MMFF conformers of 11R-3 at B3LYP/6-311+G (d, p) level of theory in MeOH

| 11R-3a |      |      | Standard Orientation a(Ångstroms) |        |         |
|--------|------|------|-----------------------------------|--------|---------|
| No.    | Atom | Type | X                                 | Y      | Z       |
| 1      | 6    | 0    | 3.1916                            | 3.045  | 2.4749  |
| 2      | 6    | 0    | 2.4892                            | 3.7842 | 3.4232  |
| 3      | 6    | 0    | 1.1547                            | 4.1425 | 3.2123  |
| 4      | 6    | 0    | 0.5529                            | 3.7297 | 2.0175  |
| 5      | 6    | 0    | 1.2276                            | 2.9855 | 1.0496  |
| 6      | 6    | 0    | 2.5745                            | 2.6404 | 1.2855  |
| 7      | 7    | 0    | -0.723                            | 3.9404 | 1.5504  |
| 8      | 6    | 0    | -0.8824                           | 3.3499 | 0.3259  |
| 9      | 6    | 0    | 0.3078                            | 2.7397 | -0.0204 |

|    |   |   |         |         |         |
|----|---|---|---------|---------|---------|
| 10 | 6 | 0 | 0.5803  | 1.9664  | -1.2772 |
| 11 | 6 | 0 | 0.5399  | 0.4468  | -1.0624 |
| 12 | 6 | 0 | 0.9903  | -0.2786 | -2.3331 |
| 13 | 7 | 0 | -0.7823 | -0.0207 | -0.6599 |
| 14 | 7 | 0 | 0.5854  | -1.5875 | -2.4378 |
| 15 | 8 | 0 | 1.7942  | 0.1825  | -3.1403 |
| 16 | 6 | 0 | -0.3331 | -2.2148 | -1.6092 |
| 17 | 6 | 0 | -1.031  | -1.3685 | -0.5638 |
| 18 | 8 | 0 | -1.7945 | -1.777  | 0.2993  |
| 19 | 6 | 0 | -0.5566 | -3.5293 | -1.7984 |
| 20 | 6 | 0 | -1.4526 | -4.4349 | -1.1742 |
| 21 | 7 | 0 | -1.0757 | -5.7478 | -1.042  |
| 22 | 6 | 0 | -2.0988 | -6.3439 | -0.4725 |
| 23 | 7 | 0 | -3.1322 | -5.4746 | -0.267  |
| 24 | 6 | 0 | -2.7454 | -4.2545 | -0.7499 |
| 25 | 1 | 0 | 4.2302  | 2.7802  | 2.6574  |
| 26 | 1 | 0 | 2.9861  | 4.0901  | 4.3411  |
| 27 | 1 | 0 | 0.6116  | 4.7213  | 3.9521  |
| 28 | 1 | 0 | 3.1367  | 2.0691  | 0.5528  |
| 29 | 1 | 0 | -1.4344 | 4.4606  | 2.0452  |
| 30 | 1 | 0 | -1.8282 | 3.4156  | -0.1963 |
| 31 | 1 | 0 | 1.5614  | 2.2705  | -1.6639 |
| 32 | 1 | 0 | -0.1508 | 2.2519  | -2.0456 |
| 33 | 1 | 0 | 1.2377  | 0.1521  | -0.2674 |
| 34 | 1 | 0 | -1.2015 | 0.4745  | 0.1194  |
| 35 | 1 | 0 | 0.9883  | -2.0957 | -3.2156 |
| 36 | 1 | 0 | 0.0597  | -4.0292 | -2.5439 |
| 37 | 1 | 0 | -2.1512 | -7.3874 | -0.1925 |
| 38 | 1 | 0 | -4.0232 | -5.6973 | 0.1544  |
| 39 | 1 | 0 | -3.4034 | -3.3975 | -0.7277 |

| 11R-3b |      |      | Standard Orientation (Ångstroms) |         |         |
|--------|------|------|----------------------------------|---------|---------|
| No.    | Atom | Type | X                                | Y       | Z       |
| 1      | 6    | 0    | -2.2396                          | 3.8335  | 1.0979  |
| 2      | 6    | 0    | -1.9285                          | 4.3668  | 2.3459  |
| 3      | 6    | 0    | -0.6278                          | 4.3002  | 2.853   |
| 4      | 6    | 0    | 0.3459                           | 3.6774  | 2.063   |
| 5      | 6    | 0    | 0.0668                           | 3.1324  | 0.8097  |
| 6      | 6    | 0    | -1.2534                          | 3.2158  | 0.3202  |
| 7      | 7    | 0    | 1.6841                           | 3.4748  | 2.3041  |
| 8      | 6    | 0    | 2.2594                           | 2.8109  | 1.2543  |
| 9      | 6    | 0    | 1.2857                           | 2.5759  | 0.3027  |
| 10     | 6    | 0    | 1.4785                           | 1.8709  | -1.008  |
| 11     | 6    | 0    | 1.3634                           | 0.345   | -0.8877 |
| 12     | 6    | 0    | 1.7468                           | -0.3192 | -2.2138 |

|    |   |   |         |         |         |
|----|---|---|---------|---------|---------|
| 13 | 7 | 0 | 0.0294  | -0.0877 | -0.4909 |
| 14 | 7 | 0 | 1.2986  | -1.6088 | -2.3731 |
| 15 | 8 | 0 | 2.5402  | 0.1599  | -3.0208 |
| 16 | 6 | 0 | 0.3984  | -2.2547 | -1.5385 |
| 17 | 6 | 0 | -0.3077 | -1.4188 | -0.4888 |
| 18 | 8 | 0 | -1.1712 | -1.8151 | 0.2807  |
| 19 | 6 | 0 | 0.1598  | -3.5614 | -1.7615 |
| 20 | 6 | 0 | -0.6749 | -4.4985 | -1.0998 |
| 21 | 7 | 0 | -1.2365 | -5.5121 | -1.8353 |
| 22 | 6 | 0 | -1.9167 | -6.2295 | -0.9699 |
| 23 | 7 | 0 | -1.7841 | -5.7399 | 0.2983  |
| 24 | 6 | 0 | -0.9553 | -4.6532 | 0.2349  |
| 25 | 1 | 0 | -3.2577 | 3.8967  | 0.7213  |
| 26 | 1 | 0 | -2.7086 | 4.8436  | 2.9352  |
| 27 | 1 | 0 | -0.3888 | 4.7189  | 3.8251  |
| 28 | 1 | 0 | -1.5109 | 2.8057  | -0.6522 |
| 29 | 1 | 0 | 2.1668  | 3.777   | 3.139   |
| 30 | 1 | 0 | 3.3135  | 2.5665  | 1.2718  |
| 31 | 1 | 0 | 2.4668  | 2.1439  | -1.401  |
| 32 | 1 | 0 | 0.7498  | 2.2453  | -1.7386 |
| 33 | 1 | 0 | 2.0616  | -0.032  | -0.1285 |
| 34 | 1 | 0 | -0.3959 | 0.3993  | 0.2912  |
| 35 | 1 | 0 | 1.6671  | -2.0906 | -3.1841 |
| 36 | 1 | 0 | 0.6711  | -4.015  | -2.6091 |
| 37 | 1 | 0 | -2.5127 | -7.1031 | -1.1976 |
| 38 | 1 | 0 | -2.212  | -6.1195 | 1.1313  |
| 39 | 1 | 0 | -0.6715 | -4.1011 | 1.1193  |

| 11R-3c |      |      | Standard Orientation (Ångstroms) |         |         |
|--------|------|------|----------------------------------|---------|---------|
| No.    | Atom | Type | X                                | Y       | Z       |
| 1      | 6    | 0    | 3.3267                           | 2.8519  | 2.3451  |
| 2      | 6    | 0    | 2.7108                           | 3.5362  | 3.3899  |
| 3      | 6    | 0    | 1.3725                           | 3.9298  | 3.3024  |
| 4      | 6    | 0    | 0.6769                           | 3.6093  | 2.1304  |
| 5      | 6    | 0    | 1.2636                           | 2.9216  | 1.0679  |
| 6      | 6    | 0    | 2.6164                           | 2.5392  | 1.1802  |
| 7      | 7    | 0    | -0.6244                          | 3.8733  | 1.7734  |
| 8      | 6    | 0    | -0.8848                          | 3.3699  | 0.5274  |
| 9      | 6    | 0    | 0.2636                           | 2.7644  | 0.0547  |
| 10     | 6    | 0    | 0.4266                           | 2.0733  | -1.2673 |
| 11     | 6    | 0    | 0.3701                           | 0.5439  | -1.1499 |
| 12     | 6    | 0    | 0.7019                           | -0.1041 | -2.4971 |
| 13     | 7    | 0    | -0.9271                          | 0.0708  | -0.6843 |
| 14     | 7    | 0    | 0.2843                           | -1.4064 | -2.6375 |
| 15     | 8    | 0    | 1.4375                           | 0.4012  | -3.3419 |



| 16            | 6    | 0                                | -0.5492 | -2.0814 | -1.7575 |
|---------------|------|----------------------------------|---------|---------|---------|
| 17            | 6    | 0                                | -1.2239 | -1.2696 | -0.6687 |
| 18            | 8    | 0                                | -2.0348 | -1.6916 | 0.1433  |
| 19            | 6    | 0                                | -0.7586 | -3.3947 | -1.9704 |
| 20            | 6    | 0                                | -1.5256 | -4.3573 | -1.2649 |
| 21            | 7    | 0                                | -2.0994 | -5.3856 | -1.9695 |
| 22            | 6    | 0                                | -2.7047 | -6.1253 | -1.0679 |
| 23            | 7    | 0                                | -2.5113 | -5.6345 | 0.1921  |
| 24            | 6    | 0                                | -1.7214 | -4.5227 | 0.0835  |
| 25            | 1    | 0                                | 4.3702  | 2.5594  | 2.432   |
| 26            | 1    | 0                                | 3.2796  | 3.7715  | 4.2866  |
| 27            | 1    | 0                                | 0.897   | 4.4665  | 4.1168  |
| 28            | 1    | 0                                | 3.1118  | 2.011   | 0.371   |
| 29            | 1    | 0                                | -1.2867 | 4.3713  | 2.352   |
| 30            | 1    | 0                                | -1.8642 | 3.4872  | 0.0816  |
| 31            | 1    | 0                                | 1.3831  | 2.3862  | -1.7054 |
| 32            | 1    | 0                                | -0.3525 | 2.4217  | -1.9586 |
| 33            | 1    | 0                                | 1.1185  | 0.1845  | -0.4316 |
| 34            | 1    | 0                                | -1.3216 | 0.5456  | 0.1199  |
| 35            | 1    | 0                                | 0.6239  | -1.8756 | -3.4682 |
| 36            | 1    | 0                                | -0.2806 | -3.8318 | -2.8456 |
| 37            | 1    | 0                                | -3.2863 | -7.0162 | -1.2629 |
| 38            | 1    | 0                                | -2.8763 | -6.0292 | 1.0477  |
| 39            | 1    | 0                                | -1.4017 | -3.9639 | 0.9514  |
| <hr/>         |      |                                  |         |         |         |
| <b>11R-3d</b> |      | Standard Orientation (Ångstroms) |         |         |         |
| No.           | Atom | Type                             | X       | Y       | Z       |
| 1             | 6    | 0                                | -3.1807 | 1.7433  | 0.7715  |
| 2             | 6    | 0                                | -3.5247 | 3.0486  | 1.1115  |
| 3             | 6    | 0                                | -2.6659 | 4.1144  | 0.83    |
| 4             | 6    | 0                                | -1.4509 | 3.8205  | 0.1991  |
| 5             | 6    | 0                                | -1.0753 | 2.5236  | -0.1534 |
| 6             | 6    | 0                                | -1.9633 | 1.4677  | 0.1381  |
| 7             | 7    | 0                                | -0.4334 | 4.6581  | -0.1921 |
| 8             | 6    | 0                                | 0.577   | 3.9378  | -0.7689 |
| 9             | 6    | 0                                | 0.2186  | 2.6033  | -0.7632 |
| 10            | 6    | 0                                | 1.0418  | 1.4686  | -1.2968 |
| 11            | 6    | 0                                | 2.0185  | 0.9082  | -0.25   |
| 12            | 6    | 0                                | 3.0381  | 0.0179  | -0.9558 |
| 13            | 7    | 0                                | 1.3477  | 0.1692  | 0.8147  |
| 14            | 7    | 0                                | 2.7259  | -1.3163 | -1.0274 |
| 15            | 8    | 0                                | 4.0032  | 0.4648  | -1.5729 |
| 16            | 6    | 0                                | 1.6782  | -1.9345 | -0.3625 |
| 17            | 6    | 0                                | 0.8621  | -1.0973 | 0.6013  |
| 18            | 8    | 0                                | -0.1399 | -1.4657 | 1.1972  |

| 19     | 6    | 0    | 1.4608                           | -3.241  | -0.6066 |
|--------|------|------|----------------------------------|---------|---------|
| 20     | 6    | 0    | 0.5258                           | -4.159  | -0.063  |
| 21     | 7    | 0    | 0.0362                           | -5.1558 | -0.8685 |
| 22     | 6    | 0    | -0.7627                          | -5.8592 | -0.0979 |
| 23     | 7    | 0    | -0.7778                          | -5.3757 | 1.1797  |
| 24     | 6    | 0    | 0.0761                           | -4.308  | 1.2253  |
| 25     | 1    | 0    | -3.8609                          | 0.9259  | 0.9987  |
| 26     | 1    | 0    | -4.4758                          | 3.2423  | 1.602   |
| 27     | 1    | 0    | -2.938                           | 5.1311  | 1.0939  |
| 28     | 1    | 0    | -1.7145                          | 0.4417  | -0.1193 |
| 29     | 1    | 0    | -0.4387                          | 5.6611  | -0.0685 |
| 30     | 1    | 0    | 1.4644                           | 4.436   | -1.1377 |
| 31     | 1    | 0    | 1.6014                           | 1.8299  | -2.1702 |
| 32     | 1    | 0    | 0.3793                           | 0.6789  | -1.6735 |
| 33     | 1    | 0    | 2.572                            | 1.7143  | 0.2461  |
| 34     | 1    | 0    | 0.7388                           | 0.7126  | 1.4172  |
| 35     | 1    | 0    | 3.3545                           | -1.8694 | -1.5971 |
| 36     | 1    | 0    | 2.0801                           | -3.708  | -1.3706 |
| 37     | 1    | 0    | -1.3451                          | -6.7184 | -0.4021 |
| 38     | 1    | 0    | -1.3135                          | -5.7482 | 1.9514  |
| 39     | 1    | 0    | 0.2606                           | -3.763  | 2.1402  |
| <hr/>  |      |      |                                  |         |         |
| 11R-3e |      |      | Standard Orientation (Ångstroms) |         |         |
| No.    | Atom | Type | X                                | Y       | Z       |
| 1      | 6    | 0    | 0.9822                           | 5.4493  | -0.3797 |
| 2      | 6    | 0    | -0.1256                          | 6.023   | 0.2391  |
| 3      | 6    | 0    | -1.2565                          | 5.2595  | 0.5424  |
| 4      | 6    | 0    | -1.2328                          | 3.9015  | 0.203   |
| 5      | 6    | 0    | -0.1385                          | 3.2969  | -0.4162 |
| 6      | 6    | 0    | 0.9893                           | 4.0898  | -0.7126 |
| 7      | 7    | 0    | -2.1889                          | 2.9286  | 0.3771  |
| 8      | 6    | 0    | -1.7354                          | 1.7291  | -0.1006 |
| 9      | 6    | 0    | -0.4626                          | 1.9152  | -0.6039 |
| 10     | 6    | 0    | 0.4108                           | 0.863   | -1.2172 |
| 11     | 6    | 0    | 1.4452                           | 0.3043  | -0.2266 |
| 12     | 6    | 0    | 2.3772                           | -0.6424 | -0.9776 |
| 13     | 7    | 0    | 0.832                            | -0.3832 | 0.9056  |
| 14     | 7    | 0    | 2.0072                           | -1.9645 | -0.9911 |
| 15     | 8    | 0    | 3.3116                           | -0.249  | -1.6729 |
| 16     | 6    | 0    | 0.9804                           | -2.5206 | -0.2421 |
| 17     | 6    | 0    | 0.2657                           | -1.6243 | 0.7498  |
| 18     | 8    | 0    | -0.7158                          | -1.9257 | 1.4135  |
| 19     | 6    | 0    | 0.6931                           | -3.8221 | -0.4346 |
| 20     | 6    | 0    | -0.2392                          | -4.6852 | 0.1965  |
| 21     | 7    | 0    | -0.8166                          | -5.6859 | -0.5435 |

|    |   |   |         |         |         |
|----|---|---|---------|---------|---------|
| 22 | 6 | 0 | -1.5894 | -6.3342 | 0.2987  |
| 23 | 7 | 0 | -1.5041 | -5.8122 | 1.5582  |
| 24 | 6 | 0 | -0.6105 | -4.7773 | 1.5147  |
| 25 | 1 | 0 | 1.8507  | 6.062   | -0.6091 |
| 26 | 1 | 0 | -0.1126 | 7.0816  | 0.4889  |
| 27 | 1 | 0 | -2.1188 | 5.7104  | 1.0225  |
| 28 | 1 | 0 | 1.8592  | 3.6568  | -1.1981 |
| 29 | 1 | 0 | -3.0938 | 3.0832  | 0.7997  |
| 30 | 1 | 0 | -2.3553 | 0.8431  | -0.0403 |
| 31 | 1 | 0 | 0.9238  | 1.291   | -2.0884 |
| 32 | 1 | 0 | -0.2204 | 0.0552  | -1.6109 |
| 33 | 1 | 0 | 2.0561  | 1.1065  | 0.2031  |
| 34 | 1 | 0 | 0.2906  | 0.2014  | 1.5322  |
| 35 | 1 | 0 | 2.5715  | -2.5578 | -1.5872 |
| 36 | 1 | 0 | 1.2402  | -4.3346 | -1.2242 |
| 37 | 1 | 0 | -2.2214 | -7.179  | 0.0601  |
| 38 | 1 | 0 | -2.0017 | -6.1406 | 2.374   |
| 39 | 1 | 0 | -0.3471 | -4.2128 | 2.3979  |

Table S25. Boltzmann populations <sup>a</sup> and optical rotation (OR) of low-energy conformers of 11S-3

| Conformers | In MeOH                         |           |
|------------|---------------------------------|-----------|
|            | <i>Boltzmann population (%)</i> | <i>OR</i> |
| 11S-3a     | 11.18                           | -164.58   |
| 11S-3b     | 10.39                           | -62.2     |
| 11S-3c     | 44.25                           | -808.04   |
| 11S-3d     | 4.77                            | -358.28   |
| 11S-3e     | 29.41                           | -521.52   |
| Average    |                                 | -552.95   |

<sup>a</sup> From  $\Delta G$  values at 298.15K.

Table S26. Cartesian coordinates for the low-energy reoptimized MMFF conformers of 11S-3 at B3LYP/6-311+G (d, p) level of theory in MeOH

| 11S-3a |      |      | Standard Orientation a(Ångstroms) |        |         |
|--------|------|------|-----------------------------------|--------|---------|
| No.    | Atom | Type | X                                 | Y      | Z       |
| 1      | 6    | 0    | -3.0868                           | 3.8654 | -1.0553 |
| 2      | 6    | 0    | -3.5729                           | 4.4104 | 0.1304  |
| 3      | 6    | 0    | -2.8087                           | 4.3855 | 1.3004  |
| 4      | 6    | 0    | -1.5423                           | 3.7922 | 1.2359  |
| 5      | 6    | 0    | -1.0281                           | 3.2343 | 0.0653  |

|               |      |      |                                  |         |         |
|---------------|------|------|----------------------------------|---------|---------|
| 6             | 6    | 0    | -1.8181                          | 3.2759  | -1.1022 |
| 7             | 7    | 0    | -0.5882                          | 3.6343  | 2.2134  |
| 8             | 6    | 0    | 0.5075                           | 2.9899  | 1.7057  |
| 9             | 6    | 0    | 0.2723                           | 2.7183  | 0.3717  |
| 10            | 6    | 0    | 1.2031                           | 2.0149  | -0.5722 |
| 11            | 6    | 0    | 0.8158                           | 0.5483  | -0.8085 |
| 12            | 6    | 0    | 1.6959                           | -0.0609 | -1.9031 |
| 13            | 7    | 0    | 0.9043                           | -0.251  | 0.4089  |
| 14            | 7    | 0    | 1.7711                           | -1.4329 | -1.9015 |
| 15            | 8    | 0    | 2.178                            | 0.58    | -2.8344 |
| 16            | 6    | 0    | 1.2918                           | -2.2642 | -0.9002 |
| 17            | 6    | 0    | 0.7301                           | -1.6124 | 0.3473  |
| 18            | 8    | 0    | 0.1885                           | -2.1902 | 1.2787  |
| 19            | 6    | 0    | 1.3718                           | -3.5945 | -1.0944 |
| 20            | 6    | 0    | 1.0315                           | -4.693  | -0.2635 |
| 21            | 7    | 0    | 0.584                            | -5.8492 | -0.8516 |
| 22            | 6    | 0    | 0.3857                           | -6.6861 | 0.1418  |
| 23            | 7    | 0    | 0.7228                           | -6.1263 | 1.3413  |
| 24            | 6    | 0    | 1.1773                           | -4.8604 | 1.091   |
| 25            | 1    | 0    | -3.6963                          | 3.8989  | -1.955  |
| 26            | 1    | 0    | -4.561                           | 4.8648  | 0.1468  |
| 27            | 1    | 0    | -3.1896                          | 4.814   | 2.2216  |
| 28            | 1    | 0    | -1.4501                          | 2.8601  | -2.0354 |
| 29            | 1    | 0    | -0.6882                          | 3.954   | 3.1669  |
| 30            | 1    | 0    | 1.3625                           | 2.7812  | 2.3358  |
| 31            | 1    | 0    | 2.2278                           | 2.0694  | -0.1806 |
| 32            | 1    | 0    | 1.2117                           | 2.5645  | -1.5222 |
| 33            | 1    | 0    | -0.2213                          | 0.4766  | -1.1621 |
| 34            | 1    | 0    | 0.4274                           | 0.132   | 1.2178  |
| 35            | 1    | 0    | 2.2511                           | -1.8328 | -2.6985 |
| 36            | 1    | 0    | 1.7399                           | -3.9274 | -2.0635 |
| 37            | 1    | 0    | 0.0089                           | -7.6964 | 0.0561  |
| 38            | 1    | 0    | 0.6585                           | -6.5721 | 2.2458  |
| 39            | 1    | 0    | 1.5322                           | -4.215  | 1.8818  |
| <hr/>         |      |      |                                  |         |         |
| <b>11S-3b</b> |      |      | Standard Orientation (Ångstroms) |         |         |
| No.           | Atom | Type | X                                | Y       | Z       |
| 1             | 6    | 0    | 0.5464                           | 3.1427  | 3.2775  |
| 2             | 6    | 0    | -0.6231                          | 3.7674  | 3.7026  |
| 3             | 6    | 0    | -1.654                           | 4.0537  | 2.8032  |
| 4             | 6    | 0    | -1.4679                          | 3.6876  | 1.4648  |
| 5             | 6    | 0    | -0.3095                          | 3.0597  | 1.0071  |
| 6             | 6    | 0    | 0.7166                           | 2.7852  | 1.9351  |
| 7             | 7    | 0    | -2.2983                          | 3.8461  | 0.3806  |
| 8             | 6    | 0    | -1.7125                          | 3.3306  | -0.7441 |

| 9      | 6    | 0    | -0.4731                          | 2.8281  | -0.3972 |
|--------|------|------|----------------------------------|---------|---------|
| 10     | 6    | 0    | 0.5065                           | 2.1674  | -1.3223 |
| 11     | 6    | 0    | 0.2368                           | 0.6673  | -1.5048 |
| 12     | 6    | 0    | 1.1521                           | 0.0952  | -2.5918 |
| 13     | 7    | 0    | 0.4104                           | -0.0884 | -0.2707 |
| 14     | 7    | 0    | 1.31                             | -1.27   | -2.5646 |
| 15     | 8    | 0    | 1.5865                           | 0.7454  | -3.5399 |
| 16     | 6    | 0    | 0.8746                           | -2.1084 | -1.549  |
| 17     | 6    | 0    | 0.3703                           | -1.461  | -0.2739 |
| 18     | 8    | 0    | 0.0116                           | -2.0504 | 0.7354  |
| 19     | 6    | 0    | 0.9944                           | -3.4369 | -1.7351 |
| 20     | 6    | 0    | 0.6429                           | -4.5434 | -0.9196 |
| 21     | 7    | 0    | 1.4005                           | -5.6851 | -0.9993 |
| 22     | 6    | 0    | 0.8312                           | -6.5346 | -0.1743 |
| 23     | 7    | 0    | -0.2839                          | -5.9979 | 0.4039  |
| 24     | 6    | 0    | -0.4397                          | -4.7347 | -0.0979 |
| 25     | 1    | 0    | 1.3367                           | 2.9299  | 3.9933  |
| 26     | 1    | 0    | -0.7365                          | 4.0383  | 4.7499  |
| 27     | 1    | 0    | -2.5629                          | 4.5426  | 3.1379  |
| 28     | 1    | 0    | 1.6352                           | 2.2996  | 1.6181  |
| 29     | 1    | 0    | -3.2089                          | 4.2829  | 0.4169  |
| 30     | 1    | 0    | -2.2254                          | 3.3696  | -1.6963 |
| 31     | 1    | 0    | 1.5274                           | 2.322   | -0.9497 |
| 32     | 1    | 0    | 0.4592                           | 2.679   | -2.2927 |
| 33     | 1    | 0    | -0.7964                          | 0.5028  | -1.8386 |
| 34     | 1    | 0    | -0.0286                          | 0.2892  | 0.5626  |
| 35     | 1    | 0    | 1.8002                           | -1.658  | -3.3613 |
| 36     | 1    | 0    | 1.4583                           | -3.7614 | -2.6651 |
| 37     | 1    | 0    | 1.1728                           | -7.5382 | 0.0403  |
| 38     | 1    | 0    | -0.8881                          | -6.4563 | 1.0716  |
| 39     | 1    | 0    | -1.272                           | -4.1073 | 0.1873  |
| <hr/>  |      |      |                                  |         |         |
| 11S-3c |      |      | Standard Orientation (Ångstroms) |         |         |
| No.    | Atom | Type | X                                | Y       | Z       |
| 1      | 6    | 0    | -3.0937                          | 3.7089  | -1.1715 |
| 2      | 6    | 0    | -3.6326                          | 4.26    | -0.0118 |
| 3      | 6    | 0    | -2.8983                          | 4.295   | 1.177   |
| 4      | 6    | 0    | -1.6068                          | 3.7551  | 1.1582  |
| 5      | 6    | 0    | -1.0397                          | 3.1924  | 0.0146  |
| 6      | 6    | 0    | -1.8006                          | 3.1731  | -1.1727 |
| 7      | 7    | 0    | -0.6718                          | 3.6621  | 2.1621  |
| 8      | 6    | 0    | 0.4626                           | 3.0531  | 1.6975  |
| 9      | 6    | 0    | 0.273                            | 2.7398  | 0.3654  |
| 10     | 6    | 0    | 1.2566                           | 2.0541  | -0.5371 |
| 11     | 6    | 0    | 0.9357                           | 0.5678  | -0.7466 |

|    |   |   |         |         |         |
|----|---|---|---------|---------|---------|
| 12 | 6 | 0 | 1.8733  | -0.0344 | -1.7969 |
| 13 | 7 | 0 | 1.0266  | -0.199  | 0.4893  |
| 14 | 7 | 0 | 1.9761  | -1.4052 | -1.7709 |
| 15 | 8 | 0 | 2.3714  | 0.603   | -2.7219 |
| 16 | 6 | 0 | 1.4635  | -2.2299 | -0.78   |
| 17 | 6 | 0 | 0.9321  | -1.5686 | 0.477   |
| 18 | 8 | 0 | 0.5096  | -2.1463 | 1.4684  |
| 19 | 6 | 0 | 1.5361  | -3.5614 | -0.969  |
| 20 | 6 | 0 | 1.1021  | -4.6549 | -0.1761 |
| 21 | 7 | 0 | 1.8154  | -5.8263 | -0.2248 |
| 22 | 6 | 0 | 1.1721  | -6.6543 | 0.5671  |
| 23 | 7 | 0 | 0.053   | -6.074  | 1.0932  |
| 24 | 6 | 0 | -0.0259 | -4.8036 | 0.5916  |
| 25 | 1 | 0 | -3.6804 | 3.6964  | -2.0868 |
| 26 | 1 | 0 | -4.6387 | 4.6729  | -0.031  |
| 27 | 1 | 0 | -3.32   | 4.7289  | 2.0777  |
| 28 | 1 | 0 | -1.391  | 2.7527  | -2.0864 |
| 29 | 1 | 0 | -0.8087 | 4.0004  | 3.1046  |
| 30 | 1 | 0 | 1.3095  | 2.8966  | 2.3532  |
| 31 | 1 | 0 | 2.2676  | 2.1607  | -0.1213 |
| 32 | 1 | 0 | 1.2674  | 2.5804  | -1.5002 |
| 33 | 1 | 0 | -0.0873 | 0.444   | -1.1255 |
| 34 | 1 | 0 | 0.5681  | 0.1954  | 1.303   |
| 35 | 1 | 0 | 2.4832  | -1.8093 | -2.5487 |
| 36 | 1 | 0 | 2.0259  | -3.9012 | -1.8801 |
| 37 | 1 | 0 | 1.4612  | -7.6719 | 0.7925  |
| 38 | 1 | 0 | -0.6017 | -6.5096 | 1.7277  |
| 39 | 1 | 0 | -0.8446 | -4.143  | 0.839   |

| 11S-3d |      |      | Standard Orientation (Ångstroms) |         |         |
|--------|------|------|----------------------------------|---------|---------|
| No.    | Atom | Type | X                                | Y       | Z       |
| 1      | 6    | 0    | 0.7974                           | 0.6992  | 3.5533  |
| 2      | 6    | 0    | 0.7777                           | 1.8363  | 4.3562  |
| 3      | 6    | 0    | 0.8025                           | 3.1145  | 3.7921  |
| 4      | 6    | 0    | 0.8445                           | 3.2077  | 2.3956  |
| 5      | 6    | 0    | 0.8637                           | 2.0883  | 1.5626  |
| 6      | 6    | 0    | 0.8428                           | 0.8105  | 2.1588  |
| 7      | 7    | 0    | 0.878                            | 4.3174  | 1.5849  |
| 8      | 6    | 0    | 0.9063                           | 3.9416  | 0.2694  |
| 9      | 6    | 0    | 0.8965                           | 2.5611  | 0.2106  |
| 10     | 6    | 0    | 0.9152                           | 1.7333  | -1.0401 |
| 11     | 6    | 0    | -0.4952                          | 1.4744  | -1.5946 |
| 12     | 6    | 0    | -0.373                           | 0.9413  | -3.0198 |
| 13     | 7    | 0    | -1.2692                          | 0.5519  | -0.7702 |
| 14     | 7    | 0    | -0.3316                          | -0.4239 | -3.151  |

| 15     | 8    | 0    | -0.1577                          | 1.6661    | -3.9893   |
|--------|------|------|----------------------------------|-----------|-----------|
| 16     | 6    | 0    | -0.5759                          | -1.3378   | -2.1375   |
| 17     | 6    | 0    | -1.0209                          | -0.7984   | -0.7933   |
| 18     | 8    | 0    | -1.193                           | -1.4591   | 0.2209    |
| 19     | 6    | 0    | -0.4138                          | -2.6454   | -2.4159   |
| 20     | 6    | 0    | -0.6282                          | -3.8095   | -1.6341   |
| 21     | 7    | 0    | 0.1886                           | -4.8944   | -1.8296   |
| 22     | 6    | 0    | -0.2627                          | -5.8166   | -1.0095   |
| 23     | 7    | 0    | -1.3591                          | -5.3801   | -0.3213   |
| 24     | 6    | 0    | -1.6283                          | -4.1066   | -0.7421   |
| 25     | 1    | 0    | 0.777                            | -0.2877   | 4.0094    |
| 26     | 1    | 0    | 0.7437                           | 1.7287    | 5.4379    |
| 27     | 1    | 0    | 0.7895                           | 3.9989    | 4.4206    |
| 28     | 1    | 0    | 0.8582                           | -0.0897   | 1.5505    |
| 29     | 1    | 0    | 0.8817                           | 5.2707    | 1.9202    |
| 30     | 1    | 0    | 0.9343                           | 4.6883    | -0.5137   |
| 31     | 1    | 0    | 1.4377                           | 0.7876    | -0.8474   |
| 32     | 1    | 0    | 1.5187                           | 2.2592    | -1.7923   |
| 33     | 1    | 0    | -1.0794                          | 2.4013    | -1.6381   |
| 34     | 1    | 0    | -1.5048                          | 0.8786    | 0.1608    |
| 35     | 1    | 0    | -0.1349                          | -0.7545   | -4.0879   |
| 36     | 1    | 0    | -0.0276                          | -2.8936   | -3.4031   |
| 37     | 1    | 0    | 0.1535                           | -6.8059   | -0.8745   |
| 38     | 1    | 0    | -1.8813                          | -5.9078   | 0.3641    |
| 39     | 1    | 0    | -2.4706                          | -3.5458   | -0.3625   |
| 11S-3e |      |      | Standard Orientation (Ångstroms) |           |           |
| No.    | Atom | Type | X                                | Y         | Z         |
| 1      | 6    | 0    | 5.712965                         | 0.698866  | 0.303301  |
| 2      | 6    | 0    | 6.219716                         | -0.594742 | 0.399344  |
| 3      | 6    | 0    | 5.410167                         | -1.705643 | 0.14591   |
| 4      | 6    | 0    | 4.075674                         | -1.469559 | -0.205335 |
| 5      | 6    | 0    | 3.537665                         | -0.186442 | -0.308795 |
| 6      | 6    | 0    | 4.376099                         | 0.917262  | -0.049413 |
| 7      | 7    | 0    | 3.069344                         | -2.356778 | -0.507156 |
| 8      | 6    | 0    | 1.912525                         | -1.681969 | -0.788179 |
| 9      | 6    | 0    | 2.161492                         | -0.327837 | -0.676678 |
| 10     | 6    | 0    | 1.170694                         | 0.776143  | -0.889964 |
| 11     | 6    | 0    | 0.581871                         | 1.303156  | 0.428716  |
| 12     | 6    | 0    | -0.293916                        | 2.514473  | 0.121702  |
| 13     | 7    | 0    | -0.187179                        | 0.293346  | 1.149538  |
| 14     | 7    | 0    | -1.622242                        | 2.253059  | -0.107236 |
| 15     | 8    | 0    | 0.164309                         | 3.637539  | -0.078428 |
| 16     | 6    | 0    | -2.248487                        | 1.031597  | 0.093969  |
| 17     | 6    | 0    | -1.431459                        | -0.086635 | 0.710361  |

|    |   |   |           |           |           |
|----|---|---|-----------|-----------|-----------|
| 18 | 8 | 0 | -1.797225 | -1.242883 | 0.865486  |
| 19 | 6 | 0 | -3.543448 | 0.921485  | -0.258678 |
| 20 | 6 | 0 | -4.466527 | -0.148582 | -0.134959 |
| 21 | 7 | 0 | -5.436586 | -0.296401 | -1.093855 |
| 22 | 6 | 0 | -6.153611 | -1.32545  | -0.701744 |
| 23 | 7 | 0 | -5.704957 | -1.82226  | 0.489073  |
| 24 | 6 | 0 | -4.646131 | -1.051063 | 0.883499  |
| 25 | 1 | 0 | 6.360813  | 1.549155  | 0.502111  |
| 26 | 1 | 0 | 7.261658  | -0.743984 | 0.673477  |
| 27 | 1 | 0 | 5.808972  | -2.712031 | 0.219442  |
| 28 | 1 | 0 | 3.995674  | 1.93191   | -0.123622 |
| 29 | 1 | 0 | 3.174742  | -3.361932 | -0.51628  |
| 30 | 1 | 0 | 1.008431  | -2.221768 | -1.041844 |
| 31 | 1 | 0 | 0.371233  | 0.419817  | -1.553136 |
| 32 | 1 | 0 | 1.662764  | 1.595066  | -1.430838 |
| 33 | 1 | 0 | 1.373051  | 1.625779  | 1.115239  |
| 34 | 1 | 0 | 0.344827  | -0.494785 | 1.500418  |
| 35 | 1 | 0 | -2.164162 | 3.048974  | -0.421086 |
| 36 | 1 | 0 | -3.993759 | 1.782075  | -0.750458 |
| 37 | 1 | 0 | -6.999291 | -1.748089 | -1.227399 |
| 38 | 1 | 0 | -6.093933 | -2.608273 | 0.991005  |
| 39 | 1 | 0 | -4.128079 | -1.226285 | 1.81561   |

Table S27. Gibbs free energies <sup>a</sup> and equilibrium populations <sup>b</sup> of low-energy conformers of 11R-3

| Conformers | In MeOH       |        |
|------------|---------------|--------|
|            | G             | P (%)  |
| 11R-3a     | -1081.1530967 | 3.29%  |
| 11R-3b     | -1081.154545  | 15.27% |
| 11R-3c     | -1081.1544924 | 14.44% |
| 11R-3d     | -1081.1558426 | 60.44% |
| 11R-3e     | -1081.1537464 | 6.55%  |

<sup>a</sup> B3LYP/6-31+g (d, p), in kcal/mol; <sup>b</sup> from G values at 298.15K.

Table S28. Cartesian coordinates for the low-energy reoptimized MMFF conformers of 11R-3 at B3LYP/6-31+g (d, p) level of theory in MeOH

| 11R-3a |      |      | Standard Orientation (Ångstroms) |           |           |
|--------|------|------|----------------------------------|-----------|-----------|
| No.    | Atom | Type | X                                | Y         | Z         |
| 1      | 6    | 0    | -3.917693                        | -2.220124 | -1.551121 |
| 2      | 6    | 0    | -4.833637                        | -2.644676 | -0.592059 |
| 3      | 6    | 0    | -5.075062                        | -1.887179 | 0.557455  |
| 4      | 6    | 0    | -4.362637                        | -0.691405 | 0.708444  |
| 5      | 6    | 0    | -3.438055                        | -0.238758 | -0.232794 |



| 6             | 6    | 0    | −3.214903                        | −1.021315 | −1.384823 |
|---------------|------|------|----------------------------------|-----------|-----------|
| 7             | 7    | 0    | −4.399281                        | 0.238564  | 1.720399  |
| 8             | 6    | 0    | −3.524055                        | 1.25796   | 1.458591  |
| 9             | 6    | 0    | −2.902181                        | 0.99804   | 0.252553  |
| 10            | 6    | 0    | −1.863154                        | 1.852984  | −0.411729 |
| 11            | 6    | 0    | −0.442501                        | 1.568106  | 0.095593  |
| 12            | 6    | 0    | 0.539115                         | 2.589699  | −0.486163 |
| 13            | 7    | 0    | 0.002684                         | 0.213759  | −0.215213 |
| 14            | 7    | 0    | 1.858533                         | 2.206428  | −0.48196  |
| 15            | 8    | 0    | 0.235504                         | 3.741588  | −0.788531 |
| 16            | 6    | 0    | 2.325893                         | 0.934322  | −0.188437 |
| 17            | 6    | 0    | 1.29986                          | −0.154979 | 0.049538  |
| 18            | 8    | 0    | 1.537513                         | −1.297688 | 0.412868  |
| 19            | 6    | 0    | 3.658928                         | 0.7462    | −0.150533 |
| 20            | 6    | 0    | 4.442991                         | −0.417631 | 0.058348  |
| 21            | 7    | 0    | 5.656686                         | −0.289955 | 0.685802  |
| 22            | 6    | 0    | 6.162299                         | −1.502594 | 0.706579  |
| 23            | 7    | 0    | 5.338815                         | −2.397929 | 0.085249  |
| 24            | 6    | 0    | 4.250009                         | −1.706834 | −0.371242 |
| 25            | 1    | 0    | −3.745598                        | −2.823977 | −2.438706 |
| 26            | 1    | 0    | −5.37066                         | −3.579013 | −0.739135 |
| 27            | 1    | 0    | −5.790608                        | −2.220403 | 1.302002  |
| 28            | 1    | 0    | −2.504091                        | −0.702253 | −2.141569 |
| 29            | 1    | 0    | −4.990486                        | 0.171914  | 2.537248  |
| 30            | 1    | 0    | −3.420606                        | 2.082951  | 2.151359  |
| 31            | 1    | 0    | −2.122054                        | 2.905385  | −0.235366 |
| 32            | 1    | 0    | −1.908072                        | 1.709882  | −1.499098 |
| 33            | 1    | 0    | −0.399866                        | 1.675282  | 1.187856  |
| 34            | 1    | 0    | −0.636369                        | −0.530012 | 0.046731  |
| 35            | 1    | 0    | 2.512151                         | 2.930978  | −0.752929 |
| 36            | 1    | 0    | 4.282915                         | 1.629211  | −0.278594 |
| 37            | 1    | 0    | 7.107658                         | −1.789566 | 1.1471    |
| 38            | 1    | 0    | 5.51006                          | −3.387544 | −0.025914 |
| 39            | 1    | 0    | 3.458127                         | −2.190998 | −0.924824 |
| <b>11R-3b</b> |      |      | Standard Orientation (Ångstroms) |           |           |
| No.           | Atom | Type | X                                | Y         | Z         |
| 1             | 6    | 0    | −4.766105                        | −0.203346 | 2.25035   |
| 2             | 6    | 0    | −5.482035                        | −1.3047   | 1.788368  |
| 3             | 6    | 0    | −5.293391                        | −1.793747 | 0.492622  |
| 4             | 6    | 0    | −4.359556                        | −1.138454 | −0.318883 |
| 5             | 6    | 0    | −3.623968                        | −0.035458 | 0.114976  |
| 6             | 6    | 0    | −3.836116                        | 0.440185  | 1.425583  |
| 7             | 7    | 0    | −3.980471                        | −1.394001 | −1.615518 |

| 8      | 6    | 0    | -3.026028                        | -0.49785  | -2.015101 |
|--------|------|------|----------------------------------|-----------|-----------|
| 9      | 6    | 0    | -2.771547                        | 0.362936  | -0.964723 |
| 10     | 6    | 0    | -1.787807                        | 1.496121  | -0.959405 |
| 11     | 6    | 0    | -0.484472                        | 1.15023   | -0.225478 |
| 12     | 6    | 0    | 0.401593                         | 2.393229  | -0.107955 |
| 13     | 7    | 0    | 0.249087                         | 0.071353  | -0.878389 |
| 14     | 7    | 0    | 1.735941                         | 2.145919  | 0.107453  |
| 15     | 8    | 0    | -0.03024                         | 3.541537  | -0.035317 |
| 16     | 6    | 0    | 2.347489                         | 0.903647  | 0.027798  |
| 17     | 6    | 0    | 1.50489                          | -0.267521 | -0.435526 |
| 18     | 8    | 0    | 1.859118                         | -1.436956 | -0.475374 |
| 19     | 6    | 0    | 3.652435                         | 0.822495  | 0.350916  |
| 20     | 6    | 0    | 4.567331                         | -0.261328 | 0.322419  |
| 21     | 7    | 0    | 5.572757                         | -0.298573 | 1.255566  |
| 22     | 6    | 0    | 6.270608                         | -1.373855 | 0.966755  |
| 23     | 7    | 0    | 5.77587                          | -2.008801 | -0.136774 |
| 24     | 6    | 0    | 4.706516                         | -1.282354 | -0.584222 |
| 25     | 1    | 0    | -4.931093                        | 0.163047  | 3.260598  |
| 26     | 1    | 0    | -6.200946                        | -1.79105  | 2.443974  |
| 27     | 1    | 0    | -5.855446                        | -2.650266 | 0.135018  |
| 28     | 1    | 0    | -3.289372                        | 1.3014    | 1.797868  |
| 29     | 1    | 0    | -4.359169                        | -2.137123 | -2.186126 |
| 30     | 1    | 0    | -2.610426                        | -0.546925 | -3.013329 |
| 31     | 1    | 0    | -2.267064                        | 2.367287  | -0.494572 |
| 32     | 1    | 0    | -1.564323                        | 1.788718  | -1.994175 |
| 33     | 1    | 0    | -0.696852                        | 0.816918  | 0.798973  |
| 34     | 1    | 0    | -0.291641                        | -0.761446 | -1.084682 |
| 35     | 1    | 0    | 2.293274                         | 2.96745   | 0.307345  |
| 36     | 1    | 0    | 4.121479                         | 1.729631  | 0.728397  |
| 37     | 1    | 0    | 7.133336                         | -1.736414 | 1.50939   |
| 38     | 1    | 0    | 6.141953                         | -2.854282 | -0.551891 |
| 39     | 1    | 0    | 4.153946                         | -1.566237 | -1.468586 |
| 11R-3c |      |      | Standard Orientation (Ångstroms) |           |           |
| No.    | Atom | Type | X                                | Y         | Z         |
| 1      | 6    | 0    | -3.956944                        | -2.09458  | -1.700437 |
| 2      | 6    | 0    | -4.85896                         | -2.585242 | -0.759963 |
| 3      | 6    | 0    | -5.077943                        | -1.91339  | 0.4459    |
| 4      | 6    | 0    | -4.357093                        | -0.734834 | 0.672596  |
| 5      | 6    | 0    | -3.44571                         | -0.217586 | -0.24802  |
| 6      | 6    | 0    | -3.245885                        | -0.913622 | -1.458349 |
| 7      | 7    | 0    | -4.37327                         | 0.118872  | 1.750147  |
| 8      | 6    | 0    | -3.49663                         | 1.150933  | 1.550052  |
| 9      | 6    | 0    | -2.895581                        | 0.977983  | 0.318098  |

|    |   |   |           |           |           |
|----|---|---|-----------|-----------|-----------|
| 10 | 6 | 0 | -1.864406 | 1.876366  | -0.29941  |
| 11 | 6 | 0 | -0.435907 | 1.546027  | 0.154734  |
| 12 | 6 | 0 | 0.541295  | 2.60497   | -0.365236 |
| 13 | 7 | 0 | -0.000982 | 0.223931  | -0.277979 |
| 14 | 7 | 0 | 1.860818  | 2.22088   | -0.390965 |
| 15 | 8 | 0 | 0.237606  | 3.775823  | -0.582636 |
| 16 | 6 | 0 | 2.326347  | 0.932526  | -0.172994 |
| 17 | 6 | 0 | 1.299592  | -0.181233 | -0.105323 |
| 18 | 8 | 0 | 1.542749  | -1.37324  | 0.016951  |
| 19 | 6 | 0 | 3.658876  | 0.747781  | -0.107076 |
| 20 | 6 | 0 | 4.444802  | -0.412896 | 0.111957  |
| 21 | 7 | 0 | 5.680765  | -0.490412 | -0.479529 |
| 22 | 6 | 0 | 6.182547  | -1.637143 | -0.079914 |
| 23 | 7 | 0 | 5.334744  | -2.282247 | 0.774919  |
| 24 | 6 | 0 | 4.233372  | -1.487406 | 0.939413  |
| 25 | 1 | 0 | -3.801981 | -2.632084 | -2.632864 |
| 26 | 1 | 0 | -5.402697 | -3.504314 | -0.966671 |
| 27 | 1 | 0 | -5.783367 | -2.297752 | 1.175328  |
| 28 | 1 | 0 | -2.546642 | -0.542517 | -2.20226  |
| 29 | 1 | 0 | -4.953389 | -0.004387 | 2.568431  |
| 30 | 1 | 0 | -3.378674 | 1.92293   | 2.299311  |
| 31 | 1 | 0 | -2.1125   | 2.913239  | -0.036477 |
| 32 | 1 | 0 | -1.932729 | 1.818548  | -1.393479 |
| 33 | 1 | 0 | -0.370172 | 1.562068  | 1.250823  |
| 34 | 1 | 0 | -0.647274 | -0.543253 | -0.124603 |
| 35 | 1 | 0 | 2.516459  | 2.963281  | -0.602341 |
| 36 | 1 | 0 | 4.28338   | 1.625952  | -0.262805 |
| 37 | 1 | 0 | 7.141524  | -2.046238 | -0.368111 |
| 38 | 1 | 0 | 5.498241  | -3.177864 | 1.213242  |
| 39 | 1 | 0 | 3.421822  | -1.767368 | 1.595631  |

| 11R-3d |      |      | Standard Orientation (Ångstroms) |           |           |
|--------|------|------|----------------------------------|-----------|-----------|
| No.    | Atom | Type | X                                | Y         | Z         |
| 1      | 6    | 0    | -4.688651                        | -0.537292 | 2.237837  |
| 2      | 6    | 0    | -5.412051                        | -1.562548 | 1.634014  |
| 3      | 6    | 0    | -5.25446                         | -1.851295 | 0.27563   |
| 4      | 6    | 0    | -4.343634                        | -1.075444 | -0.451409 |
| 5      | 6    | 0    | -3.601078                        | -0.044451 | 0.124387  |
| 6      | 6    | 0    | -3.781757                        | 0.228693  | 1.496083  |
| 7      | 7    | 0    | -3.997256                        | -1.131003 | -1.780922 |
| 8      | 6    | 0    | -3.056138                        | -0.178617 | -2.065063 |
| 9      | 6    | 0    | -2.77753                         | 0.516831  | -0.904254 |
| 10     | 6    | 0    | -1.797033                        | 1.642911  | -0.754052 |
| 11     | 6    | 0    | -0.475646                        | 1.199248  | -0.111229 |

| 12     | 6    | 0    | 0.415609                         | 2.414113  | 0.161757  |
|--------|------|------|----------------------------------|-----------|-----------|
| 13     | 7    | 0    | 0.245684                         | 0.23663   | -0.933932 |
| 14     | 7    | 0    | 1.75041                          | 2.132576  | 0.333484  |
| 15     | 8    | 0    | -0.010871                        | 3.542459  | 0.396299  |
| 16     | 6    | 0    | 2.348604                         | 0.90377   | 0.09526   |
| 17     | 6    | 0    | 1.519855                         | -0.15528  | -0.605598 |
| 18     | 8    | 0    | 1.910815                         | -1.261643 | -0.949408 |
| 19     | 6    | 0    | 3.642999                         | 0.756715  | 0.437232  |
| 20     | 6    | 0    | 4.526843                         | -0.349029 | 0.343649  |
| 21     | 7    | 0    | 5.86158                          | -0.108029 | 0.134627  |
| 22     | 6    | 0    | 6.428639                         | -1.293334 | 0.128505  |
| 23     | 7    | 0    | 5.5177                           | -2.283832 | 0.36275   |
| 24     | 6    | 0    | 4.299648                         | -1.687778 | 0.543655  |
| 25     | 1    | 0    | -4.830316                        | -0.326228 | 3.294967  |
| 26     | 1    | 0    | -6.113223                        | -2.145986 | 2.226593  |
| 27     | 1    | 0    | -5.822912                        | -2.648219 | -0.192453 |
| 28     | 1    | 0    | -3.229617                        | 1.02946   | 1.978978  |
| 29     | 1    | 0    | -4.388499                        | -1.782348 | -2.447405 |
| 30     | 1    | 0    | -2.666157                        | -0.074598 | -3.069469 |
| 31     | 1    | 0    | -2.266389                        | 2.432252  | -0.152837 |
| 32     | 1    | 0    | -1.60002                         | 2.087615  | -1.738754 |
| 33     | 1    | 0    | -0.661054                        | 0.716983  | 0.857438  |
| 34     | 1    | 0    | -0.293925                        | -0.53653  | -1.306644 |
| 35     | 1    | 0    | 2.31314                          | 2.9128    | 0.649995  |
| 36     | 1    | 0    | 4.143118                         | 1.630982  | 0.850676  |
| 37     | 1    | 0    | 7.478919                         | -1.494612 | -0.034177 |
| 38     | 1    | 0    | 5.712569                         | -3.274335 | 0.405856  |
| 39     | 1    | 0    | 3.412673                         | -2.261445 | 0.771631  |
| 11R-3e |      |      | Standard Orientation (Ångstroms) |           |           |
| No.    | Atom | Type | X                                | Y         | Z         |
| 1      | 6    | 0    | -2.521089                        | -3.000259 | -0.281262 |
| 2      | 6    | 0    | -3.868583                        | -3.191178 | 0.011562  |
| 3      | 6    | 0    | -4.739849                        | -2.104575 | 0.126027  |
| 4      | 6    | 0    | -4.207916                        | -0.822848 | -0.060955 |
| 5      | 6    | 0    | -2.862289                        | -0.597094 | -0.35386  |
| 6      | 6    | 0    | -2.006595                        | -1.712104 | -0.46837  |
| 7      | 7    | 0    | -4.823729                        | 0.405195  | -0.010212 |
| 8      | 6    | 0    | -3.915267                        | 1.40024   | -0.249125 |
| 9      | 6    | 0    | -2.680304                        | 0.819459  | -0.46625  |
| 10     | 6    | 0    | -1.403742                        | 1.549887  | -0.760367 |
| 11     | 6    | 0    | -0.656629                        | 1.965451  | 0.517563  |
| 12     | 6    | 0    | 0.419892                         | 2.982986  | 0.148895  |
| 13     | 7    | 0    | -0.06673                         | 0.833139  | 1.224312  |

|    |   |   |           |           |           |
|----|---|---|-----------|-----------|-----------|
| 14 | 7 | 0 | 1.663757  | 2.472104  | -0.12423  |
| 15 | 8 | 0 | 0.175985  | 4.170147  | -0.058232 |
| 16 | 6 | 0 | 2.05902   | 1.160081  | 0.086334  |
| 17 | 6 | 0 | 1.075682  | 0.226832  | 0.763083  |
| 18 | 8 | 0 | 1.235346  | -0.971789 | 0.943274  |
| 19 | 6 | 0 | 3.294535  | 0.802628  | -0.312994 |
| 20 | 6 | 0 | 4.005932  | -0.419315 | -0.198258 |
| 21 | 7 | 0 | 4.882637  | -0.76752  | -1.194452 |
| 22 | 6 | 0 | 5.41152   | -1.905501 | -0.804508 |
| 23 | 7 | 0 | 4.936602  | -2.283936 | 0.419163  |
| 24 | 6 | 0 | 4.062826  | -1.318009 | 0.837539  |
| 25 | 1 | 0 | -1.85731  | -3.857373 | -0.365946 |
| 26 | 1 | 0 | -4.249297 | -4.200085 | 0.1522    |
| 27 | 1 | 0 | -5.790085 | -2.256676 | 0.351924  |
| 28 | 1 | 0 | -0.951888 | -1.585343 | -0.696921 |
| 29 | 1 | 0 | -5.807015 | 0.544622  | 0.176615  |
| 30 | 1 | 0 | -4.224864 | 2.437373  | -0.24782  |
| 31 | 1 | 0 | -1.645908 | 2.441305  | -1.354748 |
| 32 | 1 | 0 | -0.764294 | 0.929522  | -1.401121 |
| 33 | 1 | 0 | -1.334033 | 2.446632  | 1.233017  |
| 34 | 1 | 0 | -0.720999 | 0.163142  | 1.614496  |
| 35 | 1 | 0 | 2.331511  | 3.146678  | -0.477528 |
| 36 | 1 | 0 | 3.875821  | 1.554113  | -0.844639 |
| 37 | 1 | 0 | 6.13544   | -2.491451 | -1.354683 |
| 38 | 1 | 0 | 5.194325  | -3.119227 | 0.925952  |
| 39 | 1 | 0 | 3.567335  | -1.373052 | 1.79646   |

Table S29. Gibbs free energies <sup>a</sup> and equilibrium populations <sup>b</sup> of low-energy conformers of 11S-3

| Conformers | In MeOH       |        |
|------------|---------------|--------|
|            | G             | P (%)  |
| 11S-3a     | -1081.1530917 | 3.27%  |
| 11S-3b     | -1081.1545526 | 15.37% |
| 11S-3c     | -1081.1544858 | 14.35% |
| 11S-3d     | -1081.1558427 | 60.49% |
| 11S-3e     | -1081.1537412 | 6.52%  |

<sup>a</sup> B3LYP/6-31+g (d, p), in kcal/mol; <sup>b</sup> from G values at 298.15K

Table S30. Cartesian coordinates for the low-energy reoptimized MMFF conformers of 11S-3 at B3LYP/6-31+g (d, p) level of theory in MeOH

| 11S-3a |      |      | Standard Orientation (Ångstroms) |           |           |
|--------|------|------|----------------------------------|-----------|-----------|
| No.    | Atom | Type | X                                | Y         | Z         |
| 1      | 6    | 0    | 3.917726                         | -2.220143 | -1.551103 |

| 2             | 6    | 0    | 4.833627                         | −2.644657 | −0.592069 |
|---------------|------|------|----------------------------------|-----------|-----------|
| 3             | 6    | 0    | 5.075047                         | −1.887153 | 0.557448  |
| 4             | 6    | 0    | 4.362635                         | −0.691502 | 0.708449  |
| 5             | 6    | 0    | 3.438008                         | −0.238785 | −0.232753 |
| 6             | 6    | 0    | 3.214909                         | −1.021268 | −1.384791 |
| 7             | 7    | 0    | 4.399255                         | 0.238557  | 1.720392  |
| 8             | 6    | 0    | 3.523957                         | 1.257978  | 1.45855   |
| 9             | 6    | 0    | 2.902219                         | 0.99799   | 0.252536  |
| 10            | 6    | 0    | 1.863189                         | 1.853009  | −0.411707 |
| 11            | 6    | 0    | 0.442502                         | 1.568145  | 0.095662  |
| 12            | 6    | 0    | −0.539098                        | 2.589746  | −0.486163 |
| 13            | 7    | 0    | −0.002765                        | 0.2138    | −0.215156 |
| 14            | 7    | 0    | −1.858594                        | 2.206456  | −0.481969 |
| 15            | 8    | 0    | −0.235504                        | 3.741634  | −0.788547 |
| 16            | 6    | 0    | −2.325852                        | 0.934322  | −0.188452 |
| 17            | 6    | 0    | −1.29988                         | −0.154942 | 0.049564  |
| 18            | 8    | 0    | −1.537512                        | −1.297713 | 0.412787  |
| 19            | 6    | 0    | −3.658898                        | 0.746147  | −0.150598 |
| 20            | 6    | 0    | −4.442911                        | −0.417649 | 0.058324  |
| 21            | 7    | 0    | −5.656704                        | −0.289961 | 0.685867  |
| 22            | 6    | 0    | −6.162274                        | −1.50259  | 0.706621  |
| 23            | 7    | 0    | −5.338781                        | −2.397996 | 0.0852    |
| 24            | 6    | 0    | −4.249975                        | −1.706801 | −0.371264 |
| 25            | 1    | 0    | 3.745621                         | −2.823987 | −2.438726 |
| 26            | 1    | 0    | 5.370628                         | −3.579041 | −0.739223 |
| 27            | 1    | 0    | 5.790608                         | −2.220383 | 1.301972  |
| 28            | 1    | 0    | 2.504087                         | −0.702187 | −2.141619 |
| 29            | 1    | 0    | 4.990558                         | 0.171915  | 2.537264  |
| 30            | 1    | 0    | 3.420595                         | 2.08296   | 2.151398  |
| 31            | 1    | 0    | 1.908032                         | 1.709853  | −1.499135 |
| 32            | 1    | 0    | 2.122042                         | 2.905367  | −0.23537  |
| 33            | 1    | 0    | 0.399816                         | 1.6752    | 1.187946  |
| 34            | 1    | 0    | 0.636422                         | −0.530027 | 0.046794  |
| 35            | 1    | 0    | −2.512135                        | 2.930934  | −0.752881 |
| 36            | 1    | 0    | −4.282841                        | 1.629157  | −0.278561 |
| 37            | 1    | 0    | −7.107631                        | −1.789597 | 1.147059  |
| 38            | 1    | 0    | −5.510071                        | −3.387604 | −0.025902 |
| 39            | 1    | 0    | −3.458052                        | −2.191008 | −0.924782 |
| <b>11S-3b</b> |      |      | Standard Orientation (Ångstroms) |           |           |
| No.           | Atom | Type | X                                | Y         | Z         |
| 1             | 6    | 0    | 4.766074                         | −0.203404 | 2.250384  |
| 2             | 6    | 0    | 5.482                            | −1.304833 | 1.788316  |

| 3      | 6    | 0    | 5.293396                         | -1.793779 | 0.492599  |
|--------|------|------|----------------------------------|-----------|-----------|
| 4      | 6    | 0    | 4.359592                         | -1.138419 | -0.318849 |
| 5      | 6    | 0    | 3.623966                         | -0.035447 | 0.115048  |
| 6      | 6    | 0    | 3.836064                         | 0.440184  | 1.42565   |
| 7      | 7    | 0    | 3.980337                         | -1.394    | -1.61561  |
| 8      | 6    | 0    | 3.025999                         | -0.497764 | -2.015071 |
| 9      | 6    | 0    | 2.771603                         | 0.362906  | -0.964752 |
| 10     | 6    | 0    | 1.787833                         | 1.496165  | -0.95937  |
| 11     | 6    | 0    | 0.484524                         | 1.150301  | -0.225532 |
| 12     | 6    | 0    | -0.401567                        | 2.393229  | -0.107962 |
| 13     | 7    | 0    | -0.24917                         | 0.071313  | -0.878412 |
| 14     | 7    | 0    | -1.73591                         | 2.145894  | 0.107435  |
| 15     | 8    | 0    | 0.030244                         | 3.541594  | -0.035239 |
| 16     | 6    | 0    | -2.347467                        | 0.903702  | 0.027763  |
| 17     | 6    | 0    | -1.5048                          | -0.267556 | -0.435566 |
| 18     | 8    | 0    | -1.859168                        | -1.436968 | -0.475405 |
| 19     | 6    | 0    | -3.652374                        | 0.822551  | 0.350938  |
| 20     | 6    | 0    | -4.567376                        | -0.261359 | 0.322459  |
| 21     | 7    | 0    | -5.57274                         | -0.298616 | 1.25561   |
| 22     | 6    | 0    | -6.270587                        | -1.373868 | 0.966798  |
| 23     | 7    | 0    | -5.775874                        | -2.00883  | -0.136785 |
| 24     | 6    | 0    | -4.706473                        | -1.282319 | -0.584318 |
| 25     | 1    | 0    | 4.931105                         | 0.163022  | 3.260616  |
| 26     | 1    | 0    | 6.200868                         | -1.791179 | 2.443897  |
| 27     | 1    | 0    | 5.855402                         | -2.6503   | 0.135071  |
| 28     | 1    | 0    | 3.289352                         | 1.301429  | 1.797858  |
| 29     | 1    | 0    | 4.359197                         | -2.137153 | -2.186188 |
| 30     | 1    | 0    | 2.610417                         | -0.546811 | -3.013316 |
| 31     | 1    | 0    | 1.564378                         | 1.788741  | -1.994164 |
| 32     | 1    | 0    | 2.267168                         | 2.367259  | -0.494538 |
| 33     | 1    | 0    | 0.69684                          | 0.816945  | 0.798941  |
| 34     | 1    | 0    | 0.291607                         | -0.761428 | -1.084674 |
| 35     | 1    | 0    | -2.293195                        | 2.967459  | 0.307419  |
| 36     | 1    | 0    | -4.121455                        | 1.72969   | 0.728478  |
| 37     | 1    | 0    | -7.133283                        | -1.736364 | 1.509364  |
| 38     | 1    | 0    | -6.142026                        | -2.854186 | -0.551873 |
| 39     | 1    | 0    | -4.15393                         | -1.566222 | -1.4686   |
| 11S-3c |      |      | Standard Orientation (Ångstroms) |           |           |
| No.    | Atom | Type | X                                | Y         | Z         |
| 1      | 6    | 0    | 4.894565                         | -0.094998 | 2.209917  |
| 2      | 6    | 0    | 5.614294                         | -1.230159 | 1.775817  |
| 3      | 6    | 0    | 5.39816                          | -1.787357 | 0.51633   |

| 4      | 6    | 0    | 4.435593                         | -1.176294 | -0.298035 |
|--------|------|------|----------------------------------|-----------|-----------|
| 5      | 6    | 0    | 3.693108                         | -0.033843 | 0.116921  |
| 6      | 6    | 0    | 3.938164                         | 0.508147  | 1.395664  |
| 7      | 7    | 0    | 4.017575                         | -1.498692 | -1.57247  |
| 8      | 6    | 0    | 3.043134                         | -0.603166 | -1.965063 |
| 9      | 6    | 0    | 2.804813                         | 0.318915  | -0.963756 |
| 10     | 6    | 0    | 1.815299                         | 1.456768  | -0.994309 |
| 11     | 6    | 0    | 0.529462                         | 1.171391  | -0.204764 |
| 12     | 6    | 0    | -0.378715                        | 2.393601  | -0.126773 |
| 13     | 7    | 0    | -0.207117                        | 0.050306  | -0.798196 |
| 14     | 7    | 0    | -1.70952                         | 2.120278  | 0.034296  |
| 15     | 8    | 0    | 0.045915                         | 3.548698  | -0.173525 |
| 16     | 6    | 0    | -2.34532                         | 0.862326  | 0.001199  |
| 17     | 6    | 0    | -1.47923                         | -0.296752 | -0.390419 |
| 18     | 8    | 0    | -1.873019                        | -1.461885 | -0.433891 |
| 19     | 6    | 0    | -3.672055                        | 0.80327   | 0.303151  |
| 20     | 6    | 0    | -4.658825                        | -0.268733 | 0.317738  |
| 21     | 7    | 0    | -5.719633                        | -0.19496  | 1.21456   |
| 22     | 6    | 0    | -6.498939                        | -1.229658 | 0.9647    |
| 23     | 7    | 0    | -6.008907                        | -1.965703 | -0.074836 |
| 24     | 6    | 0    | -4.83653                         | -1.380645 | -0.489588 |
| 25     | 1    | 0    | 5.08768                          | 0.318934  | 3.195398  |
| 26     | 1    | 0    | 6.353941                         | -1.680795 | 2.431609  |
| 27     | 1    | 0    | 5.954629                         | -2.658214 | 0.183039  |
| 28     | 1    | 0    | 3.397699                         | 1.383981  | 1.744561  |
| 29     | 1    | 0    | 4.371959                         | -2.262681 | -2.128942 |
| 30     | 1    | 0    | 2.594349                         | -0.688294 | -2.944536 |
| 31     | 1    | 0    | 1.545593                         | 1.687207  | -2.031042 |
| 32     | 1    | 0    | 2.267628                         | 2.362507  | -0.580352 |
| 33     | 1    | 0    | 0.790964                         | 0.930911  | 0.837692  |
| 34     | 1    | 0    | 0.363411                         | -0.771378 | -0.981532 |
| 35     | 1    | 0    | -2.290665                        | 2.941936  | 0.159748  |
| 36     | 1    | 0    | -4.104817                        | 1.751945  | 0.623856  |
| 37     | 1    | 0    | -7.413091                        | -1.485974 | 1.481022  |
| 38     | 1    | 0    | -6.429152                        | -2.800623 | -0.46019  |
| 39     | 1    | 0    | -4.261947                        | -1.779428 | -1.306853 |
| 11S-3d |      |      | Standard Orientation (Ångstroms) |           |           |
| No.    | Atom | Type | X                                | Y         | Z         |
| 1      | 6    | 0    | 4.688689                         | -0.537331 | 2.237794  |
| 2      | 6    | 0    | 5.41206                          | -1.562572 | 1.634049  |
| 3      | 6    | 0    | 5.254424                         | -1.851293 | 0.275547  |
| 4      | 6    | 0    | 4.343646                         | -1.075414 | -0.451405 |



| 5      | 6    | 0    | 3.600991                         | −0.044423 | 0.124424  |
|--------|------|------|----------------------------------|-----------|-----------|
| 6      | 6    | 0    | 3.781756                         | 0.228698  | 1.496088  |
| 7      | 7    | 0    | 3.997224                         | −1.131009 | −1.780899 |
| 8      | 6    | 0    | 3.056151                         | −0.178588 | −2.065109 |
| 9      | 6    | 0    | 2.77757                          | 0.51683   | −0.904256 |
| 10     | 6    | 0    | 1.797032                         | 1.642934  | −0.754003 |
| 11     | 6    | 0    | 0.475656                         | 1.199264  | −0.11128  |
| 12     | 6    | 0    | −0.415647                        | 2.414081  | 0.161766  |
| 13     | 7    | 0    | −0.245673                        | 0.236696  | −0.933904 |
| 14     | 7    | 0    | −1.750365                        | 2.13261   | 0.333473  |
| 15     | 8    | 0    | 0.01085                          | 3.542439  | 0.396332  |
| 16     | 6    | 0    | −2.34871                         | 0.90375   | 0.095301  |
| 17     | 6    | 0    | −1.519808                        | −0.155312 | −0.605658 |
| 18     | 8    | 0    | −1.910869                        | −1.261666 | −0.949339 |
| 19     | 6    | 0    | −3.642995                        | 0.756717  | 0.437223  |
| 20     | 6    | 0    | −4.526831                        | −0.349038 | 0.343716  |
| 21     | 7    | 0    | −5.861555                        | −0.108092 | 0.13462   |
| 22     | 6    | 0    | −6.428605                        | −1.293284 | 0.128433  |
| 23     | 7    | 0    | −5.51767                         | −2.283825 | 0.362735  |
| 24     | 6    | 0    | −4.299565                        | −1.687771 | 0.543636  |
| 25     | 1    | 0    | 4.830353                         | −0.326314 | 3.294996  |
| 26     | 1    | 0    | 6.113297                         | −2.145949 | 2.226524  |
| 27     | 1    | 0    | 5.822868                         | −2.648226 | −0.192501 |
| 28     | 1    | 0    | 3.229632                         | 1.029401  | 1.979     |
| 29     | 1    | 0    | 4.388518                         | −1.782303 | −2.447451 |
| 30     | 1    | 0    | 2.666164                         | −0.074562 | −3.069497 |
| 31     | 1    | 0    | 1.600035                         | 2.087705  | −1.738803 |
| 32     | 1    | 0    | 2.266413                         | 2.432277  | −0.152835 |
| 33     | 1    | 0    | 0.660953                         | 0.716945  | 0.857409  |
| 34     | 1    | 0    | 0.293905                         | −0.536579 | −1.306595 |
| 35     | 1    | 0    | −2.313132                        | 2.912728  | 0.649976  |
| 36     | 1    | 0    | −4.143225                        | 1.631023  | 0.850702  |
| 37     | 1    | 0    | −7.478952                        | −1.494566 | −0.034194 |
| 38     | 1    | 0    | −5.712592                        | −3.274403 | 0.405872  |
| 39     | 1    | 0    | −3.412691                        | −2.261513 | 0.77168   |
| 11S-3e |      |      | Standard Orientation (Ångstroms) |           |           |
| No.    | Atom | Type | X                                | Y         | Z         |
| 1      | 6    | 0    | 2.521116                         | −3.000318 | −0.2813   |
| 2      | 6    | 0    | 3.868612                         | −3.191166 | 0.011564  |
| 3      | 6    | 0    | 4.73982                          | −2.104531 | 0.126027  |
| 4      | 6    | 0    | 4.207903                         | −0.822775 | −0.06092  |
| 5      | 6    | 0    | 2.862339                         | −0.597059 | −0.353883 |

|    |   |   |           |           |           |
|----|---|---|-----------|-----------|-----------|
| 6  | 6 | 0 | 2.006627  | -1.712053 | -0.468366 |
| 7  | 7 | 0 | 4.823667  | 0.405115  | -0.010215 |
| 8  | 6 | 0 | 3.915228  | 1.400256  | -0.249193 |
| 9  | 6 | 0 | 2.680314  | 0.819431  | -0.466306 |
| 10 | 6 | 0 | 1.40369   | 1.549918  | -0.760317 |
| 11 | 6 | 0 | 0.656682  | 1.965387  | 0.517613  |
| 12 | 6 | 0 | -0.419969 | 2.982988  | 0.148932  |
| 13 | 7 | 0 | 0.06679   | 0.833102  | 1.224321  |
| 14 | 7 | 0 | -1.66373  | 2.4721    | -0.124179 |
| 15 | 8 | 0 | -0.175959 | 4.170154  | -0.058292 |
| 16 | 6 | 0 | -2.058961 | 1.160073  | 0.086285  |
| 17 | 6 | 0 | -1.075645 | 0.226805  | 0.763077  |
| 18 | 8 | 0 | -1.235346 | -0.971821 | 0.943362  |
| 19 | 6 | 0 | -3.294563 | 0.802692  | -0.312966 |
| 20 | 6 | 0 | -4.005972 | -0.419297 | -0.19825  |
| 21 | 7 | 0 | -4.882644 | -0.767558 | -1.194416 |
| 22 | 6 | 0 | -5.411576 | -1.905474 | -0.804558 |
| 23 | 7 | 0 | -4.936609 | -2.283956 | 0.419084  |
| 24 | 6 | 0 | -4.062843 | -1.317981 | 0.837592  |
| 25 | 1 | 0 | 1.857336  | -3.857379 | -0.365994 |
| 26 | 1 | 0 | 4.249284  | -4.200095 | 0.152211  |
| 27 | 1 | 0 | 5.790052  | -2.256689 | 0.351895  |
| 28 | 1 | 0 | 0.951907  | -1.585241 | -0.696916 |
| 29 | 1 | 0 | 5.807003  | 0.544601  | 0.176614  |
| 30 | 1 | 0 | 4.224866  | 2.437366  | -0.247737 |
| 31 | 1 | 0 | 0.764269  | 0.92955   | -1.401145 |
| 32 | 1 | 0 | 1.645923  | 2.441294  | -1.354744 |
| 33 | 1 | 0 | 1.334084  | 2.446615  | 1.233006  |
| 34 | 1 | 0 | 0.720959  | 0.163127  | 1.614453  |
| 35 | 1 | 0 | -2.331481 | 3.146664  | -0.477537 |
| 36 | 1 | 0 | -3.875813 | 1.554135  | -0.844706 |
| 37 | 1 | 0 | -6.135412 | -2.491445 | -1.354733 |
| 38 | 1 | 0 | -5.194364 | -3.119196 | 0.925979  |
| 39 | 1 | 0 | -3.567298 | -1.372973 | 1.796424  |

---

Figure S1. ITS rDNA sequence of *Penicillium* sp. ZZ1750

GAACCTGCGGAAGGATCATTACCGAGTGAGGGCCCTCTGGGTCCAACCTCCCACCCGTGT  
TTATTTTACCTTGTTGCTTCGGCGGGCCCGCCTTAAGTGGCCGCCGGGGGGCTTACGCCCC  
CGGGCCCGCGCCCGCCGAAGACACCCTCGAACTCTGTCTGAAGATTGTAGTCTGAGTGA  
AAATATAAATTATTTAAACTTTCAACAACGGATCTCTTGGTTCCGGCATCGATGAAGAAC  
GCAGCGAAATGCGATACGTAATGTGAATTGCAAATTCAGTGAATCATCGAGTCTTTGAAC  
GCACATTGCGCCCCCTGGTATTCCGGGGGGCATGCCTGTCCGAGCGTCATTTCTGCCCTCA  
AGCACGGCTTGTGTGTTGGGCCCCGTCCTCCGATCCCGGGGGACGGGCCCCGAAAGGCAG  
CGGCGGCACCGCGTCCGGTCCTCGAGCGTATGGGGCTTTGTCACCCGCTCTGTAGGCCCCG  
GCCGCGCTTGCCGATCAACCCAAATTTTATCCAGGTTGACCTCGGATCAGGTAGGGATA  
CCCGCTGAACTTAAGCATATC (563 bp).

Figure S2. Static culture state of strain *Penicillium* sp. ZZ1750 in GA liquid medium

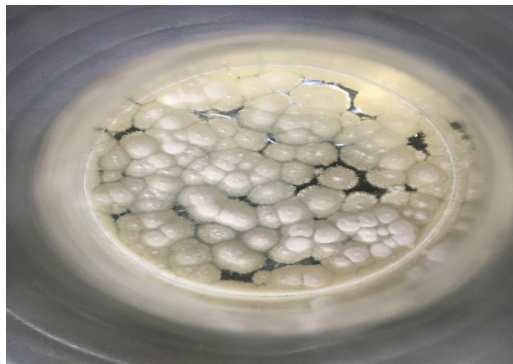

Figure S3.  $^1\text{H}$  NMR spectrum of penipyrindinone B (**1**, in  $\text{MeOH-}d_4$ )

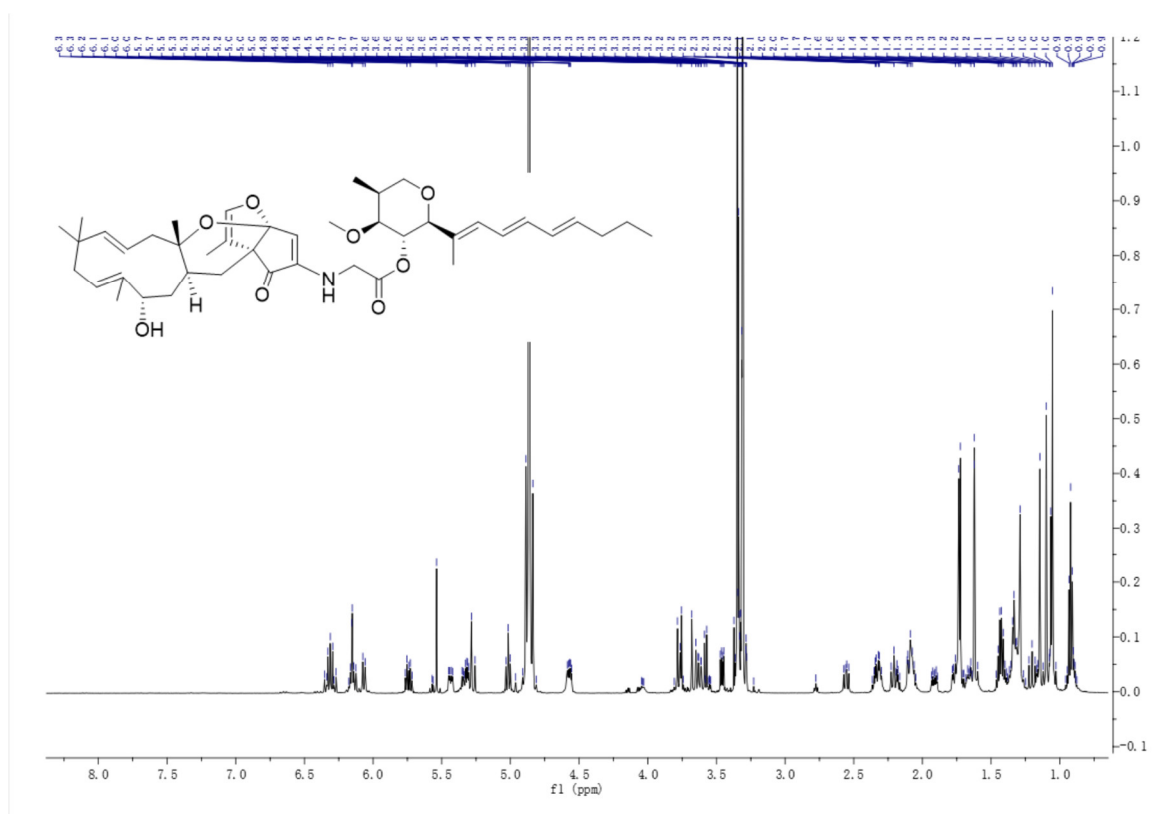

Figure S4.  $^1\text{H}$  NMR spectrum of penipyrindinone B (**1**, in  $\text{MeOH-}d_4$ )

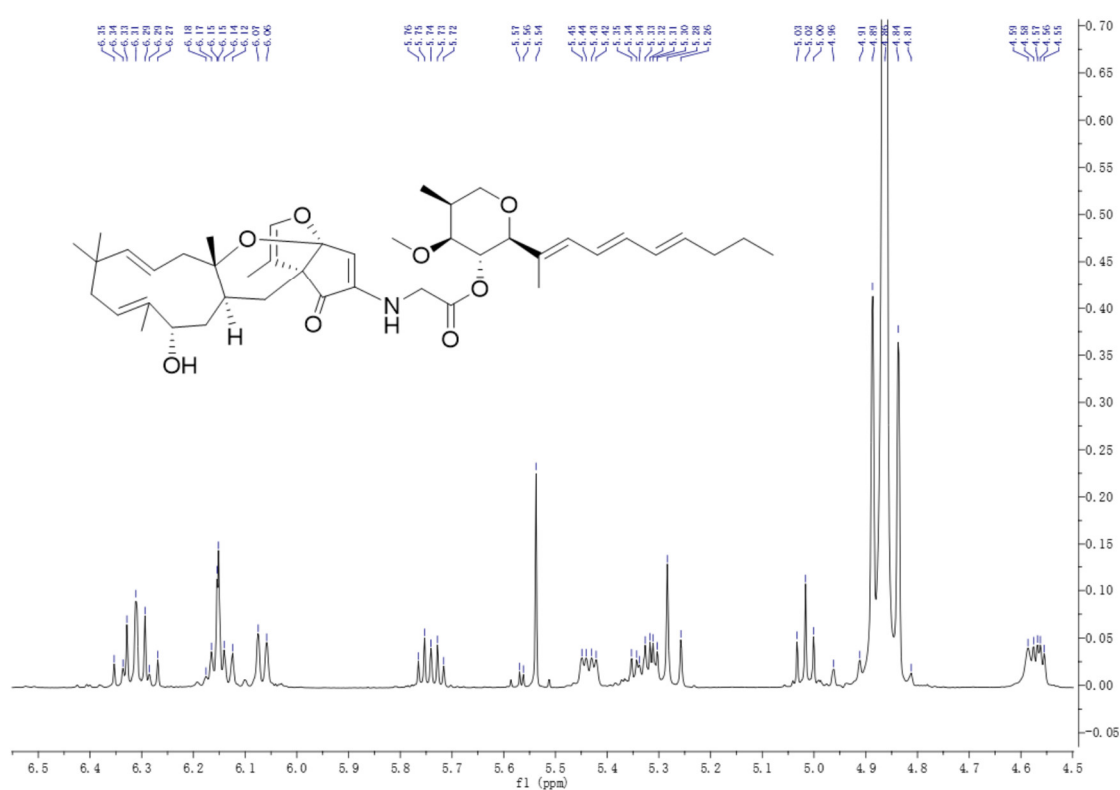

Figure S5.  $^1\text{H}$  NMR spectrum of penipyrindinone B (**1**, in  $\text{MeOH-}d_4$ )

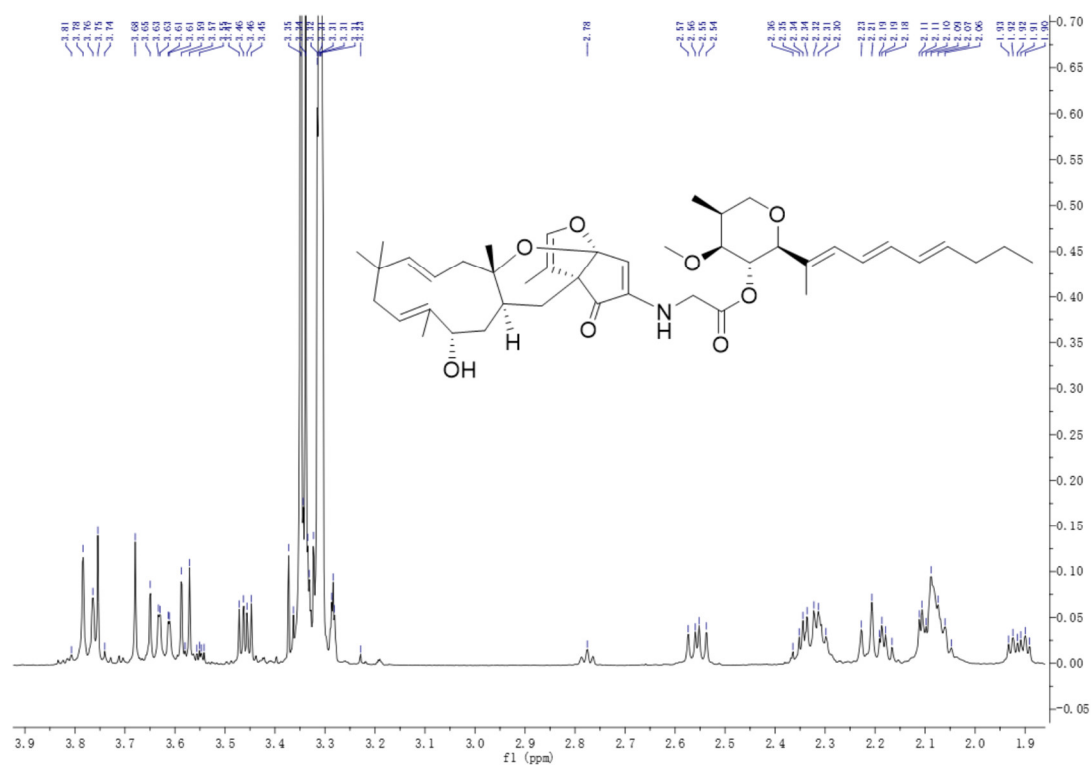

Figure S6.  $^1\text{H}$  NMR spectrum of penipyrindinone B (**1**, in  $\text{MeOH-}d_4$ )

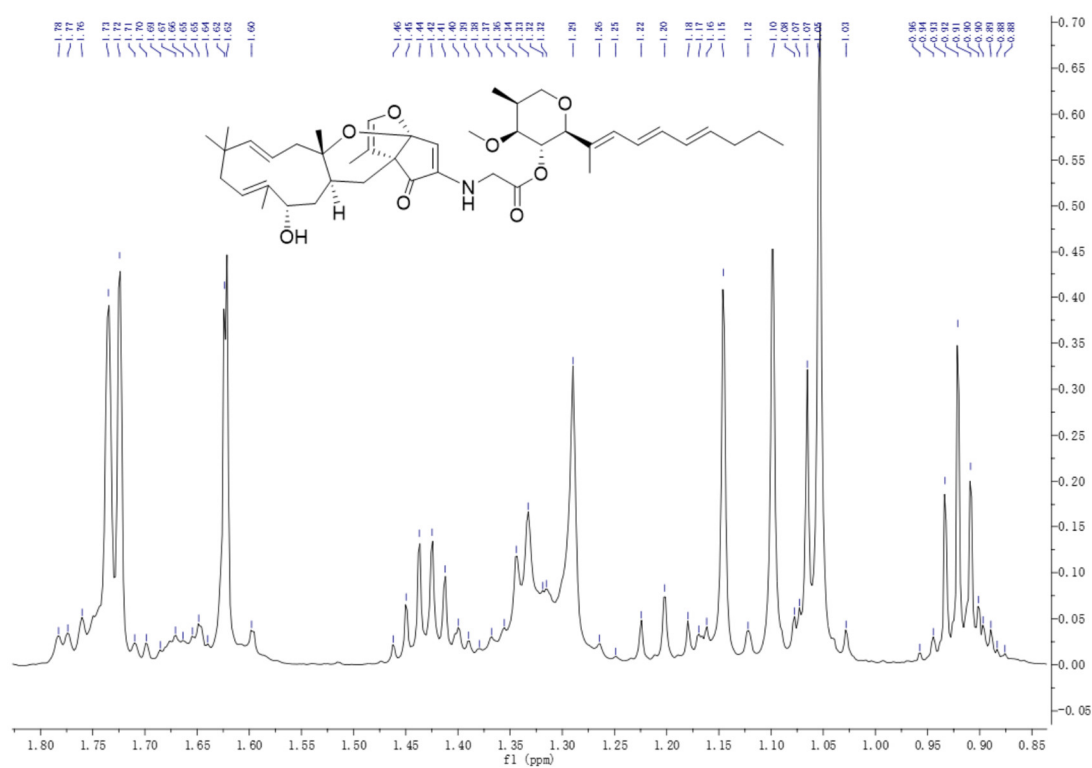

Figure S7.  $^{13}\text{C}$  NMR spectrum of penipyradinone B (**1**, in  $\text{MeOH-}d_4$ )

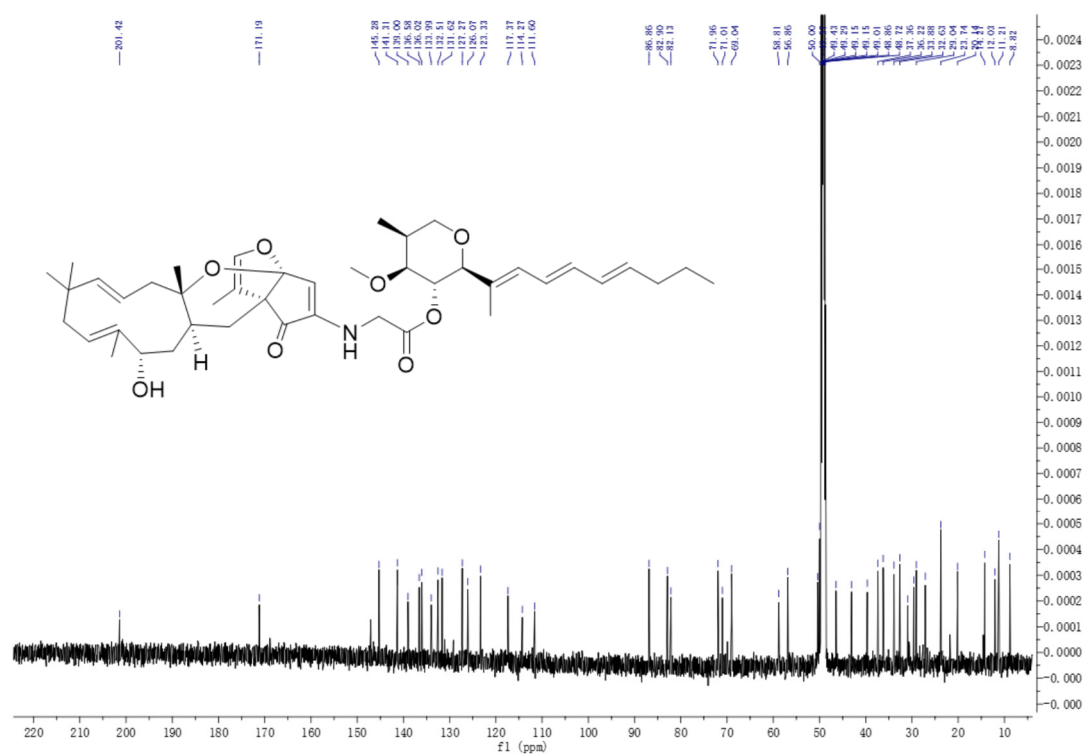

Figure S8.  $^{13}\text{C}$  NMR spectrum of penipyradinone B (**1**, in  $\text{MeOH-}d_4$ )

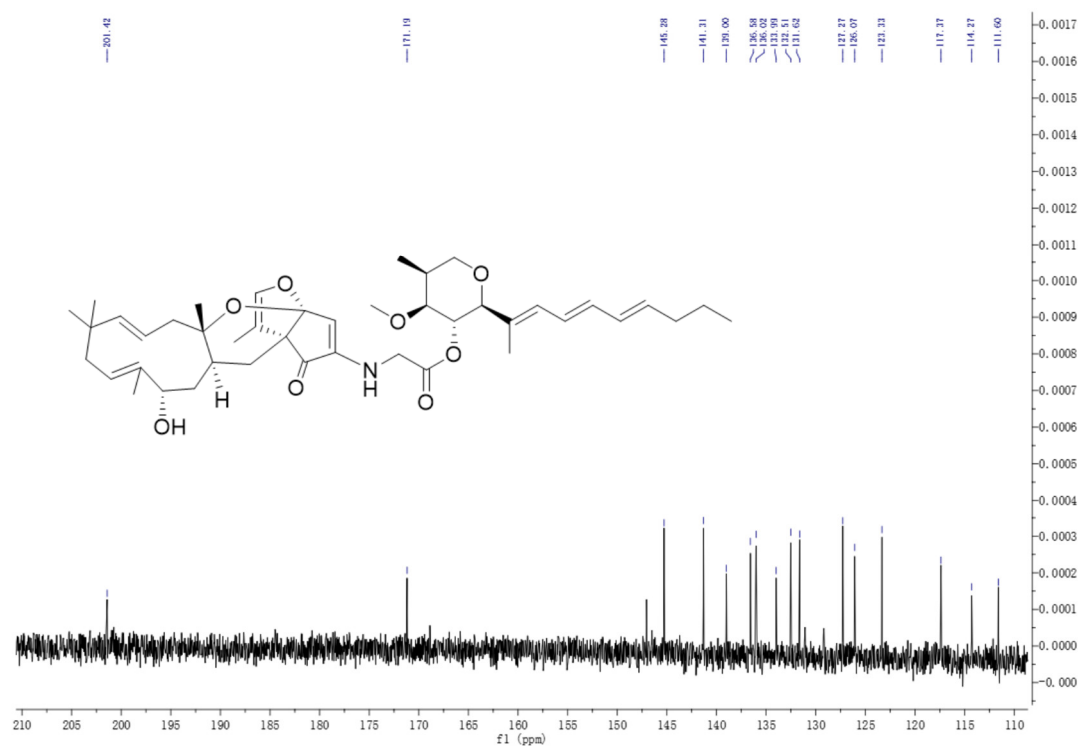

Figure S9.  $^{13}\text{C}$  NMR spectrum of penipyrindione B (**1**, in  $\text{MeOH-}d_4$ )

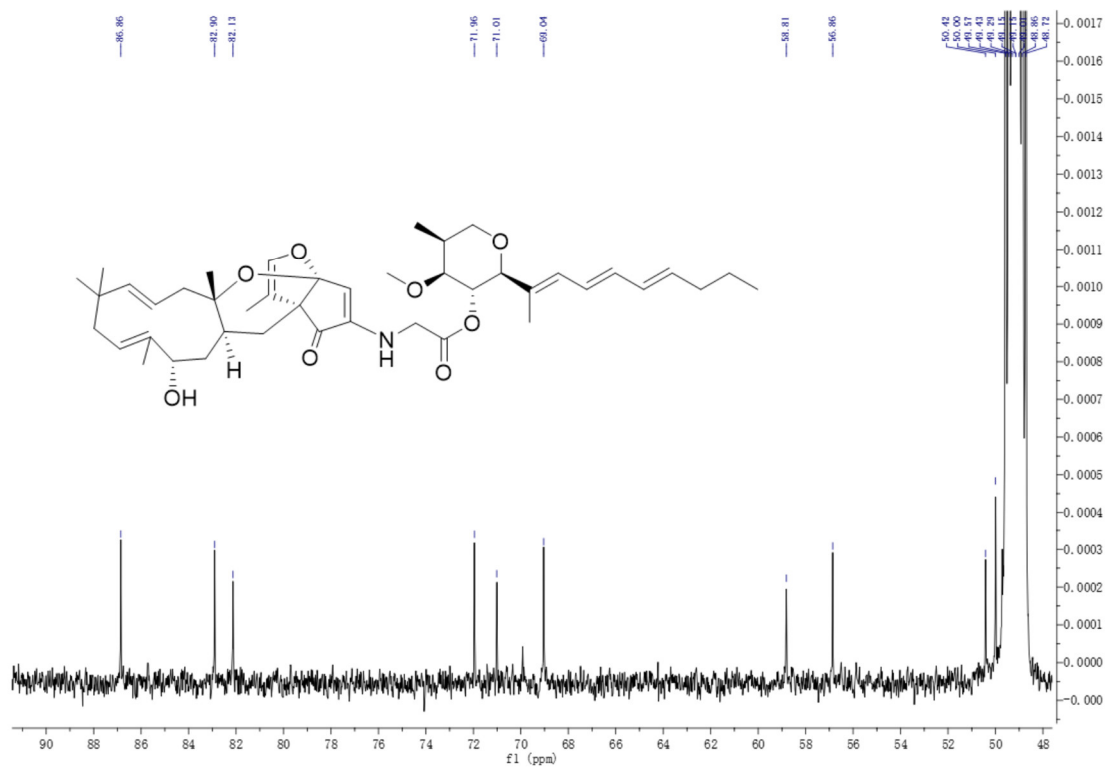

Figure S10.  $^{13}\text{C}$  NMR spectrum of penipyrindione B (**1**, in  $\text{MeOH-}d_4$ )

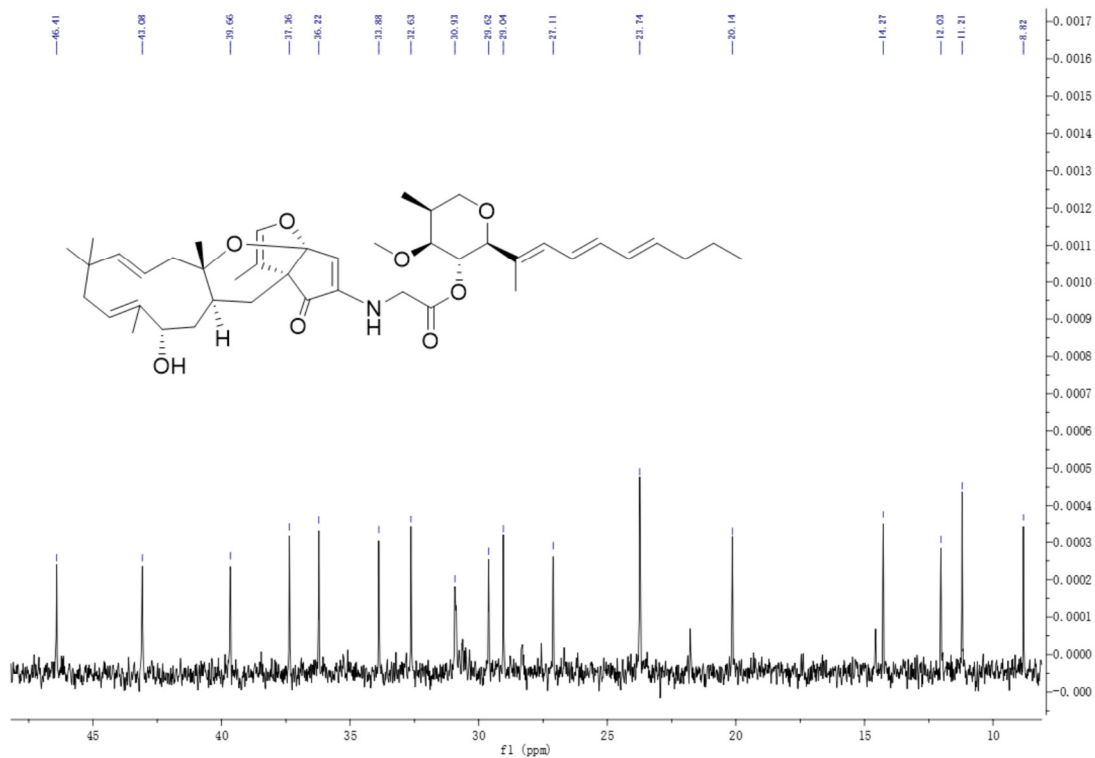

Figure S11. DEPT spectrum of penipyridinone B (**1**, in MeOH-*d*<sub>4</sub>)

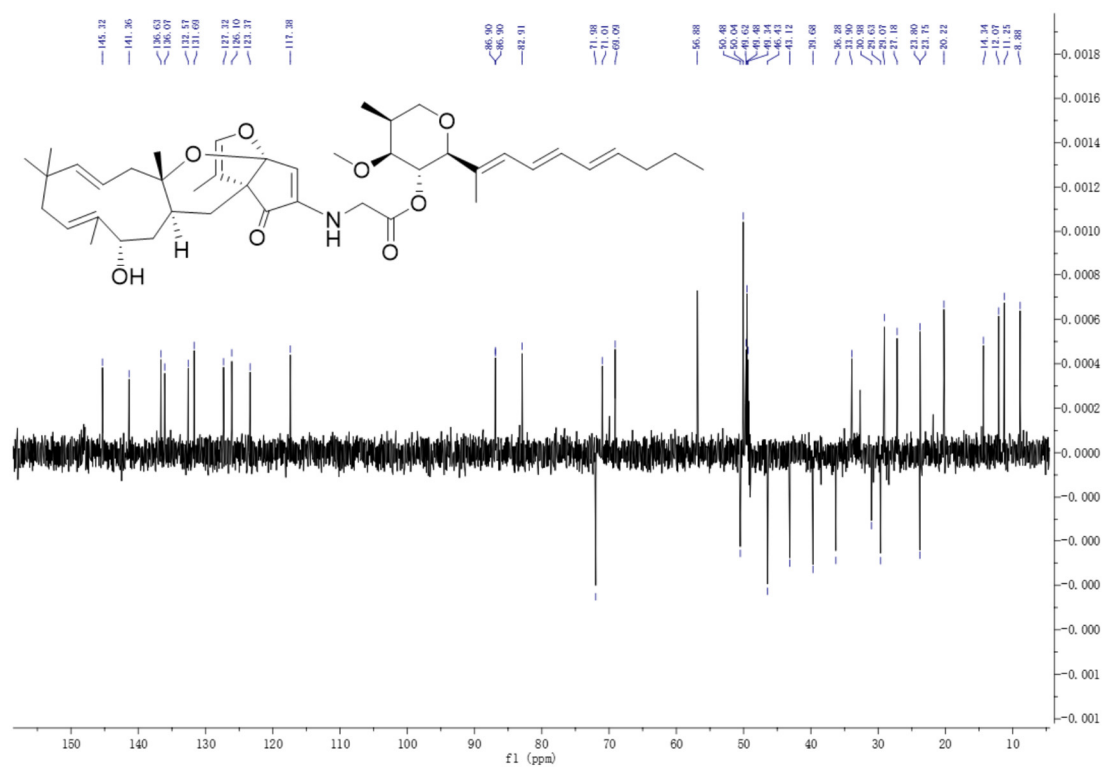

Figure S12. DEPT spectrum of penipyridinone B (**1**, in MeOH-*d*<sub>4</sub>)

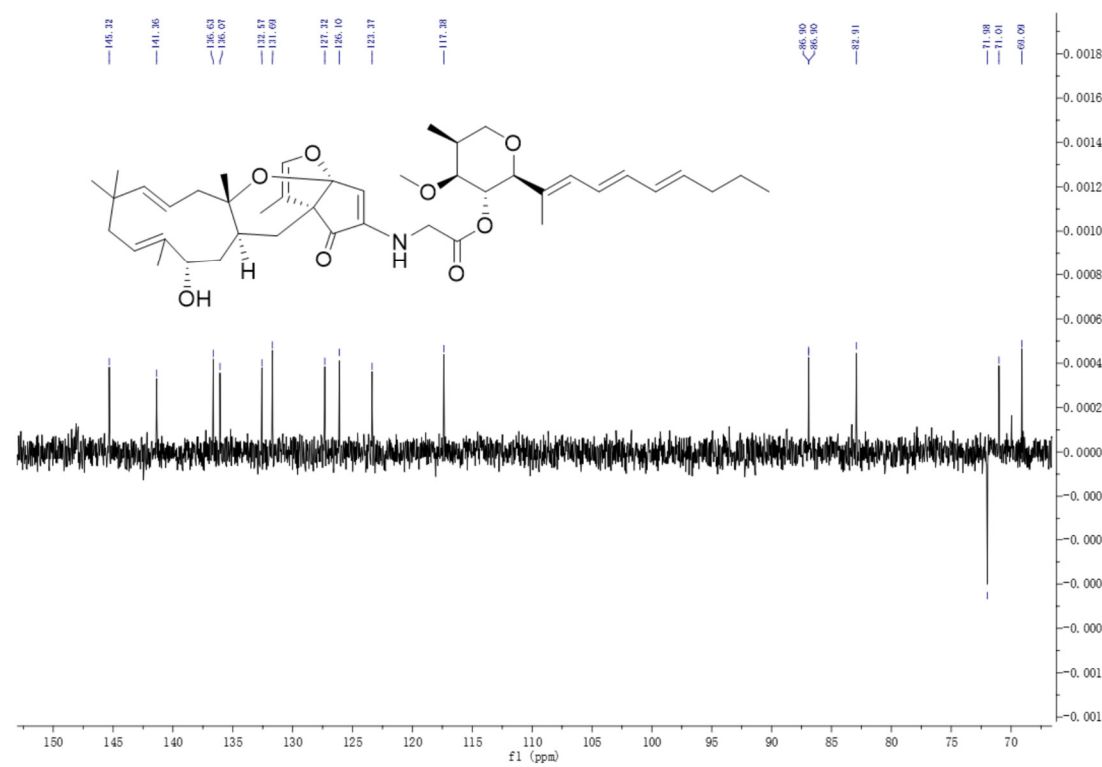



Figure S13. DEPT spectrum of penipyridinone B (**1**, in MeOH-*d*<sub>4</sub>)

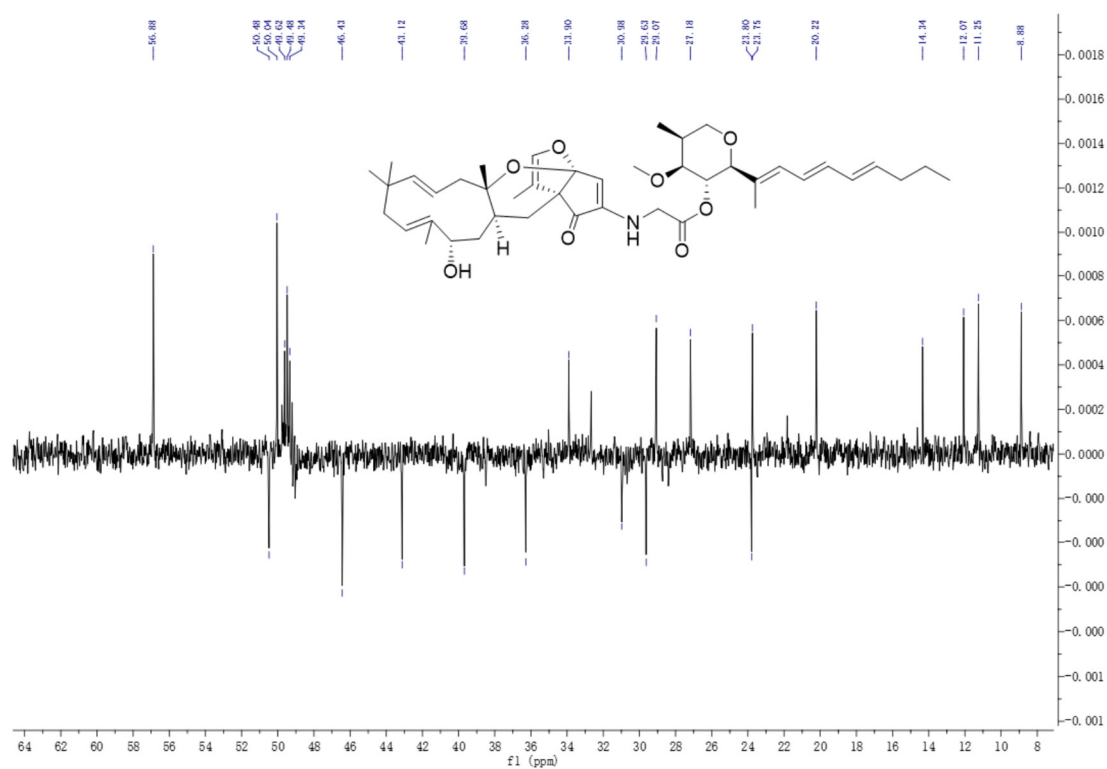

Figure S14. HMQC spectrum of penipyridinone B (**1**, in MeOH-*d*<sub>4</sub>)

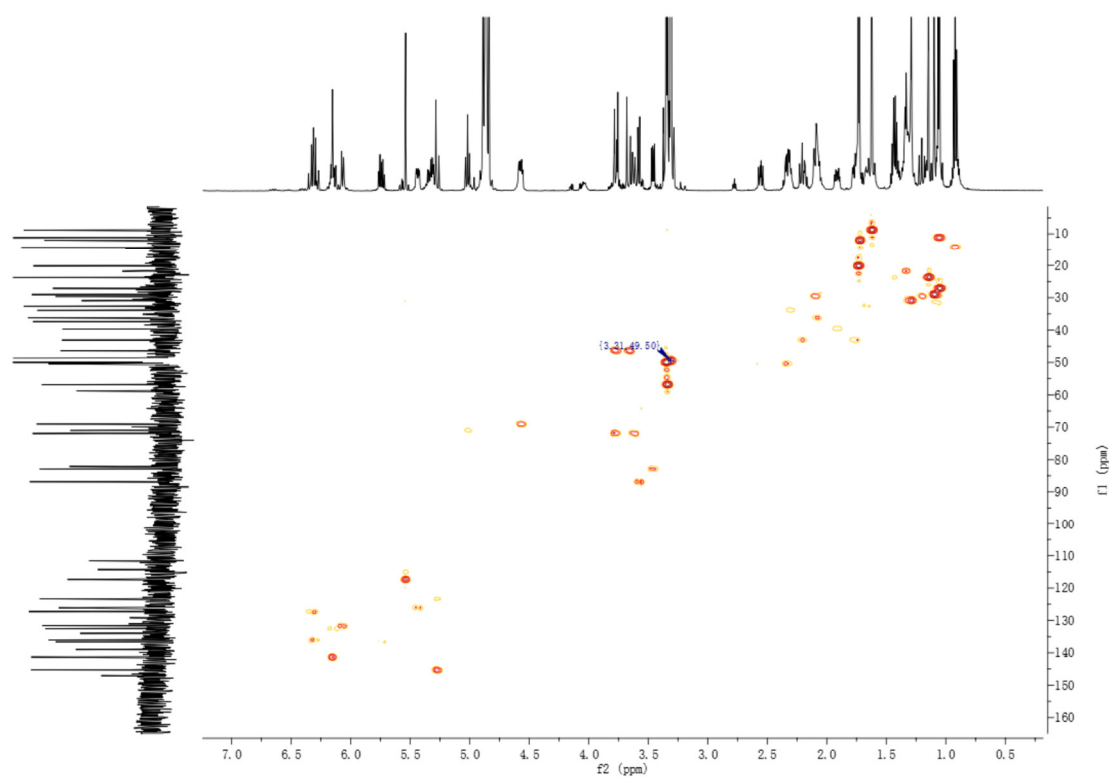

Figure S15. HMQC spectrum of penipyrindinone B (**1**, in MeOH-*d*<sub>4</sub>)

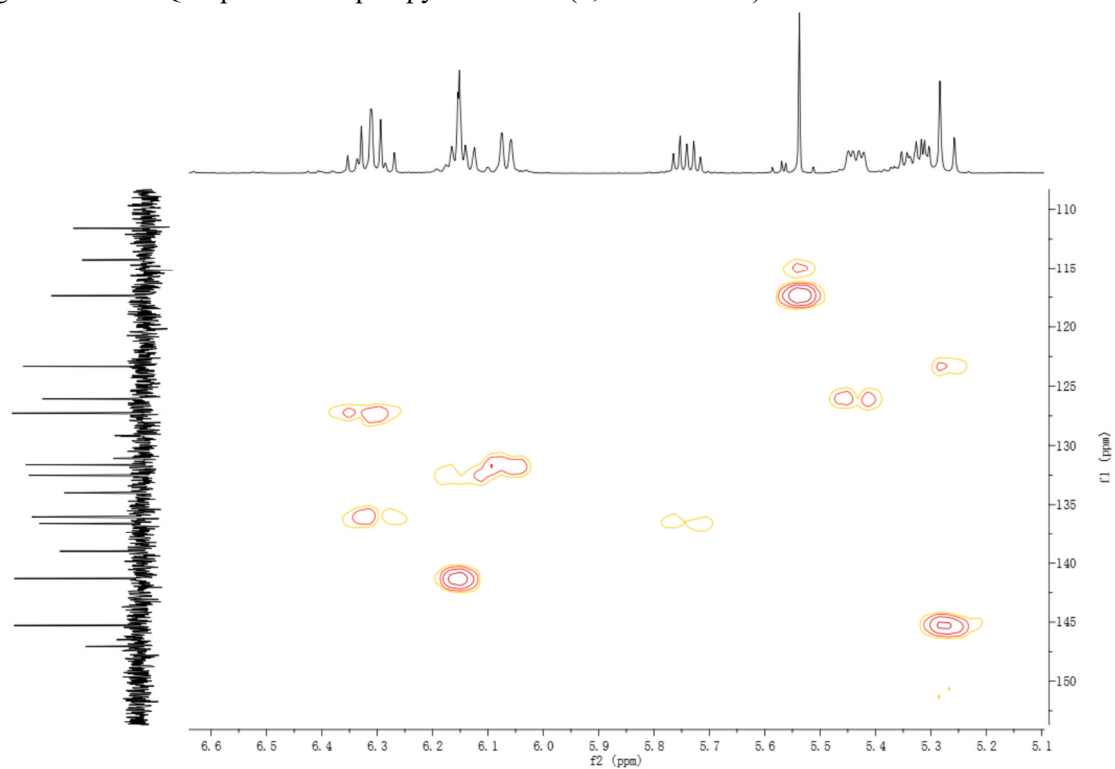

Figure S16. HMQC spectrum of penipyrindinone B (**1**, in MeOH-*d*<sub>4</sub>)

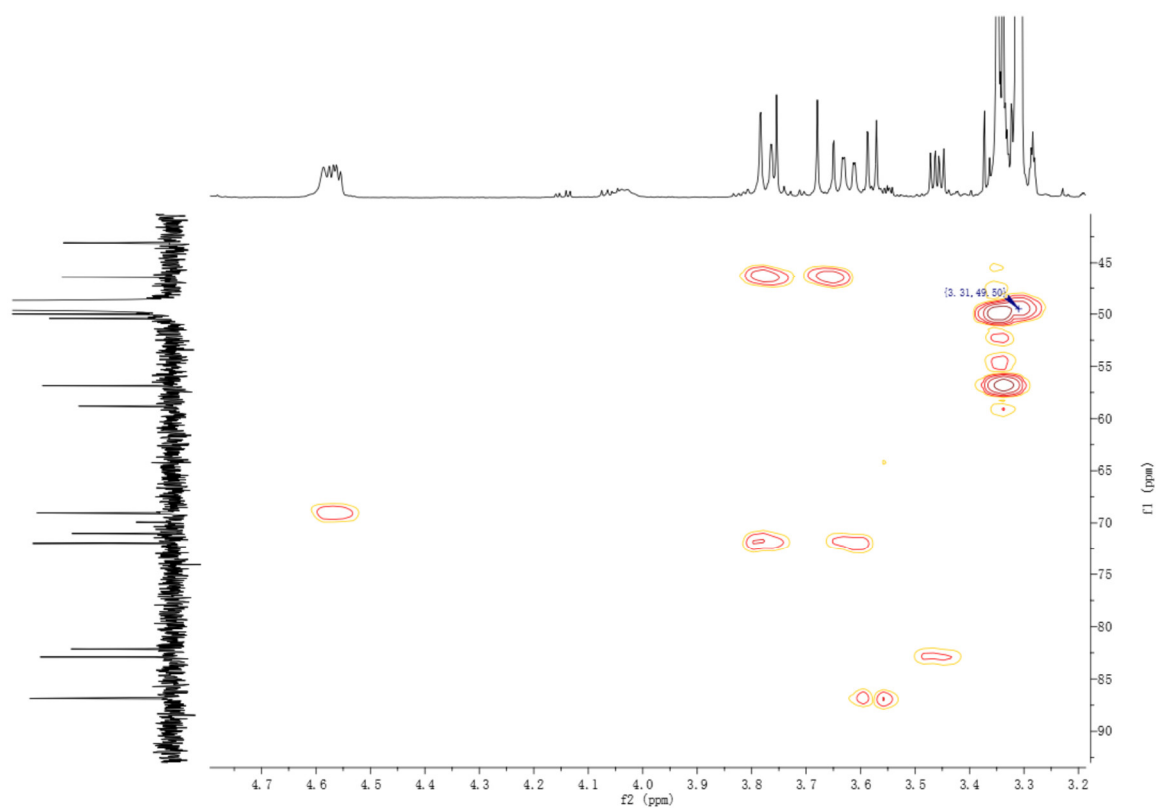

Figure S17. HMQC spectrum of penipyridinone B (**1**, in MeOH-*d*<sub>4</sub>)

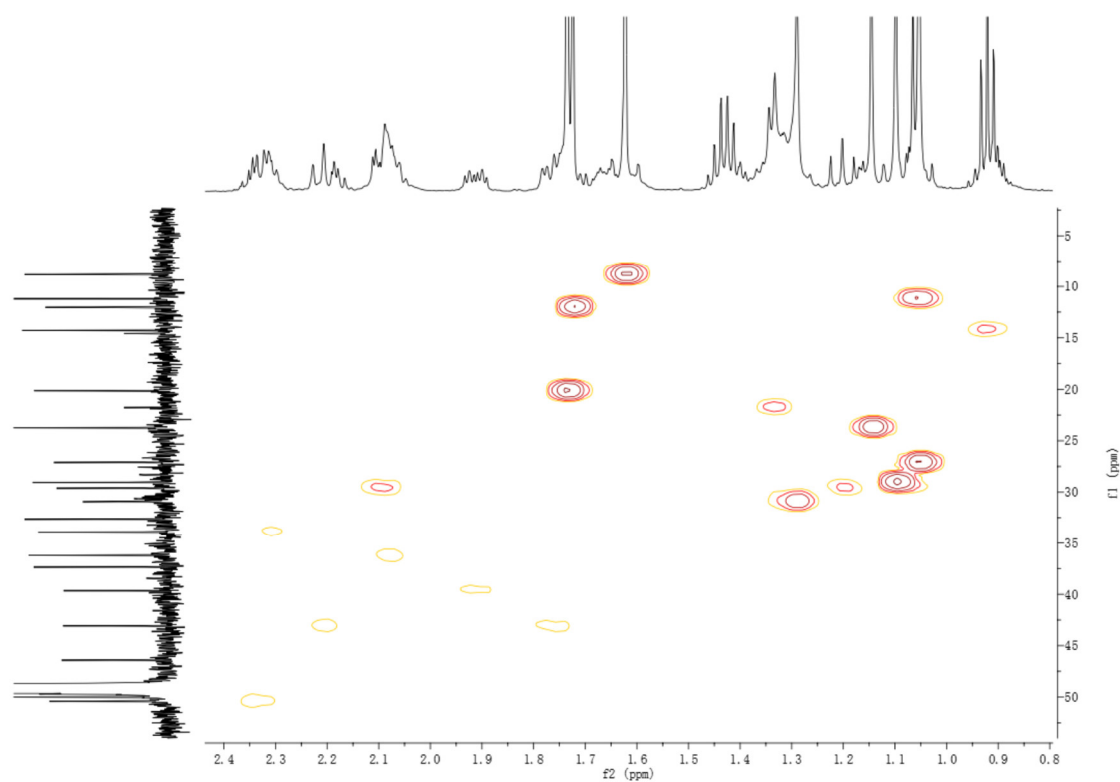

Figure S18. COSY spectrum of penipyridinone B (**1**, in MeOH-*d*<sub>4</sub>)

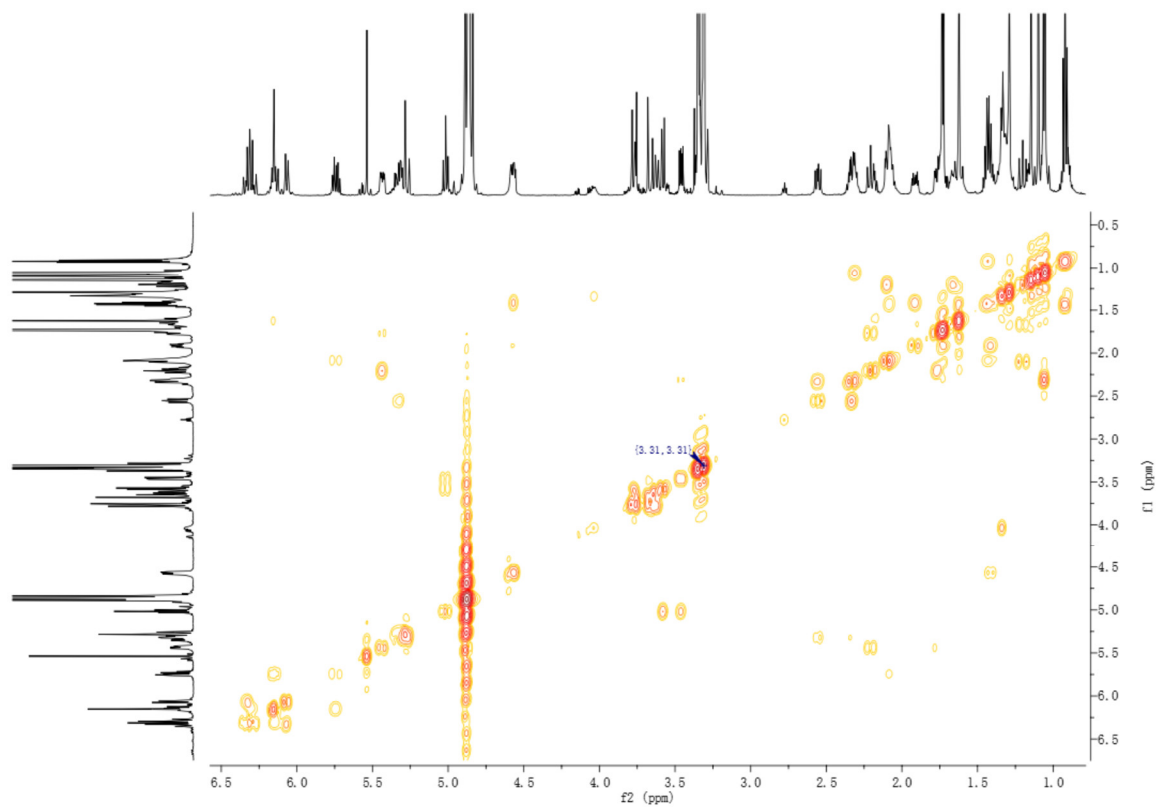

Figure S19. COSY spectrum of penipyradinone B (**1**, in MeOH-*d*<sub>4</sub>)

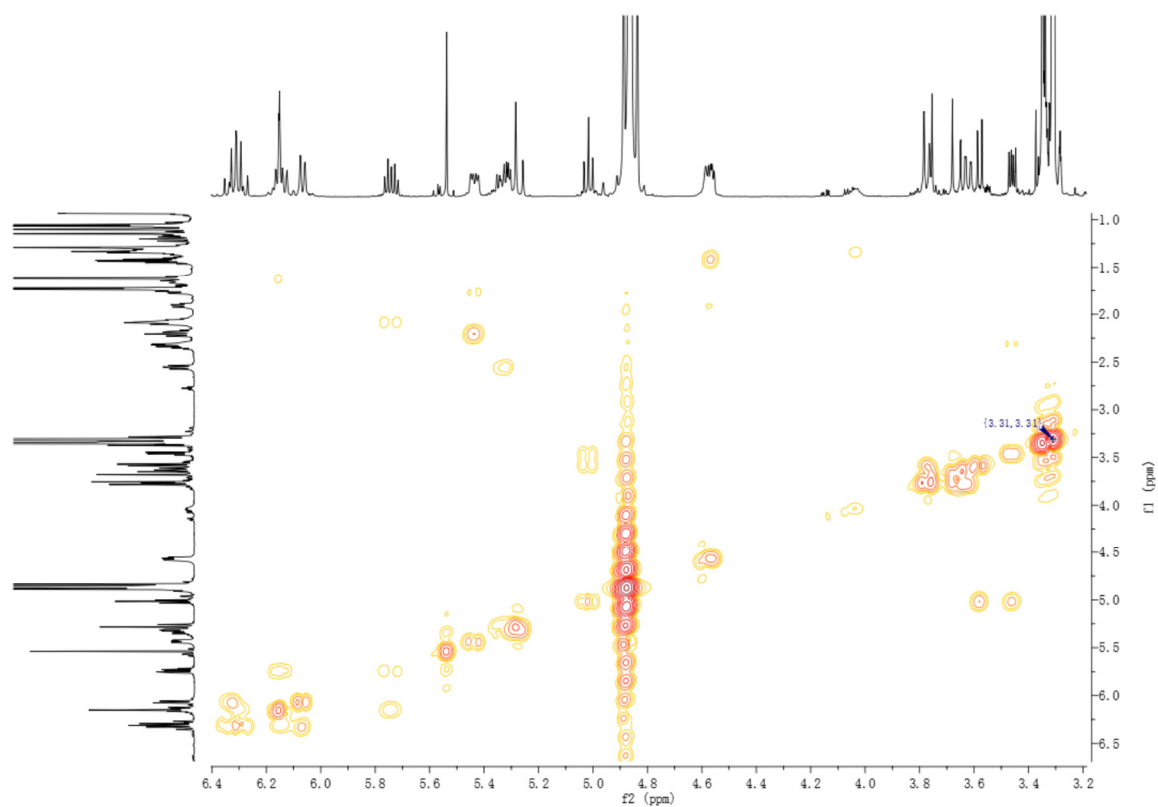

Figure S20. COSY spectrum of penipyradinone B (**1**, in MeOH-*d*<sub>4</sub>)

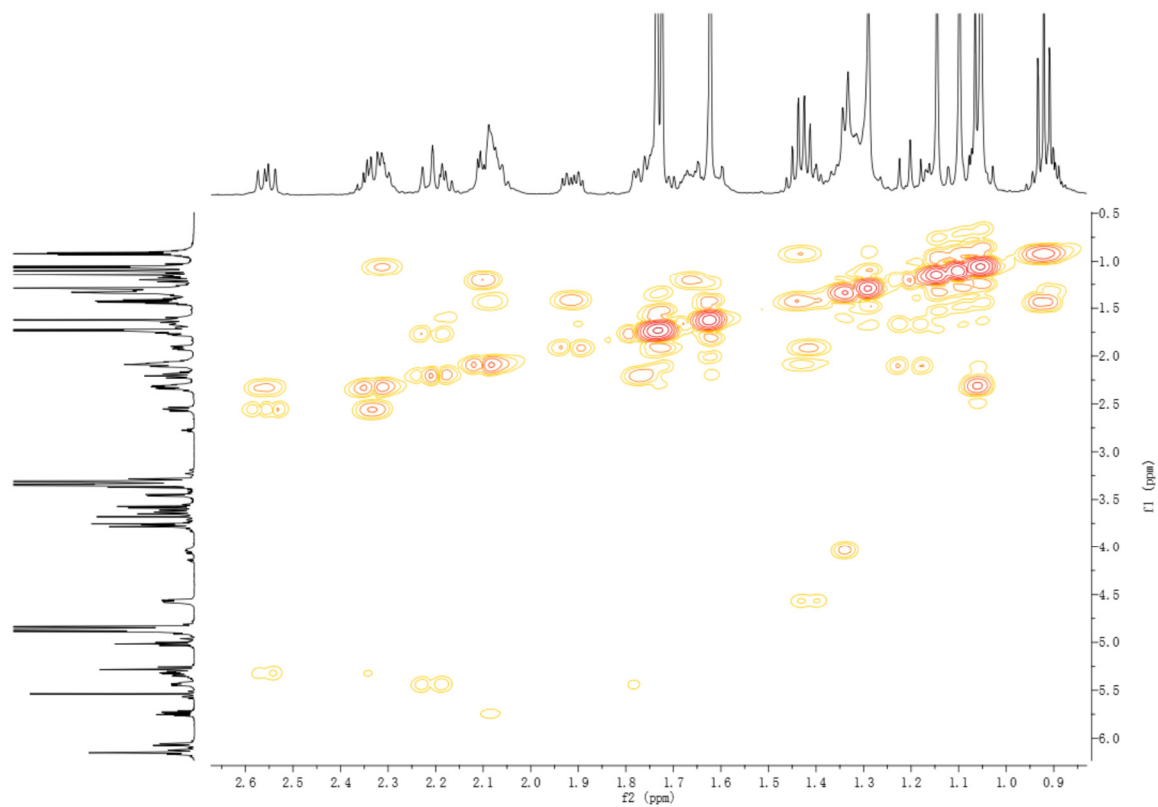

Figure S21. HMBC spectrum of penipyridinone B (**1**, in MeOH-*d*<sub>4</sub>)

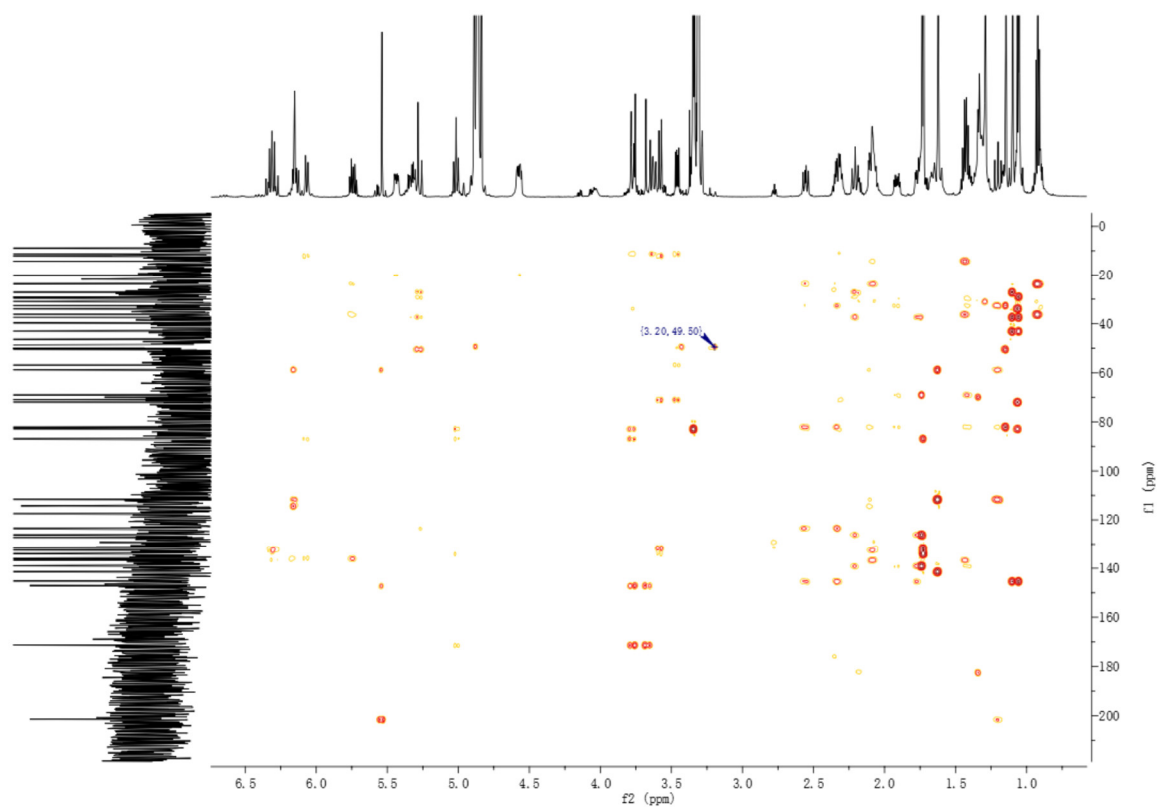

Figure S22. HMBC spectrum of penipyridinone B (**1**, in MeOH-*d*<sub>4</sub>)

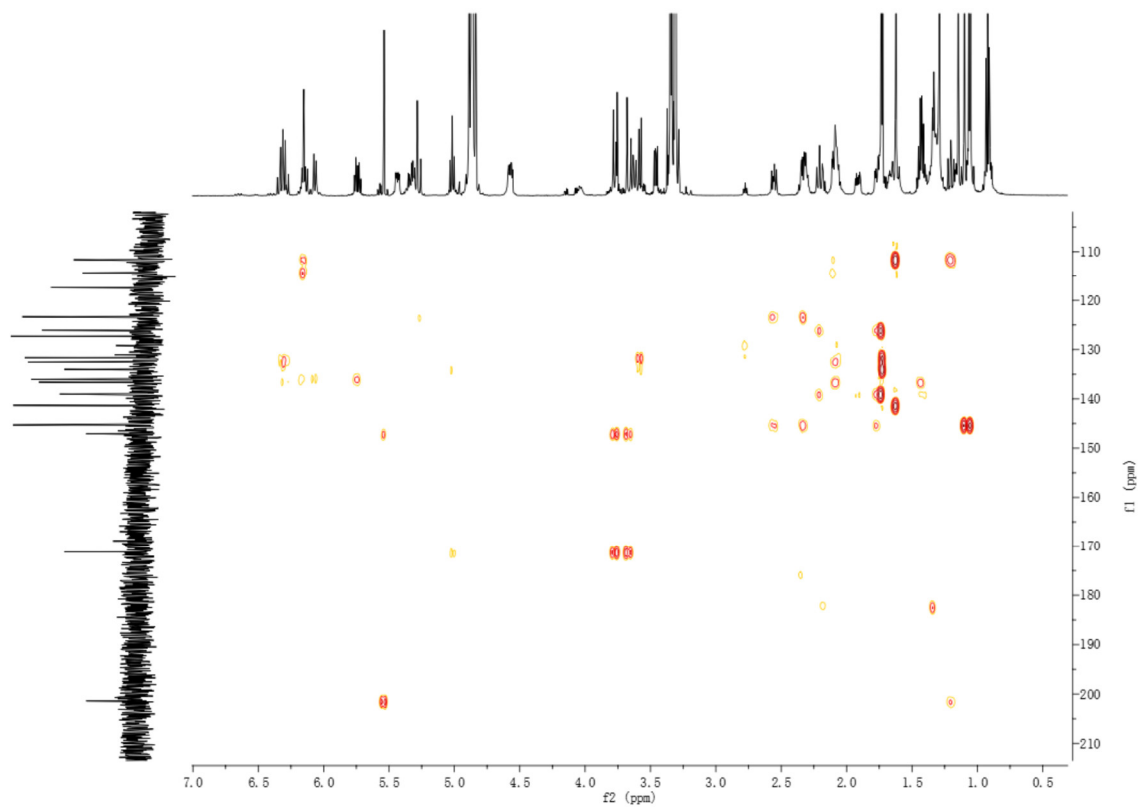

Figure S23. HMBC spectrum of penipyradinone B (**1**, in MeOH- $d_4$ )

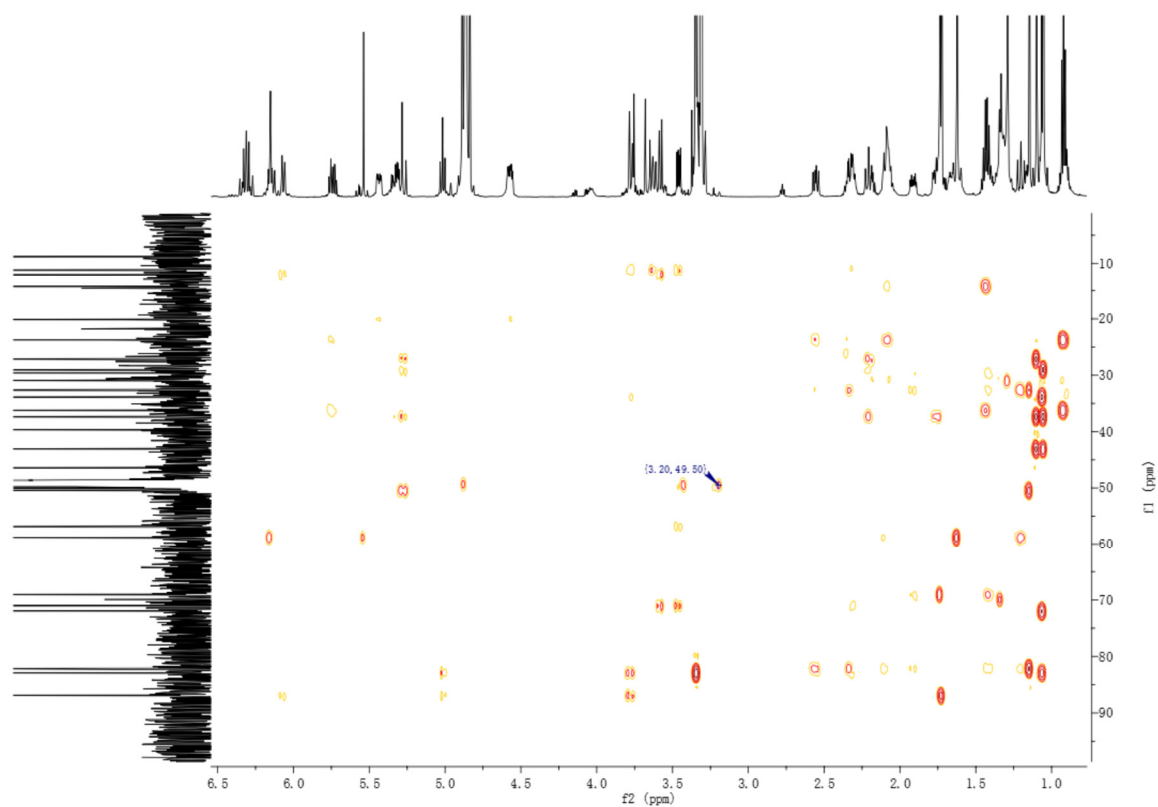

Figure S24. NOE spectrum of penipyradinone B (**1**, in MeOH- $d_4$ )

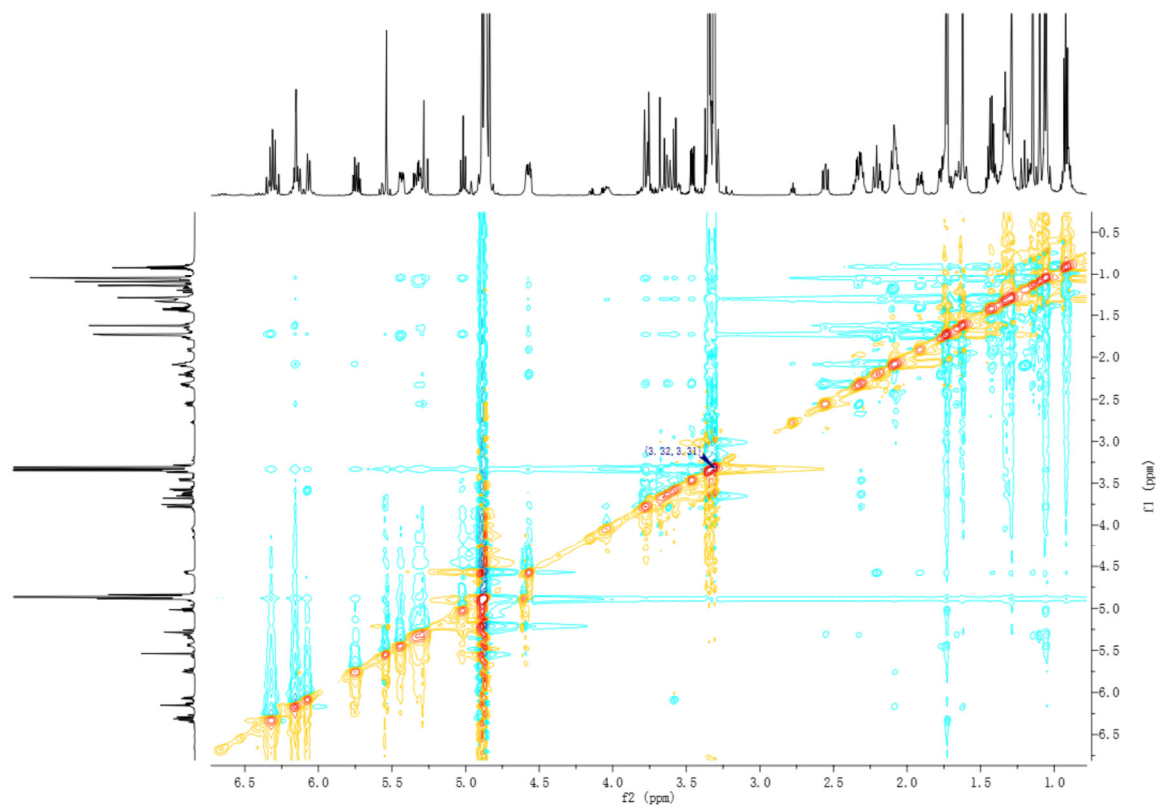

Figure S25.  $^1\text{H}$  NMR spectrum of penipyridinone B (**1**, in  $\text{DMSO}-d_6$ )

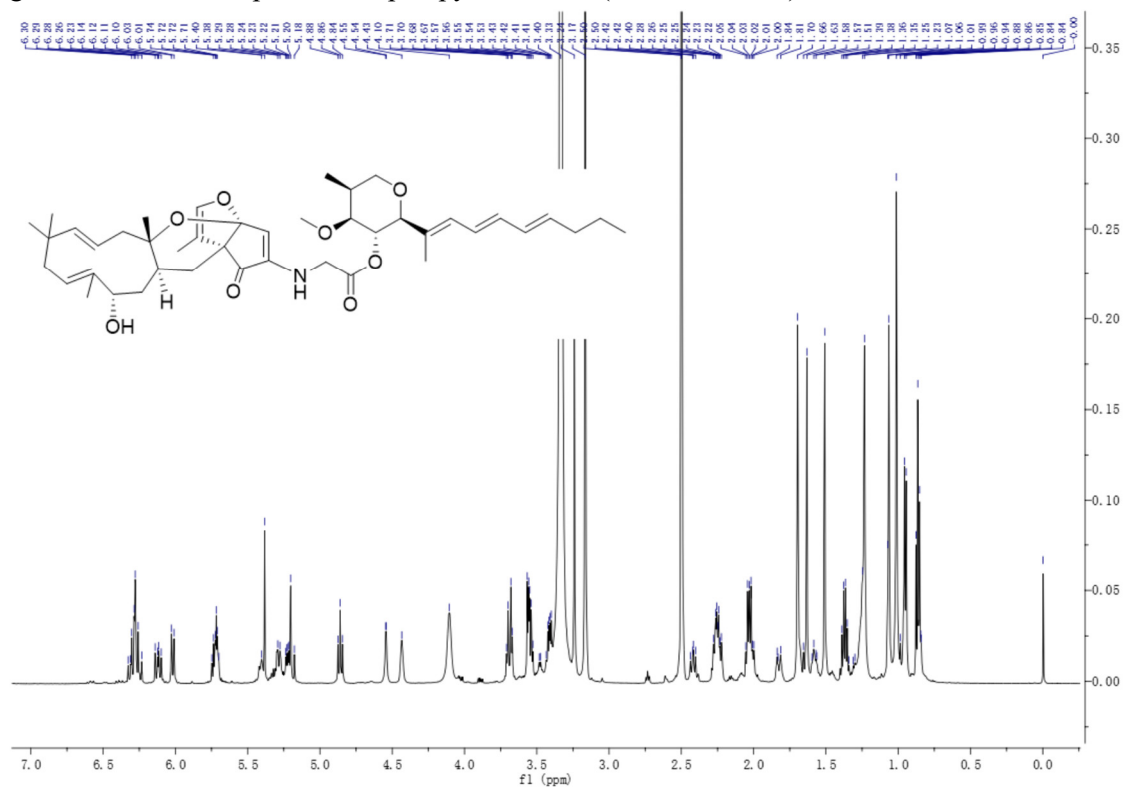

Figure S26.  $^1\text{H}$  NMR spectrum of penipyridinone B (**1**, in  $\text{DMSO}-d_6$ )

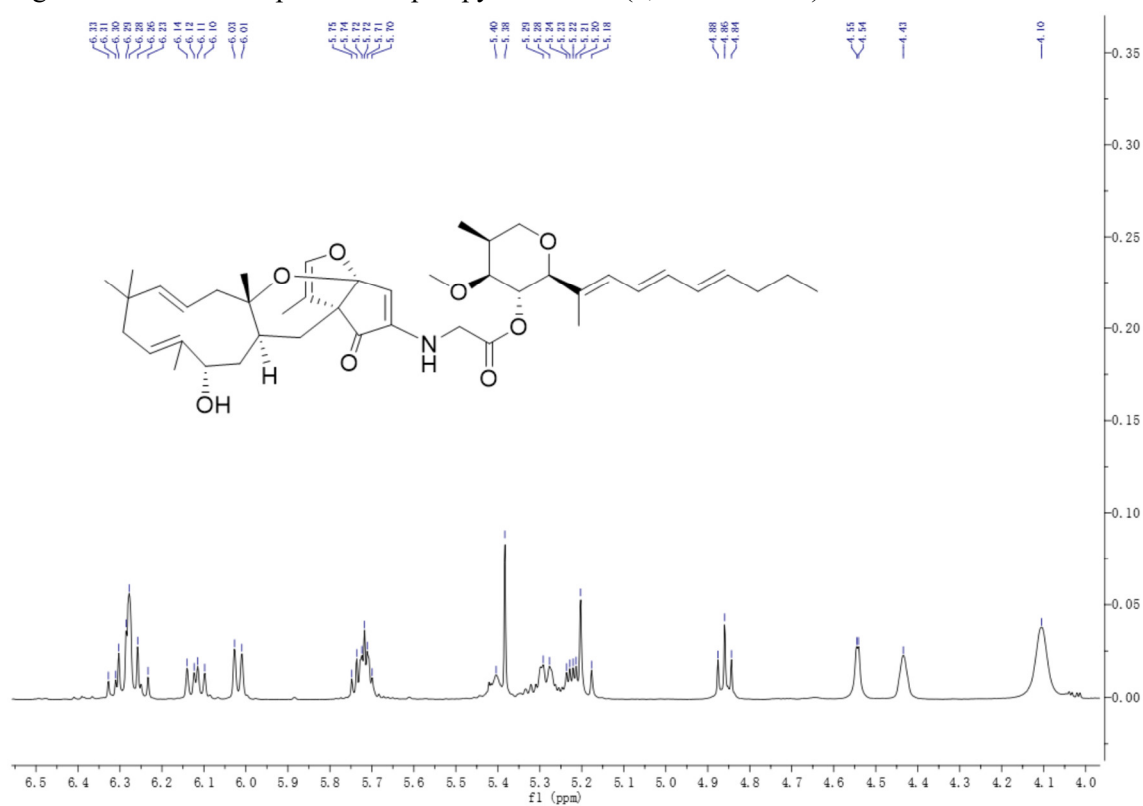

Figure S27.  $^1\text{H}$  NMR spectrum of penipyrindinone B (**1**, in  $\text{DMSO}-d_6$ )

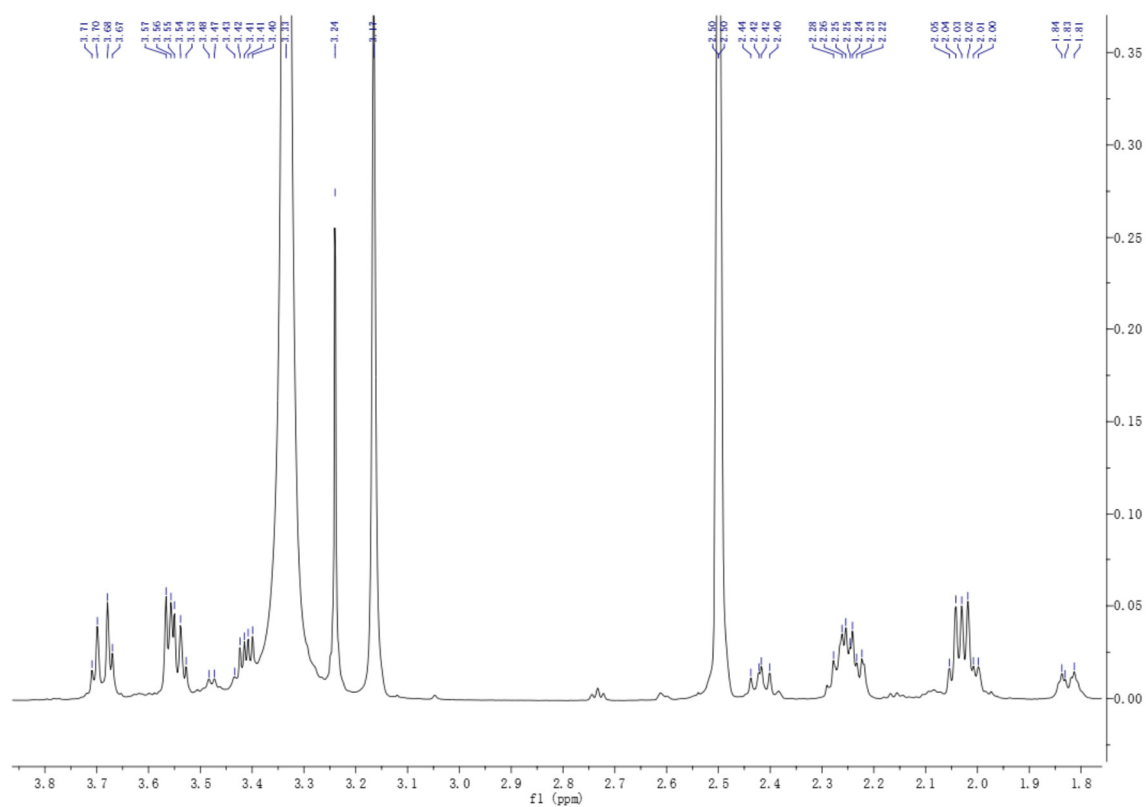

Figure S28.  $^1\text{H}$  NMR spectrum of penipyrindinone B (**1**, in  $\text{DMSO}-d_6$ )

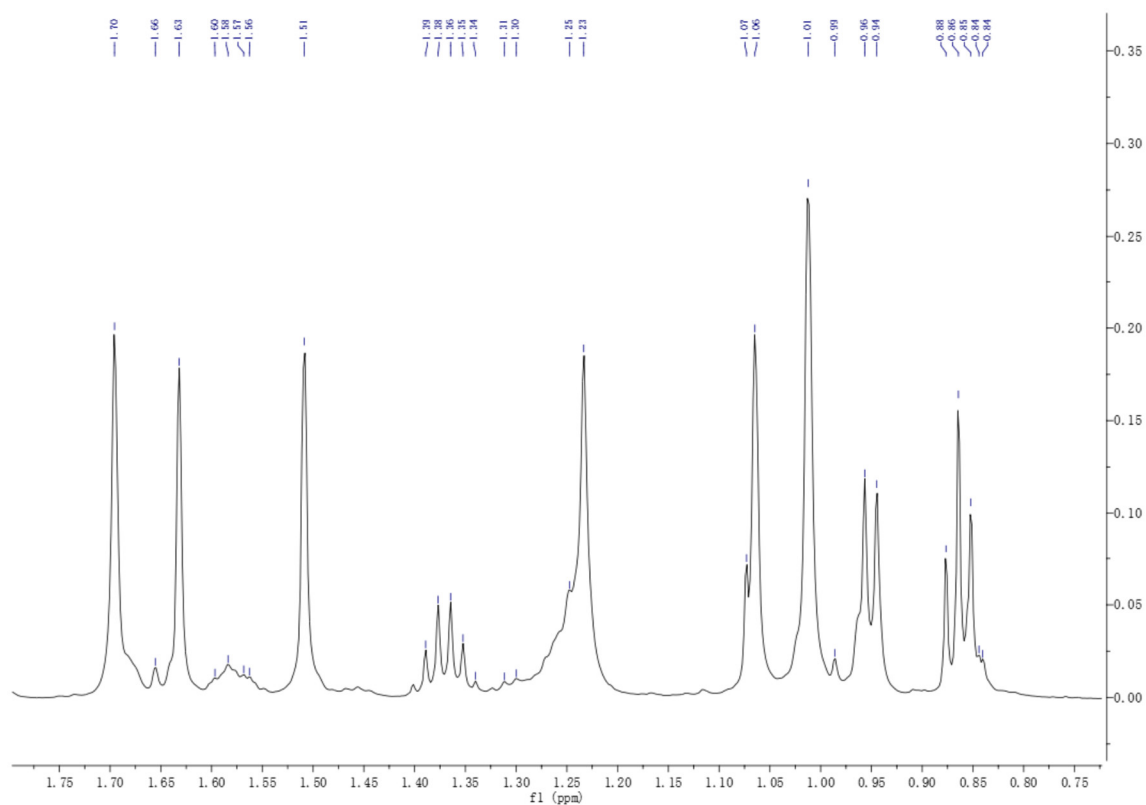



Figure S29.  $^{13}\text{C}$  NMR spectrum of penipyradinone B (**1**, in  $\text{DMSO-}d_6$ )

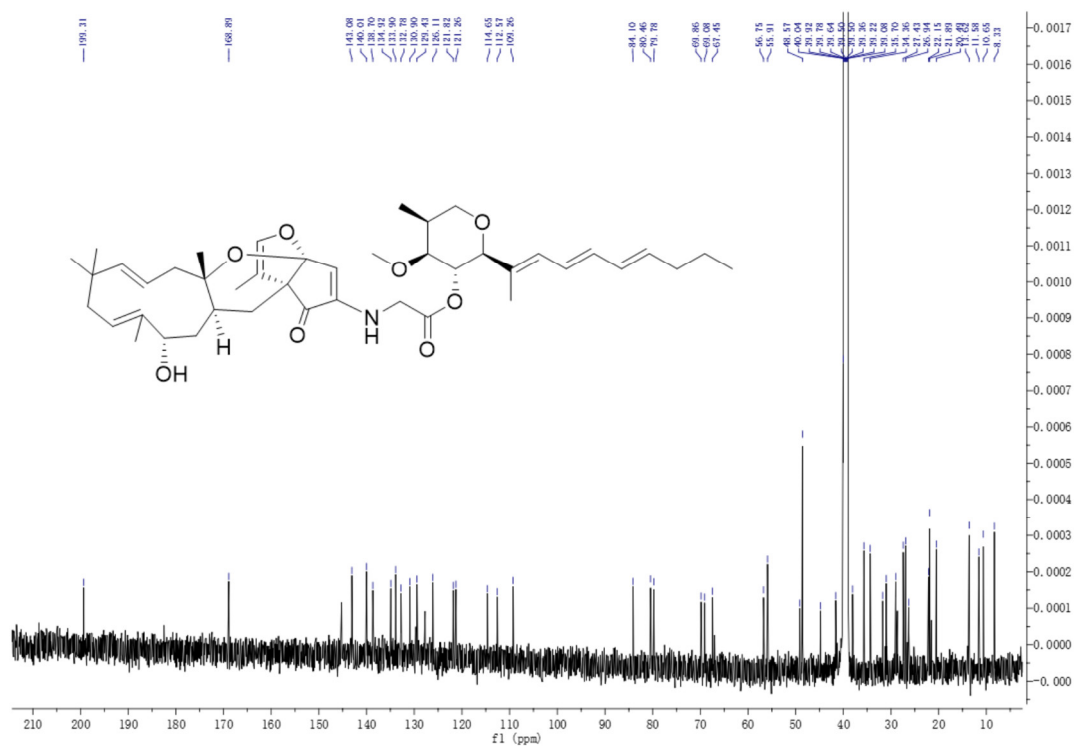

Figure S30.  $^{13}\text{C}$  NMR spectrum of penipyradinone B (**1**, in  $\text{DMSO-}d_6$ )

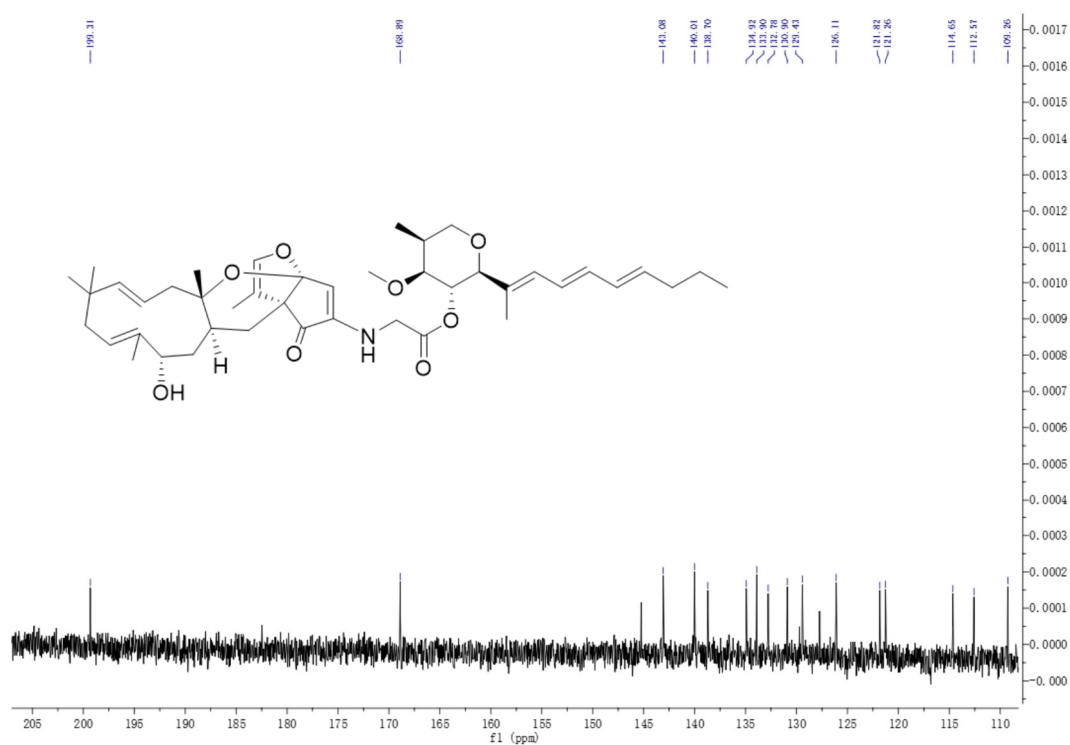

Figure S31.  $^{13}\text{C}$  NMR spectrum of penipyrudinone B (**1**, in  $\text{DMSO-}d_6$ )

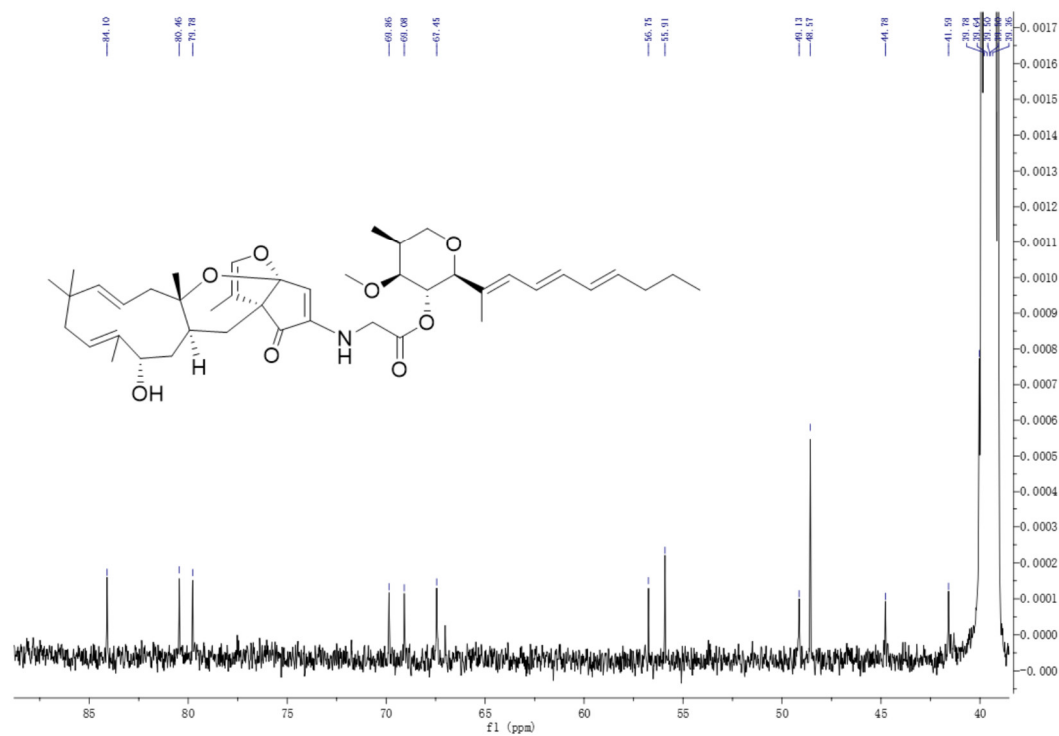

Figure S32.  $^{13}\text{C}$  NMR spectrum of penipyrudinone B (**1**, in  $\text{DMSO-}d_6$ )

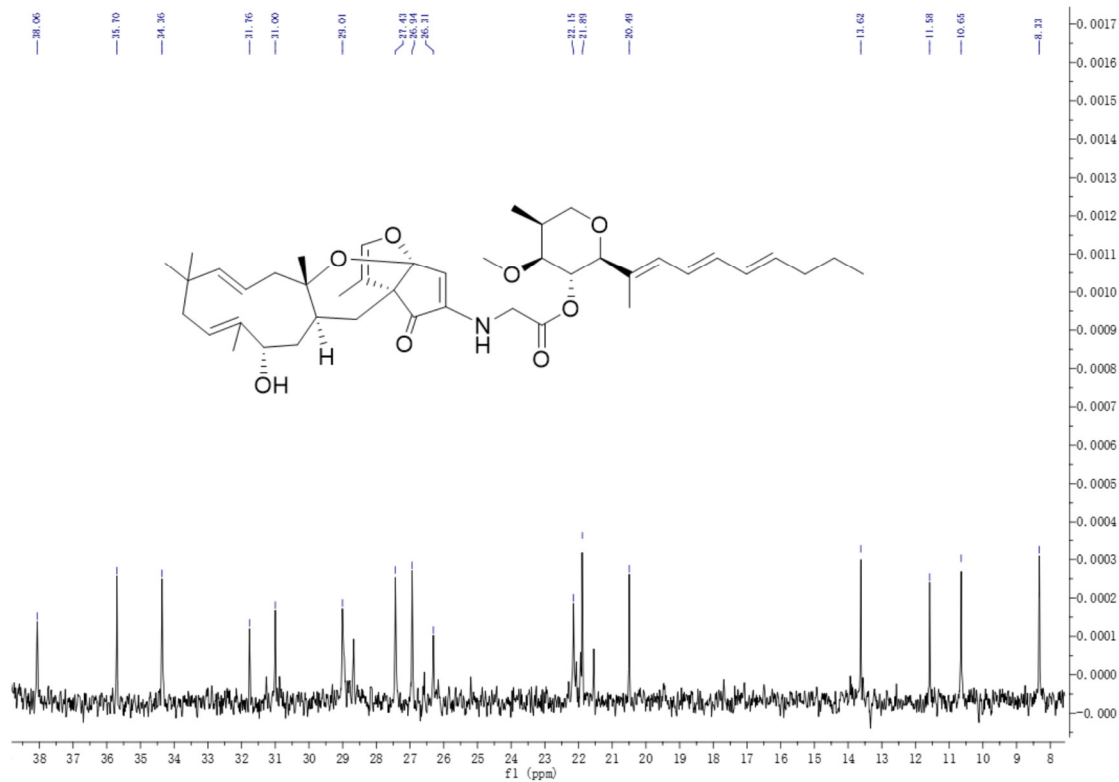

Figure S33. HMQC spectrum of penipyradinone B (**1**, in DMSO- $d_6$ )

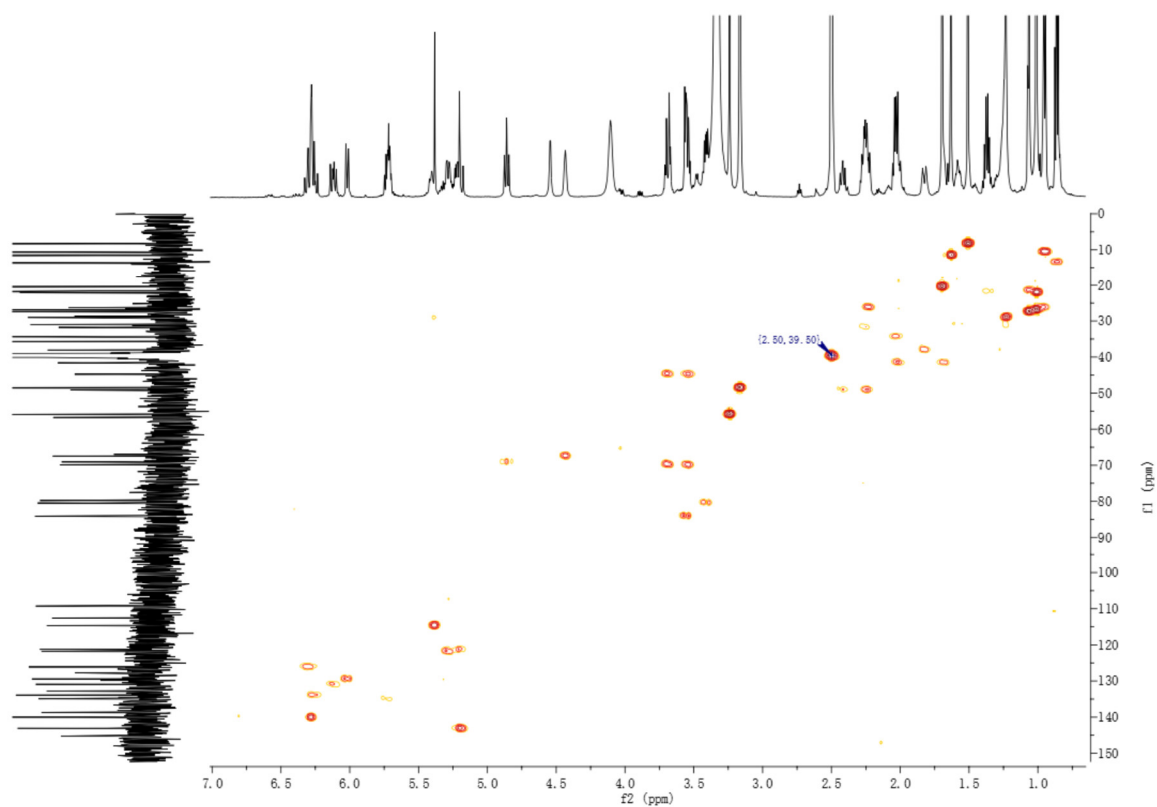

Figure S34. HMQC spectrum of penipyradinone B (**1**, in DMSO- $d_6$ )

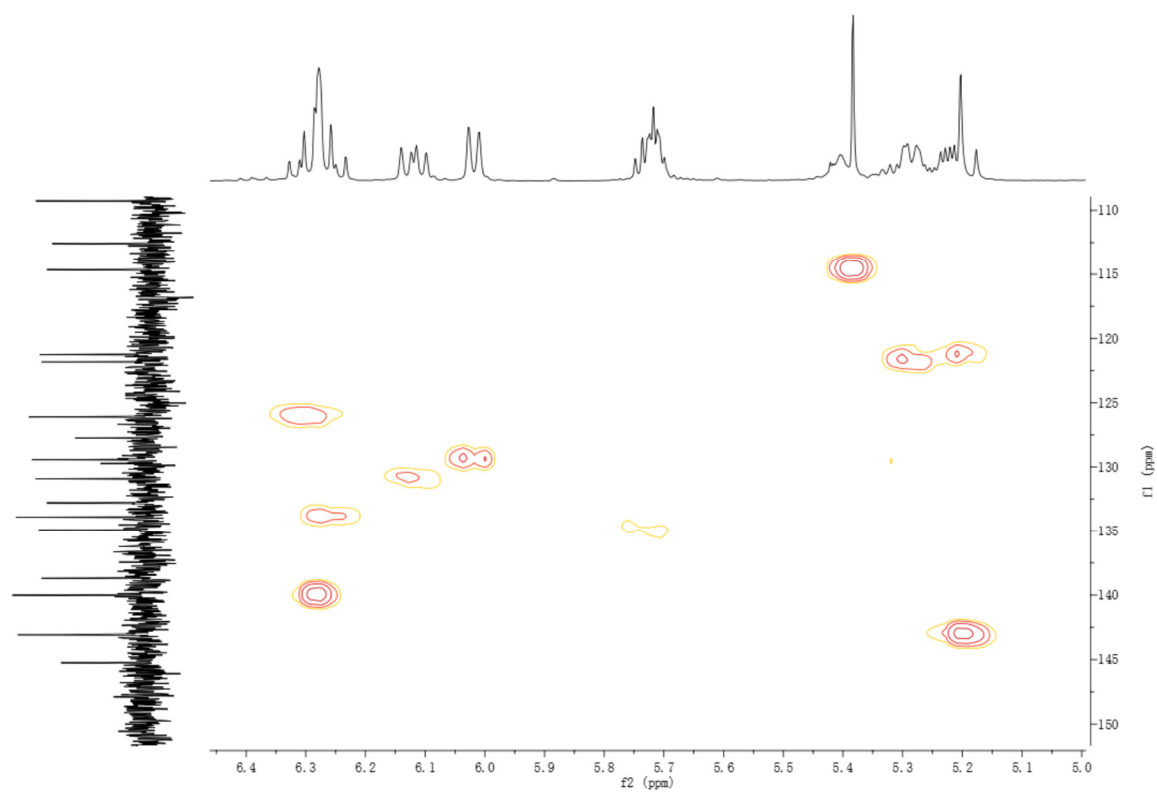

Figure S35. HMQC spectrum of penipyrindinone B (**1**, in DMSO-*d*<sub>6</sub>)

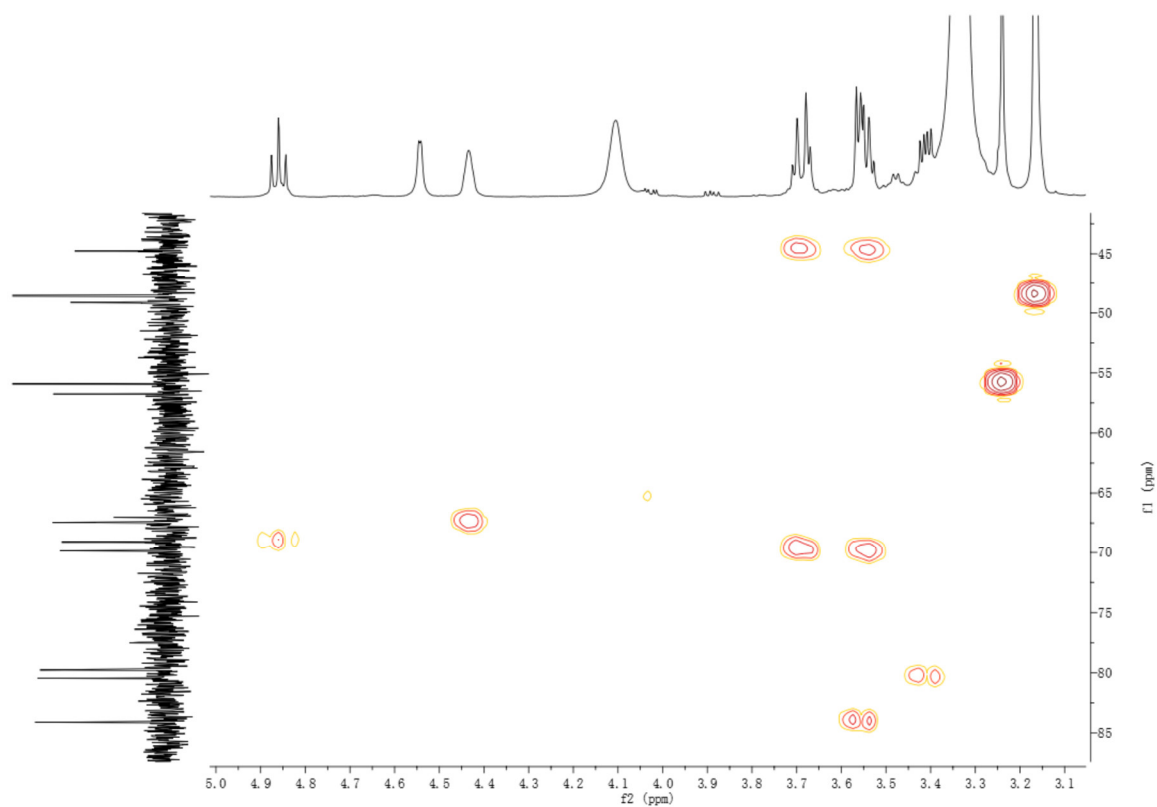

Figure S36. HMQC spectrum of penipyrindinone B (**1**, in DMSO-*d*<sub>6</sub>)

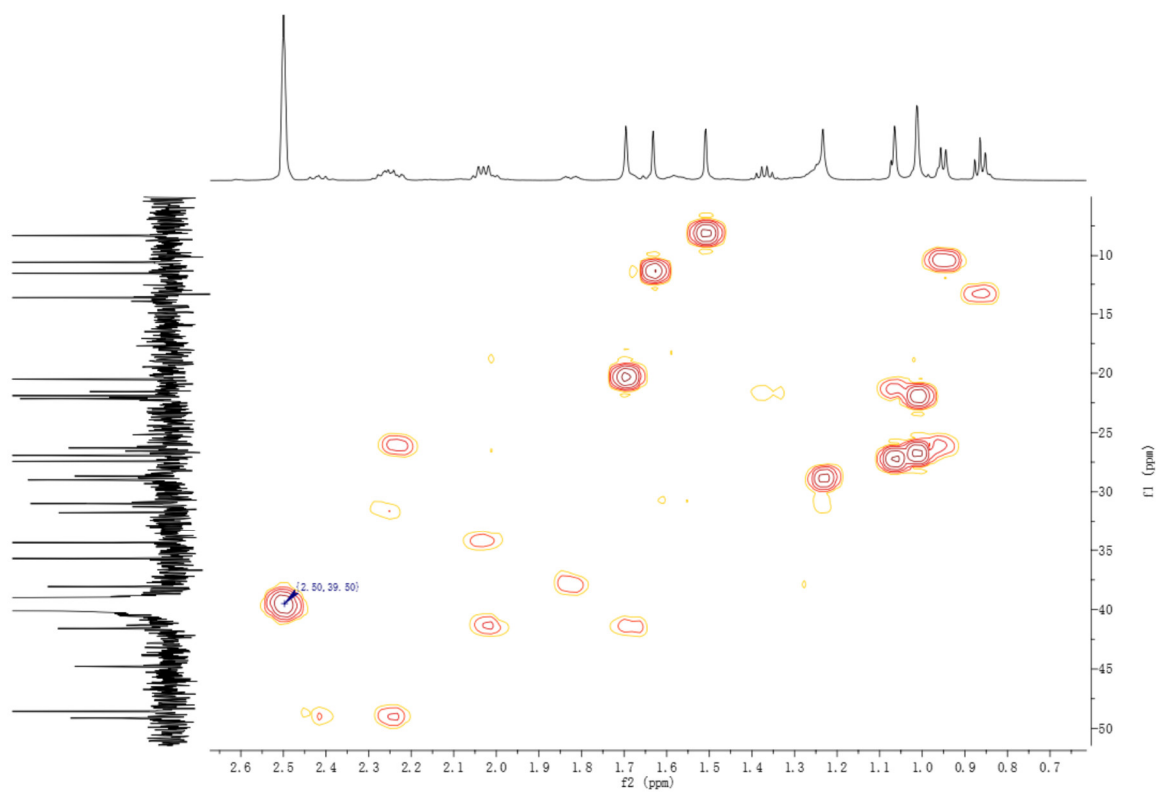

Figure S37. HMBC spectrum of penipyridinone B (**1**, in DMSO-*d*<sub>6</sub>)

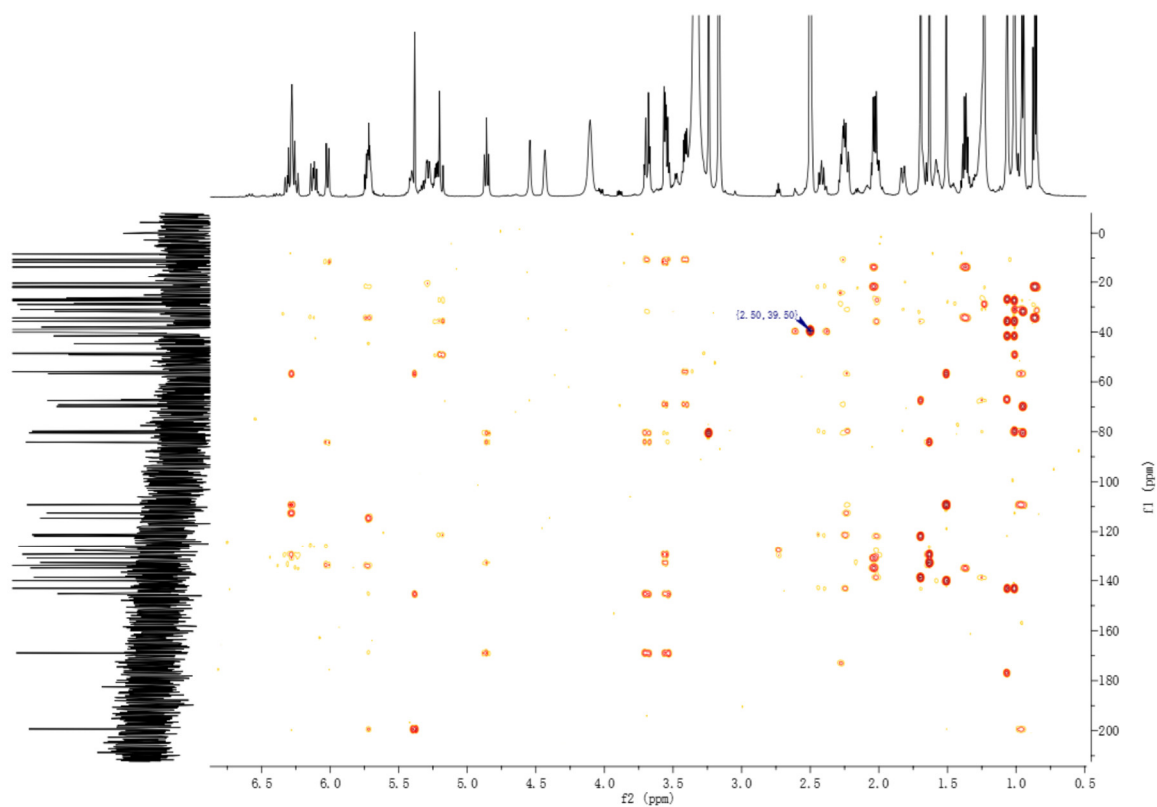

Figure S38. HMBC spectrum of penipyridinone B (**1**, in DMSO-*d*<sub>6</sub>)

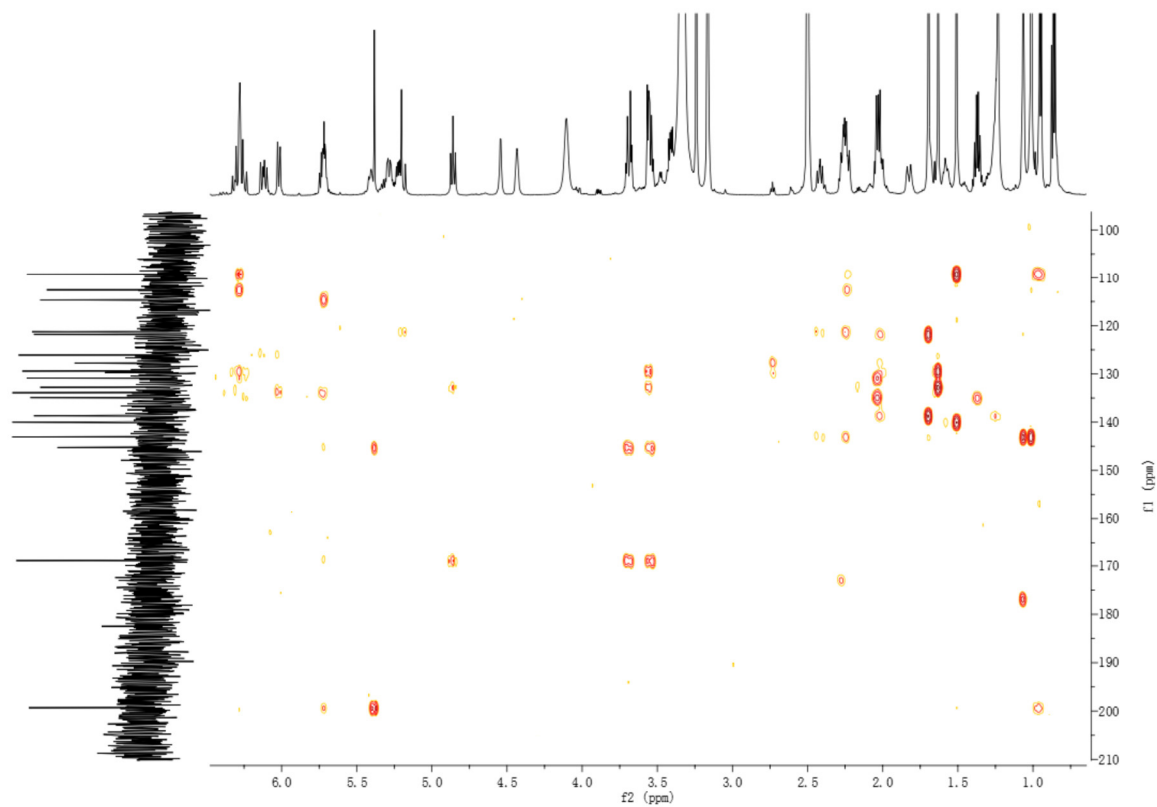

Figure S39. HMBC spectrum of penipyrindinone B (**1**, in DMSO-*d*<sub>6</sub>)

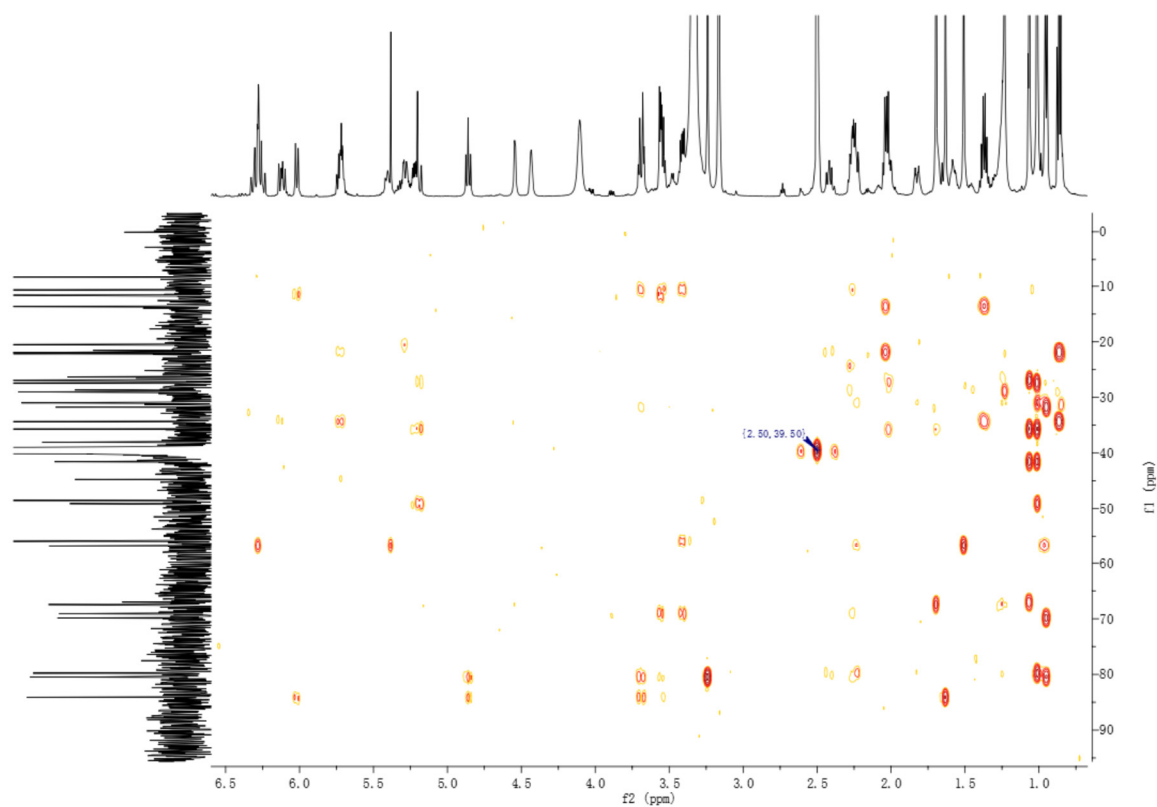

Figure S40. HRESIMS spectrum of penipyrindinone B (**1**)

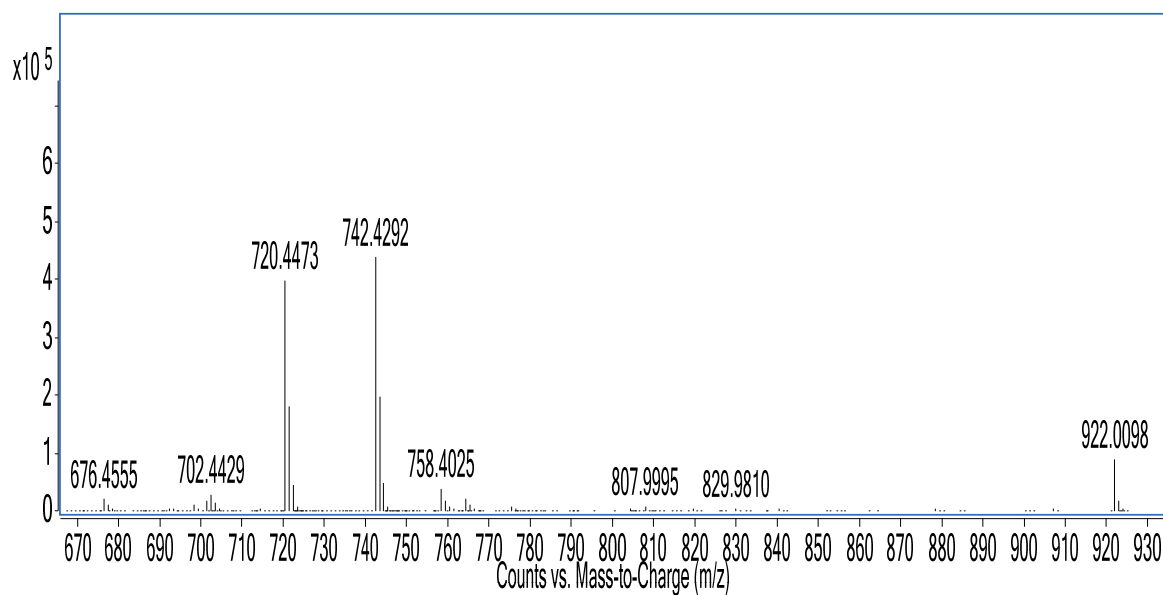

[M+H]<sup>+</sup>: 720.4473 (calcd for C<sub>43</sub>H<sub>62</sub>NO<sub>8</sub><sup>+</sup>, 720.4475), [M+Na]<sup>+</sup>: 742.4292 (calcd for C<sub>43</sub>H<sub>61</sub>NNaO<sub>8</sub><sup>+</sup>, 742.4295).

Figure S41.  $^1\text{H}$  NMR spectrum of **1s**

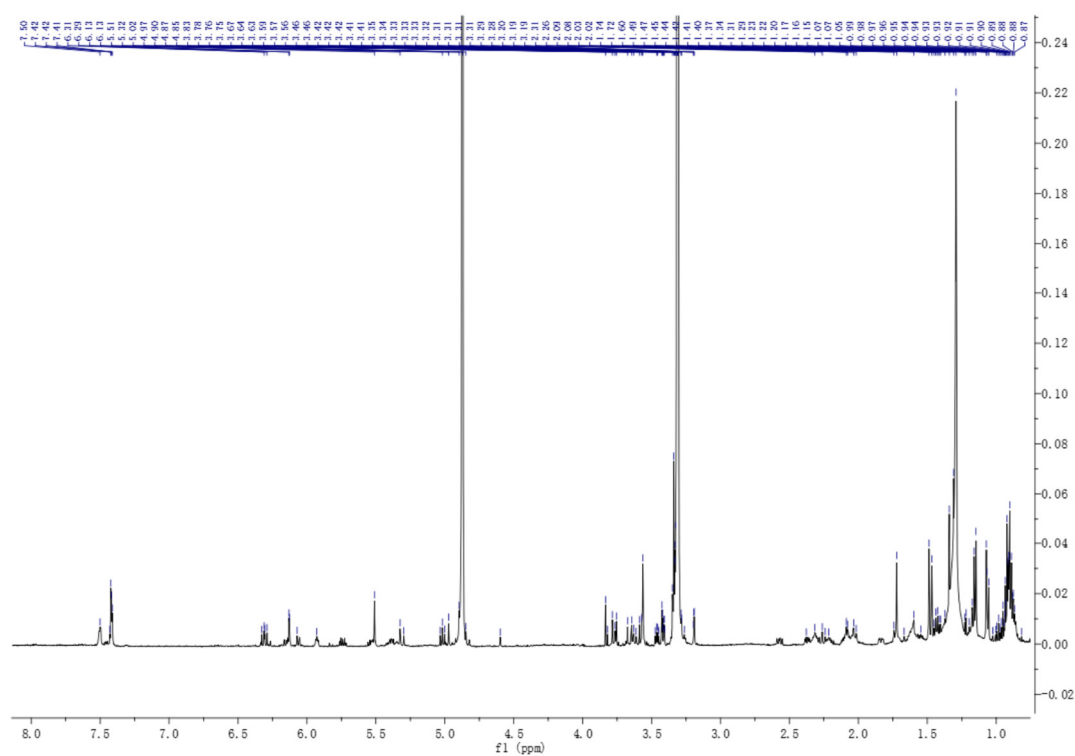

Figure S42. COSY NMR spectrum of **1s**

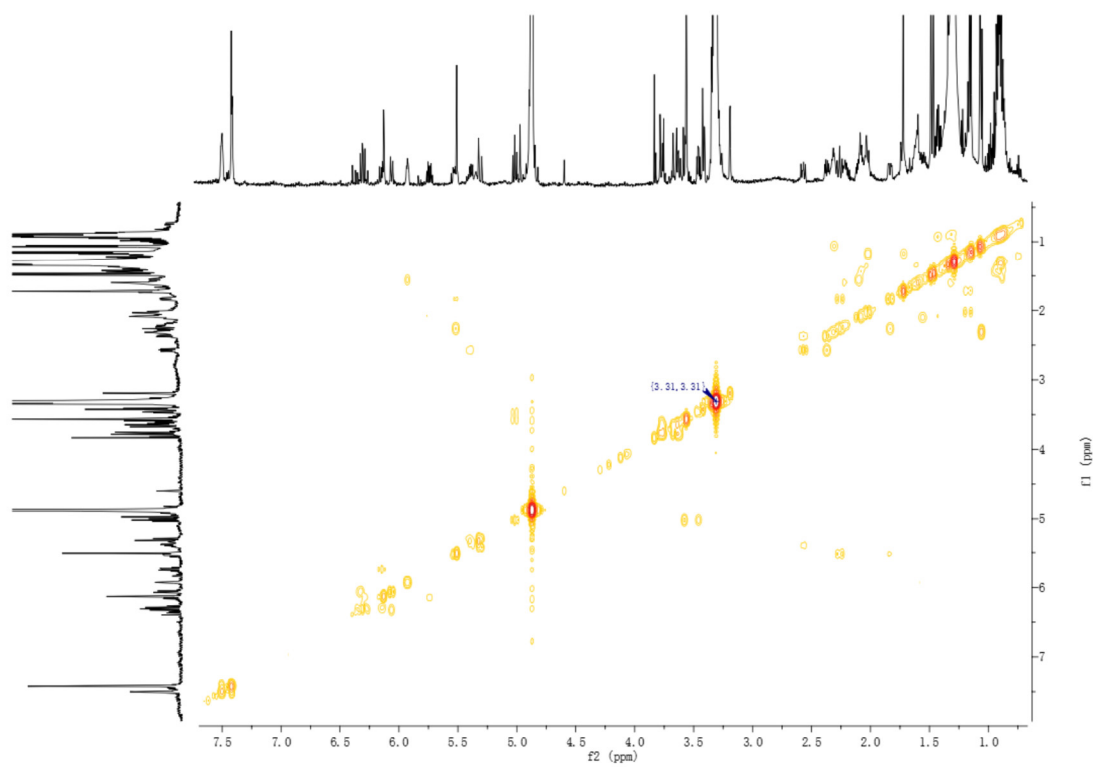

Figure S43. HRESIMS spectrum of **1s**

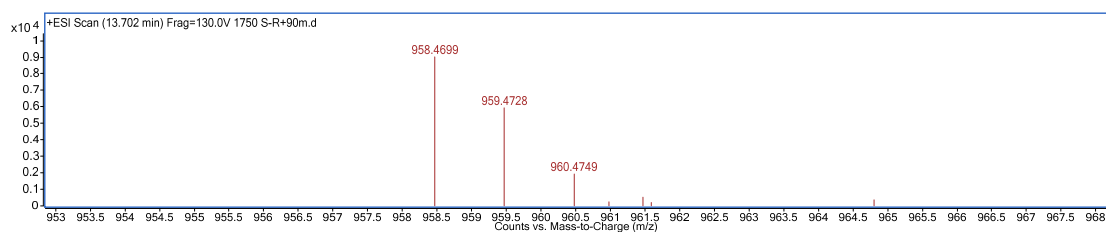

[M+Na]<sup>+</sup>: 958.4699 (calcd for C<sub>53</sub>H<sub>68</sub>F<sub>3</sub>NNaO<sub>10</sub><sup>+</sup>, 958.4688).

Figure S44. <sup>1</sup>H NMR spectrum of **1r**

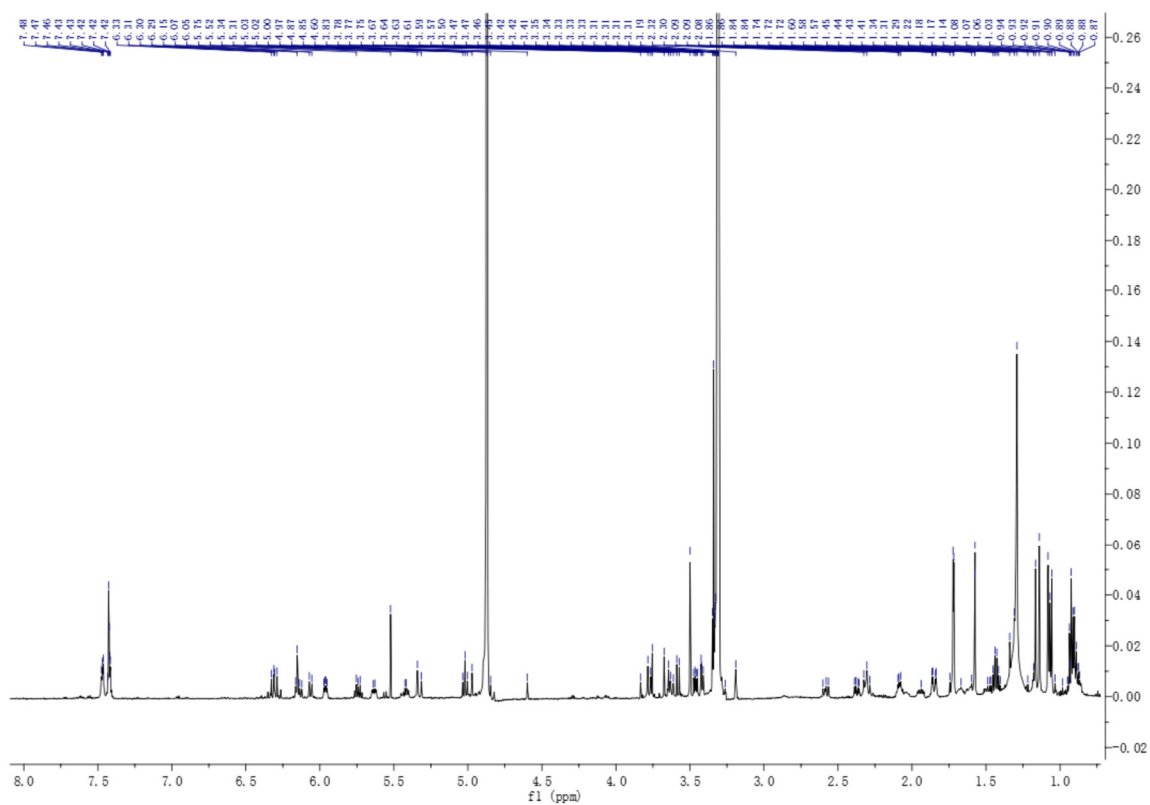



Figure S45. COSY spectrum of **1r**

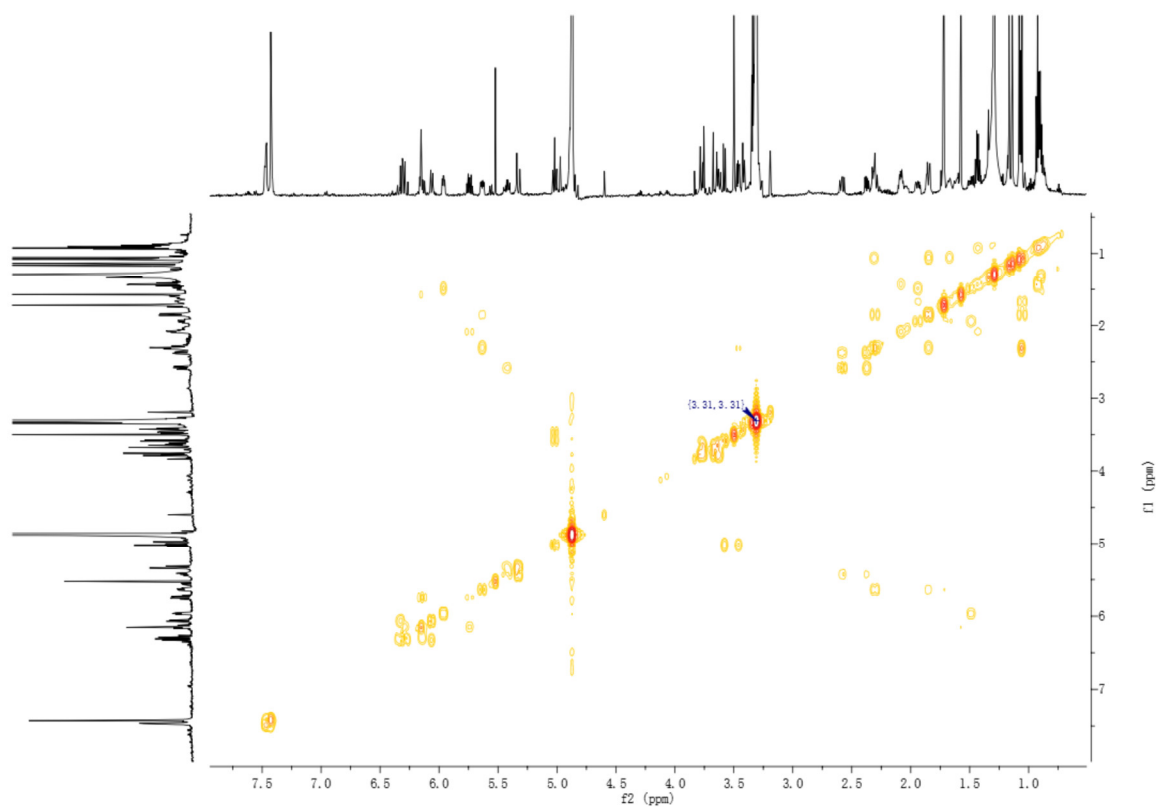

Figure S46. HRESIMS spectrum of **1r**

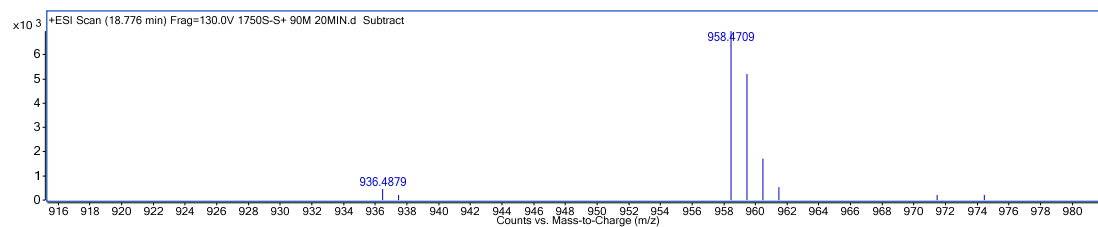

$[M+H]^+$ : 936.4879 (calcd for  $C_{53}H_{69}F_3NO_{10}^+$ , 936.4868);  $[M+Na]^+$ : 958.4709 (calcd for  $C_{53}H_{68}F_3NNaO_{10}^+$ , 958.4688).

Figure S47.  $^1\text{H}$  NMR spectrum of penilloid B (**2**, in  $\text{DMSO}-d_6$ )

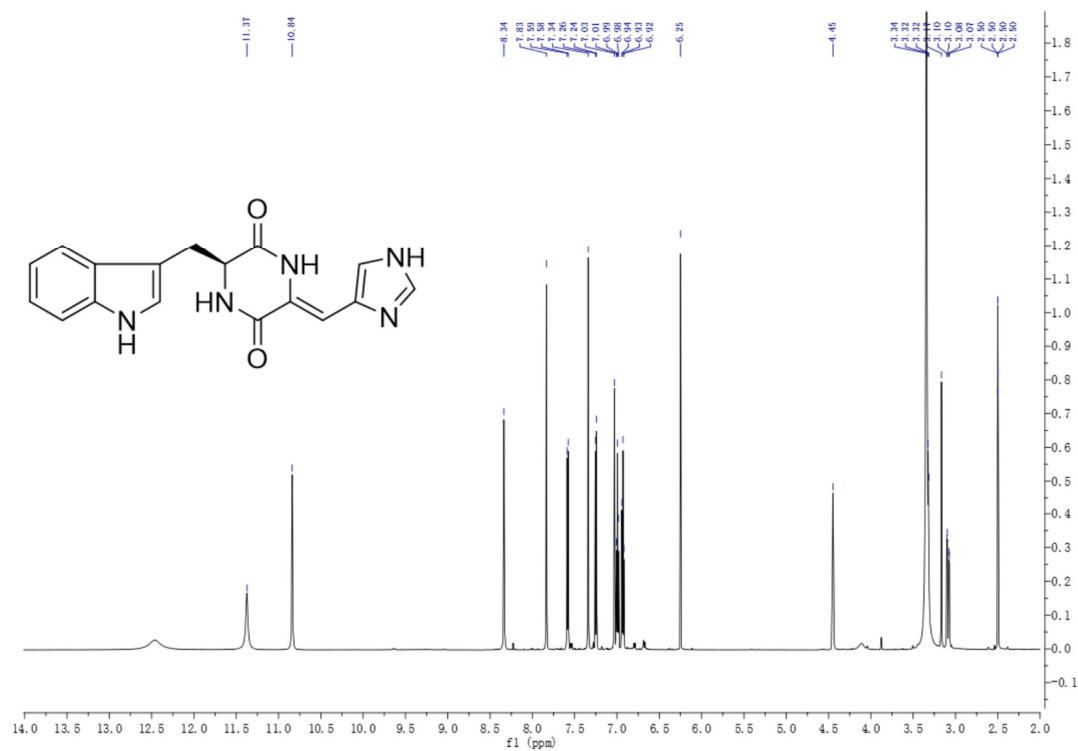

Figure S48.  $^1\text{H}$  NMR spectrum of penilloid B (**2**, in  $\text{DMSO}-d_6$ )

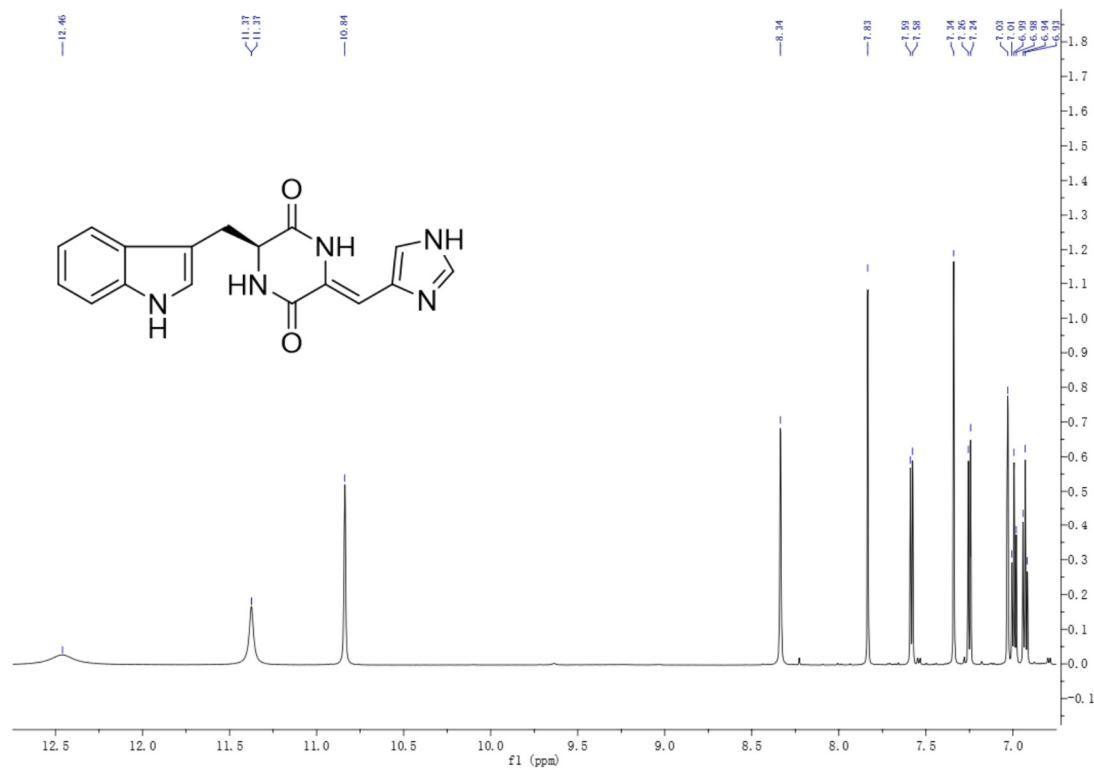

Figure S49.  $^1\text{H}$  NMR spectrum of penilloid B (**2**, in  $\text{DMSO-}d_6$ )

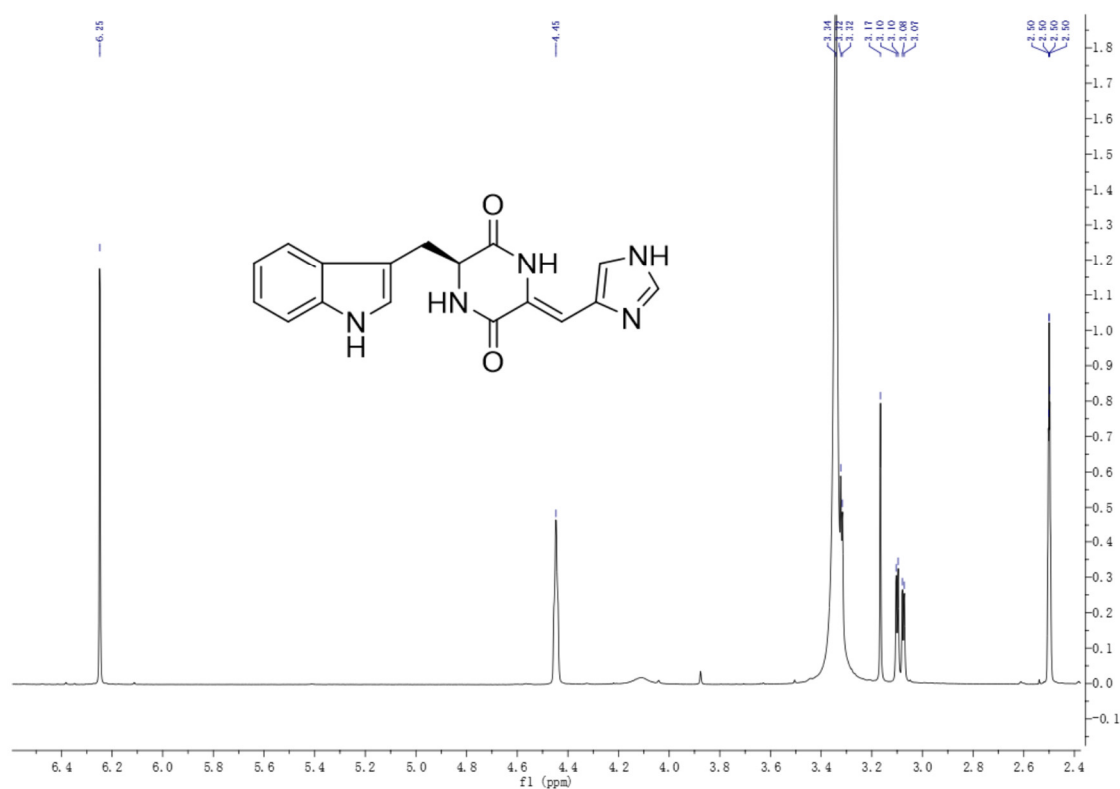

Figure S50.  $^{13}\text{C}$  NMR spectrum of penilloid B (**2**, in  $\text{DMSO-}d_6$ )

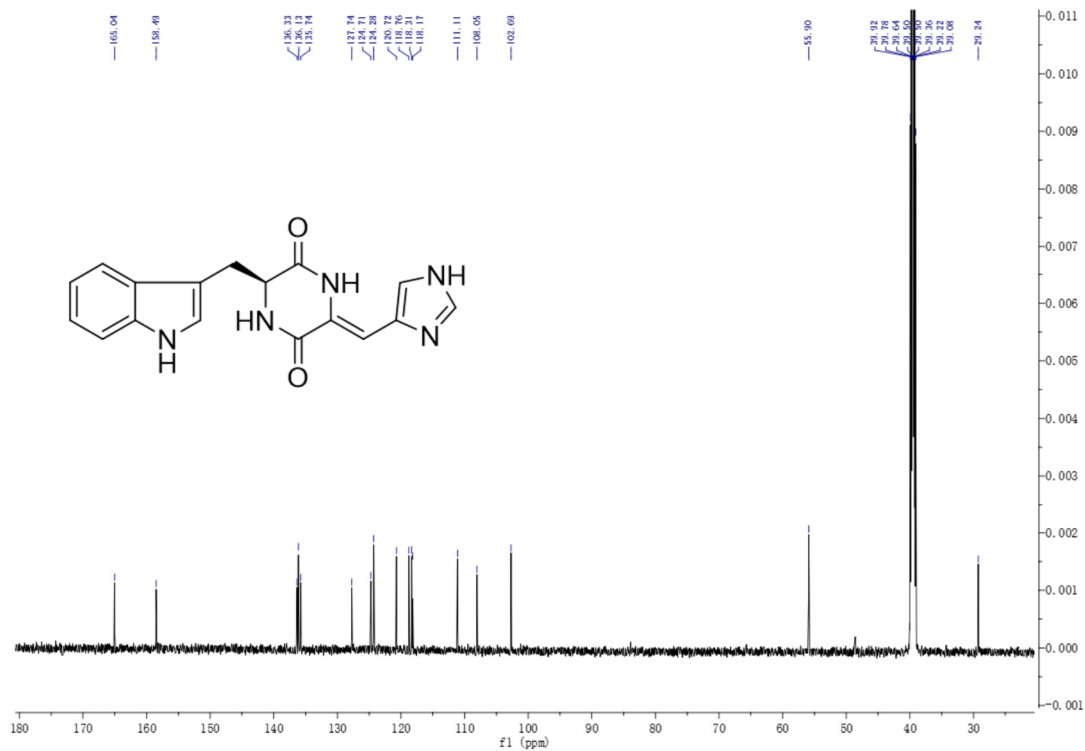

Figure S51.  $^{13}\text{C}$  NMR spectrum of penilloid B (**2**, in  $\text{DMSO}-d_6$ )

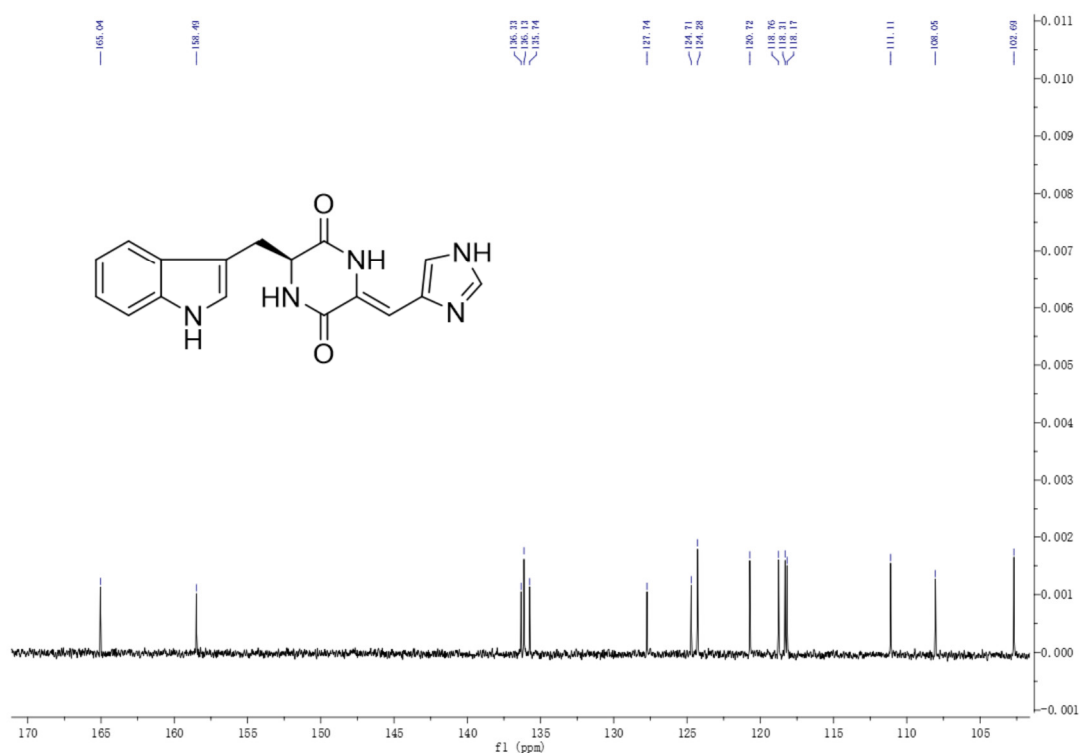

Figure S52. HMQC spectrum of penilloid B (**2**, in  $\text{DMSO}-d_6$ )

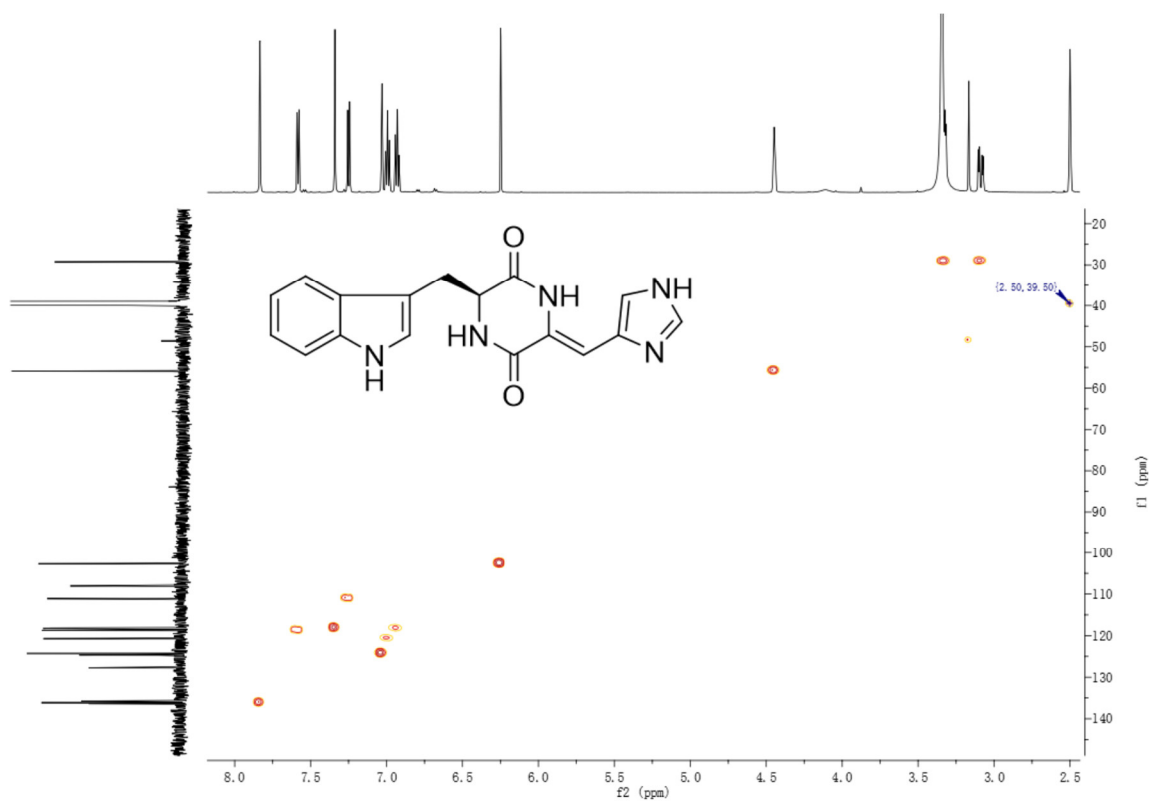

Figure S53. HMQC spectrum of penilloid B (**2**, in DMSO-*d*<sub>6</sub>)

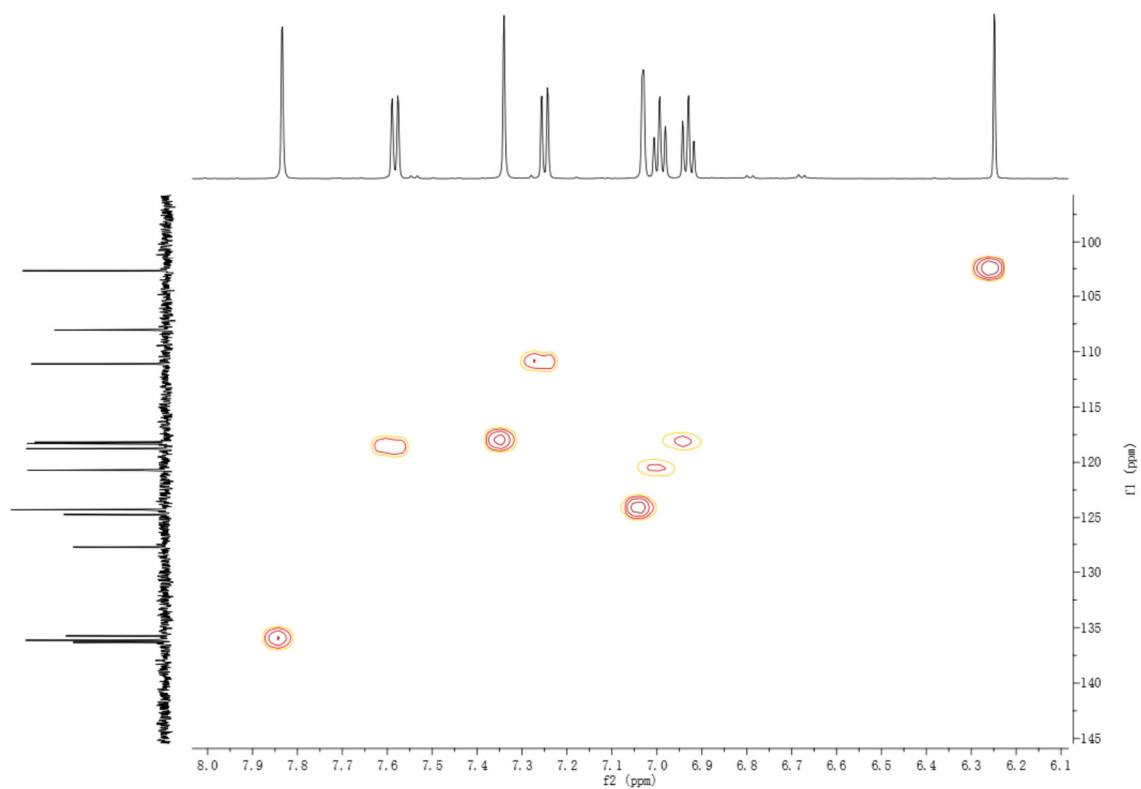

Figure S54. COSY spectrum of penilloid B (**2**, in DMSO-*d*<sub>6</sub>)

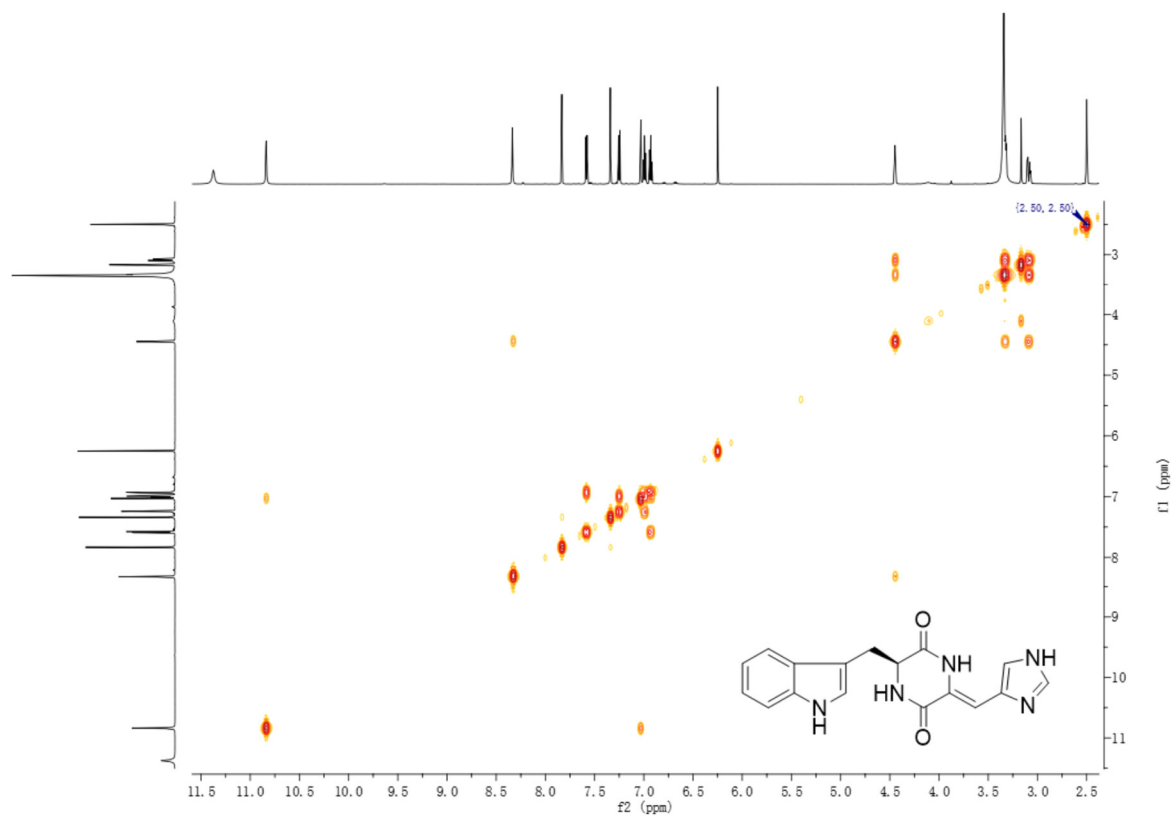

Figure S55. HMBC spectrum of penilloid B (**2**, in DMSO-*d*<sub>6</sub>)

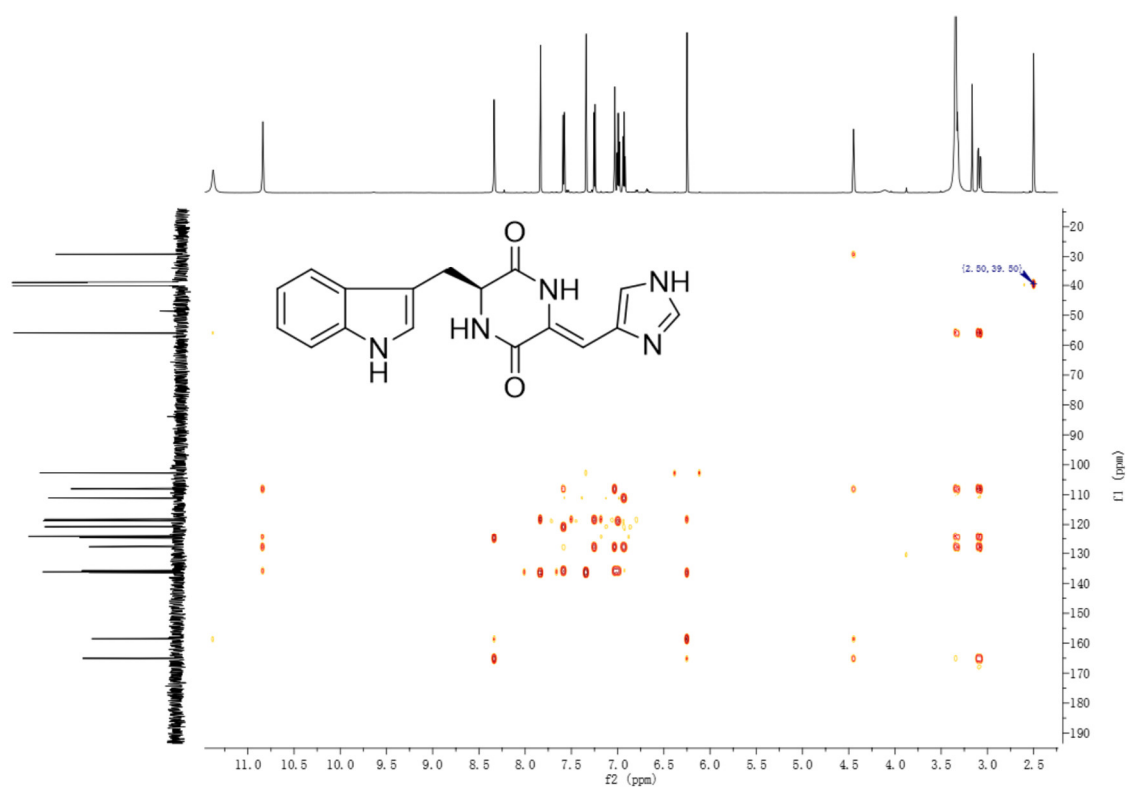

Figure S56. HMBC spectrum of penilloid B (**2**, in DMSO-*d*<sub>6</sub>)

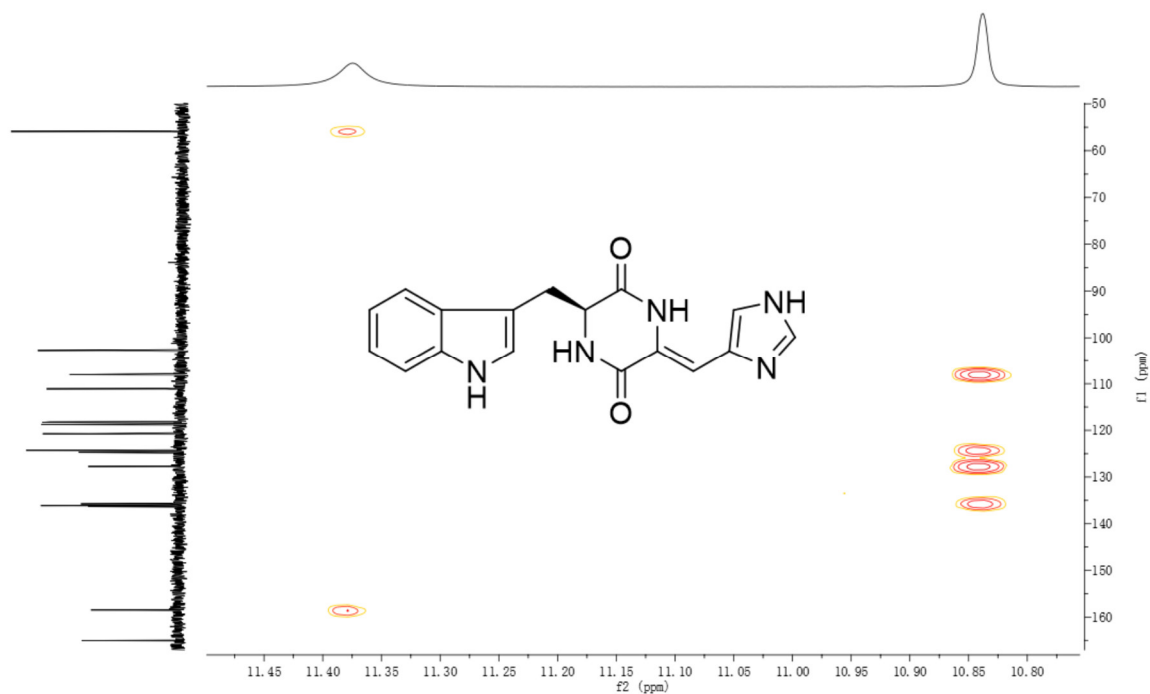

Figure S57. HMBC spectrum of penilloid B (**2**, in DMSO-*d*<sub>6</sub>)

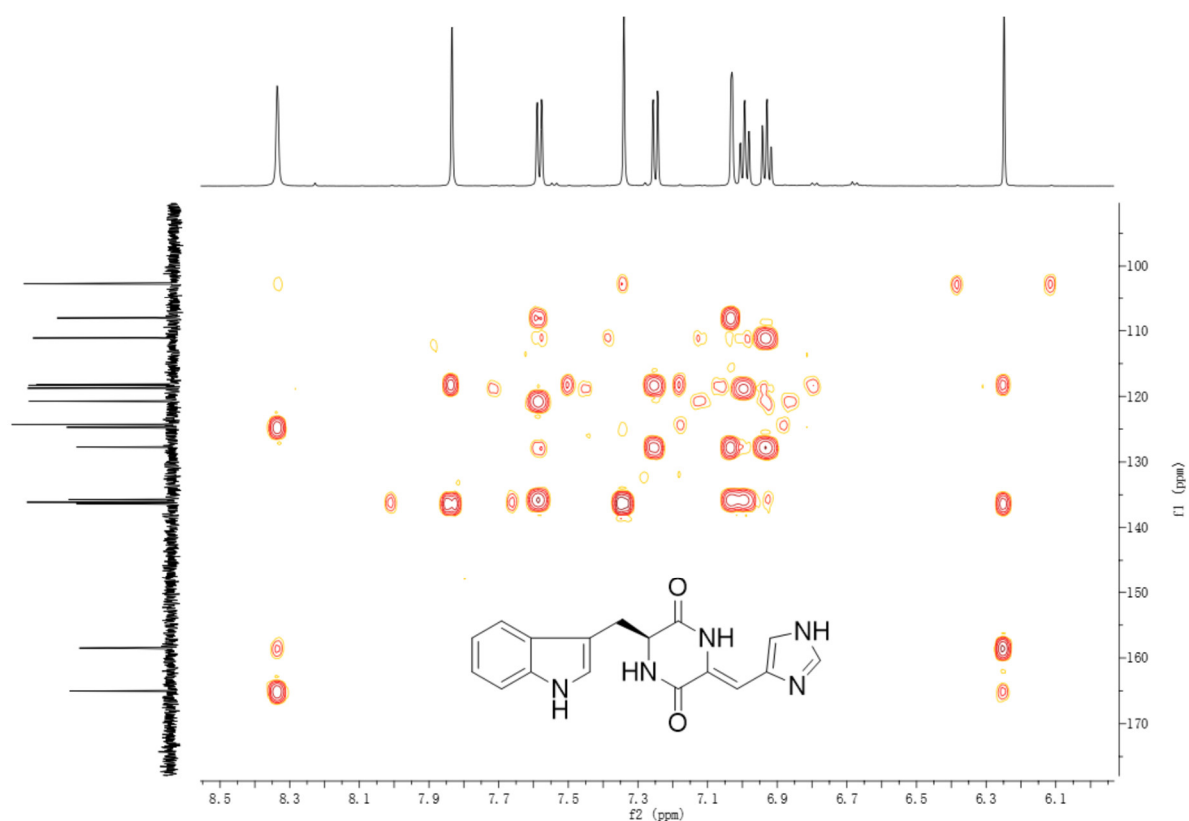

Figure S58. HMBC spectrum of penilloid B (**2**, in DMSO-*d*<sub>6</sub>)

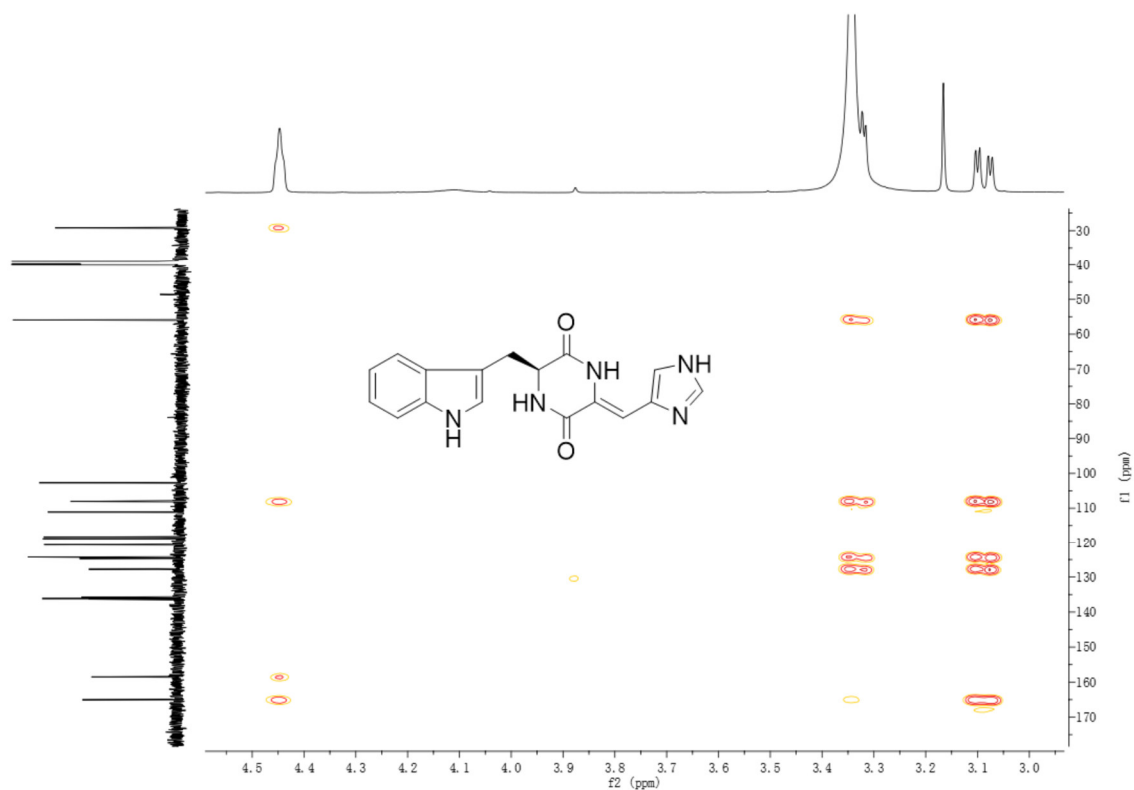

Figure S59. NOESY spectrum of penilloid B (**2**, in DMSO-*d*<sub>6</sub>)

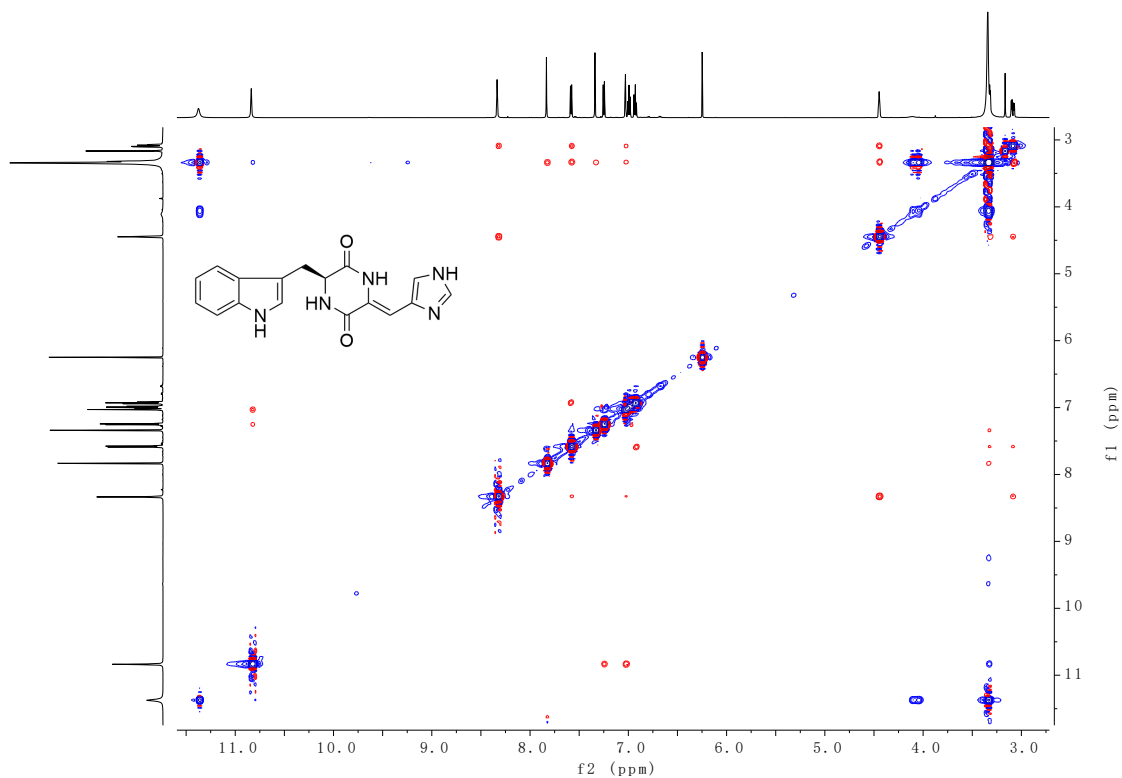

Figure S60. <sup>1</sup>H NMR spectrum of penilloid B (**2**, in MeOH-*d*<sub>4</sub>)

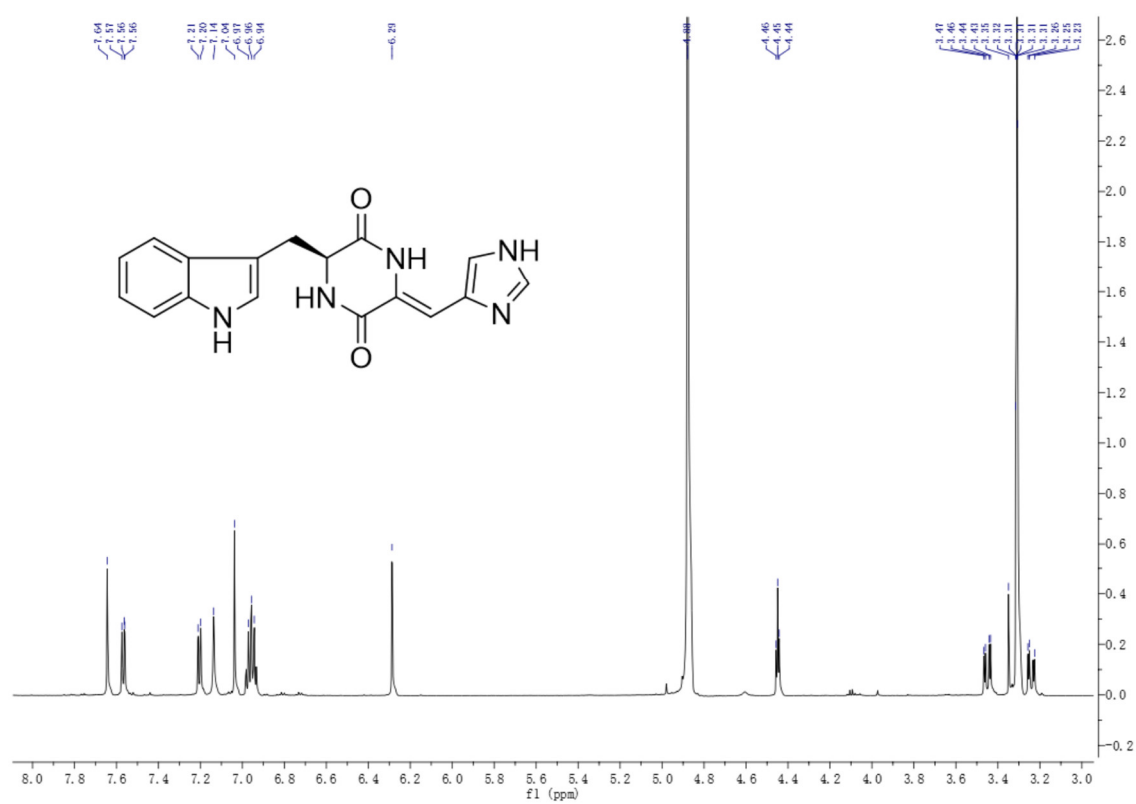



Figure S61.  $^1\text{H}$  NMR spectrum of penilloid B (**2**, in  $\text{MeOH-}d_4$ )

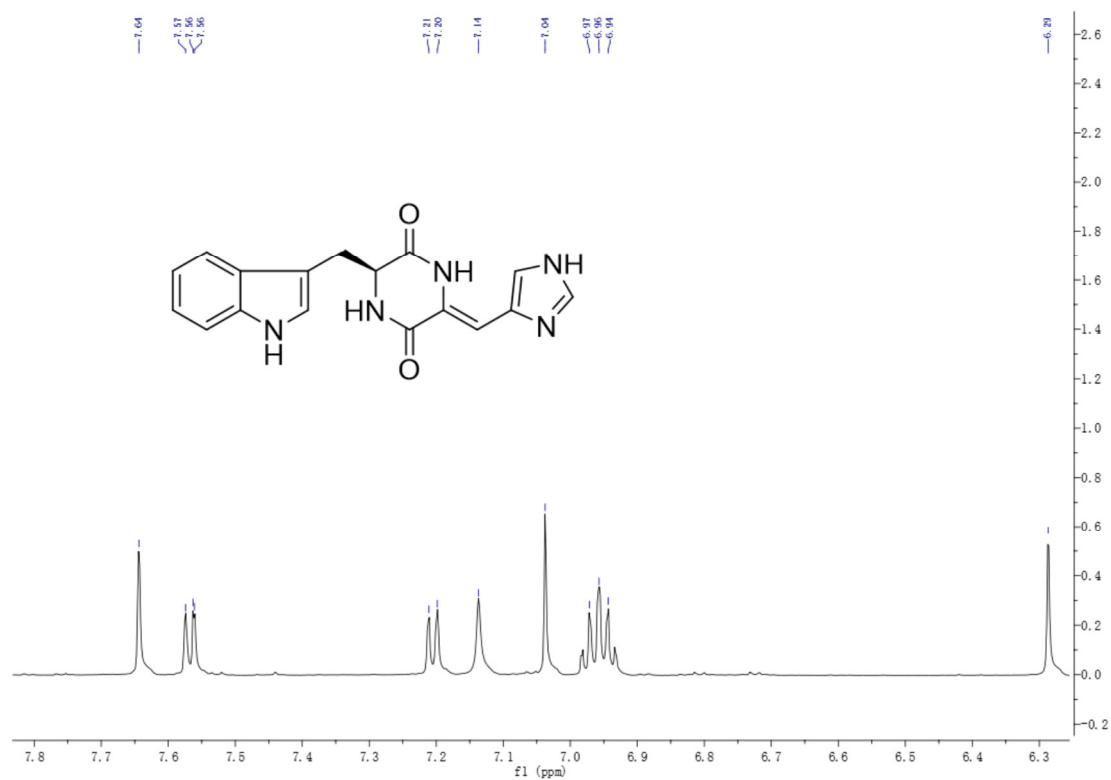

Figure S62.  $^1\text{H}$  NMR spectrum of penilloid B (**2**, in  $\text{MeOH-}d_4$ )

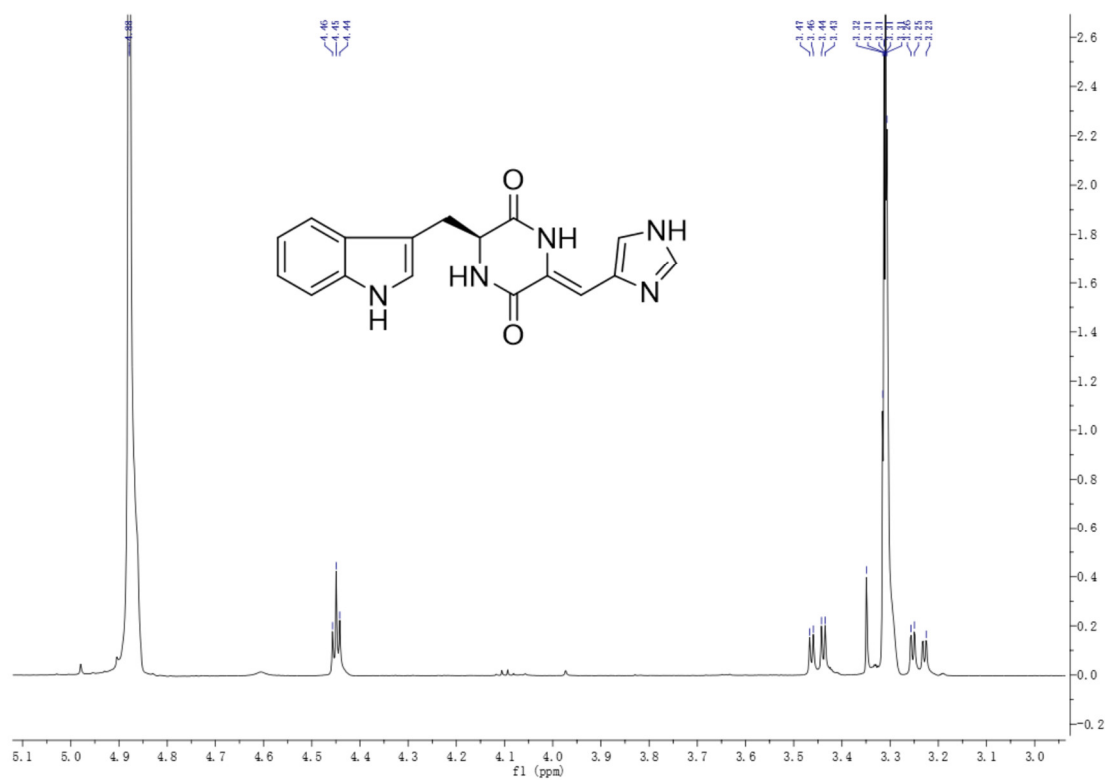

Figure S63.  $^{13}\text{C}$  NMR spectrum of penilloid B (**2**, in  $\text{MeOH-}d_4$ )

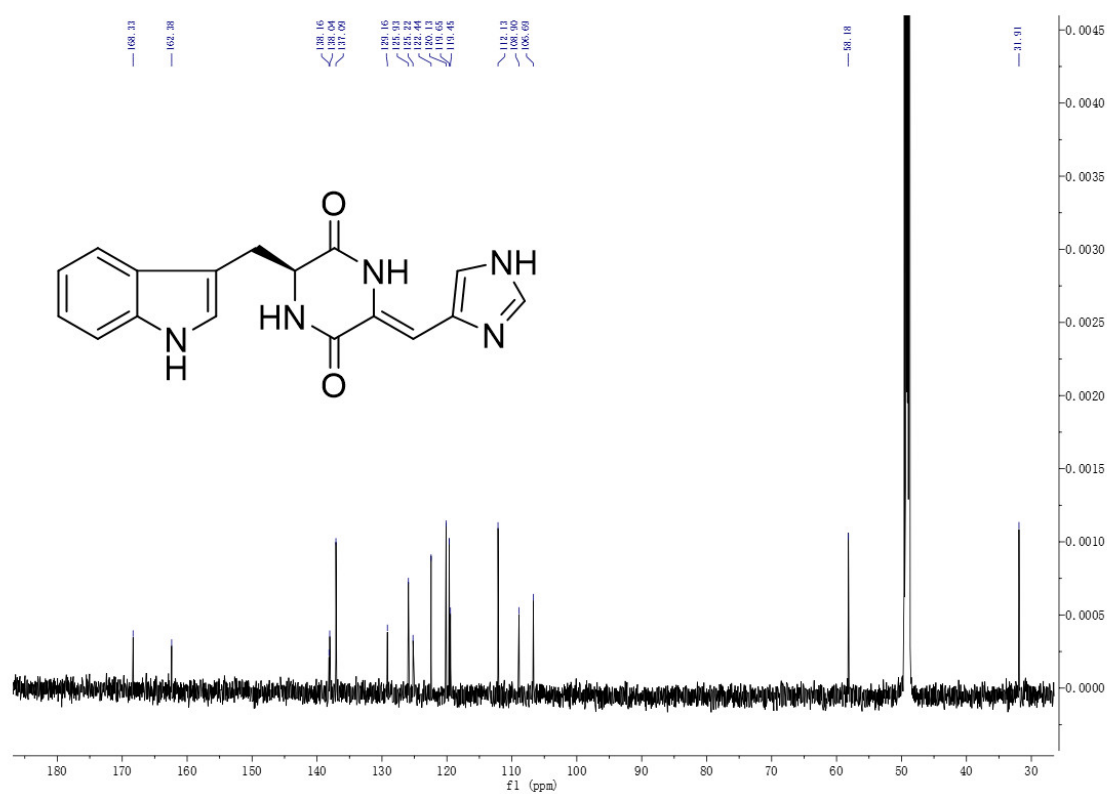

Figure S64.  $^{13}\text{C}$  NMR spectrum of penilloid B (**2**, in  $\text{MeOH-}d_4$ )

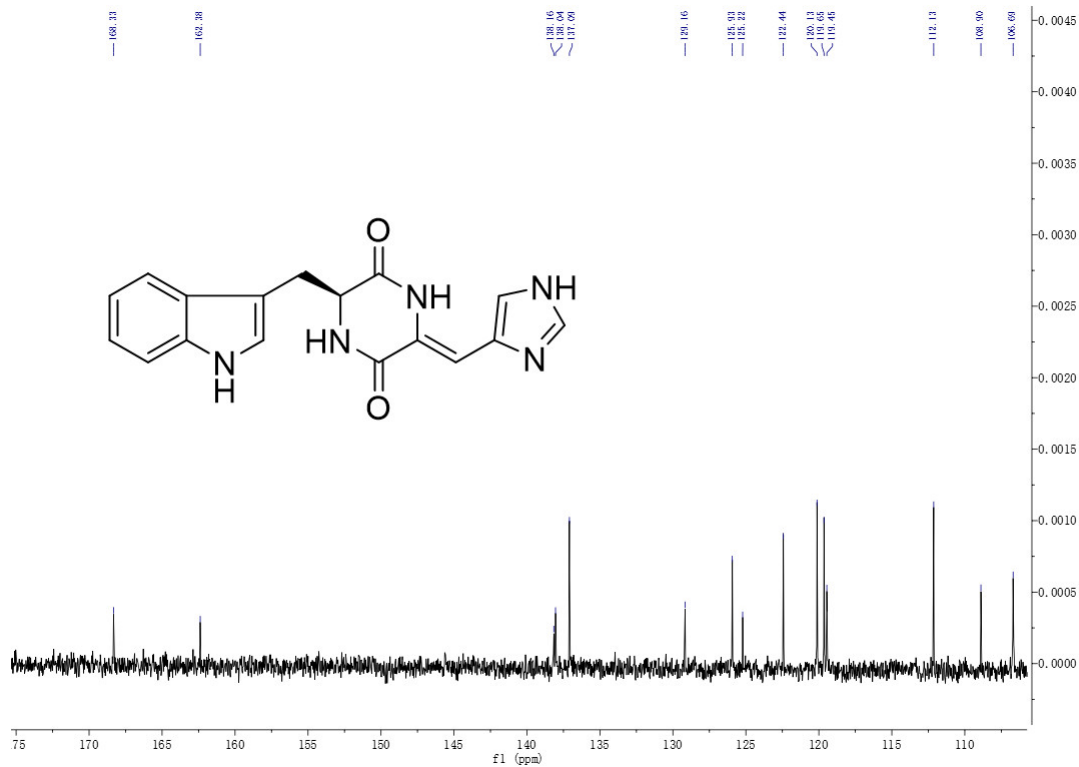

Figure S65. HRESIMS spectrum of penilloid B (**2**)

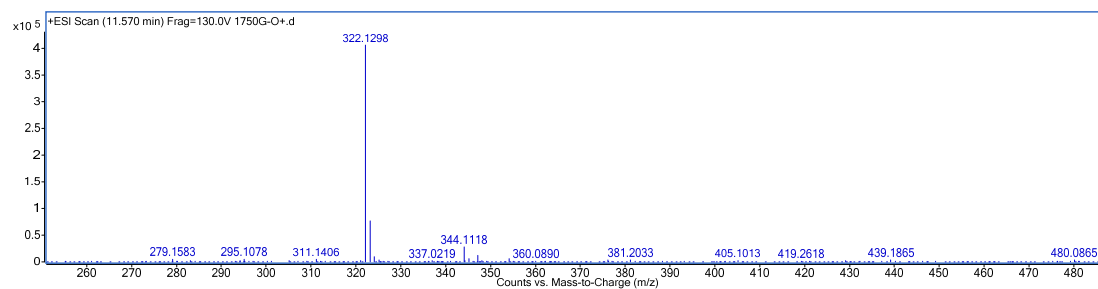

$[M+H]^+$ :  $m/z$  322.1298 (calcd for  $C_{17}H_{16}N_5O_2^+$ , 322.1299);  $[M+Na]^+$   $m/z$  344.1118 (calcd for  $C_{17}H_{15}N_5NaO_2^+$ , 344.1118).

Figure S66.  $^1H$  NMR spectrum of penilloid C (**3**, in  $DMSO-d_6$ )

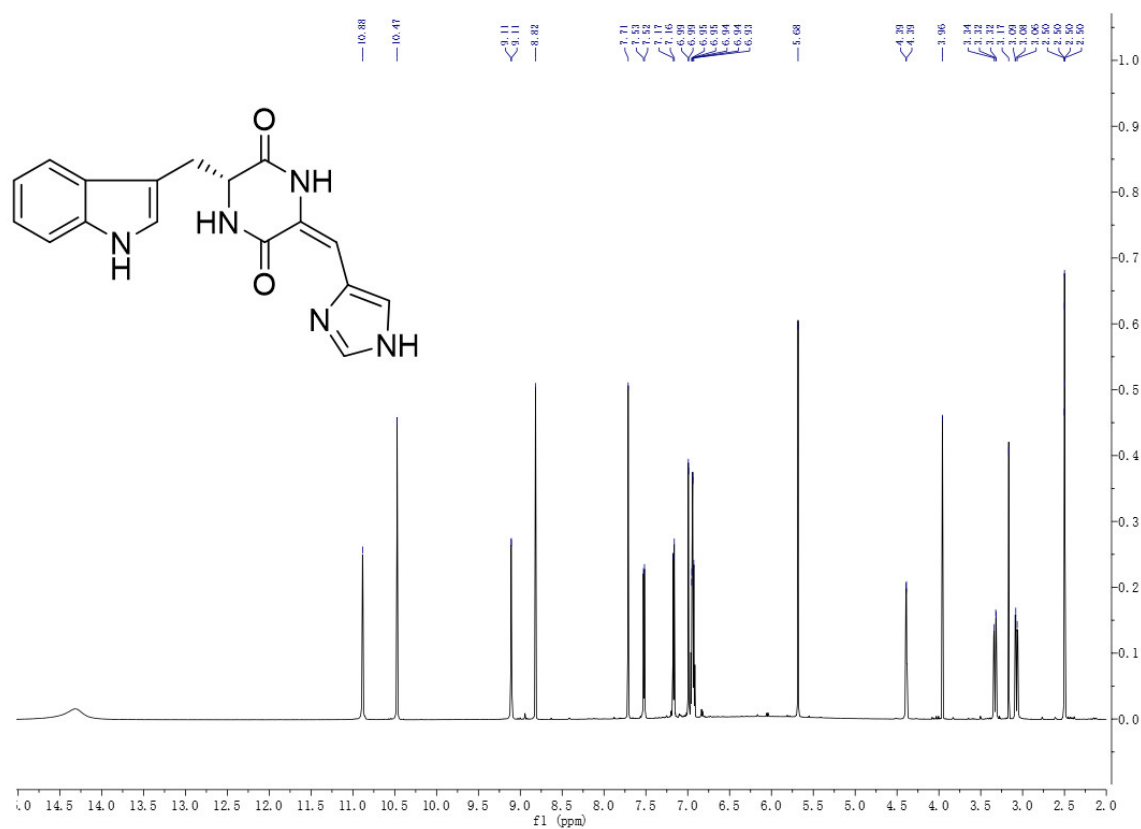

Figure S67.  $^1\text{H}$  NMR spectrum of penilloid C (**3**, in  $\text{DMSO}-d_6$ )

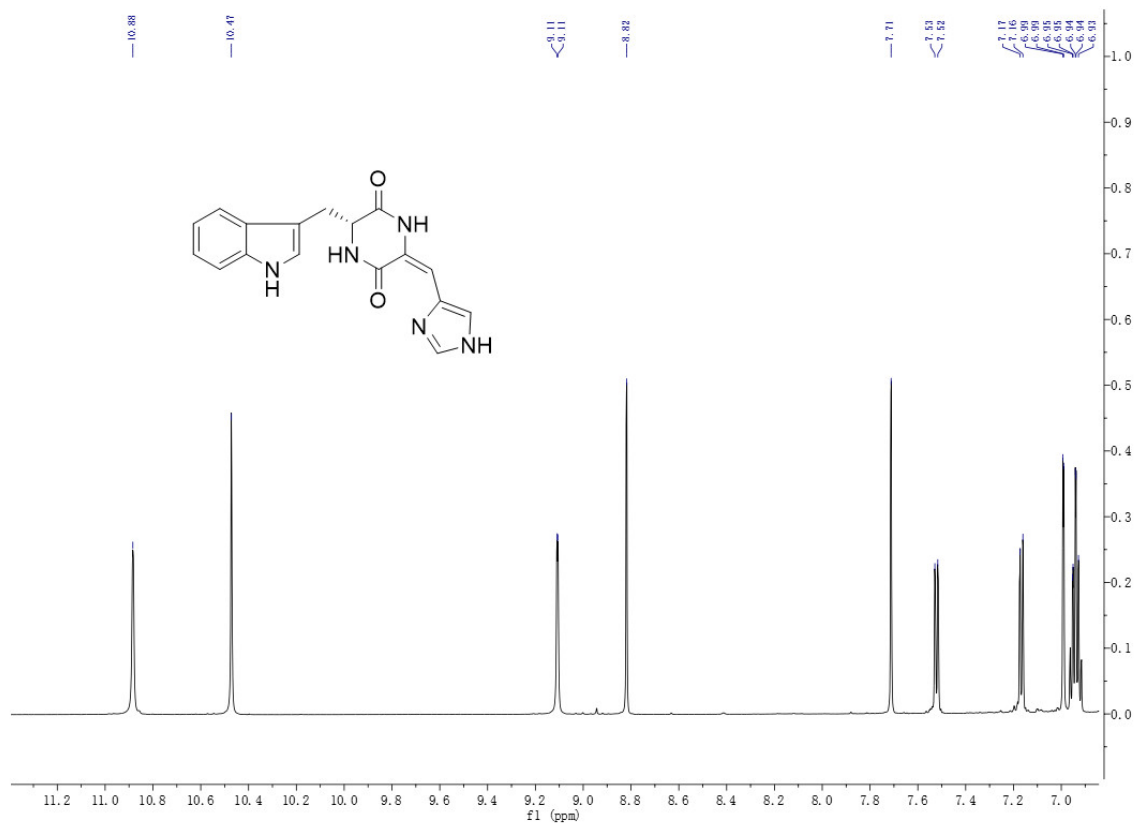

Figure S68.  $^1\text{H}$  NMR spectrum of penilloid C (**3**, in  $\text{DMSO}-d_6$ )

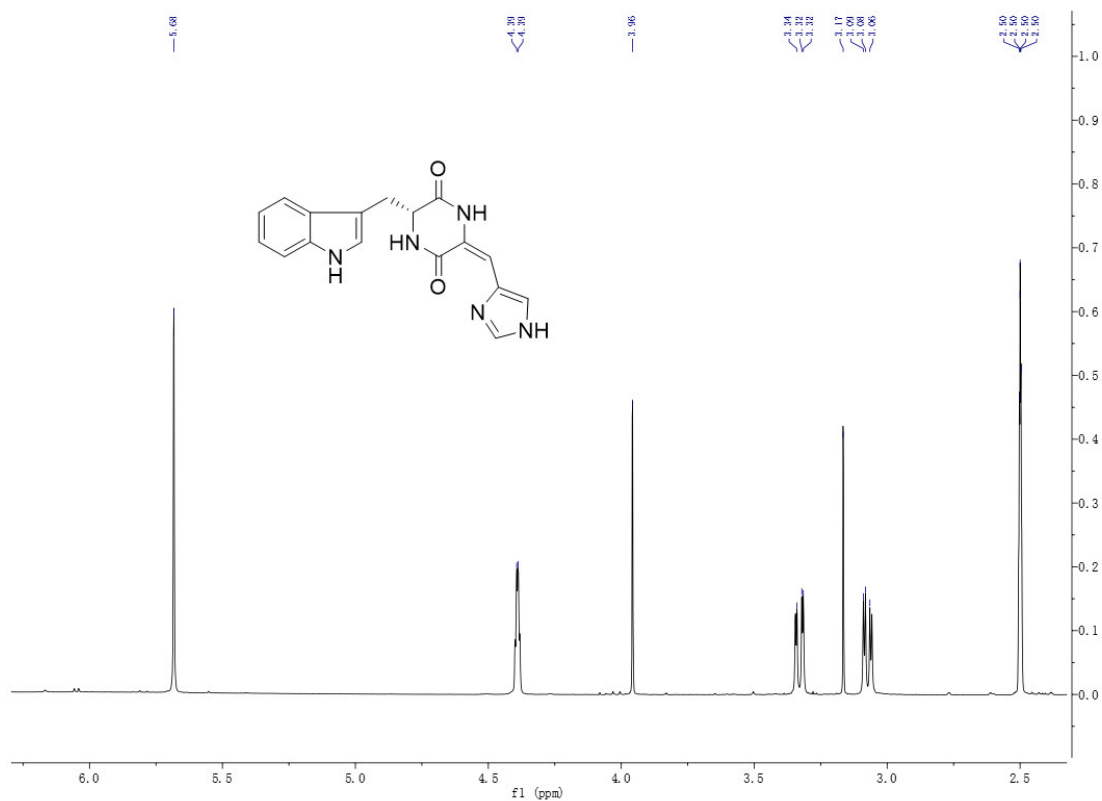

Figure S69.  $^{13}\text{C}$  NMR spectrum of penilloid C (**3**, in  $\text{DMSO}-d_6$ )

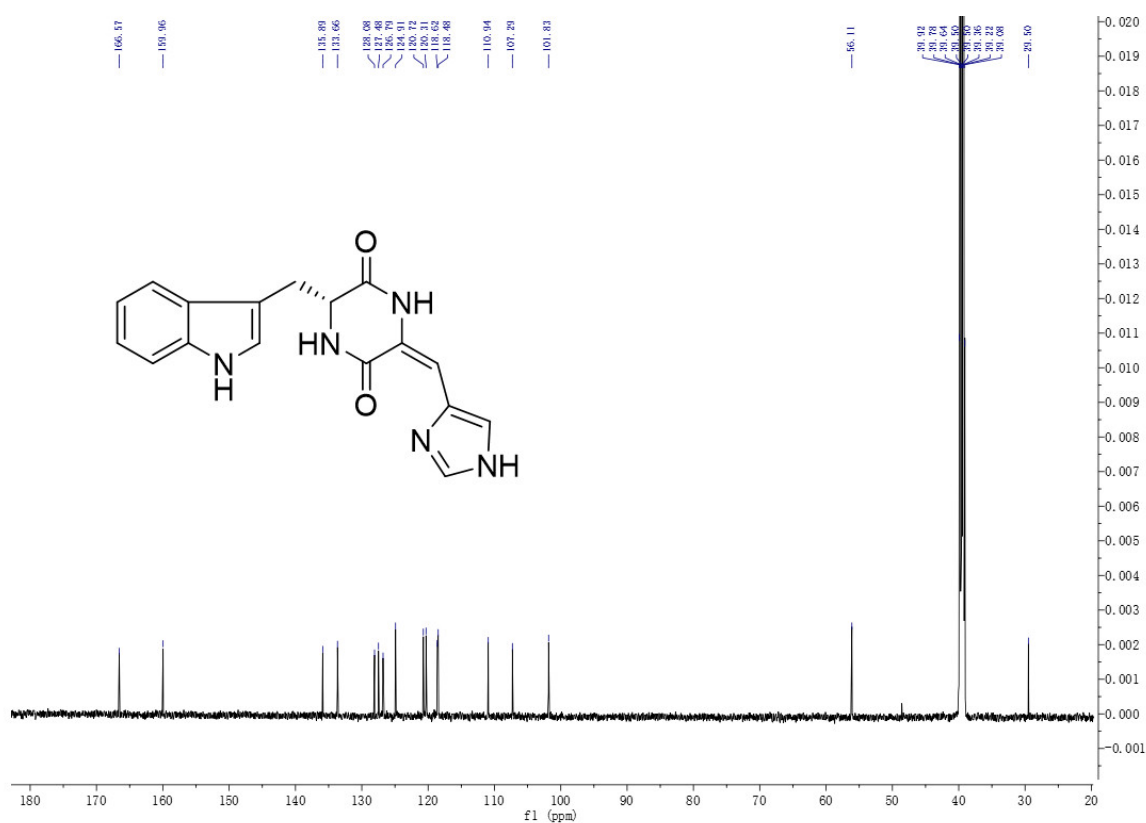

Figure S70.  $^{13}\text{C}$  NMR spectrum of penilloid C (**3**, in  $\text{DMSO}-d_6$ )

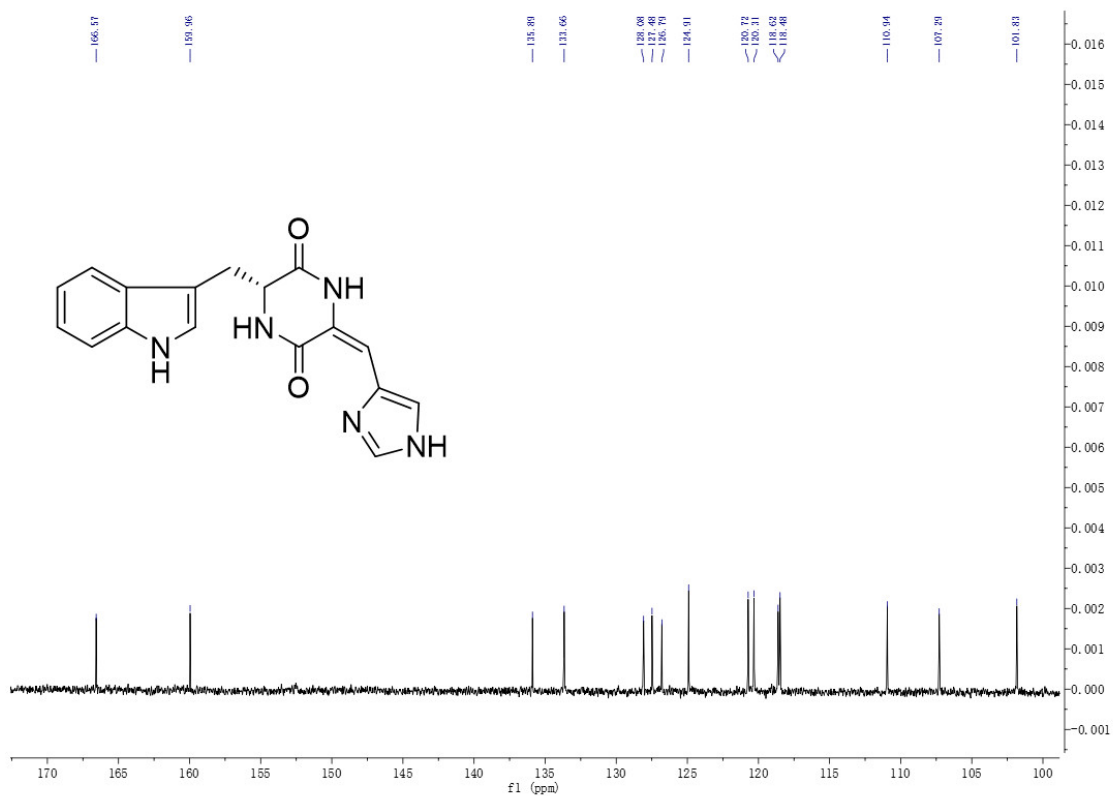

Figure S71. HMQC spectrum of penilloid C (**3**, in DMSO- $d_6$ )

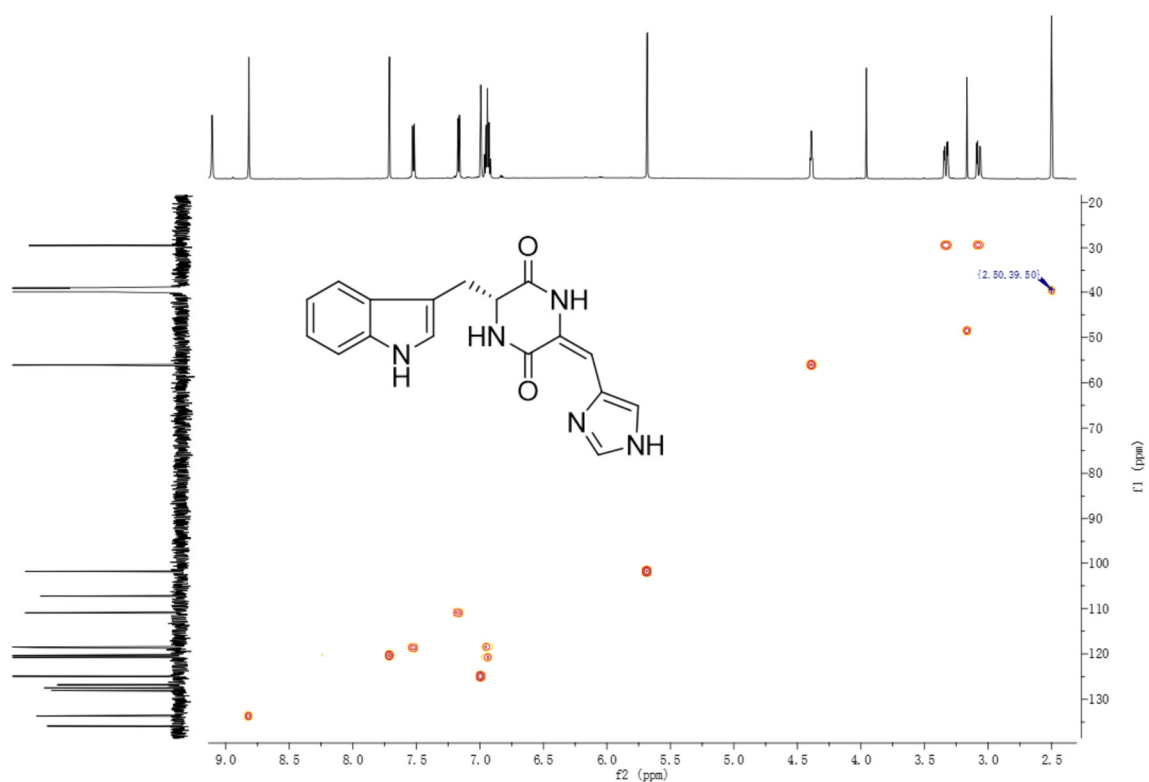

Figure S72. HMQC spectrum of penilloid C (**3**, in DMSO- $d_6$ )

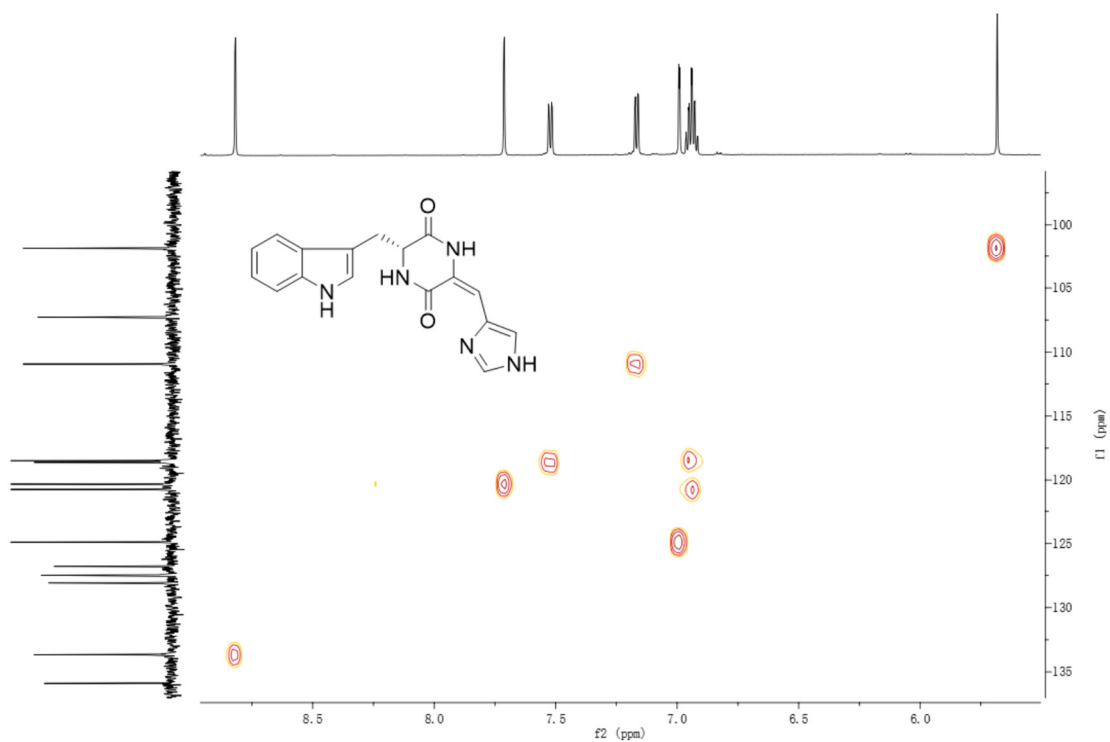

Figure S73. COSY spectrum of penilloid C (**3**, in DMSO-*d*<sub>6</sub>)

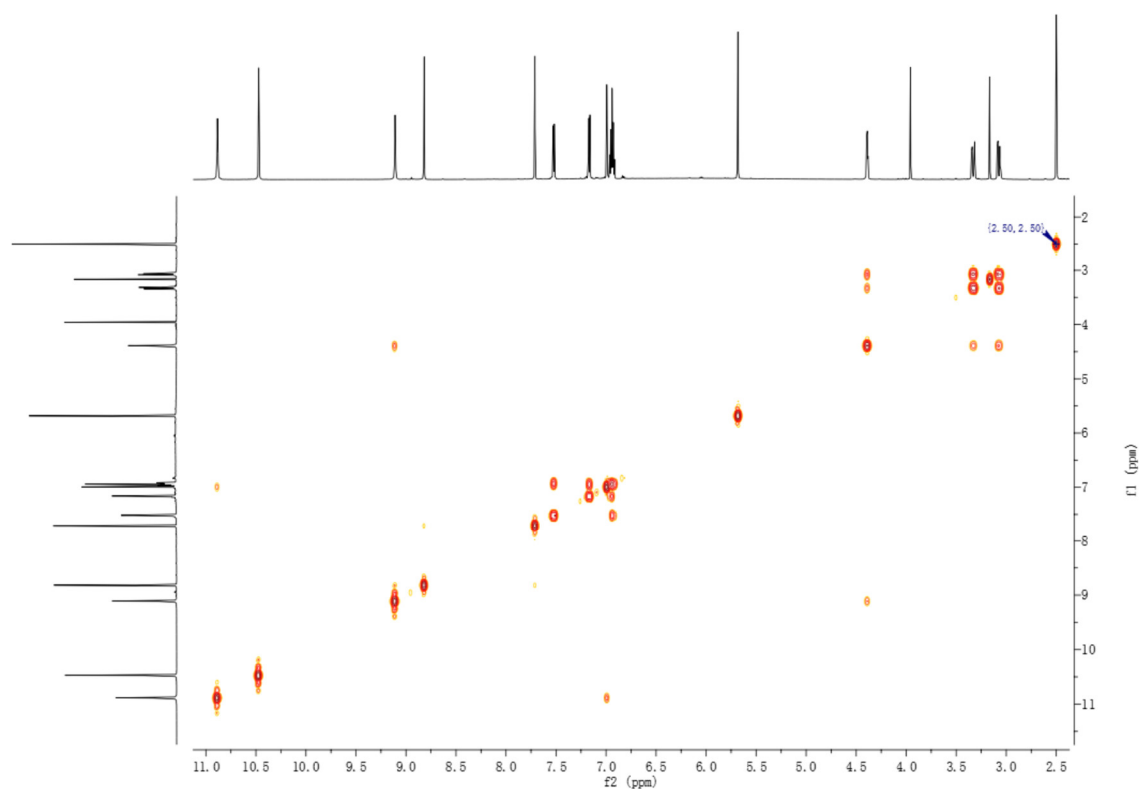

Figure S74. HMBC spectrum of penilloid C (**3**, in DMSO-*d*<sub>6</sub>)

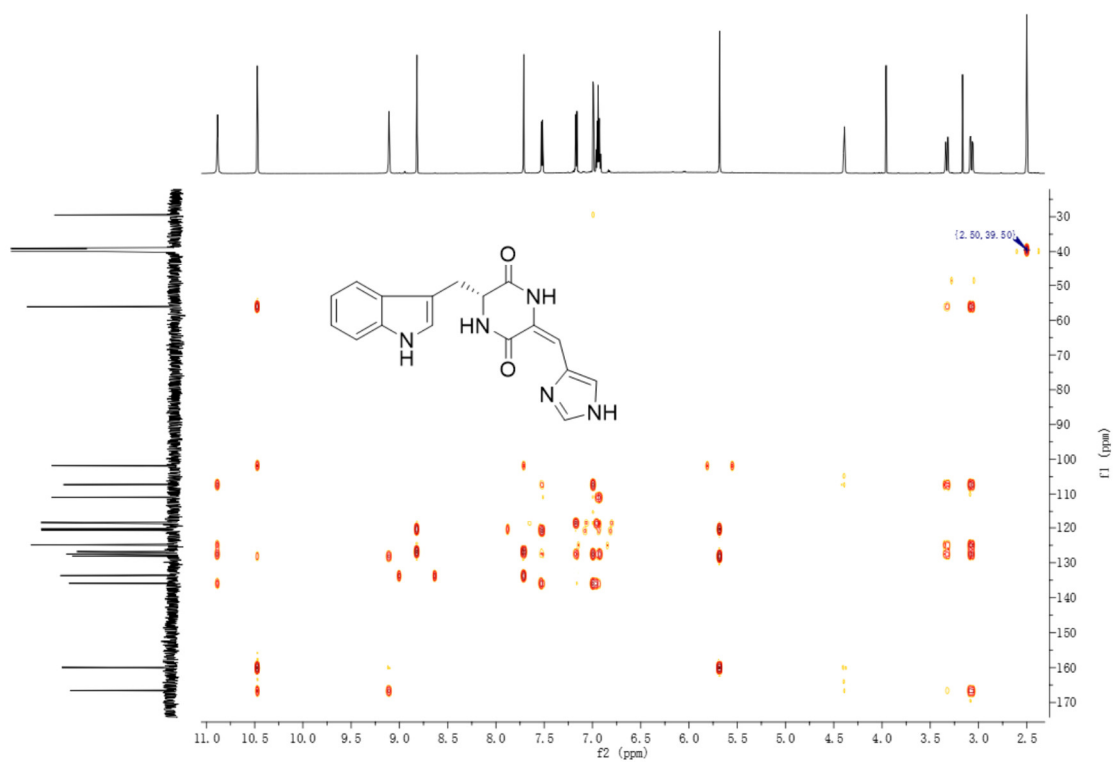

Figure S75. HMBC spectrum of penilloid C (**3**, in DMSO-*d*<sub>6</sub>)

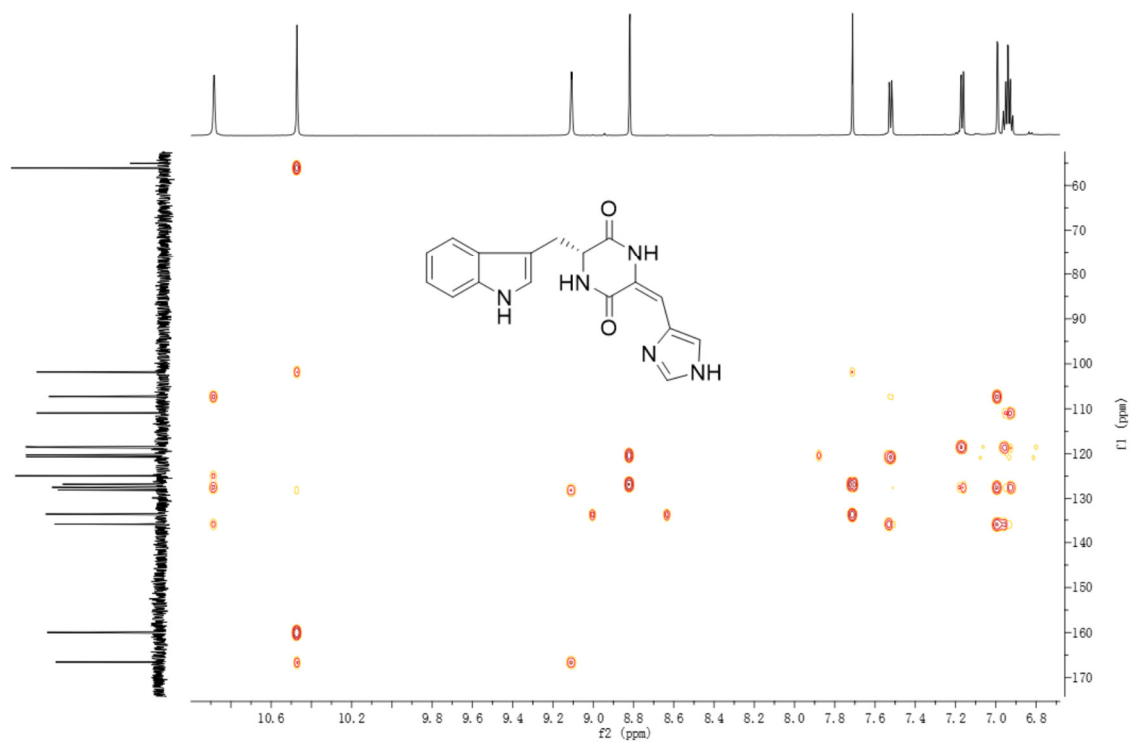

Figure S76. HMBC spectrum of penilloid C (**3**, in DMSO-*d*<sub>6</sub>)

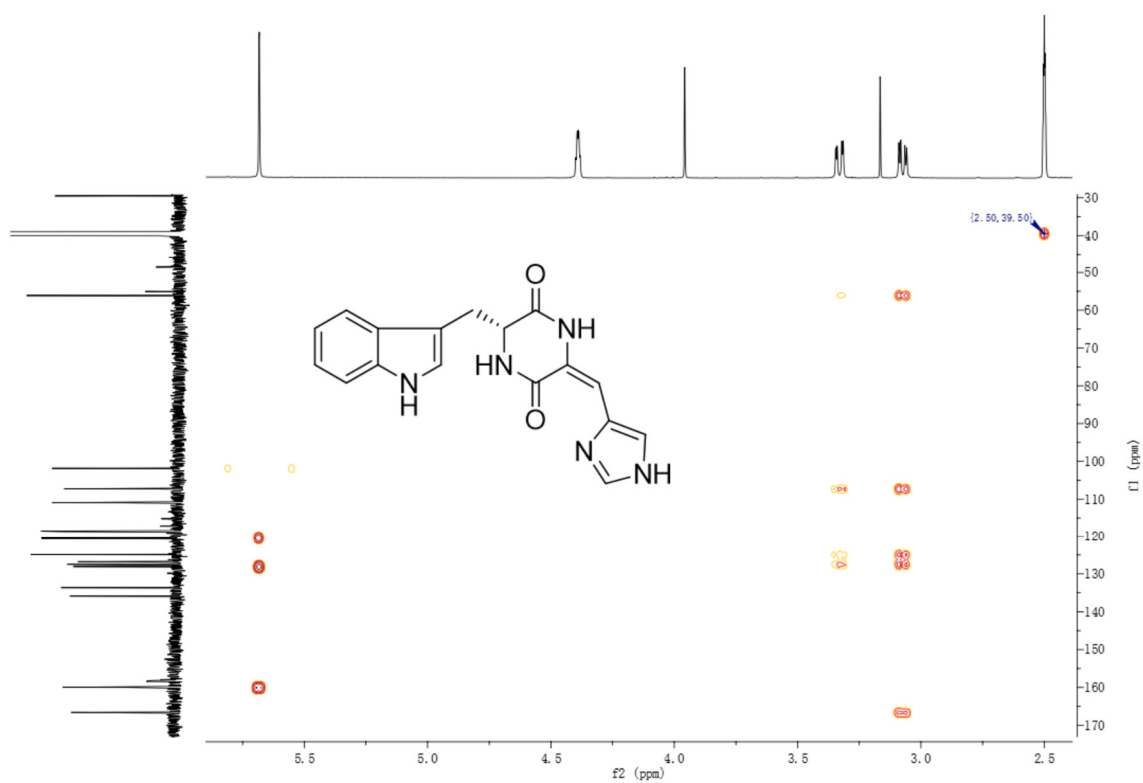



Figure S77. NOESY spectrum of penilloid C (**3**, in DMSO- $d_6$ )

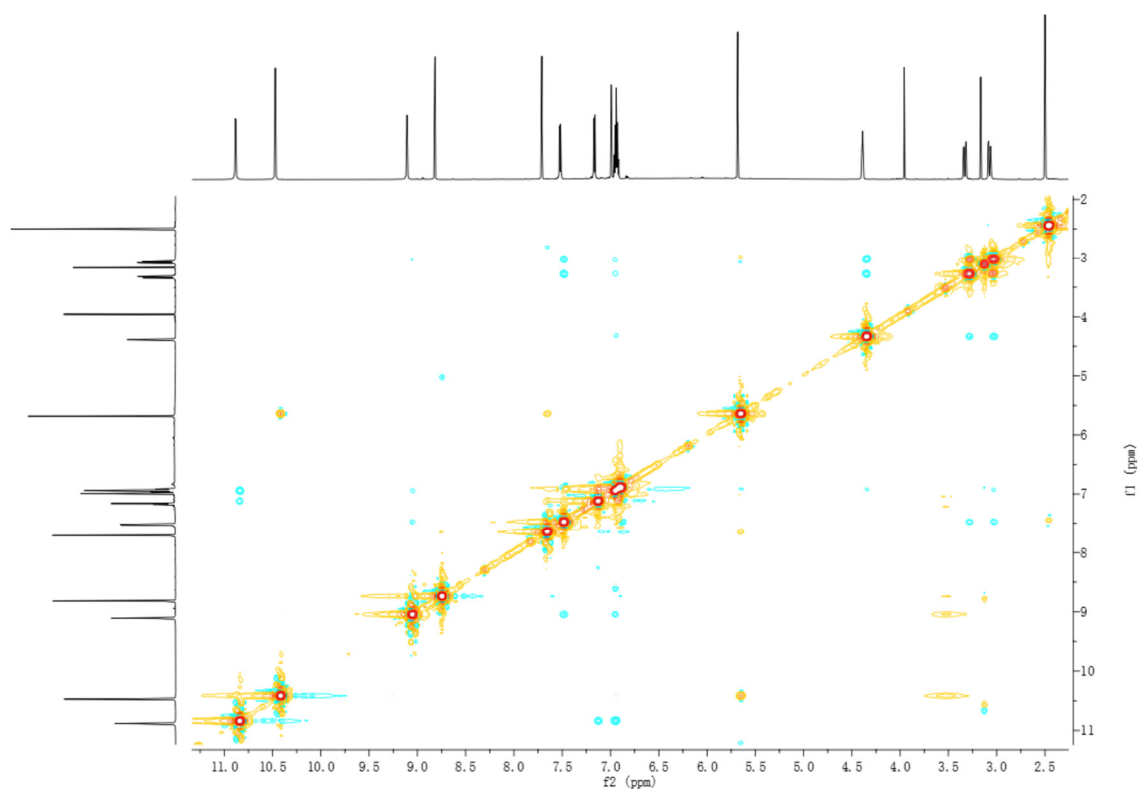

Figure S78.  $^1\text{H}$  NMR spectrum of penilloid C (**3**, in MeOH- $d_4$ )

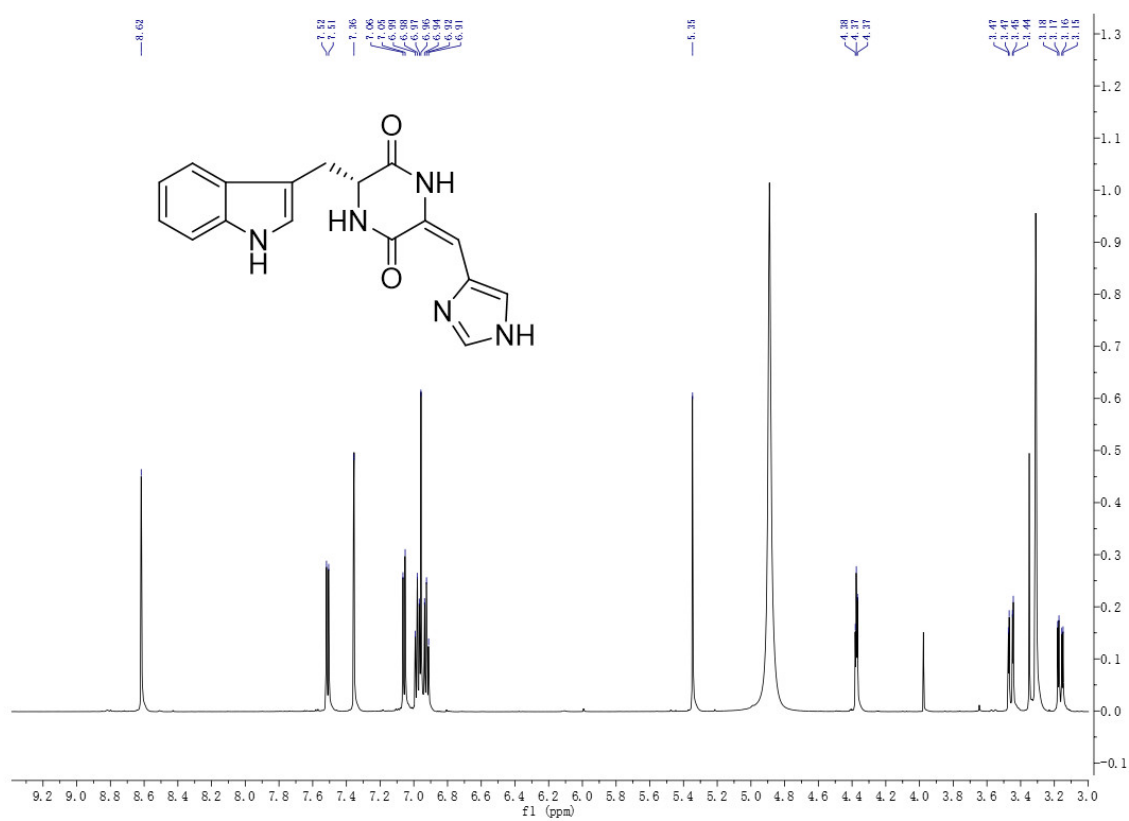

Figure S79.  $^1\text{H}$  NMR spectrum of penilloid C (**3**, in  $\text{MeOH-}d_4$ )

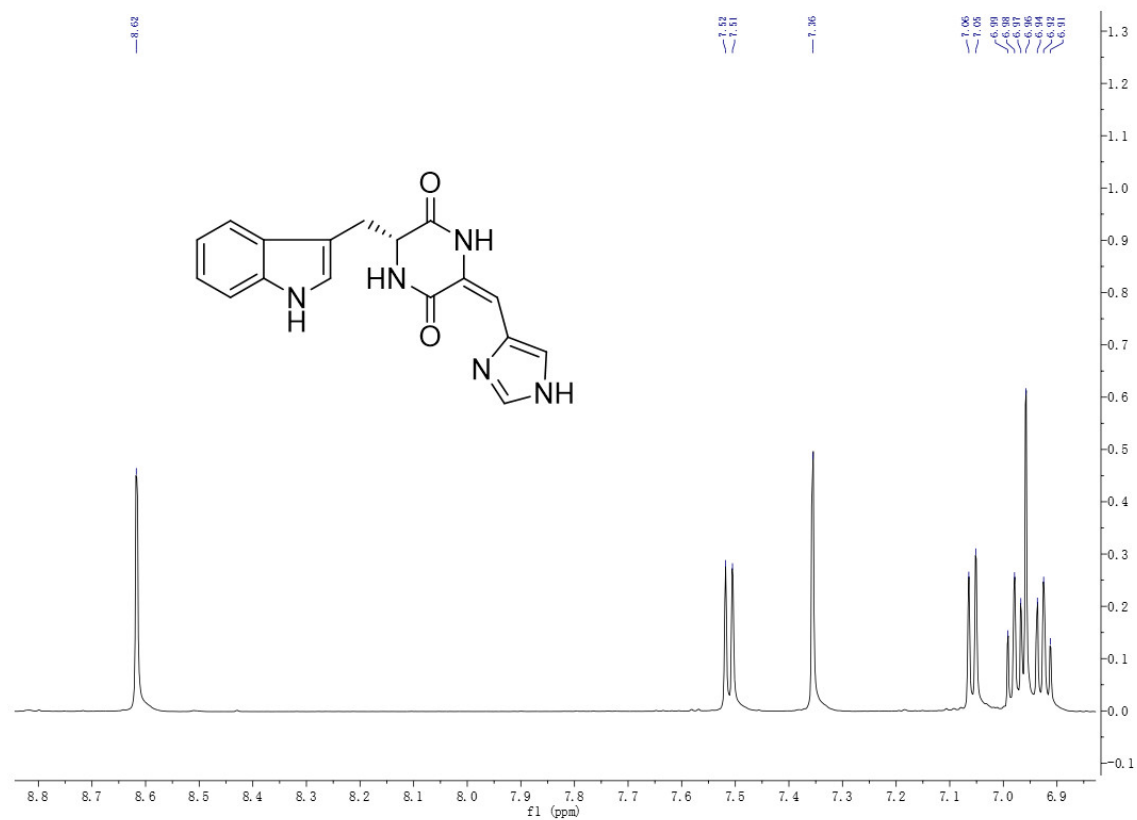

Figure S80.  $^1\text{H}$  NMR spectrum of penilloid C (**3**, in  $\text{MeOH-}d_4$ )

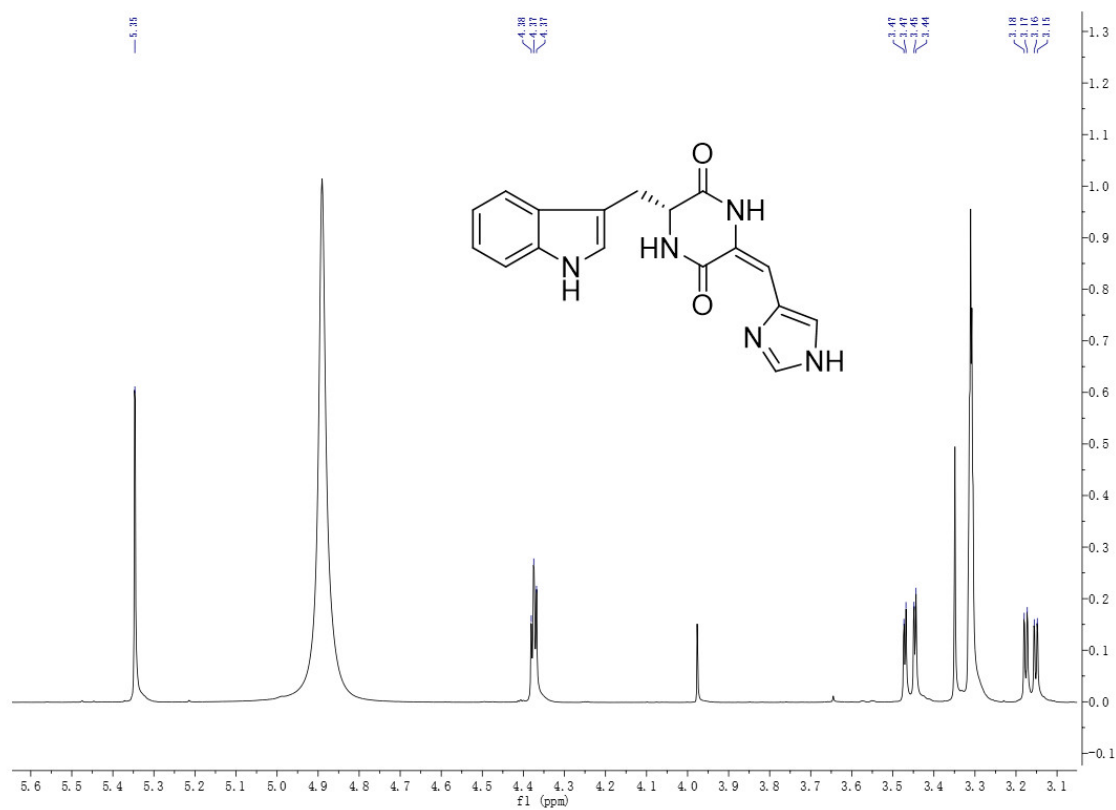

Figure S81.  $^{13}\text{C}$  NMR spectrum of penilloid C (**3**, in  $\text{MeOH-}d_4$ )

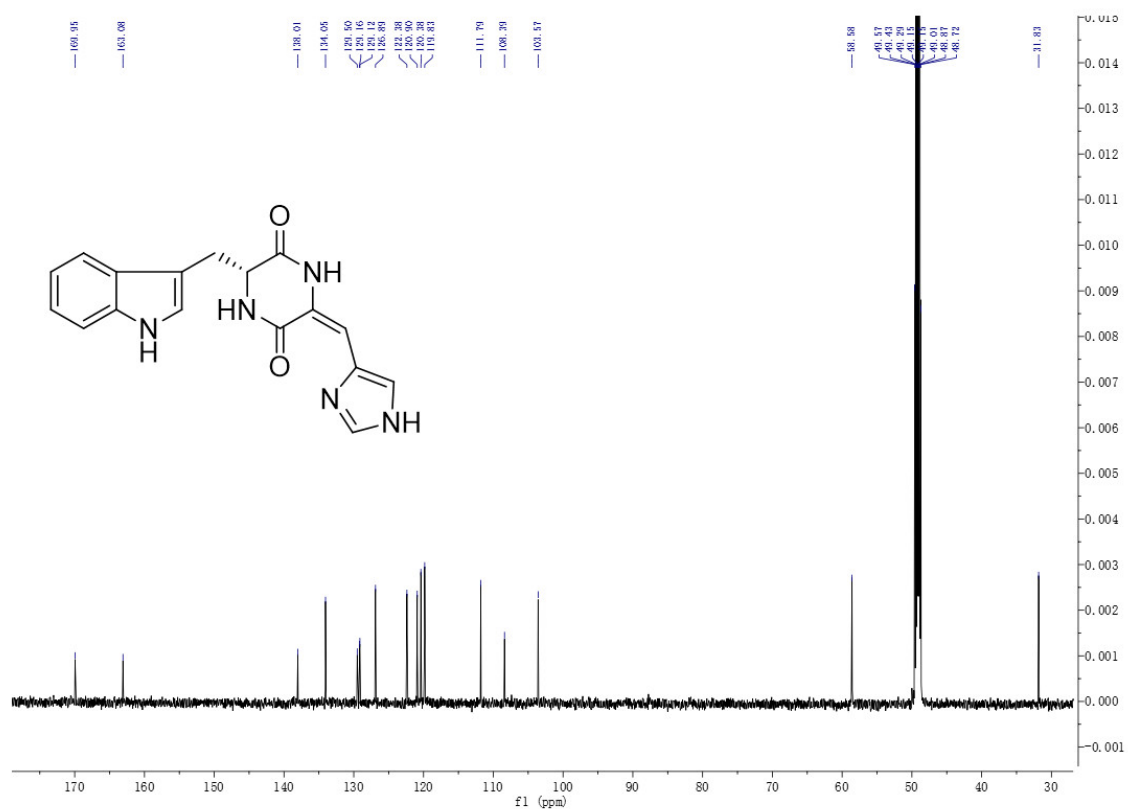

Figure S82.  $^{13}\text{C}$  NMR spectrum of penilloid C (**3**, in  $\text{MeOH-}d_4$ )

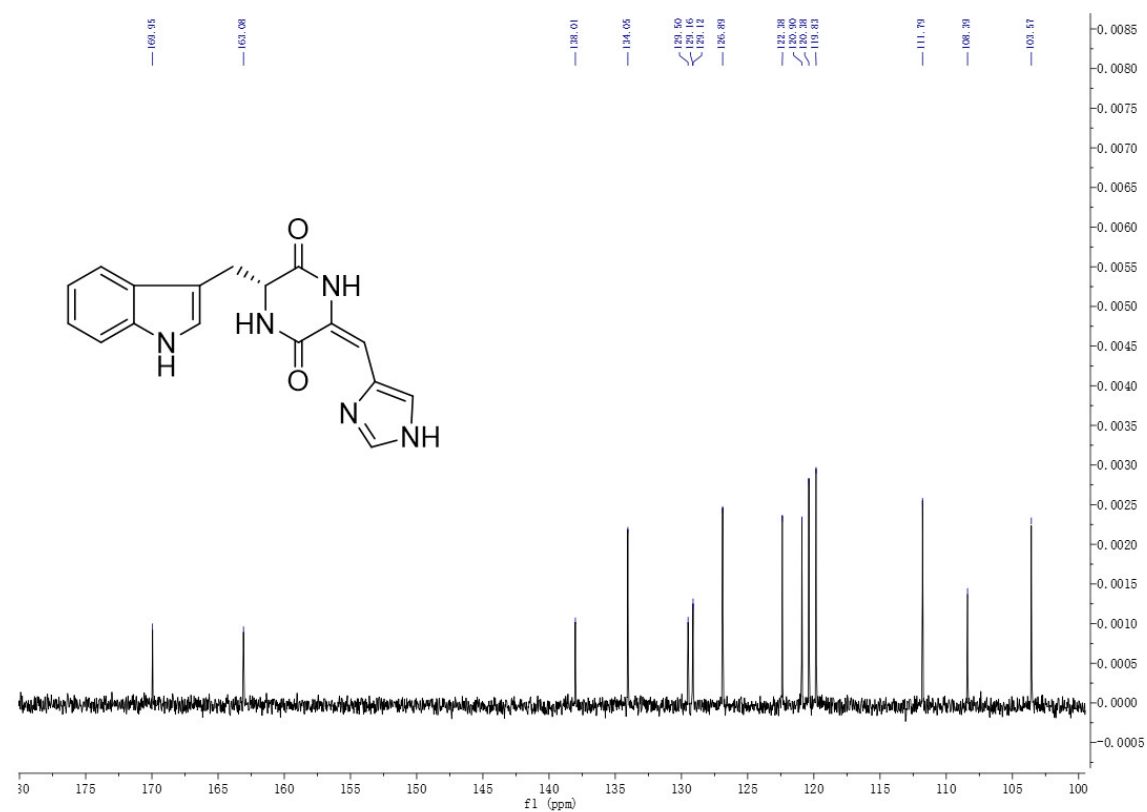

Figure S83. HRESIMS spectrum of penilloid C (**3**)

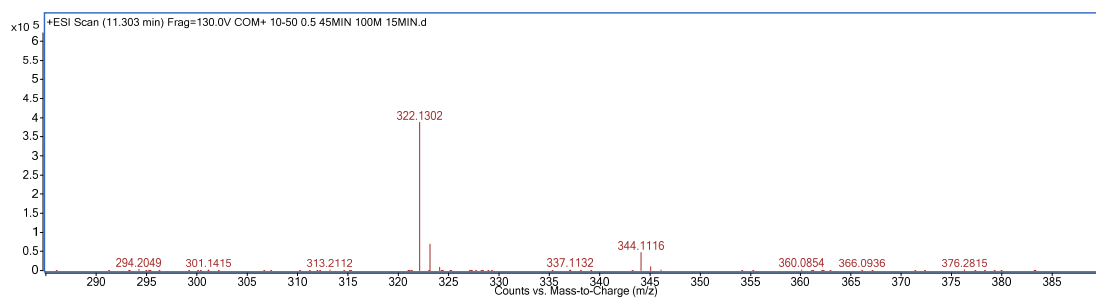

[M+H]<sup>+</sup>:  $m/z$  322.1302 (calcd for C<sub>17</sub>H<sub>16</sub>N<sub>5</sub>O<sub>2</sub><sup>+</sup>, 322.1299); [M+Na]<sup>+</sup>  $m/z$  344.1116 (calcd for C<sub>17</sub>H<sub>15</sub>N<sub>5</sub>NaO<sub>2</sub><sup>+</sup>, 344.1118).
